# Supplementary material for: Retinoic acid-induced protein 14 controls dendritic spine dynamics associated with depressive-like behaviors
Source: eLife journal article supplement (doi:10.7554/elife.77755), 2022-04-25
Supplement: fig1-figsupp1-data1 [file elife-77755-fig1-figsupp1-data1-v2.pdf]

**E**

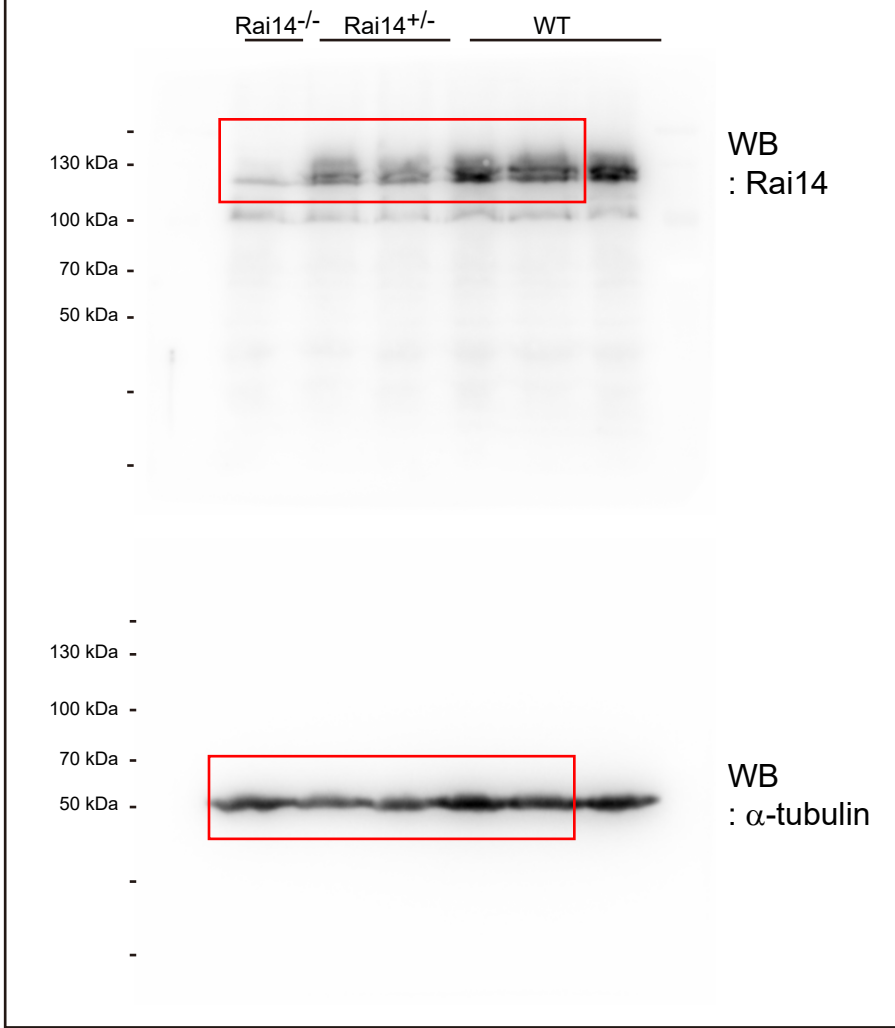

**Figure1–figure supplement 1**
