# Supplementary material for: Retinoic acid-induced protein 14 controls dendritic spine dynamics associated with depressive-like behaviors
Source: eLife journal article supplement (doi:10.7554/elife.77755), 2022-04-25
Supplement: fig2-figsupp2-data1 [file elife-77755-fig2-figsupp2-data1-v2.pdf]

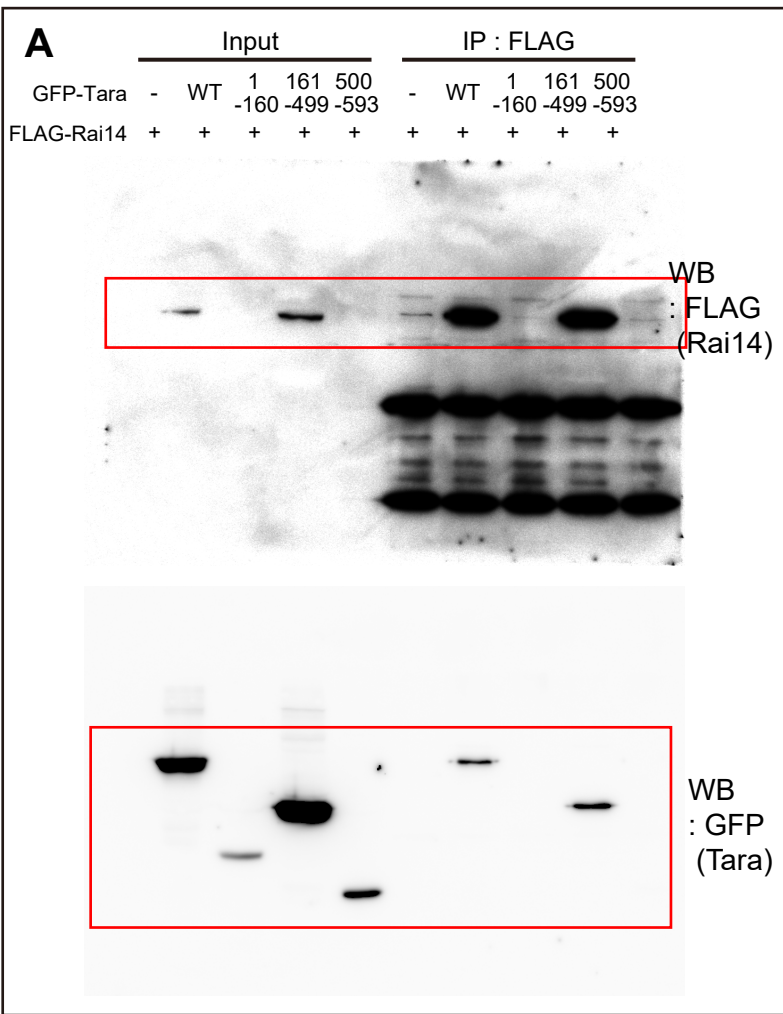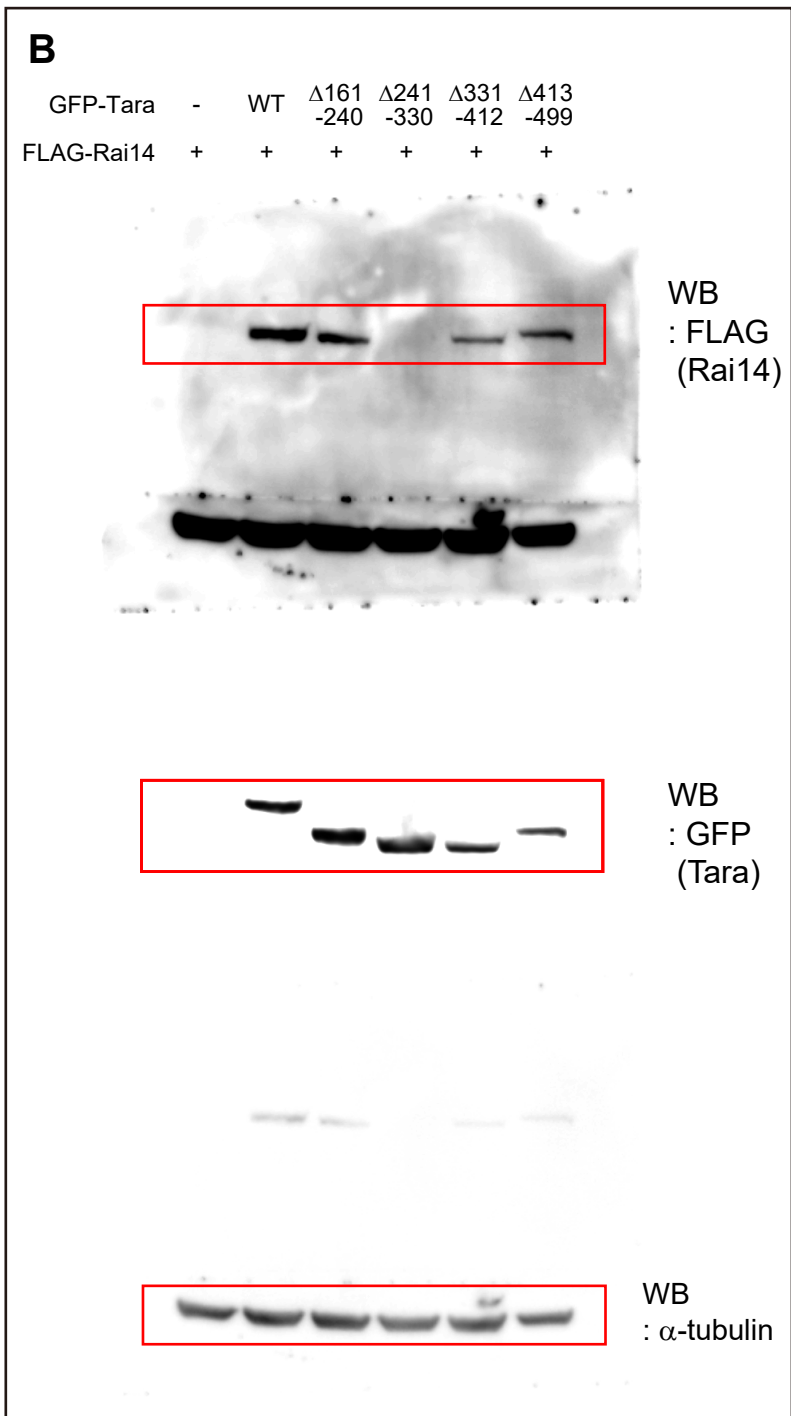

Figure2-figure supplement 2
