# Supplementary material for: Retinoic acid-induced protein 14 controls dendritic spine dynamics associated with depressive-like behaviors
Source: eLife journal article supplement (doi:10.7554/elife.77755), 2022-04-25
Supplement: fig3-figsupp1-data1 [file elife-77755-fig3-figsupp1-data1-v2.pdf]

**B**

| Input (12%) |    |      | IP: GFP   |    |      |
|-------------|----|------|-----------|----|------|
| Rai14-GFP   |    |      | Rai14-GFP |    |      |
| CTL         | WT | ΔANK | CTL       | WT | ΔANK |

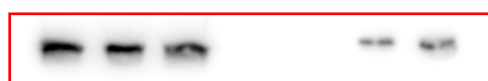WB  
: Tara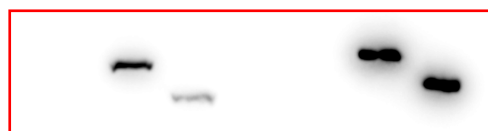WB  
: GFP  
(Rai14)**C**

| Rai14-GFP | WT |   | ΔANK |   | WT |   | ΔANK |   | WT |   | ΔANK |   |
|-----------|----|---|------|---|----|---|------|---|----|---|------|---|
| FLAG-Tara | -  | + | -    | + | -  | + | -    | + | -  | + | -    | + |

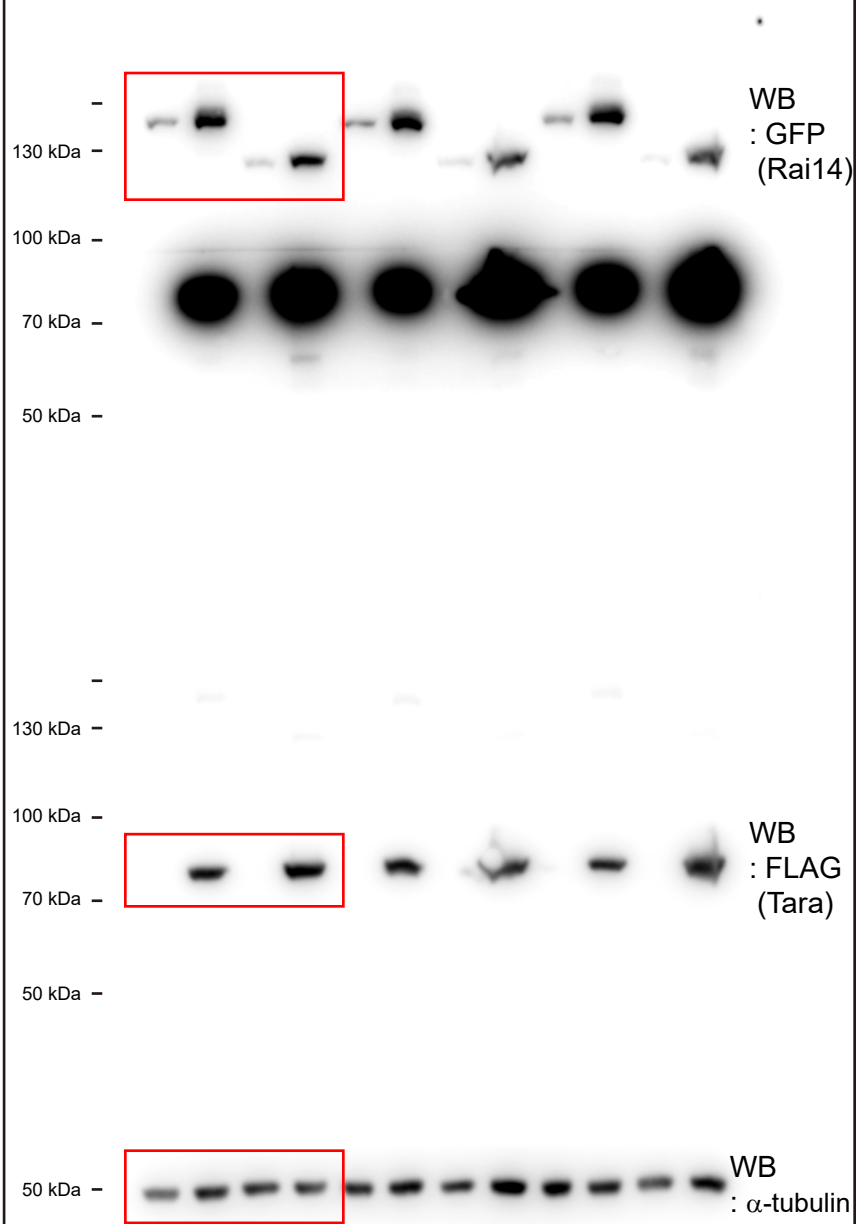WB  
: GFP  
(Rai14)WB  
: FLAG  
(Tara)WB  
: α-tubulin
