# Supplementary material for: Retinoic acid-induced protein 14 controls dendritic spine dynamics associated with depressive-like behaviors
Source: eLife. 2022 Apr 25;11:e77755. doi: 10.7554/eLife.77755 (PMC9068211; doi:10.7554/eLife.77755)
Supplement: Figure 2—source data 1. [file elife-77755-fig2-data1.xlsx]

## Sheet: Fig 2 C–D Tara KD
	Figure 2– Qaunification on Rai14 expression and dendritic spine density upon Tara KD.
		Figure 2 C				Figure 2 D
		endogenous Rai14 band intensity/ a-tubulin				spine density/ mm
		CTL	Tara KD			CTL	Rai14 KD	Tara KD	Rai14 KD + Tara KD
	number of values	22	22		number of neurons	25	24	25	26
	Mean ± SEM	100.0 ± 3.795	79.02 ± 3.202		Mean	6.543	4.932	5.146	4.53
	p-value	0.0001			Std. Deviation	1.829	1.151	1.697	1.548
	Significance	***			Std. Error	0.3659	0.2349	0.3394	0.3036
	Test	student's t-test			Test	1 way ANOVA with Bonferroni's Multiple Comparison Test
		96.1635	67.8703			9.57064	3.82239	3.31941	3.4017
		109.828	78.279			6.88504	4.65006	2.73026	5.92194
		94.0084	70.7472			3.59516	6.16902	4.58195	4.93398
		73.6579	102.791			4.48026	4.98792	5.15338	5.92261
		136.891	93.4287			7.44347	6.22513	7.68698	3.928
		108.528	97.3006			5.65658	4.90098	5.98841	4.30236
		108.89	72.2964			5.75921	3.95106	2.91392	3.70985
		81.3059	68.3676			9.57331	5.15912	6.1236	4.18749
		90.7268	79.4408			6.76713	3.8908	2.78409	6.25773
		117.445	76.836			6.33339	5.9551	8.27427	3.08671
		76.3762	81.9899			8.16102	5.22293	6.65981	3.23474
		121.013	106.182			3.97211	6.30832	8.80409	7.06493
		85.166	102.45			4.98626	6.11102	5.00752	4.0681
		129.142	59.6588			6.32432	6.05602	6.18958	4.73836
		88.6338	86.8308			8.33396	4.97273	5.21921	5.20942
		100.075	70.5187			7.02634	5.92612	5.98079	1.84815
		82.1487	61.0078			8.51039	4.78246	6.31457	7.93486
		80.5151	73.0528			6.8047	6.53966	5.57685	4.18349
		106.313	66.6308			5.60336	5.07795	4.17799	6.80699
		113.91	75.0053			9.88554	4.20974	3.74813	6.1027
		114.305	94.9231			7.8064	5.09079	3.24328	1.2365
		84.9567	52.7927			5.78898	3.10108	6.05241	3.72601
						3.17316	2.5558	4.57828	4.24686
						5.62927	2.69665	4.34869	3.70537
						5.49307		3.18623	4.29861
									3.73516

## Sheet: Fig 2 F–I Rai14 upregulation
	Figure 2– Qaunification on dendritic spine density in association with Tara-mediated Rai14 upregulation.
		Figure 2 F						Figure 2 G						Figure 2 H					Figure 2 I
		endogenous Rai14 band intensity/ a-tubulin						Rai14-GFP band intensity/ a-tubulin						spine density/ mm					spine density/ mm
		CTL	TaraWT	TaraD241-330	Tara241-330			Rai14WT	Rai14WT +Tara	Rai14D948-967	Rai14D948-967 +Tara			CTL	Rai14 +TaraWT	Rai14 +TaraD241-330			CTL	Rai14WT	Rai14WT +Tara	Rai14D948-967
	number of values	9	9	9	9		number of values	7	7	7	7		number of neurons	30	24	24		number of neurons	15	19	19	18
	Mean	100	142.9	94.5	160.3		Mean ± SEM	100.0 ± 12.91	285.3 ± 28.07	887.5 ± 162.2	797.8 ± 161.7		Mean	7.329	9.834	7.08		Mean	6.973	6.798	11.04	10.12
	Std. Deviation	19.52	28.35	13.78	38.02		p-value	< 0.0001		0.7021			Std. Deviation	1.859	1.837	2.276		Std. Deviation	1.576	1.544	1.911	1.522
	Std. Error	6.505	9.451	4.594	12.67		Significance	***		ns			Std. Error	0.3394	0.375	0.4646		Std. Error	0.4069	0.3543	0.4385	0.3588
	Test	1 way ANOVA with Bonferroni's Multiple Comparison Test					Test	student's t-test		student's t-test			Test	1 way ANOVA with Bonferroni's Multiple Comparison Test				Test	1 way ANOVA with Bonferroni's Multiple Comparison Test
		89.8983	134.71	96.9982	117.685			92.3069	384.692	743.284	266.748			7.29	10.24	6.7			6.53	5.15	12.34	7.49
		113.742	127.246	120.57	110.535			82.7941	164.484	688.416	384.745			6.42	10.74	5.88			5.68	4.77	9.42	11.12
		96.3601	108.288	91.1499	170.542			124.899	228.752	495.781	482.18			7.22	8.7	10.76			6.07	4.5	8.7	8.25
		118.813	182.623	79.1914	166.129			63.8957	284.154	651.798	790.493			8.79	14.67	7.96			6.99	7.65	15.94	11.24
		94.975	148.596	75.5009	183.824			136.104	311.765	624.308	1303.38			11.39	9.32	6.29			5	5.51	9.18	10.77
		86.2123	187.353	92.767	237.361			58.6312	271.03	1558.09	1192.27			10.58	9.08	5.31			4.09	6.54	8.19	9.28
		63.5012	140.541	89.9185	151.481			141.369	352.42	1450.73	1164.47			9.45	9.91	4.4			5.29	6.63	12.04	11.23
		127.61	149.927	95.6746	137.782									8	5.82	5.92			6.39	5.99	11.55	6.72
		108.889	107.122	108.694	167.625									4.96	9.34	8.49			7.07	7.4	10.97	10.9
														8.65	10.59	8.92			9.37	4.52	10.73	12.73
														9.28	8.37	4.84			8.04	8.4	8.66	9.12
														7.33	9.52	8.14			8.75	8.73	10.35	10.67
														7.66	11.69	5.48			8.54	8.3	11.38	10.61
														10.04	9.29	14.57			8.7	7.64	10.43	10.99
														9.4	6.68	5.78			8.08	9.01	11.1	10.52
														5.51	11.3	4.24				8.2	12.69	9.64
														5.64	9.59	7.32				8.73	11.1	9.31
														7.63	11.15	6.08				5.96	10.85	11.55
														7.87	9.32	8.53				5.54	14.14
														5.39	9.76	9.22
														4.61	13.1	6.83
														9.54	8.46	6.13
														5.44	10.55	6.44
														5.44	8.83	5.69
														6.6
														4.75
														5.9
														6.51
														5.76
														6.83
