# Supplementary material for: Retinoic acid-induced protein 14 controls dendritic spine dynamics associated with depressive-like behaviors
Source: eLife. 2022 Apr 25;11:e77755. doi: 10.7554/eLife.77755 (PMC9068211; doi:10.7554/eLife.77755)
Supplement: Figure 3—source data 1. [file elife-77755-fig3-data1.xlsx]

## Sheet: Fig 3 source data
	Figure 3– Source data for Rai14 localization and dendritic spine dynamics.
		Figure 3 A										Figure 3 B					Figure 3 C					Figure 3 E										Figure 3 G												Figure 3 H
		normalized intensity [%]										Rai14 clusters at neck/ total Rai14 clusters [%]					spine density/ mm					fraction of spines [%]										normalized spine density [%]												fraction of spines [%]
	Rai14 + Tara			Rai14D948-967			Rai14DANK + Tara					Rai14 +Tara	Rai14D948-967	Rai14DANK +Tara			Rai14 +Tara	Rai14D948-967	Rai14DANK +Tara			Rai14 -negative	Rai14 -positive	Rai14 -negative	Rai14 -positive	Rai14 -negative	Rai14 -positive	Rai14 -negative	Rai14 -positive			CTL					Rai14 + Tara							CTL	Rai14 +Tara	CTL	Rai14 +Tara
	dist. from spine base	Rai14	RFP	dist. from spine base	Rai14D948-967	RFP	dist. from spine base	Rai14DANK	RFP		number of neurons	6	6	6		number of neurons	7	7	7		number of neurons	5	5	5	5	5	5	5	5		number of neurons	9					9						number of neurons	9	9	9	9
	-0.71	7.61095	100	-1.11	38.2168	24.7819	-0.72	67.3683	97.8333		Mean	71.92	63.73	19.59		Mean	10.71	11.14	7.779		Mean	33.27	2.65	33.19	46.39	12.07	17.08	21.47	33.88		Mean	100	88.74	71.09	58.9	48.85	100	98	96.42	92.68	90.93		Mean ± SEM	55.23 ± 4.392	24.61 ± 2.603	6.588 ± 1.888	16.40 ± 2.711
	-0.61	23.667	98.4082	-1	41.9318	29.1536	-0.63	86.7206	97.7439		Std. Deviation	5.645	4.836	6.348		Std. Deviation	0.9346	2.21	1.363		p-value	P<0.01		P > 0.05		P > 0.05		P > 0.05			p-value	P > 0.05	P > 0.05	P<0.001	P<0.001	P<0.001	P > 0.05	P > 0.05	P<0.001	P<0.001	P<0.001		p-value	< 0.0001		0.009
	-0.51	44.4117	93.5341	-0.89	47.4757	31.6915	-0.54	99.3031	95.3595		Std. Error	2.304	1.974	2.591		Std. Error	0.3533	0.8355	0.5153		significance	**		ns		ns		ns			significance	ns	ns	***	***	***	ns	ns	***	***	***		significance	***		**
	-0.4	79.4624	87.3648	-0.77	40.0267	51.362	-0.45	100	90.5875		Test	1 way ANOVA with Bonferroni's Multiple Comparison Test				Test	1 way ANOVA with Bonferroni's Multiple Comparison Test				Test	2 way ANOVA with Bonferroni Post Test									Test	2 way ANOVA with Bonferroni Post Test											Test	student's t-test		student's t-test
	-0.3	100	64.2636	-0.66	37.8548	75.3289	-0.36	85.7703	86.2459			78.0488	57.8125	25			10.66	10.5	6.16			disappeared		grown		no change		shrinkage			time point [min]	-10	10	30	60	120	-10	10	30	60	120			eliminated		newly formed
	-0.2	66.3668	42.9647	-0.55	37.8739	97.0589	-0.27	50.6136	66.128			67.2727	66	18.5185			10.54	9.07	8.25			28.5714	0	33.3333	41.1765	19.0476	35.2941	19.0476	23.5294			100	90.7408	88.8889	77.7778	57.4074	100	103.39	94.9152	86.4407	72.8813			41.8182	26.6667	0	0
	-0.1	46.0473	31.9245	-0.44	33.3778	100	-0.18	29.7876	42.8947			63.7931	66.6667	10.3448			9.09	14.29	7.48			40	7.69231	33.3333	53.8462	13.3333	7.69231	13.3333	30.7692			100	76.6667	56.6667	43.3333	33.3333	100	96.6667	90	88.3333	88.3333			66.6667	20.8955	0	10.4478
	0	29.9204	18.3259	-0.33	34.0255	90.2201	-0.09	13.5023	24.4985			74.2857	69.8413	27.7778			10.64	13.59	9.72			59.2593	0	14.8148	33.3333	0	13.3333	25.9259	53.3333			100	67.3077	55.7692	50	36.5385	100	93.8776	85.7143	77.551	77.551			66.0714	30.7692	7.14286	9.61538
	0.1	38.8834	16.9447	-0.22	61.0973	61.6867	0	6.371	12.5473			70.9677	63.8889	20.5128			11.09	11.84	8.74			22.7273	5.55556	31.8182	38.8889	22.7273	5.55556	22.7273	50			100	94.5946	62.1622	51.3514	45.9459	100	102.778	94.4445	77.7778	97.2222			55.2632	23.6842	2.63158	21.0526
	0.2	47.0832	16.3801	-0.11	82.7396	41.7106	0.09	4.48903	11.5614			77.1739	58.1818	15.3846			10.66	10.24	8.16			15.7895	0	52.6316	64.7059	5.26316	23.5294	26.3158	11.7647			100	90.7692	69.2308	56.9231	44.6154	100	105.454	114.546	114.546	103.636			60.2941	18.9189	7.35294	21.6216
	0.3	58.4287	22.9928	0	100	15.4759	0.18	2.31843	9.09741								12.27	8.42	5.94													100	93.1818	75	68.1818	59.0909	100	100	106.667	102.222	111.111			42.5532	8	4.25532	18
	0.4	48.6806	29.9308	0.11	94.2084	10.1785	0.27	2.2715	8.16184																							100	97.3684	76.3158	68.421	60.5263	100	96.0784	94.1176	100	94.1176			53.6585	31.1475	17.0732	26.2295
	0.51	37.6131	28.0296	0.22	71.4231	11.1751	0.36	2.47096	6.39628																							100	94.5946	70.2703	37.8379	32.4324	100	90.9091	94.5455	87.2727	85.4545			75	32.3529	12.5	20.5882
	0.61	16.3395	30.505	0.33	47.3424	17.8589	0.45	1.22961	6.45963																							100	93.421	85.5263	76.3158	69.7368	100	92.8571	92.8571	100	88.0952			35.7143	29.0909	8.33333	20
	0.71	6.47694	34.0872	0.44	38.7121	27.7805	0.54	1.23196	8.35512
	0.81	4.63417	32.151	0.55	56.4489	45.223	0.63	1.04658	15.2858
	0.91	3.24937	29.5161	0.66	78.9674	48.0843	0.72	1.40326	20.6393
	1.01	2.04449	25.3533	0.77	59.6876	37.4098	0.8	1.04893	23.8797
	1.11	1.58652	21.2638	0.89	43.4368	24.7907	0.89	0.875279	20.4379
	1.21	1.5211	21.3563	1	28.1387	25.9202	0.98	0.706324	14.9106
	1.31	1.2376	17.4742	1.11	19.5656	14.4129	1.07	0.668779	9.47586
	1.42	1.18308	11.4964	1.22	9.54467	6.13899	1.16	0.621847	5.35514
	1.52	0.239887	7.47392	1.33	4.22938	5.07596	1.25	0.30271	2.87492
	1.62	0.327118	3.87891	1.44	2.45761	3.83576	1.34	0.61246	1.80129
	1.72	0.376186	1.08775	1.55	1.25738	1.64326	1.43	0	0.508389
	1.82	0	0.800663	1.66	0.133359	0	1.52	0.410654	0.191661
	1.92	0.485225	0.446585	1.77	0	1.21362	1.61	0.351989	0
