# Supplementary material for: Retinoic acid-induced protein 14 controls dendritic spine dynamics associated with depressive-like behaviors
Source: eLife. 2022 Apr 25;11:e77755. doi: 10.7554/eLife.77755 (PMC9068211; doi:10.7554/eLife.77755)
Supplement: Figure 4—source data 1. [file elife-77755-fig4-data1.xlsx]

## Sheet: Fig 4 B–G
	Figure 4– Source data for synapse number and mEPSCs in association with Rai14.
		Figure 4 B				Figure 4 C				Figure 4 D				Figure 4 F				Figure 4 G
		PSD95/SYP-positive spines [%]				PSD95/SYP-positive spines [%]				PSD95/SYP-positive spines [%]				mEPSC frequency [Hz]				mEPSC amplitude [pA]
		CTL	Rai14 +Tara			Rai14 -negative	Rai14 -positive			WT	Rai14-/-			WT	Rai14+/-			WT	Rai14+/-
	number of neurons	9	8		number of neurons	8	8		number of neurons	13	18		number of mouse brains	3	3		number of mouse brains	3	3
	Mean	9	13.25		Mean	8.245	18.23		Mean	10.66	7.11		Mean	0.5533	0.285		Mean	5.595	5.801
	Std. Deviation	3.303	1.93		Std. Deviation	1.914	3.629		Std. Deviation	2.384	1.865		Std. Deviation	0.09279	0.05065		Std. Deviation	0.208	0.1877
	Std. Error	1.101	0.6822		Std. Error	0.6767	1.283		Std. Error	0.6611	0.4395		Std. Error	0.05357	0.02924		Std. Error	0.1201	0.1084
	Test	student's t-test			Test	student's t-test			Test	student's t-test			Test	student's t-test			Test	student's t-test
		12.1495	14.3836			9.375	18.2927			8.5859	2.5316		mouse 1 average	0.657222	0.333333		mouse 1 average	5.72015	6.01113
		9.6774	13.4328			11.1111	16.129			12.3762	6.8702		mouse 1 neuron1	0.85	0.533333		mouse 1 neuron1	6.99376	4.42308
		8.3333	12.4031			7.7778	23.0769			8.156	6.3559		mouse 1 neuron2	0.577778	0.316667		mouse 1 neuron2	4.82482	5.78344
		7.3394	14.8148			5	20.5882			9.2105	6.4327		mouse 1 neuron3	0.494444	0.294444		mouse 1 neuron3	5.07431	6.19565
		10.9756	16.6667			8.8235	23.1707			11.8943	7.7465		mouse 1 neuron4	0.472222	0.427778		mouse 1 neuron4	4.33091	7.09935
		6.3636	11.5044			9.2857	15.1163			13.6842	6.4846		mouse 1 neuron5	0.416667	0.405556		mouse 1 neuron5	4.37004	6.51637
		14.7287	11.2676			8.3333	14.2857			16.0714	7.2289		mouse 1 neuron6	1.01111	0.35		mouse 1 neuron6	7.58312	7.21195
		3.6585	11.5385			6.25	15.2174			9.5775	4.5802		mouse 1 neuron7	0.866667	0.227778		mouse 1 neuron7	6.7916	5.79156
		7.7778								11.413	7.0796		mouse 1 neuron8	0.766667	0.238889		mouse 1 neuron8	5.69964	6.64497
										10.2273	6.8182		mouse 1 neuron9	0.516667	0.344444		mouse 1 neuron9	5.30462	5.02297
										7.8947	5.5814		mouse 1 neuron10	0.6	0.194444		mouse 1 neuron10	6.2287	5.42197
										8.9202	6.7797		mouse 2 average	0.478788	0.232323		mouse 2 average	5.35511	5.65074
										10.5769	10.9756		mouse 2 neuron1	0.616667	0.205556		mouse 2 neuron1	4.65813	4.76338
											7.7922		mouse 2 neuron2	0.355556	0.15		mouse 2 neuron2	4.51953	5.46743
											7.7922		mouse 2 neuron3	0.711111	0.166667		mouse 2 neuron3	7.19459	7.96035
											8.1967		mouse 2 neuron4	0.361111	0.266667		mouse 2 neuron4	5.93016	4.45385
											9.1667		mouse 2 neuron5	0.466667	0.244444		mouse 2 neuron5	5.17698	4.87518
											9.5652		mouse 2 neuron6	0.416667	0.222222		mouse 2 neuron6	3.7273	4.49413
													mouse 2 neuron7	0.311111	0.205556		mouse 2 neuron7	4.33384	3.95094
													mouse 2 neuron8	0.305556	0.288889		mouse 2 neuron8	5.0618	6.029
													mouse 2 neuron9	0.383333	0.216667		mouse 2 neuron9	6.32855	7.64603
													mouse 2 neuron10	0.905556	0.338889		mouse 2 neuron10	6.62893	6.81153
													mouse 2 neuron11	0.433333	0.25		mouse 2 neuron11	5.34643	5.70631
													mouse 3 average	0.52381	0.289352		mouse 3 average	5.71027	5.73983
													mouse 3 neuron1	0.438889	0.172222		mouse 3 neuron1	6.32172	4.89693
													mouse 3 neuron2	0.566667	0.255556		mouse 3 neuron2	5.37591	6.20357
													mouse 3 neuron3	0.405556	0.238889		mouse 3 neuron3	5.20524	7.34476
													mouse 3 neuron4	0.294444	0.333333		mouse 3 neuron4	4.55144	6.9352
													mouse 3 neuron5	0.361111	0.316667		mouse 3 neuron5	6.50403	7.0912
													mouse 3 neuron6	0.916667	0.166667		mouse 3 neuron6	5.74987	3.43036
													mouse 3 neuron7	0.461111	0.494444		mouse 3 neuron7	4.86823	7.60145
													mouse 3 neuron8	0.961111	0.422222		mouse 3 neuron8	6.63019	6.50118
													mouse 3 neuron9	0.635714	0.283333		mouse 3 neuron9	6.51394	4.94577
													mouse 3 neuron10	0.322222	0.25		mouse 3 neuron10	6.35166	4.50164
													mouse 3 neuron11	0.455556	0.261111		mouse 3 neuron11	5.66934	4.8712
													mouse 3 neuron12	0.466667	0.277778		mouse 3 neuron12	4.78172	4.55468

## Sheet: Fig 4 F cumulative
	Figure 4 F– Source data for cumulative mEPSC frequency
interval	wild type																																	Rai14+/-
0	0	0	0	0	0	0	0	0	0	0	0	0	0	0	0	0	0	0	0	0	0	0	0	0	0	0	0	0	0	0	0	0	0	0	0	0	0	0	0	0	0	0	0	0	0	0	0	0	0
20	0	0	0	0	0	0	0	0	0	0	0	0	0	0	0	0	0	0	0	0	0	0	2	2.78	3.92	0	1.22	0	0	0	0	0	0	0	0	0	0	1.39	0	0	0	0	0	0	0	0	0	0	0
40	1.32	0.97	3.41	1.19	1.35	1.57	4.52	2.19	0	0	0	0	0	0	0	0	0	0	0	0.62	0	0	5	2.78	3.92	0	2.44	0	1.18	0	0	0	0	1.05	0	0	0	1.39	0	0	0	1.64	0	0	0	0	0	0	0
60	6.58	0.97	5.68	1.19	1.35	3.14	6.45	5.11	1.09	3.74	2.75	1.59	0.75	0	1.22	0	0	0	0	10.49	1.3	0	8	4.17	3.92	1.56	10.98	0	2.94	3.41	0	0	2.44	2.11	0	0	0	1.39	0	0	0	1.64	0	0	0	0	0	0	0
80	7.89	1.94	7.95	3.57	2.7	3.14	8.39	7.3	3.26	5.61	5.5	3.17	2.26	0	4.88	0	0	1.85	0	19.75	2.6	1.28	9	6.94	5.88	1.56	18.9	1.22	4.71	5.68	1.75	2.53	6.1	3.16	0	0	0	1.39	0	0	0	1.64	0	0	0	0	0	0	0
100	11.18	2.91	9.09	3.57	4.05	6.28	8.39	10.22	3.26	5.61	5.5	4.76	2.26	1.56	4.88	1.35	0	1.85	2.99	25.31	7.79	2.56	13	6.94	5.88	1.56	25.61	1.22	4.71	6.82	3.51	2.53	7.32	4.21	0	0	0	1.39	1.64	0	0	1.64	0	0	0	0	0	0	0
120	14.47	6.8	9.09	3.57	8.11	7.85	8.39	11.68	3.26	7.48	8.26	7.94	3.01	3.13	8.54	2.7	0	1.85	4.48	33.95	10.39	2.56	13	13.89	5.88	1.56	29.88	1.22	7.06	7.95	5.26	5.06	10.98	4.21	0	0	0	2.78	8.2	0	2.38	1.64	0	0	0	0	2.13	0	0
140	16.45	8.74	9.09	4.76	8.11	9.95	10.32	11.68	6.52	10.28	9.17	11.11	4.51	3.13	8.54	6.76	0	1.85	5.97	34.57	12.99	2.56	15	15.28	5.88	3.13	34.76	1.22	8.24	9.09	7.02	10.13	12.2	5.26	0	0	1.32	2.78	8.2	0	4.76	4.92	0	0	0	0	2.13	0	0
160	18.42	8.74	10.23	8.33	8.11	14.14	12.9	13.14	7.61	13.08	9.17	12.7	5.26	3.13	9.76	8.11	0	1.85	7.46	37.04	12.99	2.56	16	15.28	5.88	7.81	37.8	1.22	9.41	11.36	8.77	10.13	12.2	7.37	0	0	2.63	2.78	8.2	2.56	4.76	4.92	0	0	0	0	2.13	0	0
180	20.39	8.74	12.5	8.33	8.11	17.28	14.84	14.6	7.61	14.02	9.17	15.87	8.27	4.69	10.98	8.11	0	3.7	7.46	40.74	15.58	2.56	16	15.28	5.88	7.81	39.63	1.22	11.18	12.5	8.77	10.13	15.85	9.47	0	0	3.95	5.56	8.2	2.56	4.76	6.56	0	0	0	3.45	2.13	0	0
200	21.05	11.65	13.64	8.33	9.46	18.85	16.13	16.79	9.78	14.95	10.09	15.87	9.02	4.69	12.2	8.11	0	5.56	7.46	45.06	16.88	3.85	19	16.67	9.8	10.94	42.68	1.22	13.53	13.64	8.77	11.39	17.07	9.47	0	0	3.95	5.56	9.84	2.56	4.76	6.56	2.94	0	0	3.45	2.13	0	0
220	22.37	14.56	13.64	9.52	9.46	20.94	16.77	17.52	11.96	14.95	11.93	15.87	9.77	4.69	13.41	8.11	0	7.41	8.96	48.15	18.18	3.85	20	16.67	11.76	10.94	45.12	1.22	14.71	15.91	8.77	11.39	18.29	10.53	0	0	5.26	6.94	9.84	2.56	7.14	8.2	2.94	0	0	3.45	2.13	2.33	0
240	23.68	14.56	13.64	11.9	9.46	20.94	18.06	18.98	11.96	15.89	13.76	15.87	12.78	4.69	15.85	8.11	3.64	11.11	10.45	49.38	19.48	6.41	20	18.06	11.76	12.5	46.34	2.44	17.65	15.91	8.77	12.66	19.51	11.58	1.79	0	5.26	6.94	9.84	7.69	11.9	8.2	2.94	0	0	3.45	2.13	2.33	2.56
260	23.68	15.53	13.64	11.9	9.46	23.04	20.65	18.98	14.13	16.82	14.68	15.87	16.54	4.69	17.07	9.46	3.64	12.96	10.45	51.23	22.08	6.41	20	18.06	11.76	12.5	46.95	3.66	18.82	17.05	8.77	13.92	19.51	12.63	1.79	1.92	5.26	8.33	9.84	7.69	11.9	8.2	2.94	2.78	0	3.45	2.13	2.33	2.56
280	23.68	16.5	14.77	13.1	9.46	26.7	21.29	19.71	15.22	18.69	15.6	17.46	16.54	6.25	20.73	9.46	3.64	16.67	10.45	53.7	24.68	6.41	23	19.44	11.76	14.06	48.17	3.66	20.59	18.18	10.53	15.19	19.51	13.68	3.57	1.92	5.26	8.33	9.84	7.69	11.9	8.2	5.88	5.56	0	3.45	4.26	2.33	2.56
300	25	16.5	14.77	14.29	10.81	27.75	23.23	21.17	16.3	20.56	16.51	19.05	17.29	6.25	20.73	9.46	3.64	16.67	10.45	54.32	24.68	7.69	23	20.83	11.76	14.06	49.39	3.66	22.35	18.18	10.53	17.72	20.73	14.74	7.14	1.92	5.26	8.33	9.84	7.69	11.9	8.2	5.88	5.56	0	3.45	4.26	2.33	2.56
320	25	16.5	15.91	14.29	13.51	28.8	23.87	22.63	18.48	21.5	18.35	19.05	18.05	7.81	24.39	9.46	5.45	16.67	11.94	55.56	25.97	8.97	23	20.83	13.73	15.63	51.83	6.1	23.53	18.18	12.28	17.72	20.73	14.74	7.14	1.92	5.26	9.72	9.84	7.69	11.9	9.84	5.88	5.56	0	3.45	4.26	2.33	2.56
340	26.32	19.42	17.05	14.29	14.86	30.37	24.52	23.36	18.48	23.36	22.02	20.63	19.55	9.38	26.83	10.81	5.45	18.52	11.94	56.79	27.27	8.97	24	20.83	13.73	15.63	52.44	6.1	27.65	18.18	12.28	18.99	21.95	15.79	8.93	1.92	5.26	12.5	11.48	7.69	11.9	11.48	5.88	5.56	3.85	3.45	6.38	2.33	2.56
360	28.95	23.3	18.18	14.29	14.86	32.98	26.45	24.09	19.57	24.3	22.02	25.4	19.55	12.5	26.83	10.81	5.45	20.37	11.94	58.64	28.57	8.97	27	22.22	13.73	17.19	54.27	6.1	29.41	18.18	12.28	18.99	24.39	16.84	8.93	1.92	6.58	12.5	11.48	7.69	14.29	13.11	5.88	5.56	7.69	3.45	6.38	2.33	2.56
380	30.26	23.3	20.45	14.29	17.57	35.08	26.45	24.09	20.65	25.23	22.94	25.4	19.55	12.5	28.05	10.81	5.45	22.22	11.94	59.88	28.57	11.54	27	25	13.73	17.19	54.27	6.1	30.59	19.32	12.28	21.52	24.39	18.95	8.93	1.92	9.21	12.5	11.48	7.69	16.67	13.11	5.88	5.56	7.69	3.45	6.38	2.33	2.56
400	30.26	26.21	21.59	16.67	17.57	35.6	27.1	25.55	21.74	26.17	24.77	25.4	20.3	14.06	29.27	10.81	7.27	24.07	13.43	59.88	28.57	11.54	27	26.39	13.73	17.19	55.49	7.32	30.59	21.59	12.28	21.52	24.39	21.05	8.93	1.92	10.53	13.89	11.48	7.69	16.67	16.39	5.88	8.33	7.69	3.45	6.38	2.33	5.13
420	31.58	26.21	22.73	17.86	17.57	36.65	29.03	26.28	21.74	26.17	26.61	25.4	20.3	14.06	30.49	12.16	7.27	24.07	13.43	59.88	28.57	11.54	29	27.78	13.73	17.19	56.1	8.54	31.76	26.14	12.28	21.52	28.05	22.11	8.93	1.92	10.53	15.28	13.11	7.69	16.67	19.67	5.88	8.33	7.69	3.45	6.38	2.33	7.69
440	33.55	26.21	23.86	19.05	18.92	37.7	30.32	27.74	22.83	27.1	26.61	28.57	20.3	14.06	30.49	12.16	9.09	24.07	13.43	60.49	29.87	11.54	30	30.56	13.73	17.19	57.93	9.76	35.88	27.27	12.28	22.78	29.27	23.16	8.93	3.85	10.53	15.28	14.75	7.69	16.67	22.95	5.88	8.33	7.69	3.45	6.38	2.33	7.69
460	34.87	26.21	25	20.24	18.92	38.74	31.61	30.66	25	28.97	26.61	28.57	21.8	14.06	30.49	12.16	9.09	24.07	16.42	62.35	29.87	11.54	31	31.94	13.73	17.19	57.93	9.76	37.06	28.41	14.04	22.78	31.71	23.16	8.93	3.85	10.53	15.28	16.39	7.69	19.05	22.95	5.88	8.33	7.69	3.45	8.51	2.33	7.69
480	36.84	28.16	25	20.24	20.27	39.79	33.55	32.12	25	28.97	27.52	30.16	23.31	14.06	30.49	13.51	9.09	25.93	16.42	62.35	29.87	11.54	32	31.94	13.73	17.19	59.15	9.76	39.41	30.68	14.04	22.78	31.71	25.26	8.93	3.85	13.16	15.28	16.39	7.69	19.05	22.95	5.88	8.33	7.69	3.45	10.64	2.33	7.69
500	37.5	30.1	25	20.24	20.27	41.88	35.48	32.12	26.09	30.84	28.44	30.16	24.06	14.06	30.49	16.22	10.91	25.93	17.91	62.35	29.87	11.54	35	31.94	15.69	17.19	60.37	12.2	40.59	34.09	14.04	24.05	31.71	26.32	10.71	5.77	13.16	16.67	16.39	7.69	19.05	22.95	5.88	8.33	7.69	3.45	10.64	2.33	7.69
520	38.16	30.1	25	21.43	20.27	42.93	36.77	34.31	27.17	30.84	29.36	31.75	25.56	14.06	31.71	17.57	10.91	27.78	17.91	62.35	32.47	12.82	35	33.33	15.69	18.75	60.98	13.41	40.59	34.09	14.04	24.05	31.71	26.32	12.5	5.77	13.16	16.67	16.39	10.26	19.05	24.59	5.88	8.33	7.69	6.9	10.64	2.33	7.69
540	38.16	31.07	27.27	21.43	20.27	43.46	37.42	34.31	27.17	30.84	32.11	31.75	28.57	14.06	31.71	17.57	10.91	29.63	17.91	62.96	33.77	15.38	36	34.72	15.69	20.31	60.98	13.41	41.76	34.09	15.79	25.32	31.71	26.32	12.5	5.77	13.16	18.06	19.67	10.26	19.05	24.59	5.88	8.33	11.54	6.9	10.64	2.33	7.69
560	38.16	32.04	29.55	22.62	21.62	44.5	37.42	34.31	27.17	30.84	33.94	31.75	30.08	14.06	35.37	17.57	10.91	29.63	20.9	62.96	33.77	15.38	36	34.72	15.69	20.31	60.98	13.41	42.35	35.23	15.79	25.32	32.93	28.42	12.5	7.69	14.47	19.44	19.67	12.82	19.05	24.59	5.88	8.33	11.54	6.9	10.64	2.33	7.69
580	38.82	32.04	29.55	25	21.62	45.03	40.65	34.31	29.35	31.78	34.86	31.75	30.83	14.06	37.8	18.92	12.73	29.63	22.39	62.96	33.77	15.38	39	34.72	15.69	21.88	61.59	13.41	42.35	35.23	17.54	25.32	32.93	28.42	12.5	7.69	14.47	22.22	19.67	12.82	19.05	24.59	5.88	8.33	11.54	6.9	10.64	4.65	7.69
600	39.47	33.01	31.82	28.57	22.97	46.07	42.58	36.5	29.35	33.64	35.78	33.33	33.08	15.63	37.8	22.97	14.55	29.63	22.39	62.96	33.77	16.67	40	34.72	15.69	21.88	61.59	14.63	42.94	35.23	17.54	26.58	32.93	28.42	12.5	7.69	15.79	22.22	19.67	12.82	19.05	26.23	5.88	8.33	11.54	6.9	12.77	4.65	10.26
620	40.13	33.01	31.82	28.57	22.97	46.6	43.87	39.42	29.35	33.64	36.7	33.33	33.08	15.63	40.24	22.97	16.36	29.63	22.39	64.81	33.77	16.67	40	36.11	17.65	21.88	61.59	17.07	44.12	36.36	19.3	30.38	32.93	31.58	12.5	7.69	15.79	22.22	19.67	12.82	19.05	26.23	5.88	8.33	11.54	6.9	12.77	6.98	10.26
640	41.45	33.01	32.95	29.76	22.97	47.12	45.16	41.61	29.35	33.64	37.61	33.33	33.83	15.63	40.24	27.03	18.18	29.63	23.88	64.81	35.06	16.67	42	36.11	19.61	21.88	61.59	17.07	45.29	37.5	19.3	30.38	34.15	31.58	14.29	11.54	17.11	25	19.67	12.82	19.05	26.23	5.88	11.11	11.54	6.9	12.77	6.98	10.26
660	41.45	33.01	32.95	29.76	22.97	48.69	46.45	43.07	29.35	34.58	37.61	33.33	34.59	18.75	42.68	28.38	20	29.63	25.37	66.05	35.06	19.23	42	36.11	19.61	23.44	62.8	17.07	46.47	38.64	19.3	30.38	34.15	32.63	14.29	11.54	17.11	25	19.67	12.82	21.43	26.23	5.88	11.11	11.54	6.9	12.77	6.98	10.26
680	42.11	33.01	34.09	30.95	22.97	49.74	47.74	44.53	30.43	34.58	37.61	33.33	35.34	18.75	42.68	28.38	25.45	29.63	25.37	66.05	37.66	21.79	45	37.5	19.61	26.56	62.8	17.07	48.24	40.91	19.3	31.65	34.15	33.68	19.64	11.54	17.11	25	19.67	12.82	21.43	27.87	5.88	11.11	11.54	6.9	12.77	9.3	10.26
700	44.74	33.01	35.23	30.95	22.97	50.79	49.03	44.53	31.52	37.38	38.53	33.33	36.84	18.75	43.9	28.38	25.45	29.63	26.87	66.05	38.96	21.79	46	37.5	19.61	29.69	62.8	18.29	51.18	40.91	19.3	31.65	34.15	33.68	21.43	13.46	18.42	25	21.31	12.82	21.43	27.87	5.88	11.11	11.54	6.9	12.77	9.3	10.26
720	44.74	34.95	38.64	30.95	24.32	51.83	49.03	45.26	33.7	38.32	38.53	33.33	37.59	20.31	43.9	29.73	25.45	29.63	26.87	66.67	38.96	23.08	46	37.5	19.61	29.69	63.41	19.51	52.94	43.18	19.3	31.65	34.15	33.68	21.43	13.46	19.74	25	21.31	15.38	21.43	29.51	5.88	11.11	11.54	6.9	12.77	9.3	15.38
740	46.05	35.92	40.91	32.14	24.32	52.88	49.03	45.99	34.78	40.19	38.53	33.33	37.59	20.31	43.9	29.73	25.45	29.63	28.36	66.67	38.96	23.08	46	37.5	19.61	29.69	64.02	19.51	53.53	44.32	19.3	32.91	34.15	35.79	21.43	13.46	19.74	25	21.31	15.38	21.43	29.51	8.82	11.11	11.54	6.9	12.77	9.3	15.38
760	46.71	35.92	40.91	32.14	24.32	54.45	50.32	45.99	36.96	40.19	39.45	34.92	37.59	20.31	43.9	31.08	29.09	29.63	28.36	66.67	38.96	23.08	47	37.5	19.61	29.69	65.24	19.51	54.71	45.45	19.3	34.18	35.37	37.89	21.43	13.46	21.05	25	21.31	17.95	21.43	31.15	8.82	11.11	15.38	6.9	12.77	9.3	15.38
780	46.71	35.92	43.18	32.14	24.32	54.97	51.61	46.72	38.04	40.19	39.45	36.51	37.59	20.31	43.9	31.08	30.91	31.48	28.36	66.67	40.26	23.08	47	37.5	19.61	31.25	65.85	19.51	54.71	46.59	19.3	35.44	35.37	38.95	23.21	13.46	22.37	25	21.31	17.95	23.81	31.15	11.76	11.11	15.38	6.9	14.89	9.3	15.38
800	46.71	36.89	43.18	32.14	24.32	55.5	51.61	47.45	40.22	41.12	41.28	36.51	37.59	20.31	43.9	31.08	30.91	31.48	28.36	67.28	40.26	23.08	47	37.5	19.61	32.81	65.85	20.73	55.29	47.73	19.3	35.44	36.59	40	23.21	15.38	22.37	25	21.31	17.95	23.81	32.79	11.76	11.11	15.38	6.9	17.02	9.3	15.38
820	47.37	36.89	44.32	33.33	24.32	56.54	53.55	48.91	41.3	41.12	43.12	38.1	39.85	20.31	43.9	31.08	30.91	31.48	28.36	67.28	40.26	23.08	47	38.89	19.61	32.81	65.85	21.95	56.47	47.73	19.3	35.44	36.59	40	23.21	15.38	22.37	27.78	21.31	17.95	26.19	32.79	11.76	11.11	15.38	10.34	17.02	9.3	15.38
840	48.68	36.89	44.32	33.33	24.32	57.07	55.48	49.64	41.3	42.06	44.95	38.1	40.6	20.31	43.9	31.08	30.91	31.48	29.85	67.9	40.26	25.64	47	38.89	19.61	37.5	65.85	21.95	57.06	50	21.05	35.44	36.59	40	23.21	17.31	22.37	27.78	21.31	17.95	26.19	36.07	11.76	11.11	15.38	10.34	19.15	9.3	15.38
860	50.66	36.89	45.45	33.33	25.68	57.59	55.48	50.36	41.3	42.99	44.95	38.1	40.6	21.88	43.9	31.08	30.91	37.04	29.85	67.9	41.56	26.92	48	38.89	19.61	39.06	65.85	21.95	58.24	51.14	22.81	35.44	36.59	41.05	23.21	17.31	22.37	27.78	21.31	20.51	26.19	39.34	11.76	11.11	15.38	10.34	19.15	9.3	15.38
880	51.97	36.89	46.59	34.52	27.03	57.59	56.13	50.36	41.3	42.99	45.87	38.1	41.35	23.44	43.9	31.08	30.91	37.04	29.85	68.52	41.56	29.49	48	38.89	19.61	39.06	65.85	23.17	58.82	53.41	22.81	35.44	37.8	42.11	28.57	17.31	22.37	27.78	21.31	20.51	26.19	40.98	14.71	11.11	15.38	17.24	19.15	9.3	15.38
900	52.63	37.86	46.59	34.52	28.38	58.64	57.42	50.36	43.48	42.99	46.79	38.1	42.86	25	43.9	31.08	30.91	38.89	29.85	68.52	42.86	30.77	48	38.89	21.57	39.06	67.07	23.17	60	54.55	22.81	35.44	39.02	44.21	28.57	19.23	22.37	29.17	21.31	20.51	26.19	40.98	14.71	11.11	19.23	17.24	19.15	9.3	15.38
920	53.29	38.83	47.73	34.52	31.08	59.16	57.42	50.36	43.48	43.93	47.71	38.1	42.86	25	45.12	31.08	34.55	40.74	29.85	68.52	42.86	32.05	49	38.89	21.57	39.06	67.68	25.61	61.76	54.55	24.56	35.44	39.02	44.21	28.57	19.23	22.37	29.17	21.31	20.51	26.19	42.62	14.71	11.11	19.23	20.69	19.15	9.3	17.95
940	53.29	39.81	47.73	36.9	31.08	59.16	57.42	50.36	43.48	45.79	47.71	38.1	42.86	26.56	46.34	31.08	34.55	40.74	29.85	68.52	42.86	32.05	49	38.89	21.57	39.06	68.9	25.61	62.94	55.68	26.32	36.71	39.02	46.32	32.14	19.23	23.68	30.56	24.59	20.51	26.19	42.62	14.71	16.67	23.08	20.69	19.15	9.3	17.95
960	53.29	39.81	47.73	36.9	32.43	59.16	57.42	51.82	43.48	46.73	49.54	38.1	43.61	26.56	47.56	32.43	34.55	44.44	32.84	69.14	44.16	32.05	49	40.28	21.57	40.63	68.9	25.61	62.94	55.68	26.32	36.71	39.02	46.32	32.14	19.23	23.68	30.56	26.23	20.51	26.19	42.62	14.71	16.67	23.08	20.69	21.28	11.63	17.95
980	53.95	40.78	47.73	36.9	33.78	59.69	57.42	51.82	43.48	47.66	50.46	38.1	43.61	29.69	48.78	33.78	36.36	44.44	32.84	69.75	44.16	32.05	49	40.28	21.57	42.19	68.9	28.05	64.12	55.68	26.32	36.71	41.46	46.32	32.14	19.23	25	31.94	27.87	20.51	26.19	42.62	17.65	16.67	26.92	20.69	23.4	13.95	17.95
1000	53.95	40.78	47.73	38.1	35.14	60.21	58.06	51.82	43.48	47.66	51.38	41.27	45.11	29.69	48.78	33.78	36.36	44.44	35.82	69.75	48.05	32.05	50	40.28	21.57	42.19	70.12	29.27	64.71	55.68	28.07	37.97	42.68	46.32	33.93	23.08	25	31.94	27.87	20.51	26.19	44.26	17.65	16.67	30.77	20.69	25.53	13.95	17.95
1020	54.61	42.72	47.73	39.29	35.14	61.26	58.71	51.82	43.48	48.6	52.29	42.86	45.11	29.69	50	33.78	36.36	44.44	35.82	70.99	48.05	33.33	50	40.28	21.57	42.19	70.73	29.27	66.47	56.82	29.82	39.24	42.68	46.32	33.93	23.08	27.63	33.33	29.51	20.51	26.19	45.9	17.65	16.67	30.77	20.69	25.53	13.95	17.95
1040	54.61	43.69	47.73	40.48	36.49	62.83	59.35	53.28	44.57	49.53	52.29	42.86	46.62	31.25	50	35.14	36.36	44.44	35.82	71.6	48.05	33.33	50	41.67	21.57	42.19	71.34	29.27	66.47	57.95	29.82	40.51	43.9	47.37	33.93	23.08	28.95	33.33	31.15	20.51	26.19	45.9	17.65	16.67	30.77	20.69	25.53	13.95	17.95
1060	54.61	44.66	47.73	40.48	36.49	63.35	59.35	53.28	46.74	49.53	54.13	42.86	49.62	31.25	50	35.14	38.18	44.44	37.31	72.84	48.05	33.33	52	43.06	21.57	42.19	71.34	30.49	67.06	59.09	29.82	40.51	43.9	48.42	33.93	23.08	30.26	34.72	31.15	20.51	26.19	45.9	17.65	16.67	30.77	24.14	25.53	13.95	17.95
1080	55.92	47.57	47.73	40.48	36.49	64.92	61.29	55.47	47.83	49.53	55.05	44.44	49.62	31.25	51.22	35.14	41.82	44.44	37.31	72.84	48.05	34.62	52	43.06	23.53	42.19	71.34	30.49	67.06	60.23	29.82	43.04	45.12	48.42	33.93	23.08	30.26	36.11	31.15	20.51	26.19	47.54	17.65	19.44	30.77	24.14	25.53	13.95	17.95
1100	57.89	47.57	47.73	40.48	37.84	65.45	61.94	55.47	47.83	51.4	55.05	46.03	50.38	31.25	52.44	36.49	41.82	44.44	37.31	72.84	48.05	34.62	52	43.06	23.53	42.19	71.34	30.49	67.65	60.23	29.82	45.57	46.34	48.42	33.93	23.08	34.21	36.11	31.15	20.51	28.57	47.54	17.65	19.44	30.77	24.14	25.53	16.28	20.51
1120	57.89	48.54	48.86	41.67	37.84	66.49	63.23	56.2	48.91	51.4	56.88	46.03	51.88	32.81	52.44	36.49	43.64	44.44	37.31	72.84	48.05	34.62	52	43.06	23.53	42.19	71.34	30.49	68.24	60.23	29.82	45.57	46.34	49.47	33.93	23.08	35.53	36.11	32.79	20.51	28.57	47.54	20.59	19.44	30.77	24.14	25.53	16.28	20.51
1140	57.89	48.54	50	42.86	37.84	67.02	63.23	56.2	48.91	52.34	56.88	47.62	51.88	32.81	52.44	36.49	43.64	44.44	37.31	73.46	49.35	35.9	52	43.06	23.53	42.19	71.34	30.49	68.82	61.36	29.82	45.57	46.34	49.47	33.93	23.08	35.53	36.11	32.79	20.51	28.57	49.18	20.59	19.44	30.77	24.14	25.53	16.28	20.51
1160	58.55	48.54	51.14	42.86	37.84	67.02	63.87	56.2	48.91	52.34	57.8	47.62	51.88	32.81	52.44	36.49	43.64	46.3	37.31	73.46	50.65	37.18	53	43.06	23.53	42.19	71.95	31.71	70	61.36	29.82	46.84	47.56	50.53	33.93	25	35.53	36.11	32.79	20.51	28.57	50.82	20.59	19.44	30.77	24.14	29.79	16.28	20.51
1180	60.53	48.54	51.14	42.86	37.84	68.06	63.87	57.66	50	52.34	57.8	47.62	52.63	32.81	52.44	36.49	45.45	46.3	37.31	73.46	50.65	39.74	53	43.06	23.53	42.19	71.95	35.37	70	61.36	31.58	46.84	47.56	50.53	35.71	25	36.84	36.11	32.79	20.51	28.57	50.82	20.59	19.44	30.77	24.14	29.79	16.28	20.51
1200	60.53	48.54	51.14	42.86	37.84	69.11	63.87	58.39	51.09	52.34	59.63	47.62	52.63	32.81	52.44	36.49	45.45	46.3	37.31	74.69	50.65	39.74	53	43.06	25.49	42.19	72.56	36.59	70	61.36	31.58	46.84	50	51.58	35.71	25	38.16	36.11	32.79	20.51	28.57	50.82	20.59	19.44	30.77	24.14	29.79	16.28	20.51
1220	62.5	48.54	52.27	45.24	41.89	69.63	65.16	59.12	52.17	52.34	60.55	47.62	53.38	32.81	52.44	36.49	47.27	46.3	38.81	74.69	50.65	39.74	53	44.44	25.49	42.19	72.56	39.02	70	61.36	31.58	46.84	50	51.58	37.5	26.92	39.47	37.5	32.79	20.51	28.57	50.82	20.59	19.44	34.62	24.14	29.79	16.28	20.51
1240	63.16	48.54	53.41	45.24	41.89	69.63	65.16	60.58	52.17	52.34	62.39	47.62	53.38	32.81	52.44	36.49	47.27	46.3	38.81	74.69	50.65	39.74	54	44.44	27.45	42.19	73.17	39.02	70	62.5	31.58	46.84	50	51.58	37.5	26.92	40.79	37.5	32.79	20.51	28.57	50.82	20.59	19.44	34.62	24.14	29.79	16.28	20.51
1260	63.16	49.51	53.41	47.62	43.24	69.63	65.16	62.04	52.17	53.27	63.3	52.38	54.14	34.38	52.44	37.84	47.27	46.3	38.81	75.31	50.65	39.74	54	44.44	27.45	42.19	74.39	41.46	71.18	62.5	31.58	48.1	50	52.63	37.5	26.92	40.79	37.5	32.79	20.51	28.57	50.82	20.59	19.44	34.62	24.14	29.79	16.28	20.51
1280	64.47	51.46	54.55	48.81	43.24	70.16	65.81	62.77	52.17	54.21	64.22	53.97	54.89	34.38	52.44	37.84	47.27	46.3	40.3	75.93	50.65	39.74	55	44.44	29.41	43.75	74.39	41.46	71.76	62.5	31.58	48.1	51.22	53.68	37.5	28.85	43.42	37.5	32.79	20.51	28.57	50.82	20.59	19.44	34.62	24.14	31.91	16.28	20.51
1300	65.79	52.43	54.55	48.81	44.59	71.2	65.81	63.5	52.17	54.21	64.22	53.97	56.39	34.38	53.66	37.84	49.09	48.15	40.3	75.93	50.65	39.74	56	45.83	29.41	48.44	74.39	42.68	72.94	62.5	31.58	49.37	51.22	53.68	37.5	28.85	43.42	38.89	32.79	20.51	28.57	50.82	20.59	19.44	34.62	24.14	31.91	16.28	20.51
1320	66.45	52.43	55.68	50	44.59	72.25	65.81	63.5	54.35	55.14	64.22	53.97	57.89	35.94	53.66	37.84	49.09	48.15	40.3	75.93	50.65	39.74	56	45.83	29.41	48.44	74.39	42.68	72.94	62.5	33.33	49.37	51.22	54.74	37.5	28.85	44.74	40.28	32.79	20.51	28.57	50.82	20.59	19.44	34.62	24.14	31.91	16.28	20.51
1340	67.76	52.43	56.82	50	44.59	72.77	67.1	63.5	54.35	55.14	66.06	53.97	59.4	37.5	53.66	37.84	49.09	48.15	40.3	75.93	50.65	39.74	57	48.61	29.41	48.44	74.39	42.68	74.71	63.64	33.33	53.16	51.22	54.74	39.29	30.77	44.74	40.28	32.79	20.51	28.57	50.82	20.59	19.44	34.62	24.14	31.91	18.6	20.51
1360	67.76	53.4	56.82	50	44.59	73.3	68.39	64.23	54.35	55.14	66.06	55.56	60.9	37.5	54.88	37.84	49.09	48.15	40.3	76.54	50.65	39.74	58	50	29.41	48.44	74.39	43.9	74.71	63.64	33.33	53.16	51.22	54.74	39.29	30.77	46.05	40.28	32.79	23.08	28.57	50.82	20.59	19.44	34.62	24.14	34.04	18.6	20.51
1380	68.42	53.4	56.82	50	44.59	73.82	68.39	64.96	54.35	56.07	66.06	55.56	62.41	39.06	54.88	39.19	49.09	48.15	40.3	77.16	50.65	39.74	58	50	29.41	48.44	74.39	45.12	75.29	63.64	33.33	54.43	51.22	54.74	39.29	30.77	46.05	40.28	32.79	23.08	28.57	50.82	20.59	19.44	38.46	24.14	34.04	18.6	23.08
1400	69.08	54.37	57.95	50	47.3	73.82	70.32	65.69	54.35	56.07	66.06	55.56	62.41	39.06	54.88	39.19	49.09	48.15	40.3	77.78	50.65	39.74	58	50	29.41	48.44	76.22	45.12	75.29	67.05	35.09	55.7	51.22	54.74	39.29	32.69	46.05	43.06	32.79	23.08	30.95	50.82	20.59	19.44	38.46	24.14	34.04	18.6	23.08
1420	69.74	54.37	60.23	50	47.3	74.35	70.32	66.42	55.43	57.01	66.97	55.56	62.41	40.63	56.1	40.54	50.91	48.15	40.3	77.78	50.65	41.03	60	50	31.37	48.44	76.83	46.34	75.88	67.05	35.09	55.7	51.22	54.74	39.29	32.69	46.05	43.06	32.79	25.64	30.95	52.46	20.59	22.22	38.46	24.14	34.04	18.6	23.08
1440	70.39	56.31	60.23	50	47.3	75.92	70.97	66.42	55.43	57.94	68.81	55.56	62.41	40.63	56.1	40.54	50.91	48.15	40.3	77.78	50.65	41.03	60	50	33.33	50	77.44	46.34	76.47	67.05	35.09	55.7	54.88	54.74	39.29	34.62	46.05	43.06	34.43	25.64	30.95	52.46	23.53	22.22	38.46	24.14	34.04	18.6	23.08
1460	71.05	56.31	60.23	51.19	51.35	76.96	71.61	67.88	55.43	57.94	68.81	55.56	63.16	40.63	56.1	40.54	52.73	50	41.79	77.78	50.65	42.31	61	50	33.33	50	77.44	46.34	77.06	67.05	35.09	55.7	54.88	55.79	39.29	34.62	47.37	44.44	36.07	25.64	30.95	52.46	23.53	22.22	38.46	24.14	34.04	18.6	23.08
1480	71.05	57.28	60.23	51.19	51.35	78.01	73.55	67.88	56.52	57.94	68.81	55.56	64.66	42.19	56.1	40.54	54.55	50	46.27	78.4	50.65	42.31	61	51.39	33.33	51.56	78.05	46.34	77.06	68.18	35.09	55.7	56.1	55.79	39.29	34.62	48.68	44.44	36.07	25.64	30.95	52.46	23.53	25	42.31	24.14	36.17	18.6	23.08
1500	71.71	58.25	60.23	51.19	51.35	78.53	74.19	68.61	56.52	59.81	68.81	55.56	64.66	42.19	56.1	40.54	54.55	50	46.27	78.4	50.65	43.59	61	51.39	33.33	51.56	78.05	46.34	77.65	68.18	35.09	56.96	57.32	55.79	39.29	36.54	48.68	44.44	36.07	25.64	30.95	52.46	23.53	25	42.31	24.14	36.17	18.6	23.08
1520	71.71	60.19	60.23	51.19	51.35	79.58	74.84	68.61	58.7	59.81	68.81	55.56	66.17	42.19	56.1	40.54	54.55	50	47.76	78.4	50.65	44.87	62	51.39	33.33	51.56	79.27	47.56	77.65	68.18	35.09	56.96	58.54	56.84	39.29	36.54	48.68	45.83	36.07	25.64	30.95	52.46	23.53	27.78	42.31	24.14	36.17	20.93	23.08
1540	71.71	62.14	60.23	51.19	52.7	80.1	76.77	69.34	59.78	59.81	70.64	57.14	66.92	42.19	56.1	41.89	54.55	50	47.76	79.01	50.65	46.15	63	51.39	33.33	53.13	79.27	47.56	78.24	69.32	40.35	56.96	58.54	56.84	39.29	36.54	50	45.83	36.07	25.64	30.95	52.46	23.53	27.78	42.31	24.14	38.3	20.93	23.08
1560	72.37	62.14	60.23	51.19	52.7	80.1	78.06	69.34	60.87	59.81	70.64	57.14	66.92	42.19	56.1	43.24	54.55	50	47.76	79.01	50.65	46.15	63	52.78	33.33	53.13	79.27	47.56	78.24	71.59	43.86	56.96	59.76	56.84	39.29	36.54	50	45.83	37.7	25.64	30.95	52.46	23.53	27.78	42.31	24.14	38.3	20.93	23.08
1580	73.03	62.14	61.36	51.19	52.7	80.63	78.71	69.34	60.87	60.75	70.64	57.14	66.92	42.19	56.1	43.24	54.55	50	47.76	79.01	50.65	47.44	63	52.78	33.33	53.13	79.27	48.78	78.24	71.59	43.86	58.23	59.76	56.84	41.07	36.54	52.63	45.83	37.7	25.64	30.95	52.46	23.53	27.78	42.31	24.14	40.43	20.93	23.08
1600	73.03	64.08	62.5	51.19	52.7	80.63	78.71	69.34	61.96	60.75	70.64	57.14	66.92	43.75	56.1	45.95	54.55	50	47.76	79.01	50.65	47.44	64	52.78	35.29	53.13	79.88	48.78	78.24	71.59	43.86	58.23	60.98	57.89	41.07	36.54	52.63	45.83	39.34	25.64	30.95	52.46	23.53	27.78	42.31	24.14	42.55	20.93	23.08
1620	73.68	64.08	62.5	52.38	52.7	81.15	78.71	70.8	61.96	61.68	70.64	57.14	67.67	45.31	56.1	45.95	54.55	50	49.25	79.01	50.65	47.44	65	52.78	35.29	53.13	80.49	50	78.82	72.73	43.86	58.23	60.98	58.95	41.07	36.54	52.63	45.83	40.98	25.64	30.95	52.46	23.53	27.78	42.31	24.14	42.55	20.93	23.08
1640	73.68	64.08	62.5	53.57	52.7	81.68	79.35	71.53	61.96	61.68	70.64	57.14	69.17	45.31	57.32	47.3	54.55	50	49.25	79.63	53.25	48.72	65	52.78	35.29	53.13	80.49	50	78.82	72.73	43.86	58.23	60.98	58.95	41.07	36.54	53.95	45.83	40.98	25.64	30.95	52.46	23.53	27.78	42.31	24.14	42.55	20.93	23.08
1660	73.68	64.08	62.5	53.57	52.7	82.2	79.35	72.26	64.13	61.68	71.56	57.14	69.92	46.88	59.76	47.3	54.55	50	49.25	79.63	53.25	48.72	66	52.78	37.25	53.13	81.1	50	79.41	72.73	43.86	58.23	60.98	58.95	44.64	36.54	53.95	45.83	40.98	25.64	30.95	54.1	23.53	27.78	42.31	24.14	42.55	20.93	23.08
1680	73.68	64.08	62.5	55.95	52.7	82.2	80.65	72.26	64.13	61.68	71.56	58.73	70.68	48.44	59.76	47.3	54.55	50	49.25	79.63	53.25	48.72	66	52.78	37.25	53.13	81.1	50	80.59	73.86	43.86	58.23	60.98	58.95	48.21	38.46	53.95	45.83	40.98	25.64	30.95	54.1	26.47	27.78	42.31	24.14	44.68	23.26	23.08
1700	74.34	64.08	63.64	57.14	54.05	82.72	81.29	72.99	64.13	61.68	72.48	58.73	71.43	48.44	59.76	47.3	54.55	50	50.75	79.63	53.25	48.72	66	52.78	37.25	53.13	81.1	50	81.18	73.86	45.61	59.49	60.98	60	48.21	40.38	56.58	45.83	40.98	25.64	30.95	55.74	26.47	30.56	42.31	24.14	44.68	23.26	23.08
1720	76.32	64.08	63.64	57.14	56.76	83.25	81.29	73.72	64.13	61.68	72.48	58.73	72.18	50	59.76	47.3	54.55	50	50.75	80.25	53.25	50	67	52.78	37.25	53.13	81.1	51.22	81.76	73.86	45.61	60.76	60.98	60	48.21	40.38	56.58	45.83	40.98	25.64	33.33	55.74	26.47	30.56	42.31	24.14	44.68	23.26	23.08
1740	76.32	64.08	63.64	58.33	56.76	83.25	81.29	73.72	64.13	62.62	72.48	58.73	72.18	50	59.76	48.65	54.55	50	52.24	80.25	53.25	50	67	52.78	39.22	53.13	81.1	51.22	81.76	73.86	45.61	60.76	60.98	60	48.21	40.38	59.21	45.83	40.98	28.21	33.33	57.38	26.47	30.56	42.31	27.59	44.68	23.26	23.08
1760	77.63	64.08	63.64	58.33	56.76	83.25	81.29	73.72	64.13	62.62	73.39	60.32	72.18	50	59.76	48.65	54.55	50	53.73	80.25	54.55	50	67	52.78	39.22	53.13	81.1	51.22	81.76	73.86	49.12	60.76	60.98	63.16	48.21	40.38	59.21	45.83	44.26	30.77	33.33	57.38	26.47	30.56	42.31	27.59	44.68	23.26	23.08
1780	78.29	66.02	63.64	58.33	56.76	83.77	81.29	74.45	64.13	62.62	73.39	60.32	72.18	50	59.76	48.65	56.36	50	55.22	80.25	54.55	50	67	52.78	39.22	53.13	81.1	51.22	81.76	73.86	49.12	60.76	62.2	63.16	48.21	40.38	60.53	45.83	45.9	30.77	33.33	57.38	26.47	30.56	42.31	27.59	44.68	23.26	23.08
1800	79.61	66.02	63.64	58.33	56.76	83.77	81.94	74.45	65.22	62.62	73.39	60.32	72.18	50	60.98	48.65	56.36	50	55.22	80.86	54.55	50	67	52.78	39.22	54.69	81.1	51.22	81.76	73.86	49.12	62.03	62.2	64.21	48.21	40.38	60.53	45.83	45.9	30.77	33.33	57.38	26.47	30.56	42.31	27.59	44.68	23.26	23.08
1820	79.61	68.93	63.64	58.33	56.76	83.77	81.94	74.45	65.22	64.49	73.39	60.32	72.18	50	60.98	48.65	56.36	50	55.22	80.86	54.55	50	67	52.78	39.22	54.69	81.1	51.22	81.76	73.86	49.12	62.03	62.2	66.32	50	40.38	60.53	45.83	45.9	30.77	33.33	57.38	26.47	30.56	42.31	27.59	44.68	23.26	23.08
1840	80.26	68.93	63.64	59.52	56.76	84.82	81.94	74.45	65.22	65.42	73.39	60.32	72.18	50	62.2	51.35	56.36	51.85	55.22	80.86	54.55	51.28	68	52.78	39.22	54.69	81.1	51.22	81.76	73.86	49.12	63.29	62.2	67.37	50	40.38	60.53	45.83	45.9	30.77	33.33	57.38	26.47	30.56	42.31	27.59	44.68	23.26	25.64
1860	80.26	68.93	63.64	60.71	56.76	84.82	81.94	74.45	65.22	65.42	75.23	60.32	74.44	50	62.2	51.35	56.36	51.85	56.72	80.86	54.55	51.28	68	52.78	39.22	54.69	81.71	52.44	82.35	73.86	52.63	63.29	62.2	67.37	50	40.38	60.53	45.83	45.9	30.77	33.33	57.38	26.47	30.56	42.31	27.59	44.68	23.26	25.64
1880	80.26	68.93	63.64	61.9	56.76	85.86	82.58	75.18	65.22	66.36	75.23	61.9	74.44	50	62.2	51.35	56.36	53.7	59.7	81.48	54.55	53.85	68	52.78	39.22	54.69	81.71	52.44	82.94	76.14	52.63	63.29	63.41	67.37	50	40.38	60.53	47.22	47.54	30.77	33.33	57.38	26.47	33.33	42.31	27.59	44.68	25.58	25.64
1900	80.26	68.93	63.64	63.1	56.76	86.39	82.58	76.64	66.3	66.36	75.23	61.9	74.44	51.56	62.2	52.7	56.36	53.7	59.7	81.48	58.44	53.85	68	54.17	39.22	54.69	81.71	53.66	83.53	76.14	52.63	63.29	65.85	68.42	50	40.38	60.53	48.61	47.54	30.77	33.33	57.38	26.47	33.33	42.31	27.59	44.68	25.58	25.64
1920	80.26	68.93	63.64	63.1	56.76	86.39	82.58	76.64	66.3	67.29	75.23	61.9	75.19	51.56	62.2	52.7	56.36	53.7	59.7	81.48	59.74	53.85	69	54.17	39.22	57.81	81.71	56.1	83.53	77.27	52.63	63.29	65.85	68.42	50	40.38	60.53	48.61	49.18	33.33	35.71	57.38	26.47	33.33	42.31	27.59	44.68	27.91	25.64
1940	80.26	68.93	64.77	63.1	56.76	86.39	82.58	77.37	66.3	68.22	75.23	61.9	76.69	53.13	62.2	52.7	56.36	53.7	59.7	81.48	59.74	53.85	69	54.17	39.22	57.81	82.32	56.1	83.53	77.27	52.63	63.29	67.07	69.47	50	40.38	61.84	50	49.18	33.33	35.71	59.02	26.47	33.33	42.31	27.59	46.81	27.91	28.21
1960	80.26	68.93	65.91	63.1	56.76	87.43	82.58	77.37	66.3	69.16	76.15	61.9	78.95	53.13	62.2	52.7	56.36	53.7	61.19	81.48	61.04	53.85	70	54.17	39.22	57.81	82.32	57.32	84.12	77.27	52.63	63.29	67.07	71.58	50	42.31	61.84	51.39	52.46	33.33	35.71	59.02	26.47	33.33	42.31	27.59	48.94	30.23	28.21
1980	80.26	68.93	65.91	63.1	56.76	87.96	82.58	77.37	66.3	69.16	76.15	61.9	78.95	53.13	62.2	54.05	56.36	53.7	61.19	81.48	62.34	56.41	71	55.56	39.22	59.38	82.32	58.54	85.29	78.41	52.63	63.29	68.29	72.63	50	42.31	61.84	51.39	52.46	33.33	35.71	60.66	26.47	33.33	42.31	27.59	48.94	30.23	28.21
2000	80.92	68.93	65.91	63.1	56.76	87.96	82.58	78.1	66.3	69.16	76.15	61.9	78.95	54.69	62.2	54.05	56.36	53.7	61.19	82.1	62.34	57.69	71	55.56	39.22	60.94	82.32	59.76	85.88	78.41	52.63	64.56	68.29	72.63	50	42.31	61.84	52.78	52.46	33.33	35.71	60.66	26.47	33.33	42.31	27.59	48.94	30.23	28.21
2020	80.92	68.93	65.91	64.29	56.76	88.48	82.58	78.1	66.3	70.09	76.15	61.9	79.7	54.69	62.2	54.05	58.18	53.7	62.69	82.1	63.64	57.69	71	55.56	39.22	62.5	82.32	60.98	85.88	79.55	52.63	64.56	69.51	72.63	50	44.23	61.84	52.78	52.46	33.33	35.71	60.66	26.47	36.11	42.31	27.59	51.06	30.23	30.77
2040	82.24	68.93	65.91	65.48	56.76	89.53	83.23	78.1	66.3	71.03	76.15	61.9	80.45	56.25	62.2	55.41	60	53.7	62.69	82.1	63.64	58.97	71	56.94	39.22	62.5	82.32	60.98	87.06	79.55	52.63	64.56	69.51	73.68	50	46.15	63.16	52.78	52.46	33.33	35.71	60.66	26.47	36.11	42.31	27.59	51.06	30.23	30.77
2060	82.89	68.93	65.91	65.48	58.11	89.53	83.23	78.1	66.3	71.03	76.15	61.9	81.2	56.25	63.41	55.41	60	53.7	62.69	82.72	63.64	60.26	71	56.94	39.22	64.06	82.32	60.98	87.06	79.55	52.63	65.82	70.73	73.68	50	46.15	63.16	55.56	52.46	33.33	35.71	62.3	26.47	36.11	42.31	27.59	53.19	30.23	30.77
2080	82.89	69.9	67.05	65.48	58.11	89.53	83.23	78.1	66.3	71.96	76.15	61.9	81.95	57.81	63.41	55.41	60	53.7	64.18	82.72	63.64	60.26	71	56.94	39.22	64.06	82.32	60.98	87.06	80.68	52.63	65.82	70.73	73.68	50	46.15	63.16	56.94	52.46	33.33	35.71	62.3	26.47	36.11	42.31	27.59	53.19	30.23	30.77
2100	82.89	69.9	67.05	65.48	58.11	89.53	83.87	78.83	67.39	72.9	76.15	61.9	81.95	57.81	64.63	55.41	60	53.7	64.18	83.33	64.94	60.26	71	56.94	39.22	64.06	82.32	62.2	87.65	80.68	52.63	67.09	70.73	73.68	50	46.15	65.79	56.94	52.46	33.33	35.71	62.3	26.47	38.89	42.31	27.59	53.19	30.23	30.77
2120	82.89	69.9	67.05	65.48	58.11	89.53	83.87	79.56	68.48	72.9	76.15	61.9	82.71	57.81	64.63	55.41	61.82	53.7	65.67	84.57	64.94	60.26	71	56.94	39.22	64.06	82.32	62.2	87.65	80.68	52.63	67.09	70.73	73.68	50	46.15	67.11	56.94	52.46	33.33	35.71	62.3	29.41	38.89	42.31	27.59	53.19	30.23	30.77
2140	84.87	69.9	67.05	65.48	59.46	89.53	84.52	79.56	69.57	73.83	76.15	61.9	82.71	57.81	64.63	55.41	61.82	55.56	65.67	84.57	64.94	61.54	72	56.94	39.22	64.06	82.32	63.41	87.65	80.68	52.63	68.35	71.95	73.68	50	46.15	68.42	56.94	52.46	33.33	35.71	62.3	29.41	38.89	42.31	27.59	53.19	30.23	30.77
2160	84.87	69.9	67.05	65.48	59.46	89.53	85.16	80.29	69.57	74.77	76.15	61.9	82.71	57.81	65.85	55.41	63.64	55.56	65.67	84.57	64.94	61.54	72	56.94	41.18	64.06	82.32	63.41	88.82	80.68	52.63	68.35	71.95	73.68	50	46.15	68.42	56.94	52.46	33.33	35.71	62.3	29.41	38.89	42.31	27.59	53.19	30.23	33.33
2180	84.87	70.87	67.05	66.67	59.46	89.53	85.16	80.29	69.57	76.64	76.15	61.9	82.71	57.81	65.85	56.76	65.45	55.56	65.67	85.19	64.94	61.54	72	56.94	41.18	64.06	82.32	64.63	88.82	80.68	52.63	68.35	71.95	73.68	51.79	46.15	68.42	56.94	52.46	33.33	35.71	62.3	29.41	38.89	42.31	27.59	53.19	32.56	33.33
2200	84.87	72.82	67.05	67.86	59.46	90.05	85.16	80.29	69.57	76.64	77.06	61.9	82.71	57.81	67.07	56.76	65.45	57.41	65.67	85.19	64.94	61.54	72	56.94	41.18	65.63	82.93	64.63	89.41	80.68	52.63	68.35	71.95	74.74	51.79	46.15	68.42	56.94	52.46	33.33	35.71	62.3	29.41	44.44	42.31	27.59	53.19	32.56	33.33
2220	84.87	72.82	67.05	67.86	59.46	90.05	85.16	80.29	69.57	77.57	77.06	61.9	83.46	57.81	67.07	56.76	65.45	59.26	65.67	85.19	64.94	61.54	72	58.33	41.18	65.63	82.93	65.85	89.41	80.68	52.63	68.35	73.17	74.74	53.57	46.15	68.42	58.33	52.46	33.33	35.71	62.3	29.41	47.22	42.31	27.59	53.19	32.56	35.9
2240	84.87	72.82	67.05	67.86	60.81	90.05	85.81	80.29	69.57	77.57	77.98	63.49	84.21	57.81	67.07	56.76	65.45	59.26	65.67	85.8	64.94	61.54	72	58.33	41.18	65.63	83.54	65.85	89.41	80.68	52.63	69.62	74.39	74.74	53.57	48.08	68.42	58.33	52.46	35.9	35.71	62.3	32.35	47.22	46.15	27.59	53.19	32.56	35.9
2260	85.53	72.82	67.05	67.86	62.16	90.05	85.81	80.29	69.57	78.5	77.98	63.49	84.21	59.38	67.07	58.11	65.45	59.26	67.16	85.8	64.94	62.82	72	58.33	41.18	65.63	84.15	67.07	89.41	80.68	52.63	69.62	74.39	74.74	55.36	48.08	68.42	58.33	52.46	35.9	35.71	62.3	32.35	47.22	46.15	27.59	53.19	32.56	38.46
2280	86.18	72.82	67.05	67.86	62.16	90.05	85.81	80.29	69.57	78.5	78.9	63.49	84.21	59.38	67.07	59.46	65.45	59.26	67.16	86.42	64.94	62.82	72	59.72	41.18	65.63	84.76	67.07	89.41	80.68	54.39	69.62	74.39	75.79	55.36	50	68.42	58.33	52.46	35.9	38.1	62.3	32.35	47.22	46.15	27.59	53.19	32.56	41.03
2300	86.18	73.79	67.05	69.05	62.16	91.62	86.45	81.02	70.65	79.44	78.9	63.49	84.21	59.38	67.07	60.81	65.45	59.26	67.16	86.42	64.94	62.82	73	59.72	41.18	65.63	85.37	67.07	90	81.82	54.39	69.62	74.39	75.79	55.36	50	68.42	59.72	52.46	35.9	38.1	62.3	32.35	47.22	46.15	27.59	53.19	32.56	41.03
2320	86.18	73.79	67.05	69.05	62.16	91.62	86.45	81.02	71.74	79.44	78.9	63.49	84.21	62.5	67.07	62.16	65.45	59.26	67.16	86.42	64.94	62.82	73	59.72	41.18	65.63	85.37	68.29	90.59	81.82	56.14	69.62	74.39	75.79	55.36	50	68.42	61.11	52.46	35.9	38.1	62.3	32.35	47.22	46.15	27.59	53.19	32.56	41.03
2340	86.18	73.79	67.05	69.05	62.16	91.62	87.1	81.02	71.74	80.37	78.9	63.49	84.21	62.5	67.07	62.16	65.45	59.26	67.16	86.42	64.94	62.82	73	61.11	41.18	65.63	85.98	68.29	90.59	81.82	56.14	69.62	74.39	76.84	57.14	50	68.42	61.11	52.46	35.9	38.1	63.93	32.35	47.22	46.15	27.59	53.19	32.56	43.59
2360	86.18	73.79	67.05	70.24	62.16	92.15	87.74	81.75	71.74	80.37	79.82	63.49	84.96	62.5	67.07	62.16	65.45	61.11	67.16	86.42	64.94	64.1	74	61.11	43.14	65.63	85.98	68.29	91.18	81.82	56.14	69.62	75.61	76.84	57.14	50	68.42	62.5	52.46	35.9	38.1	65.57	32.35	47.22	46.15	31.03	53.19	32.56	43.59
2380	86.84	73.79	67.05	70.24	62.16	92.15	87.74	81.75	72.83	80.37	79.82	63.49	84.96	62.5	68.29	62.16	65.45	61.11	67.16	86.42	64.94	64.1	75	61.11	45.1	67.19	85.98	68.29	91.18	81.82	57.89	69.62	76.83	76.84	57.14	51.92	68.42	62.5	52.46	35.9	38.1	65.57	32.35	47.22	46.15	31.03	53.19	32.56	43.59
2400	87.5	73.79	67.05	71.43	62.16	92.67	87.74	81.75	73.91	80.37	79.82	63.49	85.71	64.06	69.51	63.51	65.45	61.11	67.16	86.42	64.94	66.67	75	62.5	47.06	67.19	85.98	68.29	91.18	81.82	57.89	69.62	76.83	76.84	57.14	51.92	68.42	62.5	55.74	35.9	38.1	65.57	32.35	47.22	46.15	31.03	53.19	32.56	43.59
2420	87.5	74.76	67.05	72.62	62.16	92.67	88.39	81.75	73.91	80.37	80.73	63.49	85.71	64.06	70.73	63.51	65.45	61.11	67.16	86.42	64.94	66.67	75	62.5	47.06	67.19	85.98	68.29	91.18	81.82	57.89	69.62	76.83	76.84	57.14	53.85	68.42	62.5	55.74	35.9	38.1	65.57	32.35	47.22	46.15	31.03	53.19	32.56	43.59
2440	88.16	74.76	67.05	72.62	62.16	92.67	88.39	83.21	73.91	80.37	80.73	63.49	85.71	65.63	70.73	63.51	65.45	62.96	67.16	87.04	64.94	66.67	75	62.5	47.06	67.19	85.98	68.29	91.18	81.82	57.89	69.62	76.83	76.84	57.14	53.85	68.42	62.5	55.74	35.9	38.1	65.57	32.35	47.22	46.15	31.03	55.32	32.56	46.15
2460	88.82	74.76	67.05	72.62	62.16	93.19	88.39	83.94	73.91	81.31	80.73	63.49	85.71	65.63	70.73	63.51	65.45	62.96	67.16	87.04	64.94	66.67	75	62.5	47.06	67.19	87.2	69.51	91.18	81.82	57.89	69.62	76.83	76.84	57.14	55.77	68.42	62.5	55.74	35.9	38.1	65.57	32.35	47.22	46.15	31.03	55.32	32.56	46.15
2480	88.82	74.76	67.05	72.62	62.16	93.72	88.39	83.94	75	81.31	80.73	63.49	86.47	65.63	70.73	63.51	65.45	64.81	67.16	87.04	64.94	66.67	75	62.5	49.02	67.19	87.2	69.51	91.18	81.82	57.89	69.62	78.05	76.84	57.14	55.77	68.42	63.89	55.74	35.9	38.1	65.57	32.35	47.22	46.15	31.03	55.32	32.56	46.15
2500	89.47	74.76	67.05	72.62	62.16	93.72	88.39	84.67	76.09	81.31	80.73	63.49	87.22	65.63	70.73	63.51	65.45	64.81	68.66	87.65	66.23	66.67	75	62.5	49.02	67.19	87.2	70.73	91.18	82.95	57.89	69.62	78.05	76.84	57.14	55.77	68.42	63.89	55.74	35.9	38.1	65.57	32.35	47.22	46.15	31.03	55.32	32.56	46.15
2520	89.47	75.73	67.05	72.62	62.16	94.76	89.68	84.67	78.26	82.24	80.73	63.49	87.22	65.63	70.73	63.51	65.45	64.81	68.66	87.65	66.23	66.67	76	62.5	49.02	67.19	87.2	70.73	91.18	82.95	57.89	69.62	78.05	76.84	57.14	55.77	69.74	65.28	55.74	35.9	38.1	65.57	32.35	47.22	46.15	34.48	55.32	32.56	46.15
2540	89.47	75.73	67.05	72.62	63.51	94.76	89.68	84.67	78.26	83.18	80.73	63.49	87.22	65.63	70.73	63.51	65.45	64.81	68.66	87.65	66.23	66.67	76	62.5	49.02	67.19	87.2	71.95	91.18	82.95	57.89	69.62	78.05	76.84	57.14	55.77	69.74	65.28	55.74	35.9	38.1	65.57	32.35	47.22	46.15	34.48	55.32	32.56	46.15
2560	89.47	75.73	67.05	72.62	63.51	94.76	89.68	84.67	78.26	83.18	81.65	63.49	87.22	65.63	70.73	63.51	65.45	64.81	68.66	87.65	66.23	66.67	76	62.5	52.94	68.75	87.2	71.95	91.18	82.95	57.89	70.89	78.05	76.84	57.14	55.77	69.74	65.28	55.74	38.46	38.1	65.57	32.35	47.22	46.15	34.48	55.32	32.56	46.15
2580	89.47	75.73	67.05	73.81	64.86	94.76	90.32	84.67	78.26	83.18	81.65	63.49	87.22	65.63	70.73	64.86	65.45	64.81	68.66	87.65	66.23	66.67	76	62.5	52.94	68.75	87.2	71.95	91.18	82.95	57.89	72.15	78.05	78.95	57.14	55.77	71.05	65.28	55.74	38.46	38.1	65.57	32.35	47.22	46.15	34.48	55.32	32.56	46.15
2600	89.47	75.73	67.05	73.81	64.86	94.76	90.32	84.67	78.26	83.18	82.57	63.49	87.22	65.63	71.95	66.22	65.45	64.81	68.66	87.65	66.23	67.95	76	63.89	52.94	68.75	87.2	71.95	91.18	82.95	57.89	72.15	79.27	78.95	57.14	55.77	71.05	65.28	55.74	41.03	38.1	65.57	32.35	47.22	46.15	34.48	57.45	34.88	46.15
2620	89.47	75.73	67.05	73.81	64.86	94.76	90.32	84.67	78.26	83.18	82.57	63.49	87.97	65.63	71.95	67.57	65.45	64.81	68.66	87.65	66.23	67.95	76	63.89	52.94	68.75	87.2	71.95	91.18	82.95	57.89	72.15	79.27	78.95	57.14	57.69	71.05	65.28	57.38	41.03	38.1	65.57	32.35	47.22	46.15	34.48	57.45	37.21	48.72
2640	89.47	75.73	67.05	73.81	64.86	94.76	90.97	85.4	78.26	83.18	82.57	63.49	87.97	65.63	71.95	67.57	65.45	64.81	68.66	87.65	66.23	67.95	76	63.89	52.94	68.75	87.2	71.95	91.18	82.95	57.89	72.15	79.27	78.95	57.14	57.69	72.37	65.28	57.38	41.03	38.1	65.57	32.35	47.22	46.15	34.48	57.45	37.21	48.72
2660	89.47	75.73	67.05	73.81	66.22	94.76	90.97	85.4	78.26	83.18	82.57	63.49	87.97	67.19	73.17	67.57	65.45	64.81	68.66	87.65	66.23	67.95	76	63.89	52.94	68.75	87.2	71.95	92.94	82.95	57.89	73.42	79.27	80	57.14	57.69	72.37	65.28	57.38	41.03	38.1	65.57	32.35	47.22	46.15	34.48	57.45	37.21	48.72
2680	89.47	75.73	67.05	73.81	66.22	94.76	90.97	85.4	78.26	83.18	82.57	63.49	87.97	68.75	73.17	67.57	65.45	64.81	68.66	87.65	66.23	67.95	76	63.89	52.94	68.75	87.8	71.95	92.94	82.95	57.89	73.42	79.27	80	57.14	57.69	72.37	65.28	57.38	41.03	38.1	65.57	32.35	47.22	46.15	34.48	59.57	37.21	48.72
2700	89.47	77.67	67.05	73.81	66.22	94.76	91.61	86.13	78.26	83.18	82.57	63.49	88.72	68.75	73.17	67.57	65.45	64.81	68.66	87.65	67.53	67.95	76	63.89	52.94	68.75	88.41	71.95	92.94	82.95	57.89	73.42	80.49	80	57.14	57.69	72.37	65.28	57.38	41.03	38.1	65.57	32.35	47.22	46.15	34.48	59.57	37.21	48.72
2720	90.13	78.64	67.05	73.81	67.57	94.76	91.61	86.86	78.26	83.18	82.57	63.49	88.72	68.75	74.39	67.57	65.45	64.81	68.66	87.65	68.83	67.95	77	65.28	52.94	68.75	88.41	73.17	92.94	82.95	57.89	73.42	80.49	80	58.93	59.62	72.37	65.28	57.38	41.03	38.1	65.57	35.29	47.22	46.15	34.48	59.57	37.21	48.72
2740	90.13	78.64	67.05	73.81	67.57	94.76	91.61	87.59	78.26	83.18	82.57	65.08	88.72	68.75	74.39	67.57	65.45	64.81	70.15	87.65	68.83	67.95	78	65.28	52.94	68.75	88.41	73.17	92.94	82.95	57.89	73.42	80.49	80	58.93	61.54	72.37	65.28	57.38	41.03	38.1	67.21	35.29	47.22	46.15	34.48	59.57	37.21	48.72
2760	90.13	78.64	68.18	75	67.57	94.76	91.61	87.59	78.26	83.18	82.57	65.08	88.72	68.75	74.39	67.57	65.45	64.81	70.15	87.65	68.83	67.95	78	65.28	52.94	68.75	88.41	73.17	92.94	82.95	59.65	74.68	80.49	81.05	58.93	61.54	73.68	65.28	57.38	41.03	38.1	67.21	35.29	47.22	46.15	34.48	59.57	39.53	48.72
2780	90.79	78.64	68.18	75	67.57	94.76	91.61	88.32	78.26	84.11	82.57	65.08	88.72	68.75	74.39	67.57	65.45	66.67	71.64	87.65	68.83	67.95	78	66.67	52.94	68.75	88.41	73.17	92.94	82.95	61.4	74.68	80.49	81.05	58.93	61.54	73.68	65.28	57.38	41.03	38.1	67.21	35.29	47.22	46.15	37.93	59.57	41.86	51.28
2800	90.79	78.64	68.18	75	67.57	94.76	91.61	88.32	78.26	84.11	82.57	65.08	90.23	68.75	74.39	68.92	65.45	66.67	71.64	87.65	68.83	69.23	78	66.67	52.94	70.31	88.41	73.17	92.94	82.95	61.4	74.68	80.49	81.05	58.93	61.54	75	66.67	57.38	41.03	38.1	67.21	35.29	47.22	46.15	37.93	59.57	44.19	51.28
2820	90.79	78.64	69.32	75	67.57	95.29	91.61	88.32	78.26	84.11	82.57	65.08	90.23	68.75	75.61	68.92	65.45	66.67	71.64	87.65	68.83	69.23	78	68.06	52.94	70.31	89.02	73.17	92.94	82.95	61.4	74.68	80.49	81.05	58.93	61.54	75	66.67	57.38	41.03	38.1	67.21	35.29	47.22	46.15	37.93	59.57	44.19	51.28
2840	91.45	78.64	69.32	75	67.57	95.29	92.26	88.32	78.26	84.11	82.57	65.08	90.23	68.75	75.61	70.27	65.45	68.52	71.64	88.27	68.83	69.23	78	68.06	54.9	70.31	89.02	73.17	92.94	82.95	61.4	74.68	80.49	81.05	58.93	61.54	75	66.67	57.38	41.03	38.1	67.21	35.29	47.22	46.15	37.93	59.57	44.19	51.28
2860	91.45	78.64	69.32	75	67.57	95.29	92.26	88.32	78.26	84.11	82.57	65.08	90.23	68.75	76.83	71.62	65.45	68.52	71.64	88.27	68.83	69.23	78	68.06	54.9	70.31	89.02	73.17	92.94	82.95	63.16	74.68	80.49	82.11	58.93	61.54	75	66.67	57.38	41.03	38.1	67.21	35.29	47.22	46.15	37.93	59.57	44.19	51.28
2880	91.45	78.64	69.32	75	67.57	95.29	92.9	89.05	79.35	84.11	83.49	65.08	90.23	68.75	76.83	72.97	65.45	68.52	71.64	88.89	68.83	69.23	78	68.06	54.9	71.88	89.02	74.39	92.94	85.23	63.16	74.68	80.49	82.11	58.93	63.46	75	66.67	59.02	41.03	38.1	67.21	35.29	47.22	46.15	37.93	59.57	44.19	51.28
2900	91.45	78.64	69.32	75	67.57	95.29	92.9	89.78	79.35	84.11	83.49	65.08	90.23	68.75	76.83	72.97	65.45	68.52	71.64	88.89	68.83	70.51	78	68.06	54.9	73.44	89.02	75.61	92.94	85.23	63.16	74.68	80.49	82.11	58.93	63.46	75	66.67	59.02	41.03	38.1	67.21	35.29	47.22	46.15	37.93	59.57	44.19	51.28
2920	91.45	81.55	69.32	75	68.92	95.81	92.9	89.78	79.35	85.05	83.49	65.08	90.23	68.75	76.83	74.32	65.45	68.52	71.64	88.89	68.83	70.51	78	68.06	54.9	73.44	89.02	76.83	92.94	85.23	64.91	74.68	80.49	82.11	58.93	63.46	75	68.06	59.02	41.03	38.1	67.21	35.29	47.22	46.15	37.93	59.57	44.19	51.28
2940	92.11	81.55	69.32	75	68.92	95.81	92.9	90.51	79.35	85.98	83.49	65.08	90.23	68.75	76.83	75.68	65.45	68.52	71.64	88.89	68.83	70.51	78	68.06	54.9	73.44	89.02	76.83	93.53	85.23	64.91	74.68	80.49	83.16	58.93	63.46	76.32	68.06	59.02	41.03	38.1	67.21	35.29	47.22	46.15	37.93	59.57	44.19	51.28
2960	92.11	81.55	70.45	75	68.92	95.81	92.9	90.51	80.43	85.98	83.49	66.67	90.23	68.75	76.83	75.68	65.45	68.52	71.64	88.89	68.83	70.51	78	68.06	54.9	73.44	89.02	76.83	94.12	85.23	66.67	74.68	81.71	83.16	58.93	63.46	76.32	68.06	59.02	41.03	38.1	67.21	35.29	47.22	46.15	37.93	59.57	44.19	51.28
2980	92.11	81.55	71.59	75	68.92	95.81	92.9	91.24	80.43	85.98	83.49	66.67	90.23	68.75	76.83	75.68	65.45	68.52	71.64	88.89	68.83	70.51	79	69.44	58.82	73.44	89.02	78.05	94.12	85.23	70.18	74.68	81.71	83.16	58.93	63.46	76.32	68.06	59.02	43.59	38.1	67.21	35.29	47.22	46.15	37.93	59.57	44.19	51.28
3000	92.11	81.55	71.59	75	68.92	95.81	92.9	91.24	80.43	85.98	83.49	66.67	90.23	68.75	76.83	75.68	65.45	68.52	71.64	89.51	68.83	70.51	79	69.44	58.82	75	89.02	78.05	94.12	85.23	70.18	74.68	81.71	83.16	58.93	63.46	78.95	68.06	59.02	46.15	38.1	67.21	35.29	47.22	46.15	37.93	59.57	44.19	51.28
3020	92.11	81.55	73.86	75	71.62	95.81	92.9	91.24	81.52	85.98	83.49	66.67	90.23	68.75	76.83	75.68	65.45	68.52	71.64	89.51	68.83	71.79	80	69.44	58.82	76.56	89.02	78.05	94.12	85.23	70.18	74.68	81.71	83.16	58.93	63.46	78.95	69.44	59.02	46.15	38.1	67.21	35.29	47.22	46.15	37.93	59.57	44.19	51.28
3040	92.76	81.55	73.86	75	71.62	95.81	92.9	91.24	81.52	86.92	83.49	66.67	90.23	70.31	76.83	75.68	65.45	68.52	71.64	89.51	68.83	71.79	80	69.44	60.78	76.56	89.02	79.27	94.12	85.23	70.18	74.68	81.71	83.16	58.93	63.46	78.95	69.44	59.02	46.15	38.1	67.21	35.29	47.22	46.15	37.93	61.7	46.51	51.28
3060	92.76	81.55	73.86	75	71.62	96.34	92.9	91.24	82.61	86.92	83.49	66.67	90.23	70.31	76.83	75.68	65.45	68.52	71.64	89.51	70.13	71.79	80	69.44	60.78	76.56	89.02	79.27	94.71	85.23	70.18	74.68	81.71	83.16	58.93	63.46	78.95	69.44	59.02	46.15	38.1	67.21	35.29	47.22	50	37.93	61.7	46.51	51.28
3080	93.42	81.55	73.86	75	71.62	96.34	93.55	91.97	82.61	86.92	83.49	66.67	90.23	70.31	78.05	75.68	65.45	70.37	71.64	89.51	70.13	71.79	80	70.83	60.78	78.13	89.02	79.27	94.71	86.36	70.18	74.68	81.71	83.16	58.93	63.46	80.26	69.44	59.02	46.15	38.1	67.21	35.29	47.22	50	37.93	61.7	46.51	51.28
3100	93.42	81.55	75	75	71.62	96.86	93.55	91.97	82.61	86.92	83.49	66.67	90.23	70.31	78.05	75.68	65.45	70.37	73.13	89.51	70.13	73.08	81	70.83	62.75	78.13	89.02	79.27	94.71	86.36	70.18	74.68	81.71	83.16	60.71	63.46	80.26	69.44	60.66	46.15	40.48	67.21	35.29	47.22	50	37.93	61.7	46.51	51.28
3120	93.42	81.55	75	75	71.62	96.86	93.55	91.97	82.61	86.92	83.49	68.25	90.23	70.31	78.05	75.68	65.45	70.37	73.13	90.74	70.13	73.08	81	72.22	64.71	78.13	89.02	79.27	94.71	86.36	70.18	74.68	81.71	83.16	60.71	63.46	80.26	69.44	62.3	46.15	40.48	68.85	35.29	47.22	50	37.93	61.7	46.51	53.85
3140	93.42	83.5	76.14	76.19	71.62	96.86	93.55	91.97	83.7	86.92	83.49	68.25	90.23	70.31	78.05	75.68	65.45	70.37	73.13	90.74	70.13	74.36	81	72.22	64.71	78.13	89.02	79.27	94.71	86.36	70.18	74.68	81.71	84.21	60.71	63.46	81.58	69.44	62.3	46.15	40.48	68.85	35.29	47.22	50	37.93	61.7	48.84	53.85
3160	93.42	83.5	76.14	76.19	71.62	96.86	94.84	91.97	83.7	86.92	83.49	68.25	90.98	70.31	78.05	75.68	65.45	70.37	74.63	90.74	71.43	75.64	81	72.22	64.71	78.13	89.02	80.49	94.71	86.36	70.18	74.68	81.71	84.21	60.71	63.46	81.58	69.44	62.3	46.15	40.48	68.85	35.29	47.22	50	37.93	61.7	48.84	53.85
3180	94.08	83.5	76.14	76.19	71.62	96.86	94.84	92.7	83.7	86.92	83.49	68.25	90.98	70.31	78.05	75.68	65.45	70.37	74.63	90.74	71.43	76.92	82	72.22	68.63	78.13	89.02	80.49	94.71	86.36	70.18	74.68	82.93	84.21	60.71	65.38	81.58	69.44	63.93	46.15	42.86	68.85	35.29	47.22	50	37.93	61.7	48.84	53.85
3200	94.08	83.5	76.14	76.19	71.62	96.86	95.48	92.7	83.7	87.85	83.49	68.25	91.73	70.31	78.05	75.68	65.45	70.37	74.63	90.74	71.43	76.92	82	73.61	68.63	78.13	89.02	80.49	94.71	86.36	70.18	75.95	82.93	85.26	62.5	65.38	81.58	69.44	63.93	46.15	42.86	70.49	35.29	47.22	50	37.93	61.7	48.84	58.97
3220	94.08	83.5	76.14	76.19	71.62	96.86	95.48	92.7	83.7	87.85	83.49	68.25	91.73	70.31	78.05	75.68	65.45	72.22	74.63	90.74	71.43	76.92	83	73.61	68.63	78.13	89.02	80.49	94.71	86.36	70.18	75.95	82.93	85.26	62.5	65.38	81.58	70.83	65.57	46.15	42.86	70.49	35.29	47.22	50	37.93	61.7	48.84	58.97
3240	94.08	83.5	76.14	76.19	71.62	96.86	95.48	93.43	83.7	87.85	83.49	68.25	91.73	70.31	79.27	75.68	65.45	72.22	74.63	90.74	71.43	78.21	83	73.61	68.63	78.13	89.02	80.49	94.71	86.36	70.18	75.95	82.93	85.26	62.5	65.38	81.58	70.83	65.57	46.15	42.86	70.49	35.29	47.22	50	37.93	61.7	48.84	58.97
3260	94.74	83.5	76.14	76.19	71.62	97.38	95.48	94.16	83.7	87.85	84.4	68.25	91.73	70.31	79.27	75.68	65.45	72.22	74.63	90.74	71.43	78.21	83	73.61	68.63	78.13	89.02	80.49	94.71	86.36	70.18	75.95	82.93	85.26	62.5	65.38	81.58	70.83	65.57	46.15	42.86	70.49	35.29	47.22	50	37.93	61.7	48.84	58.97
3280	94.74	84.47	76.14	76.19	72.97	97.91	95.48	94.16	83.7	87.85	84.4	68.25	91.73	70.31	79.27	75.68	65.45	72.22	74.63	90.74	71.43	78.21	83	73.61	70.59	78.13	89.02	80.49	94.71	86.36	70.18	75.95	82.93	85.26	62.5	65.38	81.58	70.83	65.57	46.15	42.86	70.49	35.29	47.22	50	37.93	61.7	48.84	58.97
3300	94.74	84.47	76.14	76.19	72.97	97.91	95.48	94.16	84.78	87.85	84.4	68.25	91.73	70.31	79.27	75.68	65.45	72.22	74.63	90.74	71.43	78.21	83	73.61	70.59	78.13	89.02	80.49	94.71	86.36	70.18	75.95	82.93	85.26	62.5	65.38	81.58	70.83	65.57	46.15	42.86	70.49	35.29	47.22	50	37.93	61.7	48.84	58.97
3320	94.74	84.47	76.14	76.19	74.32	97.91	95.48	94.16	84.78	87.85	84.4	68.25	91.73	70.31	79.27	75.68	65.45	72.22	74.63	90.74	71.43	78.21	83	75	70.59	78.13	89.02	80.49	94.71	86.36	70.18	75.95	82.93	85.26	62.5	65.38	81.58	70.83	67.21	46.15	42.86	70.49	35.29	47.22	50	37.93	61.7	48.84	58.97
3340	94.74	85.44	76.14	76.19	74.32	97.91	95.48	94.16	85.87	87.85	85.32	68.25	91.73	70.31	79.27	75.68	65.45	72.22	74.63	90.74	75.32	78.21	83	75	70.59	78.13	89.63	80.49	95.29	86.36	70.18	75.95	82.93	85.26	62.5	65.38	81.58	70.83	67.21	46.15	45.24	72.13	35.29	47.22	50	37.93	61.7	48.84	58.97
3360	94.74	85.44	76.14	76.19	74.32	97.91	95.48	94.16	85.87	88.79	85.32	68.25	92.48	71.88	79.27	75.68	65.45	72.22	74.63	90.74	75.32	78.21	83	75	70.59	78.13	89.63	80.49	95.29	86.36	70.18	75.95	82.93	85.26	62.5	65.38	81.58	70.83	67.21	46.15	45.24	72.13	35.29	47.22	50	37.93	61.7	48.84	58.97
3380	94.74	85.44	76.14	76.19	74.32	98.43	95.48	94.16	85.87	88.79	85.32	68.25	92.48	71.88	79.27	75.68	65.45	72.22	74.63	90.74	75.32	79.49	83	76.39	70.59	78.13	89.63	80.49	95.29	86.36	70.18	75.95	82.93	85.26	62.5	65.38	81.58	72.22	67.21	46.15	45.24	72.13	35.29	47.22	50	37.93	61.7	48.84	61.54
3400	94.74	86.41	77.27	76.19	74.32	98.43	95.48	94.16	85.87	88.79	85.32	68.25	93.23	73.44	79.27	75.68	65.45	72.22	74.63	90.74	75.32	79.49	83	76.39	70.59	78.13	90.85	80.49	95.29	86.36	70.18	75.95	82.93	85.26	62.5	65.38	81.58	72.22	67.21	46.15	45.24	75.41	35.29	47.22	53.85	37.93	61.7	48.84	61.54
3420	95.39	86.41	77.27	76.19	74.32	98.43	95.48	94.16	86.96	88.79	85.32	68.25	93.98	73.44	80.49	75.68	65.45	72.22	74.63	91.36	75.32	79.49	83	76.39	70.59	78.13	90.85	80.49	95.29	87.5	70.18	77.22	82.93	85.26	62.5	65.38	81.58	72.22	67.21	46.15	45.24	75.41	35.29	47.22	53.85	37.93	61.7	48.84	61.54
3440	95.39	86.41	78.41	76.19	74.32	98.43	95.48	94.16	86.96	88.79	85.32	68.25	93.98	73.44	80.49	77.03	69.09	72.22	74.63	91.36	75.32	79.49	83	76.39	70.59	78.13	90.85	80.49	95.29	87.5	70.18	77.22	82.93	85.26	62.5	65.38	81.58	75	67.21	46.15	45.24	75.41	35.29	47.22	53.85	37.93	61.7	48.84	61.54
3460	95.39	86.41	78.41	76.19	77.03	98.43	95.48	94.16	88.04	88.79	85.32	69.84	94.74	73.44	80.49	77.03	69.09	72.22	74.63	91.36	75.32	79.49	84	76.39	70.59	79.69	90.85	81.71	95.29	87.5	70.18	77.22	82.93	85.26	62.5	65.38	81.58	75	67.21	46.15	45.24	75.41	35.29	47.22	53.85	37.93	63.83	51.16	61.54
3480	95.39	86.41	79.55	76.19	77.03	98.43	95.48	94.16	88.04	88.79	86.24	69.84	94.74	73.44	80.49	77.03	69.09	72.22	74.63	91.36	75.32	79.49	84	76.39	70.59	79.69	90.85	81.71	95.29	87.5	70.18	77.22	82.93	85.26	64.29	65.38	81.58	75	67.21	46.15	45.24	75.41	38.24	47.22	53.85	37.93	63.83	51.16	61.54
3500	95.39	86.41	79.55	76.19	77.03	98.43	95.48	94.16	88.04	88.79	86.24	69.84	94.74	73.44	80.49	77.03	69.09	72.22	74.63	91.36	76.62	79.49	84	76.39	70.59	79.69	90.85	81.71	95.29	87.5	70.18	77.22	82.93	85.26	64.29	65.38	81.58	75	67.21	46.15	45.24	75.41	38.24	47.22	53.85	37.93	65.96	51.16	61.54
3520	95.39	86.41	80.68	76.19	77.03	98.43	95.48	94.16	88.04	88.79	86.24	69.84	94.74	73.44	80.49	77.03	69.09	72.22	74.63	91.36	76.62	79.49	84	76.39	70.59	79.69	90.85	81.71	95.29	87.5	70.18	77.22	82.93	85.26	64.29	65.38	81.58	75	67.21	46.15	47.62	75.41	38.24	47.22	53.85	37.93	65.96	51.16	61.54
3540	95.39	86.41	80.68	76.19	77.03	98.43	95.48	94.16	88.04	88.79	86.24	69.84	94.74	73.44	80.49	77.03	69.09	72.22	74.63	91.36	76.62	79.49	84	76.39	70.59	79.69	90.85	81.71	95.29	87.5	70.18	77.22	82.93	86.32	64.29	65.38	81.58	75	67.21	46.15	47.62	75.41	38.24	50	53.85	37.93	65.96	51.16	61.54
3560	95.39	86.41	80.68	76.19	77.03	98.43	95.48	94.16	88.04	88.79	86.24	69.84	94.74	73.44	80.49	77.03	69.09	72.22	74.63	91.36	76.62	79.49	84	76.39	70.59	79.69	90.85	81.71	95.29	87.5	70.18	77.22	82.93	86.32	64.29	65.38	81.58	76.39	67.21	46.15	47.62	75.41	38.24	50	53.85	37.93	65.96	51.16	61.54
3580	95.39	86.41	80.68	76.19	77.03	98.43	95.48	94.89	88.04	88.79	86.24	69.84	94.74	73.44	80.49	77.03	69.09	72.22	74.63	91.98	76.62	79.49	84	77.78	70.59	79.69	90.85	81.71	95.29	87.5	70.18	77.22	82.93	86.32	64.29	67.31	81.58	76.39	67.21	48.72	47.62	75.41	38.24	50	53.85	37.93	65.96	51.16	61.54
3600	95.39	86.41	80.68	77.38	77.03	98.43	95.48	94.89	88.04	88.79	87.16	69.84	94.74	73.44	80.49	77.03	69.09	72.22	74.63	91.98	76.62	79.49	84	77.78	70.59	79.69	90.85	81.71	95.29	87.5	70.18	78.48	82.93	86.32	64.29	69.23	81.58	76.39	67.21	48.72	47.62	75.41	41.18	50	53.85	37.93	65.96	51.16	61.54
3620	95.39	86.41	80.68	77.38	77.03	98.95	95.48	94.89	88.04	90.65	87.16	69.84	94.74	73.44	80.49	77.03	69.09	72.22	74.63	91.98	76.62	79.49	84	77.78	70.59	79.69	91.46	81.71	95.29	88.64	70.18	78.48	82.93	86.32	64.29	69.23	81.58	76.39	67.21	48.72	47.62	75.41	41.18	50	53.85	37.93	65.96	51.16	61.54
3640	95.39	86.41	80.68	79.76	77.03	98.95	95.48	94.89	88.04	90.65	87.16	69.84	94.74	73.44	80.49	77.03	69.09	72.22	74.63	91.98	76.62	79.49	85	77.78	70.59	79.69	91.46	82.93	95.29	89.77	70.18	78.48	82.93	86.32	64.29	69.23	82.89	76.39	67.21	48.72	47.62	75.41	41.18	50	53.85	37.93	65.96	51.16	61.54
3660	95.39	86.41	80.68	79.76	77.03	98.95	95.48	94.89	88.04	90.65	87.16	69.84	94.74	73.44	80.49	77.03	69.09	72.22	76.12	91.98	76.62	79.49	86	77.78	70.59	79.69	91.46	82.93	95.29	89.77	70.18	78.48	82.93	86.32	64.29	69.23	82.89	76.39	67.21	48.72	47.62	75.41	41.18	50	53.85	37.93	65.96	51.16	61.54
3680	95.39	86.41	80.68	79.76	77.03	98.95	95.48	94.89	88.04	90.65	87.16	69.84	94.74	73.44	80.49	78.38	70.91	72.22	76.12	91.98	76.62	79.49	86	77.78	70.59	79.69	91.46	82.93	95.29	89.77	70.18	78.48	82.93	86.32	64.29	69.23	82.89	76.39	67.21	48.72	52.38	75.41	41.18	50	53.85	37.93	65.96	53.49	61.54
3700	95.39	86.41	80.68	79.76	77.03	98.95	95.48	94.89	88.04	90.65	87.16	69.84	94.74	73.44	80.49	78.38	70.91	74.07	76.12	91.98	77.92	82.05	86	77.78	70.59	79.69	92.07	82.93	95.29	89.77	70.18	79.75	82.93	86.32	64.29	69.23	82.89	76.39	67.21	48.72	52.38	75.41	44.12	50	53.85	37.93	65.96	53.49	61.54
3720	95.39	86.41	80.68	79.76	77.03	98.95	95.48	94.89	88.04	90.65	87.16	69.84	94.74	73.44	80.49	78.38	72.73	74.07	76.12	91.98	77.92	82.05	87	77.78	70.59	81.25	92.07	82.93	95.29	89.77	70.18	79.75	84.15	86.32	64.29	69.23	82.89	76.39	67.21	48.72	52.38	75.41	44.12	50	53.85	37.93	65.96	53.49	61.54
3740	96.05	86.41	80.68	79.76	77.03	98.95	95.48	94.89	88.04	90.65	87.16	69.84	94.74	73.44	80.49	78.38	72.73	74.07	77.61	91.98	77.92	82.05	87	77.78	72.55	81.25	92.07	82.93	95.88	89.77	70.18	79.75	84.15	86.32	64.29	69.23	82.89	76.39	67.21	48.72	52.38	75.41	44.12	50	53.85	37.93	65.96	53.49	61.54
3760	96.05	86.41	80.68	79.76	77.03	98.95	95.48	94.89	89.13	90.65	87.16	69.84	94.74	73.44	80.49	78.38	72.73	74.07	77.61	91.98	77.92	82.05	87	79.17	72.55	81.25	92.07	82.93	95.88	89.77	70.18	79.75	84.15	86.32	64.29	69.23	82.89	76.39	67.21	48.72	52.38	75.41	44.12	50	53.85	37.93	65.96	53.49	61.54
3780	96.05	86.41	80.68	79.76	78.38	98.95	95.48	94.89	89.13	91.59	87.16	69.84	94.74	73.44	80.49	78.38	72.73	74.07	77.61	91.98	79.22	82.05	87	79.17	72.55	81.25	92.07	82.93	96.47	89.77	70.18	79.75	84.15	86.32	64.29	69.23	82.89	76.39	67.21	48.72	54.76	75.41	47.06	50	53.85	37.93	65.96	53.49	64.1
3800	96.05	86.41	80.68	79.76	79.73	99.48	95.48	94.89	89.13	91.59	88.07	69.84	94.74	73.44	80.49	78.38	72.73	74.07	77.61	91.98	80.52	82.05	87	79.17	74.51	81.25	92.07	84.15	96.47	89.77	70.18	79.75	84.15	87.37	64.29	69.23	82.89	76.39	67.21	48.72	54.76	75.41	47.06	50	53.85	37.93	65.96	53.49	64.1
3820	96.05	86.41	80.68	79.76	79.73	99.48	95.48	94.89	89.13	91.59	88.07	69.84	94.74	73.44	80.49	78.38	72.73	74.07	77.61	91.98	80.52	82.05	87	79.17	74.51	81.25	92.07	84.15	96.47	90.91	70.18	79.75	84.15	87.37	64.29	69.23	82.89	76.39	67.21	48.72	54.76	75.41	47.06	50	53.85	37.93	65.96	53.49	64.1
3840	96.71	86.41	80.68	80.95	79.73	99.48	95.48	94.89	89.13	91.59	88.07	69.84	95.49	73.44	80.49	78.38	72.73	74.07	77.61	91.98	80.52	82.05	87	79.17	74.51	81.25	92.07	84.15	97.06	90.91	70.18	79.75	84.15	87.37	64.29	69.23	82.89	76.39	67.21	48.72	54.76	75.41	50	50	53.85	37.93	65.96	53.49	64.1
3860	96.71	86.41	80.68	82.14	79.73	99.48	95.48	94.89	89.13	91.59	88.07	69.84	95.49	73.44	80.49	79.73	72.73	74.07	77.61	91.98	80.52	82.05	87	80.56	74.51	81.25	92.07	84.15	97.06	90.91	71.93	79.75	84.15	87.37	64.29	69.23	82.89	76.39	67.21	48.72	54.76	75.41	50	52.78	53.85	37.93	65.96	53.49	66.67
3880	96.71	87.38	80.68	82.14	79.73	99.48	95.48	94.89	89.13	92.52	88.07	69.84	95.49	73.44	81.71	79.73	72.73	74.07	77.61	91.98	80.52	82.05	87	80.56	74.51	81.25	92.07	84.15	97.06	90.91	71.93	79.75	84.15	87.37	64.29	69.23	82.89	76.39	67.21	48.72	54.76	75.41	50	52.78	53.85	37.93	65.96	55.81	66.67
3900	96.71	87.38	80.68	82.14	79.73	99.48	95.48	94.89	89.13	92.52	88.07	69.84	95.49	73.44	81.71	79.73	72.73	74.07	77.61	91.98	80.52	82.05	87	80.56	74.51	81.25	92.07	84.15	97.06	90.91	71.93	79.75	84.15	88.42	66.07	69.23	82.89	76.39	67.21	51.28	54.76	75.41	50	52.78	53.85	37.93	65.96	55.81	66.67
3920	96.71	87.38	81.82	82.14	81.08	99.48	95.48	94.89	89.13	92.52	88.07	69.84	95.49	73.44	81.71	79.73	72.73	74.07	77.61	91.98	80.52	82.05	87	80.56	74.51	84.38	92.07	84.15	97.06	90.91	71.93	79.75	85.37	88.42	66.07	69.23	82.89	76.39	67.21	51.28	54.76	77.05	50	52.78	53.85	37.93	65.96	55.81	66.67
3940	96.71	87.38	81.82	82.14	81.08	99.48	95.48	94.89	89.13	92.52	88.07	69.84	95.49	73.44	81.71	79.73	72.73	74.07	77.61	91.98	80.52	82.05	88	80.56	74.51	84.38	92.07	84.15	97.06	90.91	71.93	79.75	85.37	89.47	66.07	69.23	82.89	76.39	67.21	51.28	54.76	77.05	50	52.78	53.85	37.93	65.96	55.81	66.67
3960	96.71	87.38	81.82	82.14	81.08	99.48	95.48	94.89	89.13	92.52	88.07	69.84	95.49	75	81.71	79.73	72.73	74.07	77.61	92.59	80.52	82.05	88	80.56	74.51	84.38	92.07	84.15	97.06	90.91	73.68	81.01	85.37	90.53	66.07	69.23	82.89	76.39	67.21	51.28	54.76	77.05	50	52.78	53.85	37.93	65.96	58.14	66.67
3980	96.71	87.38	81.82	82.14	82.43	99.48	96.13	94.89	89.13	92.52	88.07	69.84	96.24	75	81.71	79.73	72.73	74.07	77.61	92.59	80.52	82.05	88	80.56	74.51	84.38	92.07	84.15	97.06	90.91	73.68	81.01	85.37	90.53	66.07	69.23	82.89	76.39	68.85	51.28	54.76	77.05	50	52.78	53.85	37.93	65.96	58.14	66.67
4000	96.71	87.38	81.82	82.14	82.43	99.48	96.13	94.89	89.13	92.52	88.07	69.84	96.24	75	81.71	79.73	72.73	74.07	77.61	92.59	80.52	82.05	88	80.56	74.51	84.38	92.07	84.15	97.06	90.91	73.68	81.01	85.37	90.53	66.07	69.23	82.89	77.78	70.49	51.28	54.76	77.05	50	52.78	53.85	37.93	65.96	58.14	66.67
4020	97.37	87.38	81.82	82.14	82.43	99.48	96.13	94.89	89.13	92.52	88.07	69.84	96.24	75	81.71	79.73	72.73	74.07	77.61	92.59	80.52	82.05	88	80.56	74.51	84.38	92.07	84.15	97.06	92.05	73.68	81.01	85.37	90.53	66.07	69.23	82.89	77.78	72.13	51.28	54.76	77.05	50	52.78	53.85	37.93	65.96	58.14	66.67
4040	97.37	87.38	82.95	82.14	82.43	99.48	96.13	95.62	89.13	92.52	88.07	69.84	96.24	75	81.71	79.73	74.55	74.07	77.61	92.59	80.52	82.05	88	80.56	74.51	84.38	92.07	84.15	97.06	92.05	73.68	81.01	85.37	90.53	66.07	69.23	82.89	77.78	72.13	51.28	54.76	77.05	50	52.78	53.85	41.38	65.96	58.14	66.67
4060	97.37	87.38	82.95	82.14	82.43	99.48	96.13	95.62	89.13	92.52	88.07	69.84	96.24	75	81.71	79.73	74.55	74.07	77.61	92.59	80.52	84.62	88	80.56	74.51	85.94	92.07	84.15	97.06	92.05	73.68	81.01	86.59	90.53	66.07	69.23	82.89	77.78	72.13	56.41	54.76	77.05	50	52.78	53.85	41.38	65.96	58.14	66.67
4080	97.37	87.38	82.95	83.33	82.43	99.48	96.13	95.62	89.13	92.52	88.07	69.84	96.24	75	81.71	79.73	74.55	75.93	77.61	92.59	80.52	84.62	88	83.33	74.51	85.94	92.07	84.15	97.65	92.05	73.68	82.28	86.59	90.53	67.86	69.23	82.89	77.78	73.77	56.41	54.76	77.05	50	52.78	53.85	41.38	65.96	62.79	69.23
4100	97.37	87.38	84.09	83.33	82.43	99.48	96.13	95.62	89.13	92.52	88.07	69.84	96.24	75	81.71	79.73	76.36	75.93	79.1	92.59	80.52	84.62	89	83.33	74.51	85.94	92.07	84.15	97.65	92.05	75.44	82.28	86.59	90.53	67.86	69.23	82.89	79.17	73.77	56.41	54.76	77.05	50	52.78	53.85	41.38	68.09	62.79	69.23
4120	97.37	87.38	84.09	84.52	82.43	99.48	96.13	95.62	89.13	92.52	88.07	71.43	96.24	75	81.71	79.73	76.36	75.93	80.6	92.59	80.52	84.62	90	83.33	74.51	85.94	92.07	84.15	97.65	92.05	75.44	83.54	86.59	90.53	67.86	69.23	82.89	79.17	73.77	58.97	57.14	78.69	52.94	52.78	53.85	41.38	68.09	62.79	69.23
4140	97.37	87.38	84.09	84.52	82.43	99.48	96.13	95.62	89.13	92.52	88.07	71.43	96.24	75	81.71	79.73	76.36	75.93	80.6	92.59	80.52	85.9	90	83.33	74.51	85.94	92.07	84.15	97.65	92.05	75.44	83.54	86.59	90.53	69.64	69.23	82.89	79.17	73.77	58.97	59.52	78.69	52.94	52.78	53.85	41.38	70.21	65.12	69.23
4160	97.37	87.38	84.09	84.52	82.43	99.48	96.13	95.62	89.13	92.52	88.07	71.43	96.24	75	81.71	81.08	76.36	75.93	80.6	92.59	80.52	85.9	91	83.33	74.51	85.94	92.07	84.15	97.65	92.05	75.44	83.54	86.59	90.53	69.64	69.23	82.89	80.56	73.77	58.97	59.52	78.69	52.94	52.78	53.85	41.38	70.21	65.12	69.23
4180	97.37	87.38	84.09	85.71	82.43	99.48	96.13	95.62	89.13	93.46	88.07	71.43	96.24	75	85.37	81.08	76.36	75.93	80.6	92.59	80.52	87.18	91	83.33	74.51	85.94	92.07	84.15	97.65	92.05	77.19	83.54	89.02	90.53	69.64	69.23	82.89	80.56	77.05	58.97	59.52	78.69	52.94	52.78	53.85	41.38	70.21	65.12	69.23
4200	97.37	87.38	84.09	85.71	82.43	99.48	96.13	95.62	89.13	93.46	88.07	71.43	96.99	75	85.37	81.08	78.18	75.93	80.6	92.59	80.52	87.18	91	83.33	74.51	85.94	92.07	84.15	97.65	92.05	77.19	84.81	89.02	90.53	69.64	69.23	82.89	80.56	77.05	58.97	59.52	78.69	52.94	52.78	53.85	41.38	70.21	65.12	69.23
4220	98.03	87.38	84.09	85.71	82.43	99.48	96.13	95.62	89.13	93.46	88.07	71.43	96.99	75	85.37	81.08	78.18	75.93	80.6	92.59	80.52	87.18	92	83.33	74.51	85.94	92.68	84.15	97.65	92.05	78.95	84.81	89.02	90.53	69.64	69.23	82.89	80.56	77.05	58.97	59.52	78.69	52.94	52.78	57.69	41.38	70.21	65.12	69.23
4240	98.03	88.35	84.09	85.71	82.43	99.48	96.13	95.62	90.22	93.46	88.99	71.43	96.99	75	85.37	81.08	78.18	75.93	80.6	92.59	80.52	87.18	92	83.33	74.51	85.94	92.68	84.15	97.65	92.05	78.95	84.81	89.02	90.53	69.64	69.23	82.89	80.56	77.05	58.97	59.52	78.69	52.94	52.78	57.69	41.38	70.21	65.12	69.23
4260	98.03	88.35	84.09	85.71	82.43	99.48	96.13	95.62	90.22	93.46	89.91	71.43	96.99	76.56	85.37	82.43	78.18	75.93	82.09	92.59	81.82	87.18	92	83.33	74.51	85.94	92.68	84.15	97.65	92.05	78.95	84.81	89.02	90.53	69.64	69.23	82.89	80.56	77.05	58.97	59.52	78.69	52.94	52.78	57.69	41.38	70.21	65.12	69.23
4280	98.03	88.35	85.23	85.71	82.43	99.48	96.13	95.62	90.22	93.46	89.91	71.43	96.99	76.56	85.37	82.43	80	75.93	83.58	92.59	81.82	87.18	92	83.33	74.51	85.94	92.68	84.15	97.65	92.05	78.95	84.81	89.02	90.53	69.64	69.23	82.89	80.56	77.05	58.97	59.52	78.69	52.94	52.78	57.69	41.38	70.21	65.12	69.23
4300	98.68	88.35	85.23	86.9	82.43	99.48	96.13	95.62	90.22	93.46	89.91	71.43	96.99	76.56	85.37	83.78	80	75.93	83.58	92.59	81.82	87.18	93	83.33	74.51	85.94	92.68	84.15	97.65	92.05	80.7	84.81	89.02	90.53	69.64	69.23	82.89	80.56	77.05	58.97	61.9	78.69	52.94	52.78	57.69	41.38	70.21	65.12	69.23
4320	98.68	88.35	85.23	86.9	82.43	99.48	96.13	95.62	90.22	93.46	89.91	71.43	96.99	76.56	85.37	83.78	80	75.93	83.58	92.59	81.82	87.18	93	84.72	74.51	85.94	92.68	84.15	97.65	92.05	80.7	84.81	89.02	90.53	69.64	69.23	82.89	81.94	77.05	58.97	61.9	78.69	52.94	52.78	57.69	41.38	70.21	65.12	69.23
4340	98.68	88.35	85.23	86.9	83.78	99.48	96.13	95.62	90.22	93.46	89.91	71.43	96.99	76.56	86.59	83.78	80	75.93	83.58	92.59	81.82	87.18	93	84.72	74.51	85.94	93.29	84.15	97.65	92.05	80.7	84.81	89.02	90.53	69.64	69.23	82.89	81.94	78.69	58.97	61.9	78.69	52.94	52.78	57.69	41.38	70.21	65.12	69.23
4360	98.68	88.35	85.23	86.9	83.78	99.48	96.13	95.62	90.22	93.46	89.91	71.43	96.99	76.56	86.59	83.78	80	75.93	83.58	92.59	81.82	88.46	93	84.72	74.51	85.94	93.29	84.15	97.65	92.05	80.7	84.81	89.02	90.53	69.64	69.23	82.89	81.94	78.69	61.54	61.9	78.69	52.94	52.78	57.69	41.38	70.21	65.12	69.23
4380	98.68	89.32	85.23	86.9	83.78	99.48	96.13	95.62	90.22	93.46	89.91	71.43	96.99	76.56	86.59	85.14	80	75.93	83.58	92.59	81.82	88.46	93	84.72	74.51	85.94	93.29	84.15	97.65	92.05	80.7	84.81	89.02	90.53	69.64	69.23	82.89	81.94	78.69	61.54	61.9	78.69	52.94	52.78	57.69	41.38	70.21	65.12	69.23
4400	98.68	90.29	85.23	88.1	83.78	99.48	96.13	95.62	90.22	93.46	89.91	71.43	96.99	76.56	87.8	85.14	80	75.93	83.58	92.59	81.82	88.46	93	84.72	74.51	85.94	93.29	84.15	97.65	92.05	80.7	84.81	89.02	90.53	69.64	69.23	82.89	81.94	78.69	61.54	61.9	78.69	52.94	52.78	57.69	41.38	70.21	65.12	69.23
4420	98.68	90.29	85.23	88.1	83.78	99.48	96.13	95.62	90.22	93.46	89.91	71.43	96.99	76.56	87.8	85.14	80	75.93	85.07	92.59	81.82	88.46	93	84.72	74.51	85.94	93.29	84.15	97.65	92.05	80.7	84.81	90.24	90.53	69.64	69.23	82.89	81.94	78.69	61.54	61.9	80.33	52.94	52.78	57.69	41.38	70.21	65.12	69.23
4440	98.68	90.29	85.23	88.1	83.78	100	96.13	95.62	90.22	93.46	89.91	71.43	96.99	76.56	87.8	85.14	80	75.93	85.07	92.59	81.82	88.46	93	84.72	74.51	85.94	93.29	84.15	97.65	92.05	80.7	84.81	90.24	90.53	69.64	69.23	82.89	81.94	78.69	61.54	61.9	80.33	52.94	52.78	57.69	41.38	70.21	65.12	69.23
4460	98.68	92.23	85.23	88.1	83.78	100	96.13	95.62	90.22	93.46	89.91	71.43	96.99	76.56	87.8	86.49	80	75.93	85.07	92.59	81.82	88.46	93	84.72	74.51	85.94	93.29	85.37	97.65	92.05	80.7	84.81	90.24	90.53	69.64	69.23	82.89	81.94	78.69	61.54	61.9	80.33	55.88	52.78	61.54	41.38	70.21	65.12	69.23
4480	98.68	92.23	86.36	88.1	83.78	100	96.13	95.62	90.22	94.39	90.83	71.43	96.99	76.56	87.8	87.84	80	75.93	85.07	92.59	81.82	89.74	93	84.72	74.51	85.94	93.29	85.37	97.65	92.05	80.7	84.81	90.24	90.53	69.64	69.23	82.89	81.94	78.69	64.1	61.9	80.33	55.88	52.78	61.54	41.38	70.21	65.12	69.23
4500	98.68	93.2	86.36	88.1	83.78	100	96.13	95.62	90.22	94.39	91.74	71.43	96.99	76.56	87.8	87.84	80	75.93	85.07	92.59	83.12	89.74	93	84.72	74.51	85.94	93.29	85.37	97.65	92.05	80.7	84.81	90.24	90.53	69.64	69.23	84.21	81.94	78.69	64.1	61.9	80.33	55.88	52.78	61.54	41.38	70.21	65.12	69.23
4520	98.68	94.17	86.36	88.1	83.78	100	96.13	95.62	90.22	94.39	91.74	71.43	96.99	76.56	87.8	87.84	80	75.93	85.07	92.59	83.12	89.74	93	84.72	74.51	85.94	93.9	85.37	97.65	92.05	80.7	84.81	90.24	90.53	69.64	69.23	84.21	81.94	78.69	64.1	61.9	80.33	55.88	52.78	65.38	41.38	70.21	65.12	69.23
4540	98.68	94.17	86.36	88.1	85.14	100	96.13	95.62	90.22	94.39	91.74	73.02	96.99	76.56	87.8	87.84	80	75.93	85.07	92.59	83.12	89.74	93	84.72	74.51	85.94	93.9	85.37	98.24	92.05	80.7	84.81	90.24	90.53	69.64	69.23	84.21	81.94	78.69	64.1	61.9	80.33	55.88	52.78	65.38	41.38	70.21	65.12	69.23
4560	98.68	94.17	86.36	89.29	85.14	100	96.13	95.62	90.22	94.39	91.74	73.02	97.74	78.13	89.02	87.84	80	75.93	85.07	92.59	83.12	89.74	93	84.72	74.51	85.94	93.9	85.37	98.24	93.18	80.7	86.08	91.46	91.58	69.64	69.23	84.21	81.94	78.69	64.1	64.29	80.33	55.88	55.56	65.38	41.38	70.21	65.12	69.23
4580	98.68	94.17	86.36	89.29	85.14	100	96.13	95.62	90.22	94.39	91.74	73.02	97.74	78.13	89.02	87.84	80	75.93	85.07	92.59	83.12	89.74	93	84.72	74.51	85.94	93.9	85.37	98.82	93.18	80.7	87.34	91.46	91.58	69.64	71.15	84.21	83.33	78.69	64.1	64.29	80.33	55.88	55.56	65.38	41.38	70.21	65.12	69.23
4600	98.68	94.17	86.36	89.29	85.14	100	96.13	96.35	90.22	94.39	91.74	73.02	97.74	78.13	89.02	89.19	80	75.93	85.07	92.59	83.12	89.74	93	84.72	74.51	85.94	93.9	86.59	98.82	93.18	80.7	87.34	91.46	91.58	69.64	71.15	84.21	83.33	78.69	66.67	64.29	80.33	58.82	55.56	65.38	41.38	70.21	65.12	69.23
4620	98.68	96.12	86.36	89.29	85.14	100	96.77	96.35	90.22	94.39	91.74	73.02	97.74	78.13	89.02	89.19	80	75.93	85.07	93.21	83.12	89.74	93	84.72	74.51	87.5	93.9	86.59	98.82	93.18	80.7	87.34	91.46	92.63	69.64	71.15	84.21	83.33	78.69	66.67	64.29	80.33	58.82	55.56	65.38	41.38	70.21	65.12	69.23
4640	98.68	96.12	87.5	89.29	85.14	100	97.42	96.35	90.22	95.33	91.74	73.02	97.74	78.13	89.02	89.19	80	75.93	85.07	93.21	83.12	89.74	93	84.72	74.51	87.5	93.9	86.59	98.82	93.18	80.7	87.34	91.46	92.63	69.64	71.15	84.21	84.72	78.69	66.67	64.29	80.33	58.82	55.56	65.38	44.83	70.21	65.12	69.23
4660	98.68	96.12	88.64	89.29	85.14	100	97.42	96.35	90.22	95.33	91.74	73.02	97.74	78.13	89.02	89.19	80	75.93	85.07	93.21	83.12	89.74	93	84.72	74.51	87.5	93.9	86.59	98.82	93.18	80.7	87.34	91.46	92.63	69.64	71.15	84.21	84.72	78.69	66.67	64.29	80.33	58.82	58.33	65.38	44.83	72.34	67.44	69.23
4680	98.68	96.12	88.64	89.29	85.14	100	97.42	96.35	90.22	95.33	92.66	73.02	98.5	79.69	89.02	89.19	80	75.93	86.57	93.21	83.12	89.74	94	87.5	74.51	87.5	93.9	86.59	98.82	93.18	80.7	87.34	91.46	92.63	69.64	71.15	84.21	84.72	78.69	66.67	64.29	80.33	58.82	58.33	65.38	44.83	72.34	67.44	69.23
4700	98.68	96.12	88.64	89.29	85.14	100	97.42	97.08	90.22	95.33	92.66	73.02	98.5	79.69	89.02	89.19	80	75.93	86.57	93.21	84.42	89.74	94	87.5	74.51	87.5	94.51	86.59	98.82	93.18	82.46	87.34	91.46	92.63	69.64	71.15	85.53	84.72	78.69	66.67	64.29	80.33	61.76	58.33	65.38	44.83	72.34	69.77	69.23
4720	98.68	96.12	88.64	89.29	85.14	100	97.42	97.08	90.22	95.33	92.66	73.02	98.5	81.25	89.02	89.19	80	75.93	86.57	93.21	84.42	89.74	94	87.5	74.51	87.5	94.51	86.59	98.82	93.18	84.21	87.34	91.46	92.63	69.64	71.15	85.53	84.72	78.69	66.67	64.29	80.33	61.76	58.33	65.38	44.83	72.34	69.77	69.23
4740	98.68	96.12	88.64	89.29	86.49	100	97.42	97.08	90.22	95.33	92.66	73.02	98.5	81.25	89.02	89.19	80	75.93	86.57	93.21	84.42	89.74	94	87.5	74.51	87.5	94.51	86.59	98.82	93.18	84.21	87.34	91.46	92.63	71.43	71.15	85.53	84.72	78.69	66.67	64.29	80.33	61.76	58.33	65.38	44.83	72.34	69.77	69.23
4760	98.68	96.12	88.64	89.29	86.49	100	97.42	97.08	90.22	95.33	92.66	73.02	98.5	81.25	89.02	89.19	80	75.93	86.57	93.21	84.42	89.74	94	87.5	76.47	87.5	94.51	86.59	98.82	93.18	84.21	87.34	91.46	92.63	71.43	71.15	85.53	84.72	80.33	66.67	64.29	80.33	61.76	58.33	65.38	44.83	72.34	69.77	69.23
4780	98.68	96.12	88.64	89.29	87.84	100	97.42	97.08	90.22	95.33	92.66	73.02	98.5	82.81	89.02	89.19	80	75.93	86.57	93.21	84.42	89.74	94	87.5	76.47	87.5	94.51	87.8	98.82	93.18	84.21	87.34	91.46	92.63	71.43	71.15	85.53	84.72	81.97	66.67	64.29	80.33	61.76	58.33	65.38	44.83	72.34	69.77	69.23
4800	98.68	96.12	88.64	89.29	87.84	100	97.42	97.08	90.22	95.33	92.66	73.02	98.5	82.81	89.02	89.19	80	75.93	86.57	93.83	84.42	89.74	94	87.5	78.43	87.5	94.51	89.02	98.82	93.18	84.21	87.34	91.46	92.63	71.43	71.15	85.53	84.72	81.97	71.79	64.29	80.33	61.76	58.33	65.38	44.83	72.34	69.77	69.23
4820	98.68	96.12	88.64	89.29	87.84	100	97.42	97.81	90.22	95.33	92.66	73.02	98.5	84.38	89.02	89.19	80	75.93	86.57	93.83	84.42	89.74	94	87.5	78.43	87.5	94.51	89.02	98.82	94.32	84.21	87.34	91.46	92.63	71.43	71.15	85.53	84.72	83.61	71.79	64.29	80.33	61.76	58.33	65.38	44.83	72.34	69.77	71.79
4840	98.68	96.12	89.77	89.29	87.84	100	97.42	97.81	90.22	95.33	92.66	74.6	98.5	84.38	89.02	90.54	80	75.93	86.57	93.83	84.42	89.74	94	88.89	78.43	87.5	94.51	89.02	99.41	94.32	84.21	87.34	91.46	92.63	71.43	71.15	85.53	84.72	83.61	71.79	64.29	81.97	61.76	58.33	65.38	48.28	72.34	69.77	71.79
4860	98.68	96.12	89.77	90.48	87.84	100	97.42	97.81	90.22	95.33	92.66	74.6	98.5	84.38	89.02	90.54	80	75.93	86.57	94.44	84.42	89.74	94	88.89	78.43	87.5	94.51	89.02	99.41	94.32	84.21	87.34	91.46	92.63	73.21	71.15	85.53	84.72	83.61	71.79	64.29	81.97	64.71	58.33	65.38	48.28	72.34	69.77	71.79
4880	98.68	96.12	90.91	90.48	87.84	100	97.42	97.81	90.22	95.33	92.66	76.19	98.5	84.38	89.02	90.54	81.82	75.93	86.57	94.44	85.71	89.74	94	88.89	78.43	87.5	94.51	89.02	99.41	94.32	84.21	88.61	91.46	92.63	73.21	73.08	85.53	84.72	85.25	71.79	64.29	83.61	67.65	58.33	65.38	48.28	72.34	69.77	71.79
4900	98.68	96.12	90.91	90.48	87.84	100	97.42	97.81	90.22	95.33	92.66	76.19	98.5	84.38	89.02	90.54	81.82	75.93	86.57	94.44	85.71	89.74	94	88.89	78.43	87.5	94.51	89.02	99.41	94.32	84.21	88.61	91.46	92.63	73.21	73.08	85.53	84.72	85.25	71.79	64.29	83.61	67.65	58.33	65.38	48.28	74.47	69.77	71.79
4920	98.68	96.12	90.91	90.48	87.84	100	97.42	97.81	90.22	95.33	93.58	76.19	98.5	84.38	89.02	90.54	81.82	75.93	86.57	94.44	85.71	89.74	94	88.89	78.43	87.5	94.51	90.24	99.41	94.32	84.21	88.61	91.46	92.63	73.21	73.08	85.53	84.72	85.25	71.79	64.29	83.61	67.65	58.33	65.38	48.28	74.47	69.77	71.79
4940	98.68	96.12	90.91	90.48	87.84	100	97.42	97.81	90.22	95.33	93.58	76.19	98.5	84.38	89.02	90.54	81.82	75.93	86.57	94.44	87.01	89.74	94	88.89	78.43	87.5	95.12	90.24	99.41	95.45	84.21	89.87	91.46	92.63	73.21	75	85.53	84.72	85.25	71.79	64.29	83.61	67.65	58.33	65.38	48.28	74.47	69.77	71.79
4960	98.68	96.12	90.91	91.67	87.84	100	97.42	97.81	90.22	95.33	93.58	77.78	98.5	84.38	89.02	90.54	81.82	75.93	86.57	94.44	87.01	89.74	94	88.89	78.43	87.5	95.12	90.24	99.41	95.45	84.21	89.87	91.46	92.63	73.21	75	85.53	84.72	85.25	71.79	64.29	83.61	67.65	61.11	65.38	48.28	74.47	69.77	71.79
4980	98.68	96.12	90.91	91.67	87.84	100	97.42	97.81	90.22	95.33	93.58	77.78	98.5	84.38	89.02	90.54	81.82	75.93	86.57	94.44	87.01	91.03	94	88.89	78.43	87.5	95.12	90.24	99.41	95.45	84.21	89.87	91.46	93.68	75	75	85.53	84.72	85.25	71.79	64.29	83.61	67.65	61.11	65.38	48.28	74.47	69.77	71.79
5000	98.68	96.12	90.91	91.67	87.84	100	97.42	97.81	91.3	95.33	93.58	77.78	98.5	84.38	89.02	90.54	81.82	75.93	86.57	94.44	87.01	91.03	94	88.89	78.43	87.5	95.12	90.24	99.41	96.59	84.21	89.87	91.46	93.68	75	75	85.53	84.72	86.89	71.79	64.29	83.61	67.65	61.11	65.38	48.28	74.47	69.77	71.79
5020	98.68	96.12	90.91	91.67	87.84	100	97.42	97.81	91.3	95.33	93.58	77.78	98.5	84.38	89.02	90.54	81.82	75.93	86.57	94.44	88.31	91.03	94	88.89	78.43	87.5	95.12	90.24	99.41	96.59	84.21	89.87	91.46	93.68	75	75	85.53	84.72	86.89	71.79	64.29	83.61	67.65	61.11	65.38	48.28	74.47	69.77	71.79
5040	98.68	96.12	90.91	91.67	87.84	100	97.42	97.81	91.3	95.33	93.58	77.78	98.5	84.38	89.02	91.89	81.82	75.93	86.57	94.44	88.31	91.03	94	88.89	78.43	87.5	95.12	90.24	99.41	96.59	84.21	89.87	91.46	93.68	75	75	85.53	84.72	88.52	71.79	64.29	83.61	67.65	61.11	65.38	48.28	74.47	69.77	71.79
5060	98.68	96.12	90.91	91.67	87.84	100	97.42	97.81	91.3	95.33	93.58	79.37	98.5	84.38	89.02	91.89	81.82	75.93	86.57	94.44	88.31	91.03	94	88.89	78.43	87.5	95.73	90.24	99.41	96.59	84.21	89.87	91.46	93.68	75	75	85.53	84.72	90.16	71.79	64.29	83.61	67.65	61.11	65.38	51.72	74.47	72.09	71.79
5080	98.68	96.12	90.91	91.67	87.84	100	97.42	97.81	91.3	95.33	93.58	79.37	98.5	84.38	89.02	91.89	81.82	75.93	86.57	94.44	88.31	91.03	94	88.89	78.43	87.5	95.73	90.24	99.41	96.59	84.21	89.87	91.46	93.68	75	75	85.53	84.72	90.16	71.79	64.29	83.61	67.65	61.11	65.38	51.72	74.47	74.42	74.36
5100	98.68	96.12	90.91	91.67	87.84	100	97.42	97.81	91.3	95.33	93.58	79.37	98.5	84.38	89.02	91.89	81.82	75.93	86.57	94.44	88.31	91.03	94	88.89	78.43	87.5	95.73	90.24	99.41	96.59	84.21	89.87	91.46	93.68	76.79	75	85.53	86.11	90.16	71.79	64.29	83.61	70.59	61.11	65.38	51.72	74.47	76.74	74.36
5120	98.68	96.12	90.91	91.67	87.84	100	97.42	97.81	91.3	95.33	93.58	79.37	98.5	84.38	89.02	91.89	81.82	75.93	86.57	94.44	88.31	91.03	94	88.89	78.43	87.5	95.73	90.24	99.41	96.59	84.21	89.87	91.46	93.68	76.79	75	85.53	86.11	90.16	71.79	64.29	83.61	70.59	61.11	65.38	51.72	74.47	76.74	74.36
5140	98.68	96.12	92.05	91.67	87.84	100	97.42	97.81	91.3	95.33	93.58	79.37	98.5	84.38	89.02	91.89	81.82	75.93	86.57	94.44	88.31	91.03	94	88.89	78.43	87.5	95.73	90.24	99.41	96.59	84.21	89.87	91.46	93.68	76.79	75	86.84	86.11	90.16	71.79	66.67	83.61	70.59	61.11	65.38	51.72	74.47	76.74	74.36
5160	98.68	96.12	92.05	91.67	87.84	100	97.42	98.54	91.3	95.33	93.58	79.37	98.5	84.38	89.02	91.89	81.82	75.93	86.57	94.44	88.31	91.03	94	88.89	78.43	87.5	96.34	91.46	99.41	96.59	84.21	89.87	91.46	93.68	78.57	75	86.84	86.11	90.16	71.79	66.67	83.61	70.59	61.11	65.38	51.72	74.47	76.74	74.36
5180	98.68	96.12	92.05	91.67	87.84	100	97.42	98.54	92.39	95.33	93.58	79.37	98.5	85.94	89.02	91.89	81.82	75.93	86.57	94.44	88.31	91.03	94	88.89	78.43	87.5	96.34	91.46	99.41	96.59	84.21	89.87	91.46	93.68	78.57	75	86.84	86.11	90.16	71.79	66.67	83.61	70.59	61.11	65.38	51.72	74.47	76.74	74.36
5200	98.68	96.12	92.05	92.86	87.84	100	97.42	98.54	92.39	96.26	93.58	79.37	98.5	85.94	89.02	91.89	81.82	75.93	86.57	94.44	88.31	92.31	94	88.89	78.43	87.5	96.34	91.46	99.41	97.73	84.21	89.87	91.46	93.68	78.57	75	86.84	86.11	90.16	71.79	66.67	83.61	70.59	61.11	65.38	51.72	74.47	76.74	74.36
5220	98.68	96.12	92.05	92.86	87.84	100	97.42	98.54	92.39	96.26	93.58	79.37	98.5	85.94	89.02	91.89	81.82	75.93	86.57	94.44	88.31	92.31	94	88.89	78.43	87.5	96.34	91.46	99.41	97.73	84.21	89.87	91.46	93.68	78.57	75	86.84	86.11	90.16	71.79	69.05	83.61	70.59	61.11	65.38	51.72	74.47	76.74	74.36
5240	98.68	96.12	92.05	92.86	87.84	100	97.42	98.54	92.39	96.26	93.58	79.37	98.5	85.94	89.02	91.89	83.64	75.93	86.57	94.44	88.31	92.31	94	88.89	78.43	87.5	96.34	91.46	99.41	97.73	84.21	89.87	91.46	93.68	78.57	75	86.84	86.11	90.16	71.79	69.05	83.61	70.59	61.11	65.38	51.72	74.47	76.74	74.36
5260	98.68	96.12	92.05	92.86	87.84	100	97.42	98.54	92.39	96.26	93.58	79.37	98.5	85.94	89.02	91.89	83.64	77.78	86.57	94.44	88.31	92.31	94	88.89	78.43	87.5	96.34	91.46	99.41	97.73	84.21	89.87	91.46	93.68	78.57	75	86.84	86.11	90.16	71.79	69.05	85.25	70.59	61.11	65.38	51.72	76.6	76.74	74.36
5280	98.68	96.12	93.18	92.86	87.84	100	97.42	98.54	92.39	96.26	93.58	80.95	98.5	85.94	90.24	91.89	83.64	79.63	86.57	95.06	88.31	92.31	94	88.89	78.43	87.5	96.34	93.9	99.41	97.73	84.21	89.87	91.46	93.68	78.57	75	86.84	86.11	90.16	71.79	69.05	85.25	70.59	61.11	65.38	51.72	76.6	76.74	74.36
5300	98.68	96.12	94.32	92.86	87.84	100	97.42	98.54	92.39	96.26	93.58	80.95	98.5	85.94	90.24	91.89	83.64	79.63	86.57	95.06	88.31	92.31	94	88.89	78.43	87.5	96.34	93.9	99.41	97.73	87.72	89.87	91.46	93.68	78.57	75	86.84	86.11	90.16	71.79	69.05	85.25	70.59	61.11	65.38	51.72	76.6	76.74	74.36
5320	98.68	96.12	95.45	92.86	87.84	100	97.42	98.54	92.39	96.26	93.58	80.95	98.5	85.94	90.24	91.89	83.64	79.63	86.57	95.06	88.31	92.31	94	88.89	78.43	87.5	96.34	93.9	99.41	97.73	87.72	89.87	91.46	93.68	78.57	75	86.84	86.11	90.16	71.79	69.05	85.25	70.59	61.11	65.38	51.72	76.6	76.74	76.92
5340	98.68	96.12	95.45	92.86	87.84	100	97.42	98.54	92.39	96.26	93.58	80.95	98.5	85.94	90.24	91.89	83.64	79.63	86.57	95.06	89.61	92.31	94	88.89	78.43	87.5	96.34	93.9	99.41	97.73	87.72	89.87	91.46	93.68	78.57	75	86.84	87.5	91.8	71.79	69.05	85.25	70.59	61.11	65.38	51.72	76.6	79.07	76.92
5360	98.68	96.12	95.45	92.86	87.84	100	97.42	98.54	92.39	96.26	93.58	80.95	98.5	85.94	90.24	91.89	83.64	79.63	86.57	95.06	89.61	92.31	94	88.89	78.43	87.5	96.34	93.9	99.41	97.73	87.72	89.87	91.46	93.68	78.57	75	86.84	87.5	91.8	71.79	69.05	85.25	70.59	61.11	65.38	51.72	76.6	79.07	76.92
5380	98.68	96.12	95.45	92.86	87.84	100	97.42	99.27	92.39	96.26	93.58	80.95	98.5	85.94	90.24	91.89	83.64	79.63	86.57	95.06	89.61	92.31	94	88.89	78.43	87.5	96.34	95.12	99.41	97.73	87.72	89.87	91.46	93.68	78.57	75	86.84	87.5	91.8	74.36	69.05	85.25	70.59	61.11	65.38	51.72	76.6	79.07	76.92
5400	98.68	96.12	95.45	92.86	87.84	100	97.42	99.27	92.39	96.26	93.58	80.95	98.5	85.94	90.24	91.89	83.64	79.63	86.57	95.06	89.61	93.59	94	88.89	78.43	87.5	96.34	95.12	99.41	97.73	87.72	89.87	91.46	93.68	78.57	75	86.84	87.5	91.8	74.36	69.05	85.25	70.59	61.11	65.38	51.72	76.6	79.07	76.92
5420	98.68	96.12	95.45	92.86	87.84	100	97.42	99.27	92.39	96.26	93.58	80.95	98.5	85.94	90.24	91.89	83.64	79.63	86.57	95.06	89.61	93.59	95	88.89	78.43	87.5	96.34	95.12	99.41	97.73	87.72	89.87	91.46	93.68	78.57	75	86.84	87.5	91.8	74.36	69.05	85.25	70.59	61.11	65.38	51.72	76.6	79.07	76.92
5440	98.68	96.12	95.45	92.86	87.84	100	97.42	99.27	92.39	96.26	93.58	80.95	98.5	85.94	90.24	91.89	83.64	79.63	86.57	95.06	89.61	93.59	95	88.89	78.43	87.5	96.34	96.34	99.41	97.73	87.72	89.87	91.46	93.68	78.57	76.92	86.84	88.89	91.8	74.36	69.05	85.25	70.59	61.11	65.38	51.72	76.6	79.07	76.92
5460	98.68	96.12	95.45	92.86	87.84	100	97.42	99.27	92.39	96.26	93.58	80.95	98.5	85.94	90.24	91.89	83.64	79.63	86.57	95.06	89.61	93.59	95	88.89	78.43	87.5	96.34	96.34	99.41	97.73	87.72	89.87	91.46	93.68	78.57	76.92	86.84	88.89	91.8	74.36	69.05	85.25	70.59	61.11	65.38	51.72	76.6	79.07	76.92
5480	98.68	96.12	95.45	92.86	87.84	100	97.42	99.27	92.39	96.26	93.58	80.95	98.5	85.94	90.24	91.89	83.64	79.63	86.57	95.06	89.61	93.59	95	88.89	78.43	87.5	96.34	96.34	99.41	97.73	87.72	89.87	91.46	93.68	78.57	76.92	86.84	88.89	91.8	74.36	69.05	85.25	70.59	61.11	65.38	51.72	76.6	79.07	76.92
5500	98.68	96.12	95.45	92.86	87.84	100	97.42	99.27	92.39	96.26	93.58	80.95	98.5	85.94	90.24	93.24	83.64	79.63	86.57	95.06	89.61	93.59	95	88.89	78.43	87.5	96.34	96.34	99.41	97.73	87.72	89.87	91.46	93.68	80.36	76.92	86.84	88.89	91.8	74.36	69.05	85.25	70.59	61.11	65.38	51.72	76.6	79.07	76.92
5520	98.68	96.12	95.45	92.86	87.84	100	97.42	99.27	92.39	96.26	94.5	80.95	98.5	87.5	90.24	93.24	83.64	79.63	88.06	95.06	89.61	93.59	96	88.89	78.43	87.5	96.34	97.56	99.41	97.73	87.72	89.87	91.46	93.68	80.36	76.92	86.84	88.89	91.8	76.92	69.05	85.25	70.59	61.11	65.38	51.72	76.6	79.07	76.92
5540	98.68	97.09	95.45	92.86	87.84	100	97.42	99.27	92.39	96.26	94.5	80.95	98.5	87.5	90.24	93.24	83.64	79.63	88.06	95.06	89.61	93.59	96	90.28	78.43	87.5	96.34	97.56	99.41	97.73	87.72	89.87	91.46	93.68	80.36	76.92	86.84	90.28	91.8	76.92	69.05	85.25	70.59	61.11	65.38	51.72	76.6	79.07	76.92
5560	98.68	97.09	95.45	92.86	87.84	100	97.42	99.27	92.39	96.26	95.41	80.95	98.5	87.5	90.24	93.24	83.64	79.63	88.06	95.06	89.61	93.59	96	90.28	78.43	89.06	96.34	97.56	99.41	98.86	87.72	89.87	91.46	93.68	82.14	76.92	86.84	90.28	91.8	76.92	69.05	85.25	70.59	61.11	65.38	51.72	76.6	79.07	76.92
5580	99.34	97.09	95.45	92.86	87.84	100	97.42	99.27	92.39	96.26	95.41	80.95	98.5	87.5	90.24	93.24	83.64	79.63	88.06	95.06	89.61	93.59	96	90.28	78.43	89.06	96.34	97.56	99.41	98.86	87.72	89.87	91.46	93.68	82.14	76.92	86.84	90.28	91.8	76.92	69.05	85.25	70.59	63.89	65.38	51.72	76.6	79.07	76.92
5600	99.34	97.09	95.45	92.86	87.84	100	98.06	99.27	92.39	96.26	95.41	80.95	98.5	87.5	90.24	93.24	83.64	81.48	88.06	95.06	89.61	93.59	96	90.28	78.43	89.06	96.34	97.56	99.41	98.86	87.72	89.87	91.46	93.68	82.14	76.92	86.84	90.28	91.8	76.92	69.05	85.25	70.59	63.89	65.38	51.72	76.6	79.07	76.92
5620	99.34	97.09	95.45	92.86	87.84	100	98.06	99.27	92.39	96.26	95.41	80.95	98.5	87.5	90.24	93.24	83.64	81.48	88.06	95.06	89.61	93.59	96	90.28	80.39	89.06	96.34	97.56	99.41	98.86	87.72	89.87	91.46	93.68	82.14	76.92	86.84	90.28	91.8	76.92	69.05	85.25	70.59	63.89	65.38	51.72	76.6	79.07	76.92
5640	99.34	97.09	95.45	92.86	87.84	100	98.06	99.27	92.39	96.26	95.41	80.95	98.5	87.5	90.24	93.24	83.64	81.48	88.06	95.06	89.61	93.59	96	90.28	80.39	89.06	96.34	97.56	99.41	98.86	87.72	89.87	91.46	93.68	82.14	76.92	86.84	90.28	91.8	79.49	69.05	85.25	70.59	63.89	65.38	51.72	76.6	79.07	76.92
5660	99.34	97.09	95.45	92.86	87.84	100	98.06	99.27	92.39	96.26	95.41	80.95	98.5	87.5	90.24	93.24	83.64	81.48	88.06	95.06	89.61	93.59	96	90.28	80.39	89.06	96.34	97.56	99.41	98.86	87.72	89.87	91.46	93.68	82.14	76.92	86.84	91.67	91.8	79.49	69.05	85.25	70.59	63.89	65.38	51.72	76.6	79.07	76.92
5680	99.34	97.09	95.45	92.86	87.84	100	98.06	99.27	92.39	96.26	95.41	80.95	98.5	87.5	90.24	93.24	83.64	81.48	88.06	95.06	89.61	94.87	96	90.28	80.39	89.06	96.34	97.56	99.41	98.86	87.72	89.87	92.68	93.68	82.14	76.92	86.84	91.67	91.8	79.49	69.05	85.25	70.59	63.89	65.38	51.72	76.6	79.07	76.92
5700	99.34	97.09	95.45	92.86	87.84	100	98.06	99.27	92.39	96.26	95.41	80.95	98.5	87.5	90.24	93.24	83.64	81.48	88.06	95.06	89.61	94.87	96	90.28	80.39	89.06	96.34	97.56	99.41	98.86	87.72	89.87	92.68	93.68	82.14	76.92	86.84	91.67	91.8	79.49	69.05	85.25	70.59	63.89	65.38	51.72	76.6	79.07	76.92
5720	99.34	97.09	95.45	92.86	87.84	100	98.06	99.27	92.39	96.26	95.41	80.95	98.5	87.5	90.24	93.24	83.64	81.48	91.04	95.06	89.61	94.87	96	90.28	80.39	89.06	96.34	97.56	99.41	98.86	87.72	89.87	92.68	93.68	82.14	76.92	86.84	91.67	91.8	79.49	69.05	85.25	70.59	63.89	65.38	51.72	76.6	79.07	76.92
5740	99.34	97.09	95.45	92.86	87.84	100	98.06	99.27	92.39	96.26	95.41	80.95	98.5	87.5	90.24	94.59	85.45	81.48	91.04	95.06	89.61	94.87	96	90.28	80.39	89.06	96.34	97.56	99.41	98.86	87.72	91.14	92.68	93.68	83.93	78.85	88.16	93.06	91.8	79.49	69.05	85.25	70.59	63.89	65.38	51.72	76.6	79.07	76.92
5760	99.34	97.09	95.45	92.86	87.84	100	98.06	99.27	92.39	96.26	95.41	80.95	98.5	87.5	90.24	94.59	85.45	83.33	91.04	95.06	89.61	94.87	96	90.28	80.39	89.06	96.34	97.56	99.41	98.86	87.72	91.14	92.68	93.68	83.93	78.85	88.16	93.06	91.8	79.49	69.05	85.25	70.59	63.89	65.38	55.17	76.6	79.07	76.92
5780	99.34	97.09	95.45	92.86	87.84	100	98.06	99.27	92.39	96.26	95.41	80.95	98.5	87.5	90.24	94.59	85.45	83.33	91.04	95.06	89.61	94.87	96	90.28	80.39	89.06	96.34	97.56	99.41	98.86	87.72	92.41	92.68	93.68	83.93	78.85	88.16	93.06	91.8	79.49	69.05	85.25	70.59	63.89	65.38	55.17	76.6	79.07	76.92
5800	99.34	97.09	95.45	92.86	87.84	100	98.06	100	92.39	96.26	95.41	80.95	98.5	87.5	90.24	94.59	85.45	85.19	91.04	95.06	89.61	94.87	96	90.28	80.39	89.06	96.34	97.56	99.41	98.86	87.72	92.41	92.68	93.68	83.93	78.85	88.16	93.06	91.8	79.49	69.05	85.25	70.59	63.89	65.38	55.17	76.6	79.07	76.92
5820	99.34	97.09	95.45	92.86	87.84	100	98.06	100	92.39	96.26	95.41	80.95	98.5	87.5	90.24	94.59	85.45	85.19	91.04	95.06	89.61	94.87	97	90.28	80.39	89.06	96.34	97.56	99.41	98.86	87.72	92.41	92.68	93.68	83.93	78.85	88.16	93.06	91.8	79.49	69.05	85.25	70.59	63.89	65.38	55.17	76.6	79.07	76.92
5840	99.34	97.09	95.45	94.05	87.84	100	98.06	100	92.39	96.26	96.33	82.54	98.5	87.5	90.24	94.59	85.45	85.19	91.04	95.06	89.61	94.87	97	90.28	80.39	89.06	96.34	97.56	99.41	98.86	87.72	92.41	92.68	93.68	85.71	78.85	88.16	93.06	91.8	79.49	69.05	85.25	70.59	63.89	65.38	55.17	76.6	79.07	76.92
5860	99.34	97.09	95.45	94.05	87.84	100	98.06	100	93.48	96.26	96.33	82.54	98.5	87.5	90.24	94.59	85.45	85.19	91.04	95.06	89.61	94.87	97	90.28	80.39	89.06	96.34	97.56	99.41	98.86	87.72	92.41	92.68	93.68	85.71	78.85	88.16	93.06	91.8	79.49	69.05	85.25	70.59	63.89	65.38	55.17	76.6	79.07	76.92
5880	99.34	97.09	95.45	94.05	87.84	100	98.06	100	93.48	96.26	96.33	82.54	98.5	87.5	90.24	94.59	85.45	85.19	91.04	95.06	90.91	94.87	97	90.28	82.35	89.06	96.95	97.56	99.41	98.86	87.72	92.41	92.68	93.68	85.71	78.85	88.16	93.06	91.8	79.49	69.05	85.25	70.59	63.89	65.38	55.17	78.72	79.07	76.92
5900	99.34	97.09	95.45	94.05	87.84	100	98.06	100	94.57	96.26	96.33	82.54	98.5	87.5	90.24	94.59	85.45	85.19	91.04	95.06	90.91	94.87	97	90.28	82.35	89.06	96.95	97.56	99.41	98.86	87.72	92.41	92.68	93.68	85.71	78.85	88.16	93.06	91.8	79.49	69.05	85.25	70.59	63.89	65.38	55.17	78.72	79.07	76.92
5920	99.34	97.09	95.45	94.05	87.84	100	98.06	100	94.57	97.2	96.33	82.54	98.5	87.5	90.24	94.59	85.45	85.19	91.04	95.06	90.91	94.87	97	90.28	82.35	90.63	96.95	97.56	99.41	98.86	87.72	92.41	92.68	93.68	85.71	78.85	88.16	93.06	91.8	79.49	69.05	85.25	70.59	63.89	65.38	55.17	78.72	79.07	76.92
5940	99.34	97.09	95.45	94.05	87.84	100	98.06	100	94.57	97.2	96.33	82.54	98.5	87.5	90.24	94.59	85.45	85.19	91.04	95.06	90.91	94.87	97	91.67	82.35	90.63	96.95	97.56	99.41	98.86	87.72	92.41	92.68	93.68	85.71	78.85	88.16	93.06	91.8	79.49	69.05	85.25	70.59	63.89	65.38	55.17	78.72	79.07	79.49
5960	99.34	97.09	95.45	94.05	87.84	100	98.06	100	94.57	97.2	96.33	82.54	98.5	87.5	90.24	94.59	85.45	85.19	91.04	95.06	90.91	94.87	97	91.67	82.35	90.63	96.95	97.56	99.41	98.86	87.72	92.41	92.68	93.68	85.71	78.85	88.16	93.06	91.8	79.49	71.43	85.25	70.59	63.89	69.23	55.17	78.72	79.07	79.49
5980	99.34	97.09	95.45	95.24	87.84	100	98.06	100	94.57	97.2	96.33	82.54	98.5	87.5	90.24	94.59	85.45	85.19	91.04	95.06	90.91	94.87	97	91.67	82.35	90.63	96.95	97.56	99.41	98.86	87.72	92.41	92.68	94.74	85.71	78.85	88.16	93.06	91.8	79.49	71.43	85.25	70.59	63.89	69.23	55.17	78.72	79.07	79.49
6000	99.34	97.09	95.45	95.24	87.84	100	98.71	100	94.57	97.2	96.33	82.54	98.5	87.5	90.24	95.95	85.45	85.19	91.04	95.06	90.91	94.87	97	91.67	82.35	90.63	96.95	97.56	99.41	98.86	87.72	92.41	92.68	94.74	85.71	78.85	88.16	93.06	91.8	79.49	71.43	85.25	70.59	63.89	69.23	58.62	78.72	79.07	79.49
6020	99.34	97.09	95.45	95.24	87.84	100	98.71	100	94.57	97.2	96.33	82.54	98.5	87.5	90.24	95.95	85.45	85.19	91.04	95.06	90.91	94.87	97	91.67	82.35	90.63	96.95	97.56	99.41	98.86	87.72	92.41	92.68	94.74	85.71	78.85	88.16	93.06	91.8	79.49	71.43	85.25	70.59	63.89	69.23	58.62	78.72	79.07	79.49
6040	99.34	97.09	95.45	95.24	87.84	100	98.71	100	94.57	97.2	96.33	82.54	98.5	87.5	90.24	95.95	85.45	85.19	91.04	95.68	90.91	94.87	97	91.67	82.35	90.63	96.95	97.56	99.41	98.86	87.72	92.41	92.68	94.74	85.71	78.85	88.16	93.06	91.8	79.49	71.43	85.25	70.59	63.89	69.23	58.62	78.72	79.07	79.49
6060	99.34	97.09	95.45	95.24	87.84	100	98.71	100	94.57	97.2	96.33	85.71	98.5	87.5	90.24	95.95	85.45	85.19	91.04	95.68	90.91	94.87	97	91.67	82.35	90.63	96.95	97.56	99.41	98.86	87.72	92.41	92.68	94.74	85.71	78.85	88.16	93.06	91.8	79.49	71.43	85.25	70.59	63.89	69.23	58.62	78.72	79.07	79.49
6080	99.34	97.09	95.45	95.24	87.84	100	98.71	100	94.57	97.2	96.33	85.71	99.25	89.06	90.24	95.95	85.45	85.19	91.04	96.3	90.91	94.87	97	91.67	82.35	90.63	96.95	97.56	99.41	98.86	87.72	92.41	92.68	94.74	87.5	78.85	88.16	93.06	91.8	79.49	71.43	85.25	70.59	63.89	69.23	58.62	78.72	79.07	79.49
6100	99.34	97.09	95.45	95.24	87.84	100	98.71	100	94.57	97.2	96.33	85.71	99.25	89.06	90.24	95.95	85.45	85.19	91.04	96.3	90.91	94.87	97	91.67	82.35	90.63	96.95	97.56	99.41	98.86	87.72	92.41	92.68	94.74	87.5	78.85	88.16	94.44	91.8	79.49	71.43	85.25	70.59	63.89	69.23	58.62	78.72	79.07	79.49
6120	99.34	97.09	95.45	95.24	89.19	100	99.35	100	94.57	97.2	96.33	85.71	99.25	89.06	91.46	95.95	85.45	85.19	91.04	96.3	90.91	94.87	97	91.67	82.35	90.63	96.95	97.56	99.41	98.86	87.72	92.41	92.68	94.74	87.5	78.85	88.16	94.44	91.8	79.49	71.43	85.25	70.59	63.89	69.23	58.62	78.72	79.07	79.49
6140	99.34	97.09	95.45	95.24	89.19	100	99.35	100	94.57	97.2	96.33	85.71	99.25	89.06	91.46	95.95	85.45	85.19	91.04	96.3	90.91	94.87	97	91.67	82.35	90.63	96.95	97.56	99.41	98.86	87.72	92.41	92.68	94.74	87.5	78.85	88.16	94.44	91.8	79.49	71.43	86.89	70.59	63.89	69.23	58.62	78.72	83.72	79.49
6160	99.34	97.09	95.45	95.24	89.19	100	99.35	100	94.57	97.2	96.33	85.71	99.25	89.06	91.46	95.95	85.45	85.19	91.04	96.3	90.91	94.87	97	91.67	82.35	90.63	96.95	97.56	99.41	98.86	87.72	92.41	92.68	94.74	87.5	80.77	88.16	94.44	91.8	79.49	71.43	86.89	70.59	63.89	69.23	58.62	78.72	83.72	79.49
6180	99.34	97.09	95.45	95.24	89.19	100	99.35	100	94.57	97.2	96.33	85.71	99.25	89.06	91.46	95.95	85.45	85.19	91.04	96.3	90.91	94.87	97	91.67	82.35	90.63	96.95	97.56	99.41	98.86	87.72	92.41	92.68	94.74	87.5	80.77	88.16	94.44	91.8	79.49	71.43	86.89	70.59	63.89	69.23	58.62	78.72	83.72	79.49
6200	99.34	97.09	95.45	95.24	89.19	100	99.35	100	94.57	97.2	96.33	85.71	99.25	89.06	91.46	95.95	85.45	85.19	91.04	96.3	90.91	94.87	97	91.67	82.35	90.63	96.95	97.56	99.41	98.86	89.47	92.41	92.68	94.74	87.5	80.77	88.16	94.44	91.8	79.49	71.43	86.89	70.59	63.89	69.23	58.62	78.72	83.72	79.49
6220	99.34	97.09	95.45	95.24	89.19	100	99.35	100	94.57	97.2	96.33	85.71	99.25	89.06	91.46	95.95	85.45	85.19	91.04	96.3	90.91	94.87	97	91.67	82.35	90.63	96.95	97.56	99.41	98.86	89.47	92.41	92.68	94.74	87.5	80.77	88.16	94.44	91.8	79.49	71.43	86.89	70.59	63.89	69.23	58.62	78.72	83.72	79.49
6240	99.34	97.09	95.45	95.24	89.19	100	99.35	100	94.57	97.2	96.33	85.71	99.25	89.06	92.68	95.95	85.45	85.19	91.04	96.3	90.91	94.87	97	91.67	82.35	90.63	96.95	97.56	99.41	98.86	89.47	92.41	92.68	94.74	87.5	80.77	88.16	94.44	91.8	79.49	71.43	86.89	70.59	63.89	69.23	58.62	78.72	88.37	79.49
6260	99.34	97.09	95.45	96.43	90.54	100	99.35	100	94.57	97.2	96.33	85.71	99.25	89.06	92.68	95.95	85.45	85.19	91.04	96.3	90.91	94.87	97	93.06	82.35	90.63	96.95	97.56	99.41	98.86	89.47	92.41	92.68	94.74	87.5	80.77	88.16	94.44	91.8	79.49	71.43	86.89	70.59	63.89	69.23	58.62	78.72	88.37	79.49
6280	99.34	97.09	95.45	96.43	90.54	100	99.35	100	94.57	98.13	96.33	85.71	99.25	89.06	92.68	95.95	85.45	85.19	91.04	96.3	90.91	94.87	97	93.06	82.35	90.63	96.95	97.56	99.41	98.86	89.47	92.41	92.68	94.74	87.5	80.77	88.16	94.44	91.8	79.49	71.43	86.89	70.59	63.89	69.23	58.62	78.72	88.37	79.49
6300	99.34	97.09	95.45	96.43	90.54	100	99.35	100	94.57	98.13	96.33	85.71	99.25	89.06	92.68	95.95	85.45	85.19	91.04	96.3	90.91	94.87	97	93.06	84.31	90.63	96.95	97.56	99.41	98.86	89.47	92.41	92.68	94.74	87.5	82.69	88.16	94.44	91.8	79.49	71.43	86.89	70.59	63.89	69.23	58.62	80.85	88.37	79.49
6320	99.34	97.09	95.45	96.43	90.54	100	99.35	100	94.57	98.13	96.33	85.71	99.25	89.06	92.68	95.95	85.45	85.19	91.04	96.3	90.91	94.87	97	93.06	84.31	90.63	97.56	97.56	99.41	98.86	89.47	92.41	92.68	94.74	87.5	82.69	88.16	94.44	93.44	79.49	71.43	86.89	73.53	63.89	69.23	58.62	80.85	88.37	79.49
6340	99.34	97.09	95.45	96.43	90.54	100	99.35	100	94.57	98.13	96.33	85.71	99.25	89.06	92.68	95.95	85.45	85.19	91.04	96.3	90.91	94.87	97	93.06	84.31	90.63	97.56	97.56	99.41	98.86	89.47	92.41	92.68	94.74	87.5	82.69	88.16	94.44	93.44	79.49	71.43	86.89	73.53	63.89	69.23	58.62	80.85	88.37	79.49
6360	99.34	97.09	95.45	96.43	90.54	100	99.35	100	94.57	98.13	96.33	85.71	99.25	89.06	92.68	95.95	85.45	85.19	91.04	96.3	90.91	94.87	97	93.06	84.31	90.63	98.17	97.56	99.41	98.86	89.47	92.41	92.68	94.74	89.29	82.69	88.16	94.44	93.44	79.49	71.43	86.89	73.53	63.89	69.23	58.62	80.85	88.37	79.49
6380	99.34	97.09	95.45	96.43	90.54	100	99.35	100	94.57	98.13	96.33	85.71	99.25	89.06	92.68	95.95	87.27	85.19	91.04	96.3	90.91	94.87	97	93.06	84.31	90.63	98.17	97.56	99.41	98.86	89.47	92.41	92.68	94.74	89.29	82.69	88.16	94.44	93.44	79.49	71.43	86.89	73.53	66.67	69.23	58.62	80.85	88.37	79.49
6400	99.34	97.09	95.45	96.43	90.54	100	99.35	100	94.57	98.13	96.33	85.71	99.25	89.06	92.68	95.95	87.27	85.19	91.04	96.91	90.91	94.87	97	93.06	84.31	90.63	98.17	97.56	99.41	98.86	89.47	92.41	92.68	94.74	89.29	82.69	88.16	94.44	93.44	79.49	71.43	86.89	73.53	66.67	69.23	58.62	80.85	88.37	79.49
6420	99.34	97.09	95.45	96.43	90.54	100	99.35	100	94.57	98.13	96.33	85.71	99.25	89.06	92.68	95.95	87.27	85.19	91.04	96.91	90.91	94.87	97	93.06	84.31	90.63	98.17	97.56	99.41	98.86	89.47	93.67	92.68	94.74	89.29	82.69	88.16	94.44	93.44	79.49	71.43	86.89	73.53	66.67	69.23	58.62	80.85	88.37	79.49
6440	99.34	97.09	95.45	96.43	90.54	100	99.35	100	94.57	98.13	96.33	85.71	99.25	90.63	92.68	95.95	87.27	85.19	92.54	96.91	90.91	94.87	97	93.06	84.31	90.63	98.17	97.56	99.41	98.86	89.47	93.67	92.68	94.74	89.29	82.69	88.16	94.44	93.44	79.49	71.43	88.52	73.53	66.67	69.23	58.62	80.85	88.37	79.49
6460	99.34	97.09	95.45	96.43	90.54	100	99.35	100	94.57	98.13	96.33	87.3	99.25	90.63	92.68	95.95	87.27	85.19	92.54	96.91	92.21	94.87	97	93.06	84.31	90.63	98.17	97.56	99.41	98.86	89.47	93.67	92.68	94.74	89.29	84.62	88.16	94.44	93.44	79.49	71.43	88.52	73.53	66.67	69.23	58.62	80.85	88.37	79.49
6480	99.34	97.09	95.45	96.43	90.54	100	99.35	100	95.65	98.13	96.33	87.3	99.25	90.63	92.68	95.95	87.27	85.19	92.54	96.91	92.21	94.87	97	93.06	84.31	90.63	98.17	97.56	99.41	98.86	89.47	93.67	92.68	94.74	89.29	86.54	88.16	94.44	93.44	79.49	71.43	88.52	73.53	66.67	69.23	58.62	80.85	88.37	79.49
6500	99.34	97.09	95.45	96.43	90.54	100	99.35	100	95.65	98.13	96.33	87.3	99.25	90.63	92.68	95.95	87.27	85.19	92.54	96.91	92.21	94.87	97	93.06	84.31	90.63	98.17	97.56	99.41	98.86	89.47	93.67	92.68	94.74	89.29	86.54	90.79	94.44	93.44	79.49	71.43	88.52	73.53	66.67	69.23	58.62	80.85	88.37	79.49
6520	99.34	97.09	95.45	96.43	90.54	100	99.35	100	95.65	98.13	96.33	87.3	99.25	90.63	92.68	95.95	87.27	87.04	92.54	96.91	92.21	94.87	97	94.44	84.31	90.63	98.78	97.56	99.41	98.86	89.47	93.67	92.68	94.74	89.29	86.54	90.79	94.44	93.44	79.49	71.43	88.52	73.53	66.67	69.23	58.62	80.85	88.37	79.49
6540	99.34	97.09	95.45	96.43	90.54	100	99.35	100	95.65	98.13	96.33	87.3	99.25	90.63	92.68	95.95	87.27	87.04	92.54	96.91	92.21	96.15	98	94.44	84.31	90.63	98.78	97.56	99.41	98.86	89.47	93.67	92.68	94.74	89.29	86.54	90.79	94.44	93.44	79.49	71.43	88.52	73.53	66.67	69.23	58.62	80.85	88.37	79.49
6560	99.34	97.09	95.45	96.43	90.54	100	99.35	100	95.65	98.13	96.33	88.89	99.25	90.63	92.68	95.95	87.27	87.04	92.54	96.91	92.21	96.15	98	94.44	84.31	90.63	98.78	97.56	99.41	98.86	89.47	93.67	92.68	94.74	89.29	86.54	90.79	94.44	93.44	79.49	73.81	88.52	73.53	66.67	69.23	58.62	80.85	88.37	79.49
6580	99.34	97.09	95.45	96.43	90.54	100	99.35	100	95.65	98.13	96.33	88.89	99.25	90.63	92.68	95.95	87.27	87.04	92.54	96.91	93.51	96.15	98	94.44	84.31	90.63	98.78	97.56	99.41	98.86	89.47	93.67	92.68	94.74	89.29	86.54	90.79	94.44	93.44	79.49	73.81	88.52	76.47	66.67	69.23	58.62	80.85	88.37	82.05
6600	99.34	97.09	95.45	96.43	90.54	100	99.35	100	95.65	98.13	96.33	88.89	99.25	90.63	92.68	95.95	87.27	87.04	92.54	96.91	93.51	96.15	98	94.44	84.31	90.63	98.78	97.56	99.41	98.86	89.47	93.67	92.68	94.74	89.29	86.54	90.79	94.44	93.44	79.49	73.81	88.52	82.35	66.67	69.23	58.62	80.85	88.37	82.05
6620	99.34	97.09	95.45	96.43	90.54	100	99.35	100	95.65	98.13	96.33	88.89	99.25	90.63	92.68	95.95	87.27	87.04	92.54	96.91	93.51	96.15	98	94.44	86.27	90.63	98.78	97.56	99.41	98.86	89.47	94.94	92.68	94.74	89.29	86.54	90.79	94.44	93.44	79.49	73.81	88.52	82.35	66.67	69.23	58.62	80.85	88.37	82.05
6640	99.34	97.09	95.45	96.43	91.89	100	99.35	100	95.65	98.13	96.33	88.89	99.25	90.63	92.68	95.95	87.27	87.04	92.54	96.91	93.51	96.15	98	94.44	86.27	90.63	98.78	97.56	99.41	98.86	89.47	94.94	92.68	94.74	89.29	86.54	90.79	94.44	95.08	79.49	73.81	88.52	82.35	66.67	69.23	58.62	80.85	88.37	82.05
6660	99.34	97.09	95.45	96.43	91.89	100	99.35	100	96.74	98.13	96.33	88.89	99.25	90.63	92.68	95.95	87.27	87.04	92.54	96.91	93.51	96.15	98	94.44	86.27	90.63	98.78	97.56	99.41	98.86	89.47	94.94	92.68	95.79	89.29	86.54	90.79	94.44	95.08	79.49	73.81	88.52	82.35	69.44	69.23	58.62	80.85	88.37	82.05
6680	99.34	97.09	95.45	96.43	91.89	100	99.35	100	96.74	98.13	96.33	88.89	99.25	90.63	92.68	95.95	87.27	87.04	92.54	96.91	93.51	96.15	98	94.44	86.27	90.63	98.78	97.56	99.41	98.86	89.47	94.94	92.68	95.79	89.29	86.54	90.79	94.44	95.08	79.49	73.81	88.52	82.35	69.44	69.23	58.62	80.85	88.37	82.05
6700	99.34	97.09	95.45	96.43	91.89	100	99.35	100	96.74	98.13	96.33	88.89	99.25	90.63	92.68	95.95	87.27	87.04	92.54	96.91	93.51	96.15	98	94.44	86.27	90.63	98.78	97.56	99.41	98.86	89.47	94.94	92.68	95.79	89.29	86.54	90.79	94.44	95.08	79.49	73.81	88.52	82.35	69.44	69.23	58.62	80.85	88.37	82.05
6720	99.34	97.09	95.45	96.43	91.89	100	99.35	100	96.74	98.13	96.33	88.89	99.25	90.63	92.68	95.95	87.27	87.04	92.54	96.91	93.51	96.15	98	94.44	86.27	90.63	98.78	97.56	99.41	98.86	89.47	94.94	92.68	95.79	89.29	86.54	92.11	94.44	95.08	79.49	73.81	88.52	82.35	69.44	69.23	58.62	80.85	88.37	82.05
6740	99.34	97.09	95.45	96.43	91.89	100	99.35	100	96.74	98.13	96.33	88.89	99.25	90.63	92.68	95.95	87.27	87.04	92.54	96.91	93.51	96.15	98	94.44	86.27	90.63	98.78	97.56	99.41	98.86	89.47	94.94	92.68	95.79	91.07	86.54	92.11	95.83	95.08	79.49	73.81	88.52	82.35	69.44	69.23	58.62	80.85	88.37	82.05
6760	99.34	97.09	95.45	96.43	91.89	100	99.35	100	96.74	98.13	96.33	88.89	99.25	90.63	92.68	95.95	87.27	87.04	92.54	96.91	93.51	96.15	98	94.44	86.27	90.63	98.78	97.56	99.41	98.86	89.47	94.94	92.68	95.79	91.07	86.54	92.11	95.83	95.08	79.49	73.81	88.52	82.35	69.44	69.23	58.62	80.85	88.37	82.05
6780	99.34	97.09	95.45	96.43	91.89	100	99.35	100	96.74	98.13	96.33	88.89	99.25	90.63	92.68	95.95	87.27	87.04	92.54	96.91	93.51	96.15	98	94.44	86.27	90.63	98.78	97.56	99.41	98.86	89.47	94.94	92.68	95.79	91.07	86.54	92.11	95.83	95.08	79.49	73.81	88.52	82.35	69.44	69.23	58.62	80.85	88.37	82.05
6800	99.34	97.09	95.45	96.43	91.89	100	99.35	100	96.74	98.13	96.33	88.89	99.25	90.63	92.68	95.95	87.27	87.04	92.54	96.91	93.51	96.15	98	94.44	86.27	90.63	98.78	97.56	99.41	98.86	89.47	94.94	92.68	95.79	91.07	86.54	92.11	95.83	95.08	79.49	73.81	88.52	82.35	69.44	69.23	58.62	80.85	88.37	82.05
6820	99.34	97.09	95.45	96.43	91.89	100	100	100	96.74	98.13	96.33	88.89	99.25	90.63	93.9	95.95	87.27	87.04	92.54	96.91	93.51	96.15	98	94.44	86.27	90.63	98.78	97.56	99.41	98.86	89.47	94.94	92.68	95.79	91.07	86.54	92.11	95.83	95.08	79.49	73.81	88.52	82.35	69.44	69.23	58.62	80.85	88.37	82.05
6840	99.34	97.09	95.45	96.43	91.89	100	100	100	96.74	98.13	96.33	88.89	99.25	90.63	93.9	95.95	87.27	87.04	92.54	96.91	93.51	96.15	98	94.44	86.27	90.63	98.78	97.56	99.41	98.86	89.47	94.94	92.68	95.79	91.07	86.54	92.11	95.83	95.08	79.49	73.81	88.52	82.35	69.44	69.23	58.62	80.85	88.37	82.05
6860	99.34	97.09	95.45	96.43	91.89	100	100	100	96.74	98.13	96.33	88.89	99.25	90.63	93.9	95.95	87.27	87.04	92.54	96.91	93.51	96.15	98	95.83	86.27	90.63	98.78	97.56	99.41	98.86	89.47	94.94	92.68	95.79	91.07	86.54	92.11	95.83	95.08	79.49	73.81	88.52	82.35	69.44	69.23	58.62	80.85	88.37	82.05
6880	99.34	97.09	95.45	96.43	91.89	100	100	100	96.74	98.13	96.33	88.89	99.25	90.63	93.9	95.95	87.27	87.04	94.03	97.53	93.51	96.15	98	95.83	86.27	90.63	98.78	97.56	99.41	98.86	89.47	94.94	92.68	95.79	91.07	86.54	92.11	95.83	95.08	79.49	73.81	88.52	82.35	69.44	69.23	58.62	80.85	88.37	82.05
6900	99.34	97.09	95.45	96.43	91.89	100	100	100	96.74	98.13	96.33	88.89	99.25	90.63	93.9	95.95	87.27	87.04	94.03	97.53	93.51	96.15	98	95.83	86.27	90.63	98.78	97.56	99.41	98.86	89.47	94.94	92.68	95.79	91.07	88.46	93.42	95.83	95.08	79.49	73.81	88.52	82.35	69.44	69.23	58.62	80.85	88.37	82.05
6920	99.34	97.09	95.45	96.43	93.24	100	100	100	96.74	98.13	96.33	88.89	99.25	90.63	93.9	95.95	90.91	87.04	94.03	97.53	93.51	96.15	98	95.83	86.27	90.63	98.78	97.56	99.41	98.86	89.47	94.94	92.68	95.79	91.07	88.46	93.42	95.83	95.08	79.49	73.81	88.52	82.35	69.44	69.23	58.62	80.85	88.37	82.05
6940	99.34	97.09	95.45	96.43	93.24	100	100	100	96.74	98.13	96.33	88.89	99.25	90.63	93.9	95.95	90.91	87.04	94.03	97.53	93.51	96.15	98	95.83	88.24	90.63	98.78	97.56	99.41	98.86	89.47	94.94	92.68	95.79	91.07	88.46	93.42	95.83	95.08	79.49	73.81	88.52	82.35	69.44	69.23	58.62	80.85	88.37	82.05
6960	99.34	97.09	95.45	96.43	93.24	100	100	100	96.74	98.13	96.33	88.89	99.25	90.63	93.9	95.95	90.91	87.04	94.03	97.53	93.51	96.15	98	95.83	88.24	90.63	98.78	97.56	99.41	98.86	89.47	94.94	92.68	95.79	91.07	88.46	93.42	95.83	95.08	79.49	73.81	88.52	82.35	72.22	73.08	58.62	80.85	88.37	82.05
6980	99.34	97.09	95.45	96.43	94.59	100	100	100	96.74	98.13	96.33	88.89	99.25	90.63	93.9	95.95	90.91	87.04	94.03	97.53	93.51	96.15	98	95.83	88.24	90.63	98.78	97.56	99.41	98.86	89.47	94.94	92.68	95.79	91.07	88.46	93.42	95.83	95.08	79.49	76.19	88.52	82.35	72.22	73.08	58.62	80.85	88.37	82.05
7000	99.34	97.09	95.45	96.43	94.59	100	100	100	96.74	98.13	96.33	88.89	99.25	90.63	93.9	95.95	90.91	87.04	94.03	97.53	93.51	96.15	98	95.83	88.24	90.63	98.78	97.56	99.41	98.86	89.47	94.94	92.68	95.79	91.07	88.46	93.42	95.83	95.08	79.49	76.19	88.52	82.35	72.22	73.08	58.62	80.85	88.37	82.05
7020	99.34	98.06	95.45	96.43	94.59	100	100	100	96.74	98.13	96.33	88.89	99.25	90.63	93.9	95.95	90.91	87.04	94.03	97.53	93.51	96.15	98	95.83	88.24	90.63	98.78	97.56	99.41	98.86	89.47	94.94	92.68	95.79	91.07	88.46	93.42	95.83	95.08	79.49	76.19	88.52	82.35	72.22	73.08	58.62	80.85	88.37	82.05
7040	99.34	98.06	95.45	96.43	94.59	100	100	100	96.74	98.13	96.33	88.89	99.25	90.63	93.9	95.95	90.91	87.04	94.03	97.53	93.51	96.15	98	95.83	90.2	90.63	98.78	97.56	99.41	98.86	89.47	94.94	92.68	95.79	91.07	88.46	93.42	95.83	95.08	79.49	76.19	88.52	82.35	72.22	73.08	58.62	82.98	88.37	82.05
7060	99.34	98.06	95.45	96.43	95.95	100	100	100	96.74	98.13	96.33	88.89	99.25	90.63	93.9	95.95	90.91	87.04	94.03	97.53	93.51	96.15	98	95.83	90.2	90.63	98.78	97.56	99.41	98.86	89.47	94.94	92.68	95.79	91.07	88.46	93.42	95.83	95.08	79.49	76.19	88.52	82.35	72.22	73.08	58.62	82.98	88.37	82.05
7080	99.34	98.06	95.45	96.43	95.95	100	100	100	96.74	98.13	96.33	88.89	99.25	90.63	93.9	95.95	90.91	87.04	94.03	97.53	93.51	96.15	98	95.83	90.2	90.63	98.78	97.56	99.41	98.86	89.47	94.94	92.68	95.79	91.07	88.46	93.42	95.83	95.08	79.49	76.19	88.52	82.35	72.22	73.08	58.62	82.98	88.37	82.05
7100	99.34	98.06	95.45	96.43	95.95	100	100	100	96.74	98.13	96.33	88.89	99.25	90.63	93.9	95.95	90.91	87.04	94.03	98.15	93.51	96.15	98	95.83	90.2	90.63	98.78	97.56	99.41	98.86	89.47	94.94	92.68	95.79	91.07	88.46	93.42	95.83	95.08	79.49	76.19	88.52	82.35	72.22	73.08	58.62	82.98	88.37	82.05
7120	99.34	98.06	95.45	96.43	95.95	100	100	100	96.74	98.13	96.33	90.48	99.25	92.19	93.9	95.95	90.91	87.04	94.03	98.15	93.51	96.15	98	95.83	90.2	90.63	98.78	97.56	99.41	98.86	89.47	94.94	92.68	95.79	91.07	88.46	93.42	95.83	95.08	79.49	76.19	88.52	82.35	72.22	73.08	58.62	82.98	88.37	82.05
7140	99.34	98.06	95.45	96.43	95.95	100	100	100	96.74	98.13	96.33	90.48	99.25	92.19	93.9	95.95	90.91	87.04	94.03	98.15	93.51	96.15	98	95.83	90.2	90.63	98.78	97.56	99.41	98.86	89.47	94.94	92.68	95.79	91.07	88.46	93.42	95.83	95.08	79.49	76.19	88.52	82.35	72.22	73.08	58.62	82.98	88.37	82.05
7160	99.34	98.06	95.45	96.43	95.95	100	100	100	96.74	98.13	97.25	90.48	99.25	92.19	93.9	95.95	90.91	87.04	94.03	98.15	93.51	96.15	98	95.83	90.2	90.63	98.78	97.56	99.41	98.86	89.47	94.94	93.9	95.79	91.07	88.46	94.74	95.83	95.08	79.49	76.19	88.52	82.35	72.22	73.08	58.62	82.98	88.37	82.05
7180	99.34	98.06	95.45	96.43	95.95	100	100	100	96.74	98.13	97.25	90.48	99.25	92.19	93.9	95.95	90.91	87.04	94.03	98.15	93.51	96.15	98	95.83	90.2	90.63	98.78	97.56	99.41	98.86	89.47	94.94	93.9	95.79	91.07	88.46	94.74	95.83	95.08	79.49	78.57	88.52	82.35	72.22	73.08	58.62	82.98	88.37	82.05
7200	99.34	98.06	95.45	96.43	95.95	100	100	100	96.74	98.13	97.25	90.48	99.25	92.19	93.9	95.95	90.91	87.04	94.03	98.15	94.81	96.15	98	95.83	90.2	90.63	98.78	97.56	99.41	98.86	89.47	94.94	93.9	95.79	91.07	88.46	94.74	95.83	95.08	82.05	78.57	88.52	82.35	72.22	73.08	58.62	85.11	88.37	82.05
7220	99.34	98.06	95.45	96.43	95.95	100	100	100	96.74	98.13	97.25	90.48	99.25	92.19	93.9	95.95	90.91	87.04	94.03	98.15	94.81	96.15	98	95.83	90.2	90.63	98.78	97.56	99.41	98.86	89.47	94.94	93.9	95.79	91.07	88.46	94.74	95.83	95.08	82.05	78.57	88.52	82.35	72.22	73.08	58.62	85.11	88.37	82.05
7240	99.34	98.06	95.45	96.43	95.95	100	100	100	97.83	98.13	97.25	90.48	99.25	92.19	93.9	95.95	90.91	87.04	94.03	98.15	94.81	96.15	98	95.83	90.2	90.63	98.78	97.56	99.41	98.86	89.47	94.94	93.9	95.79	91.07	88.46	94.74	95.83	95.08	82.05	78.57	88.52	82.35	72.22	73.08	58.62	85.11	88.37	82.05
7260	99.34	98.06	95.45	96.43	95.95	100	100	100	97.83	98.13	97.25	90.48	99.25	92.19	93.9	97.3	90.91	87.04	94.03	98.15	94.81	96.15	98	95.83	90.2	90.63	98.78	97.56	99.41	98.86	89.47	94.94	93.9	95.79	91.07	88.46	94.74	95.83	95.08	82.05	80.95	88.52	82.35	72.22	73.08	58.62	85.11	88.37	82.05
7280	99.34	98.06	95.45	96.43	97.3	100	100	100	97.83	98.13	97.25	90.48	99.25	92.19	93.9	97.3	90.91	87.04	94.03	98.15	94.81	96.15	98	95.83	90.2	90.63	98.78	97.56	99.41	98.86	89.47	94.94	93.9	95.79	91.07	88.46	94.74	95.83	95.08	82.05	80.95	88.52	82.35	72.22	73.08	58.62	85.11	88.37	82.05
7300	99.34	98.06	95.45	96.43	97.3	100	100	100	97.83	98.13	97.25	90.48	99.25	92.19	93.9	97.3	90.91	87.04	94.03	98.15	94.81	96.15	98	95.83	90.2	90.63	98.78	97.56	100	98.86	89.47	94.94	93.9	95.79	91.07	88.46	94.74	95.83	95.08	82.05	80.95	88.52	82.35	72.22	73.08	58.62	85.11	88.37	82.05
7320	99.34	98.06	95.45	96.43	97.3	100	100	100	97.83	98.13	97.25	90.48	99.25	92.19	93.9	97.3	90.91	87.04	94.03	98.15	94.81	96.15	98	95.83	90.2	90.63	98.78	97.56	100	98.86	89.47	94.94	93.9	95.79	91.07	88.46	94.74	95.83	95.08	82.05	80.95	88.52	82.35	72.22	73.08	58.62	85.11	88.37	82.05
7340	99.34	98.06	95.45	96.43	97.3	100	100	100	97.83	98.13	97.25	92.06	99.25	92.19	93.9	97.3	90.91	87.04	94.03	98.15	94.81	96.15	98	95.83	90.2	90.63	98.78	97.56	100	98.86	89.47	94.94	93.9	95.79	91.07	88.46	94.74	95.83	95.08	82.05	80.95	88.52	82.35	72.22	73.08	58.62	85.11	88.37	82.05
7360	99.34	98.06	95.45	96.43	97.3	100	100	100	97.83	98.13	97.25	92.06	99.25	92.19	93.9	97.3	90.91	87.04	94.03	98.15	94.81	96.15	98	95.83	90.2	90.63	98.78	97.56	100	98.86	89.47	94.94	93.9	95.79	91.07	88.46	94.74	95.83	95.08	82.05	80.95	88.52	82.35	72.22	73.08	58.62	85.11	88.37	82.05
7380	99.34	98.06	95.45	96.43	97.3	100	100	100	98.91	98.13	97.25	93.65	99.25	92.19	93.9	97.3	90.91	87.04	94.03	98.15	94.81	96.15	98	95.83	90.2	90.63	98.78	97.56	100	98.86	89.47	94.94	93.9	95.79	91.07	88.46	96.05	95.83	95.08	82.05	80.95	88.52	82.35	72.22	73.08	58.62	85.11	88.37	82.05
7400	99.34	98.06	95.45	96.43	97.3	100	100	100	98.91	98.13	97.25	93.65	99.25	92.19	93.9	97.3	90.91	87.04	94.03	98.15	94.81	96.15	98	95.83	90.2	90.63	98.78	97.56	100	98.86	89.47	94.94	93.9	95.79	91.07	88.46	96.05	95.83	95.08	82.05	80.95	88.52	82.35	72.22	73.08	58.62	85.11	88.37	82.05
7420	99.34	98.06	95.45	96.43	97.3	100	100	100	98.91	98.13	97.25	93.65	99.25	92.19	93.9	97.3	90.91	87.04	94.03	98.15	94.81	96.15	98	95.83	90.2	90.63	98.78	98.78	100	98.86	89.47	94.94	93.9	95.79	91.07	88.46	96.05	95.83	95.08	82.05	80.95	88.52	82.35	72.22	73.08	58.62	87.23	88.37	82.05
7440	99.34	98.06	95.45	96.43	97.3	100	100	100	98.91	98.13	97.25	93.65	99.25	92.19	93.9	97.3	90.91	87.04	94.03	98.15	96.1	96.15	98	95.83	90.2	90.63	98.78	98.78	100	98.86	89.47	94.94	93.9	95.79	91.07	88.46	96.05	95.83	95.08	82.05	80.95	88.52	82.35	72.22	73.08	58.62	87.23	88.37	82.05
7460	99.34	98.06	95.45	96.43	97.3	100	100	100	98.91	98.13	97.25	93.65	99.25	92.19	93.9	97.3	90.91	87.04	94.03	98.15	96.1	96.15	98	95.83	90.2	90.63	99.39	98.78	100	98.86	89.47	94.94	93.9	95.79	91.07	88.46	96.05	95.83	95.08	82.05	80.95	88.52	82.35	72.22	73.08	58.62	87.23	88.37	82.05
7480	99.34	98.06	95.45	96.43	97.3	100	100	100	98.91	98.13	97.25	93.65	99.25	92.19	93.9	97.3	90.91	87.04	94.03	98.15	96.1	96.15	98	95.83	90.2	90.63	99.39	98.78	100	98.86	89.47	94.94	93.9	95.79	91.07	88.46	96.05	95.83	95.08	82.05	80.95	88.52	82.35	72.22	73.08	58.62	87.23	90.7	82.05
7500	99.34	98.06	95.45	96.43	97.3	100	100	100	98.91	98.13	97.25	93.65	99.25	92.19	93.9	97.3	90.91	87.04	94.03	98.15	96.1	96.15	98	95.83	90.2	90.63	99.39	98.78	100	98.86	89.47	94.94	93.9	95.79	92.86	88.46	96.05	95.83	95.08	82.05	80.95	88.52	82.35	72.22	73.08	58.62	87.23	90.7	82.05
7520	99.34	98.06	95.45	96.43	97.3	100	100	100	98.91	98.13	97.25	93.65	99.25	92.19	93.9	97.3	90.91	87.04	94.03	98.15	96.1	96.15	98	95.83	90.2	92.19	99.39	98.78	100	98.86	89.47	94.94	93.9	95.79	92.86	88.46	96.05	95.83	95.08	82.05	80.95	88.52	82.35	72.22	73.08	58.62	87.23	90.7	82.05
7540	99.34	98.06	95.45	96.43	97.3	100	100	100	98.91	98.13	97.25	93.65	99.25	92.19	93.9	97.3	90.91	87.04	94.03	98.15	96.1	96.15	98	95.83	90.2	92.19	99.39	98.78	100	98.86	89.47	94.94	93.9	95.79	92.86	88.46	96.05	95.83	95.08	82.05	80.95	88.52	82.35	72.22	73.08	58.62	87.23	90.7	82.05
7560	99.34	98.06	95.45	96.43	97.3	100	100	100	98.91	98.13	97.25	93.65	99.25	92.19	93.9	97.3	90.91	87.04	94.03	98.15	96.1	96.15	98	95.83	90.2	92.19	99.39	98.78	100	98.86	89.47	94.94	93.9	95.79	92.86	90.38	96.05	95.83	95.08	82.05	83.33	88.52	82.35	72.22	73.08	58.62	87.23	90.7	82.05
7580	99.34	98.06	95.45	96.43	97.3	100	100	100	98.91	98.13	97.25	93.65	99.25	92.19	93.9	97.3	90.91	87.04	94.03	98.15	96.1	96.15	98	95.83	90.2	92.19	99.39	98.78	100	98.86	89.47	96.2	93.9	95.79	92.86	90.38	96.05	95.83	95.08	82.05	83.33	88.52	82.35	72.22	73.08	58.62	87.23	90.7	82.05
7600	99.34	98.06	95.45	96.43	97.3	100	100	100	98.91	98.13	97.25	93.65	99.25	92.19	93.9	97.3	90.91	87.04	94.03	98.15	96.1	97.44	98	95.83	90.2	92.19	99.39	98.78	100	98.86	89.47	96.2	93.9	95.79	92.86	90.38	96.05	95.83	95.08	82.05	83.33	88.52	82.35	72.22	73.08	58.62	87.23	90.7	82.05
7620	99.34	98.06	95.45	96.43	97.3	100	100	100	98.91	98.13	97.25	93.65	99.25	92.19	93.9	98.65	90.91	87.04	94.03	98.15	96.1	97.44	98	95.83	90.2	92.19	99.39	98.78	100	98.86	89.47	96.2	93.9	95.79	92.86	90.38	96.05	95.83	95.08	82.05	83.33	88.52	82.35	72.22	73.08	58.62	87.23	90.7	82.05
7640	99.34	98.06	95.45	96.43	97.3	100	100	100	98.91	98.13	97.25	95.24	99.25	92.19	93.9	98.65	90.91	87.04	94.03	98.15	96.1	97.44	98	95.83	90.2	92.19	99.39	98.78	100	98.86	89.47	96.2	93.9	95.79	92.86	90.38	96.05	95.83	95.08	82.05	85.71	88.52	82.35	75	73.08	58.62	87.23	90.7	82.05
7660	99.34	98.06	95.45	96.43	97.3	100	100	100	98.91	98.13	97.25	95.24	99.25	92.19	93.9	98.65	90.91	87.04	94.03	98.15	96.1	97.44	98	95.83	90.2	92.19	99.39	98.78	100	98.86	89.47	96.2	93.9	95.79	92.86	90.38	96.05	95.83	96.72	82.05	85.71	88.52	82.35	75	73.08	58.62	87.23	90.7	82.05
7680	99.34	98.06	95.45	96.43	97.3	100	100	100	98.91	98.13	97.25	95.24	99.25	92.19	93.9	98.65	90.91	87.04	94.03	98.15	96.1	97.44	98	95.83	90.2	92.19	99.39	98.78	100	98.86	89.47	96.2	93.9	95.79	92.86	90.38	96.05	95.83	96.72	82.05	85.71	88.52	82.35	75	73.08	58.62	87.23	90.7	82.05
7700	99.34	98.06	95.45	96.43	97.3	100	100	100	98.91	98.13	97.25	95.24	99.25	92.19	93.9	98.65	90.91	87.04	94.03	98.15	96.1	97.44	98	95.83	90.2	92.19	99.39	98.78	100	98.86	89.47	96.2	93.9	95.79	92.86	90.38	97.37	97.22	96.72	82.05	88.1	88.52	82.35	75	73.08	58.62	87.23	90.7	82.05
7720	99.34	98.06	95.45	96.43	97.3	100	100	100	98.91	98.13	97.25	95.24	99.25	92.19	93.9	98.65	90.91	87.04	94.03	98.15	96.1	97.44	98	95.83	90.2	92.19	100	98.78	100	98.86	89.47	96.2	93.9	95.79	92.86	90.38	97.37	97.22	96.72	82.05	88.1	88.52	82.35	75	73.08	58.62	87.23	90.7	82.05
7740	99.34	98.06	95.45	96.43	97.3	100	100	100	98.91	98.13	97.25	95.24	99.25	92.19	93.9	98.65	90.91	87.04	94.03	98.15	96.1	97.44	98	95.83	90.2	92.19	100	98.78	100	98.86	89.47	96.2	93.9	95.79	92.86	90.38	97.37	97.22	96.72	82.05	88.1	88.52	82.35	75	73.08	58.62	87.23	90.7	82.05
7760	99.34	98.06	95.45	96.43	97.3	100	100	100	98.91	98.13	97.25	95.24	99.25	92.19	93.9	98.65	90.91	87.04	94.03	98.15	96.1	97.44	98	95.83	90.2	92.19	100	98.78	100	98.86	89.47	96.2	93.9	95.79	92.86	90.38	97.37	97.22	96.72	82.05	88.1	88.52	82.35	75	73.08	58.62	87.23	90.7	82.05
7780	99.34	98.06	95.45	96.43	97.3	100	100	100	98.91	98.13	97.25	95.24	99.25	92.19	93.9	98.65	90.91	87.04	94.03	98.15	96.1	97.44	98	95.83	90.2	92.19	100	98.78	100	98.86	89.47	96.2	93.9	95.79	92.86	90.38	97.37	97.22	96.72	82.05	88.1	88.52	82.35	75	73.08	58.62	87.23	90.7	82.05
7800	99.34	98.06	95.45	96.43	97.3	100	100	100	98.91	98.13	97.25	95.24	99.25	92.19	93.9	98.65	90.91	87.04	94.03	98.15	96.1	97.44	98	95.83	90.2	92.19	100	98.78	100	98.86	89.47	96.2	93.9	95.79	92.86	90.38	97.37	97.22	96.72	82.05	88.1	88.52	82.35	75	73.08	58.62	87.23	90.7	82.05
7820	99.34	98.06	95.45	96.43	97.3	100	100	100	98.91	98.13	97.25	95.24	99.25	92.19	93.9	98.65	90.91	87.04	94.03	98.15	96.1	97.44	98	95.83	90.2	92.19	100	98.78	100	98.86	89.47	96.2	93.9	95.79	92.86	90.38	97.37	97.22	96.72	82.05	88.1	88.52	82.35	75	73.08	58.62	87.23	90.7	82.05
7840	99.34	98.06	95.45	96.43	97.3	100	100	100	100	98.13	97.25	95.24	99.25	92.19	93.9	98.65	90.91	87.04	94.03	98.15	96.1	97.44	98	95.83	90.2	92.19	100	98.78	100	98.86	89.47	96.2	93.9	95.79	92.86	90.38	98.68	97.22	96.72	82.05	88.1	88.52	82.35	75	73.08	58.62	87.23	90.7	82.05
7860	99.34	98.06	95.45	96.43	97.3	100	100	100	100	98.13	97.25	95.24	99.25	92.19	93.9	98.65	90.91	87.04	94.03	98.77	96.1	97.44	98	95.83	90.2	92.19	100	98.78	100	98.86	89.47	96.2	93.9	95.79	92.86	90.38	98.68	97.22	96.72	82.05	88.1	88.52	82.35	75	73.08	62.07	87.23	90.7	82.05
7880	99.34	99.03	95.45	96.43	97.3	100	100	100	100	98.13	97.25	95.24	99.25	92.19	93.9	98.65	90.91	87.04	95.52	98.77	96.1	97.44	98	95.83	90.2	92.19	100	98.78	100	98.86	89.47	96.2	93.9	95.79	92.86	90.38	98.68	97.22	96.72	82.05	88.1	88.52	82.35	77.78	73.08	62.07	87.23	90.7	82.05
7900	99.34	99.03	95.45	96.43	97.3	100	100	100	100	98.13	97.25	96.83	99.25	92.19	93.9	98.65	90.91	87.04	95.52	98.77	96.1	97.44	98	95.83	90.2	92.19	100	98.78	100	98.86	89.47	96.2	93.9	95.79	92.86	90.38	98.68	97.22	96.72	82.05	88.1	88.52	82.35	77.78	73.08	62.07	87.23	90.7	82.05
7920	99.34	99.03	95.45	96.43	97.3	100	100	100	100	98.13	97.25	96.83	99.25	92.19	93.9	98.65	90.91	87.04	95.52	98.77	96.1	97.44	98	95.83	90.2	92.19	100	98.78	100	98.86	89.47	96.2	93.9	95.79	92.86	90.38	98.68	97.22	96.72	82.05	88.1	88.52	82.35	77.78	73.08	65.52	87.23	90.7	82.05
7940	99.34	99.03	95.45	96.43	97.3	100	100	100	100	98.13	97.25	96.83	99.25	92.19	95.12	98.65	90.91	87.04	95.52	98.77	96.1	97.44	98	95.83	90.2	92.19	100	98.78	100	98.86	89.47	96.2	93.9	95.79	94.64	90.38	98.68	97.22	96.72	82.05	88.1	88.52	82.35	77.78	73.08	65.52	87.23	90.7	82.05
7960	99.34	99.03	95.45	96.43	97.3	100	100	100	100	98.13	97.25	96.83	99.25	92.19	95.12	98.65	90.91	87.04	95.52	98.77	96.1	97.44	98	95.83	90.2	92.19	100	98.78	100	98.86	89.47	96.2	93.9	95.79	94.64	90.38	98.68	97.22	96.72	82.05	88.1	88.52	82.35	77.78	73.08	65.52	87.23	90.7	82.05
7980	99.34	99.03	95.45	96.43	97.3	100	100	100	100	98.13	97.25	96.83	99.25	92.19	95.12	98.65	90.91	87.04	95.52	98.77	96.1	97.44	99	95.83	90.2	92.19	100	98.78	100	98.86	89.47	96.2	93.9	95.79	94.64	90.38	98.68	97.22	96.72	82.05	88.1	88.52	82.35	77.78	73.08	65.52	87.23	90.7	82.05
8000	99.34	99.03	95.45	96.43	97.3	100	100	100	100	98.13	97.25	96.83	99.25	92.19	95.12	98.65	90.91	87.04	95.52	98.77	96.1	97.44	99	95.83	90.2	92.19	100	98.78	100	98.86	89.47	96.2	93.9	95.79	94.64	90.38	98.68	97.22	96.72	82.05	88.1	88.52	82.35	77.78	73.08	65.52	87.23	90.7	82.05
8020	99.34	99.03	95.45	96.43	97.3	100	100	100	100	98.13	97.25	96.83	99.25	92.19	95.12	98.65	90.91	87.04	95.52	98.77	96.1	97.44	99	95.83	90.2	92.19	100	98.78	100	98.86	89.47	96.2	93.9	95.79	94.64	90.38	98.68	97.22	96.72	82.05	90.48	88.52	82.35	77.78	73.08	65.52	87.23	90.7	82.05
8040	99.34	99.03	95.45	96.43	97.3	100	100	100	100	98.13	97.25	96.83	99.25	92.19	95.12	98.65	90.91	87.04	95.52	98.77	96.1	97.44	99	95.83	90.2	92.19	100	98.78	100	98.86	89.47	96.2	93.9	95.79	94.64	90.38	98.68	97.22	96.72	82.05	90.48	88.52	82.35	77.78	73.08	65.52	87.23	90.7	82.05
8060	99.34	99.03	95.45	96.43	97.3	100	100	100	100	98.13	97.25	96.83	99.25	92.19	95.12	98.65	90.91	88.89	95.52	98.77	96.1	97.44	99	95.83	90.2	92.19	100	98.78	100	98.86	89.47	96.2	93.9	95.79	94.64	90.38	98.68	97.22	96.72	82.05	90.48	88.52	82.35	77.78	73.08	65.52	87.23	90.7	82.05
8080	99.34	99.03	95.45	96.43	97.3	100	100	100	100	98.13	98.17	96.83	99.25	92.19	95.12	98.65	90.91	88.89	95.52	98.77	96.1	97.44	99	95.83	90.2	92.19	100	98.78	100	98.86	89.47	96.2	93.9	95.79	94.64	90.38	98.68	97.22	96.72	82.05	90.48	90.16	82.35	77.78	73.08	65.52	87.23	90.7	82.05
8100	99.34	99.03	95.45	96.43	97.3	100	100	100	100	98.13	98.17	96.83	99.25	92.19	95.12	98.65	90.91	88.89	95.52	98.77	96.1	97.44	99	95.83	90.2	92.19	100	98.78	100	98.86	89.47	96.2	93.9	95.79	94.64	90.38	98.68	97.22	96.72	82.05	90.48	90.16	82.35	77.78	73.08	65.52	87.23	90.7	82.05
8120	99.34	99.03	95.45	96.43	97.3	100	100	100	100	98.13	98.17	96.83	99.25	92.19	95.12	98.65	90.91	88.89	95.52	98.77	96.1	97.44	99	95.83	90.2	92.19	100	98.78	100	98.86	89.47	96.2	93.9	95.79	94.64	90.38	98.68	97.22	96.72	82.05	90.48	90.16	82.35	77.78	73.08	68.97	87.23	90.7	82.05
8140	99.34	100	95.45	96.43	97.3	100	100	100	100	98.13	98.17	96.83	99.25	93.75	95.12	98.65	90.91	88.89	95.52	98.77	96.1	97.44	99	95.83	90.2	92.19	100	98.78	100	98.86	89.47	96.2	93.9	95.79	94.64	90.38	98.68	97.22	96.72	82.05	90.48	90.16	82.35	77.78	73.08	68.97	87.23	90.7	82.05
8160	99.34	100	95.45	96.43	97.3	100	100	100	100	98.13	98.17	96.83	99.25	93.75	95.12	98.65	90.91	88.89	95.52	98.77	96.1	97.44	99	95.83	90.2	92.19	100	98.78	100	98.86	89.47	96.2	93.9	96.84	94.64	90.38	98.68	97.22	96.72	82.05	90.48	90.16	85.29	77.78	73.08	68.97	87.23	90.7	82.05
8180	99.34	100	95.45	96.43	97.3	100	100	100	100	98.13	98.17	96.83	99.25	93.75	95.12	98.65	90.91	88.89	95.52	98.77	96.1	98.72	99	95.83	90.2	92.19	100	98.78	100	98.86	89.47	96.2	93.9	96.84	94.64	90.38	98.68	97.22	96.72	82.05	90.48	90.16	85.29	77.78	73.08	68.97	87.23	90.7	82.05
8200	99.34	100	95.45	96.43	97.3	100	100	100	100	98.13	98.17	96.83	99.25	93.75	95.12	98.65	90.91	88.89	95.52	98.77	96.1	98.72	99	95.83	90.2	92.19	100	98.78	100	98.86	89.47	96.2	93.9	96.84	94.64	90.38	98.68	97.22	96.72	82.05	90.48	90.16	85.29	77.78	73.08	68.97	87.23	90.7	82.05
8220	99.34	100	95.45	96.43	97.3	100	100	100	100	98.13	98.17	96.83	99.25	93.75	95.12	98.65	90.91	88.89	95.52	98.77	96.1	98.72	99	95.83	90.2	92.19	100	98.78	100	98.86	89.47	96.2	93.9	96.84	94.64	90.38	98.68	97.22	96.72	82.05	90.48	90.16	85.29	77.78	73.08	68.97	87.23	90.7	82.05
8240	99.34	100	95.45	96.43	97.3	100	100	100	100	98.13	98.17	96.83	99.25	93.75	95.12	98.65	90.91	90.74	95.52	98.77	96.1	98.72	99	95.83	90.2	92.19	100	98.78	100	98.86	89.47	96.2	93.9	96.84	94.64	90.38	98.68	97.22	96.72	82.05	90.48	90.16	85.29	77.78	73.08	68.97	87.23	90.7	82.05
8260	99.34	100	95.45	96.43	97.3	100	100	100	100	98.13	98.17	96.83	99.25	93.75	95.12	98.65	90.91	90.74	95.52	98.77	96.1	98.72	99	95.83	92.16	92.19	100	98.78	100	98.86	89.47	96.2	93.9	97.89	94.64	90.38	98.68	97.22	96.72	82.05	90.48	90.16	85.29	77.78	73.08	68.97	87.23	90.7	82.05
8280	99.34	100	95.45	96.43	97.3	100	100	100	100	98.13	98.17	96.83	99.25	93.75	95.12	98.65	90.91	90.74	95.52	98.77	96.1	98.72	99	95.83	92.16	92.19	100	98.78	100	98.86	89.47	96.2	93.9	97.89	94.64	90.38	98.68	97.22	96.72	82.05	90.48	90.16	85.29	77.78	73.08	68.97	87.23	90.7	82.05
8300	99.34	100	95.45	96.43	97.3	100	100	100	100	98.13	98.17	96.83	99.25	93.75	95.12	98.65	90.91	90.74	95.52	98.77	96.1	98.72	99	95.83	92.16	92.19	100	98.78	100	98.86	89.47	96.2	93.9	97.89	94.64	90.38	100	97.22	96.72	82.05	90.48	90.16	85.29	77.78	73.08	68.97	87.23	90.7	82.05
8320	99.34	100	95.45	96.43	97.3	100	100	100	100	98.13	98.17	96.83	99.25	93.75	95.12	98.65	90.91	90.74	95.52	98.77	96.1	98.72	99	95.83	92.16	92.19	100	98.78	100	98.86	89.47	96.2	93.9	97.89	94.64	90.38	100	97.22	96.72	82.05	90.48	90.16	85.29	77.78	73.08	68.97	87.23	90.7	82.05
8340	99.34	100	95.45	96.43	97.3	100	100	100	100	98.13	98.17	96.83	99.25	93.75	95.12	98.65	90.91	90.74	95.52	98.77	96.1	98.72	99	95.83	92.16	92.19	100	98.78	100	98.86	89.47	96.2	93.9	97.89	94.64	90.38	100	97.22	96.72	82.05	90.48	90.16	88.24	77.78	73.08	68.97	87.23	90.7	82.05
8360	99.34	100	95.45	96.43	97.3	100	100	100	100	98.13	98.17	96.83	99.25	93.75	95.12	98.65	90.91	92.59	95.52	98.77	96.1	98.72	99	95.83	92.16	92.19	100	98.78	100	98.86	89.47	96.2	93.9	97.89	94.64	90.38	100	97.22	96.72	82.05	90.48	90.16	88.24	77.78	73.08	68.97	87.23	90.7	82.05
8380	99.34	100	95.45	96.43	97.3	100	100	100	100	98.13	98.17	96.83	99.25	93.75	95.12	98.65	90.91	92.59	95.52	98.77	96.1	98.72	99	95.83	92.16	92.19	100	98.78	100	98.86	89.47	96.2	93.9	97.89	94.64	90.38	100	97.22	96.72	82.05	90.48	90.16	88.24	77.78	73.08	68.97	87.23	90.7	82.05
8400	99.34	100	95.45	96.43	97.3	100	100	100	100	98.13	98.17	96.83	99.25	93.75	95.12	98.65	90.91	92.59	95.52	98.77	96.1	98.72	99	95.83	92.16	92.19	100	98.78	100	98.86	89.47	96.2	93.9	97.89	94.64	90.38	100	97.22	96.72	82.05	90.48	90.16	88.24	77.78	73.08	68.97	87.23	90.7	82.05
8420	99.34	100	95.45	96.43	97.3	100	100	100	100	98.13	98.17	96.83	99.25	93.75	95.12	98.65	90.91	92.59	95.52	98.77	96.1	98.72	99	95.83	92.16	92.19	100	98.78	100	98.86	89.47	96.2	93.9	97.89	94.64	90.38	100	97.22	96.72	82.05	90.48	90.16	88.24	77.78	73.08	68.97	87.23	90.7	82.05
8440	99.34	100	95.45	96.43	97.3	100	100	100	100	98.13	98.17	96.83	100	93.75	95.12	98.65	90.91	92.59	95.52	98.77	96.1	98.72	99	95.83	92.16	92.19	100	98.78	100	98.86	89.47	96.2	93.9	97.89	94.64	90.38	100	97.22	96.72	82.05	90.48	90.16	88.24	77.78	73.08	68.97	87.23	90.7	82.05
8460	99.34	100	95.45	96.43	97.3	100	100	100	100	98.13	98.17	96.83	100	93.75	96.34	98.65	90.91	92.59	95.52	98.77	96.1	98.72	99	95.83	92.16	92.19	100	98.78	100	98.86	89.47	96.2	95.12	97.89	94.64	90.38	100	97.22	96.72	82.05	90.48	91.8	88.24	77.78	73.08	68.97	87.23	90.7	82.05
8480	99.34	100	95.45	96.43	97.3	100	100	100	100	98.13	98.17	96.83	100	93.75	96.34	98.65	90.91	92.59	95.52	98.77	96.1	98.72	99	95.83	92.16	92.19	100	98.78	100	98.86	89.47	96.2	95.12	97.89	94.64	90.38	100	97.22	96.72	82.05	90.48	91.8	88.24	77.78	73.08	68.97	87.23	90.7	82.05
8500	99.34	100	95.45	96.43	97.3	100	100	100	100	98.13	98.17	96.83	100	93.75	96.34	98.65	90.91	92.59	95.52	98.77	96.1	98.72	99	95.83	92.16	92.19	100	98.78	100	98.86	89.47	96.2	95.12	97.89	94.64	92.31	100	97.22	96.72	82.05	90.48	91.8	88.24	77.78	76.92	68.97	89.36	90.7	84.62
8520	99.34	100	95.45	97.62	97.3	100	100	100	100	98.13	98.17	96.83	100	93.75	96.34	98.65	90.91	92.59	95.52	98.77	96.1	98.72	99	95.83	92.16	92.19	100	98.78	100	98.86	89.47	96.2	95.12	97.89	94.64	92.31	100	97.22	96.72	82.05	90.48	91.8	88.24	77.78	76.92	68.97	89.36	90.7	84.62
8540	99.34	100	95.45	97.62	97.3	100	100	100	100	98.13	98.17	96.83	100	93.75	96.34	98.65	90.91	92.59	95.52	98.77	96.1	98.72	99	95.83	92.16	92.19	100	98.78	100	98.86	89.47	96.2	95.12	97.89	94.64	92.31	100	97.22	96.72	82.05	90.48	91.8	88.24	77.78	76.92	68.97	89.36	90.7	84.62
8560	99.34	100	95.45	97.62	97.3	100	100	100	100	98.13	98.17	96.83	100	93.75	96.34	98.65	90.91	92.59	95.52	98.77	96.1	98.72	99	95.83	92.16	92.19	100	98.78	100	98.86	89.47	96.2	95.12	97.89	94.64	92.31	100	97.22	96.72	82.05	90.48	91.8	88.24	77.78	76.92	68.97	89.36	90.7	84.62
8580	99.34	100	95.45	97.62	97.3	100	100	100	100	98.13	98.17	96.83	100	93.75	96.34	98.65	90.91	92.59	95.52	98.77	96.1	98.72	99	95.83	92.16	93.75	100	98.78	100	98.86	89.47	96.2	95.12	97.89	94.64	92.31	100	97.22	96.72	82.05	90.48	91.8	88.24	77.78	76.92	68.97	89.36	90.7	84.62
8600	99.34	100	95.45	97.62	97.3	100	100	100	100	98.13	98.17	96.83	100	93.75	96.34	98.65	90.91	92.59	95.52	98.77	96.1	98.72	99	95.83	92.16	93.75	100	98.78	100	98.86	89.47	96.2	95.12	97.89	94.64	92.31	100	97.22	96.72	82.05	90.48	91.8	88.24	80.56	76.92	68.97	89.36	90.7	84.62
8620	99.34	100	95.45	97.62	97.3	100	100	100	100	98.13	98.17	96.83	100	93.75	96.34	98.65	90.91	92.59	95.52	98.77	96.1	98.72	99	95.83	92.16	93.75	100	98.78	100	98.86	89.47	96.2	95.12	97.89	94.64	92.31	100	97.22	96.72	82.05	90.48	91.8	88.24	80.56	76.92	68.97	89.36	90.7	84.62
8640	99.34	100	95.45	97.62	97.3	100	100	100	100	98.13	98.17	96.83	100	93.75	96.34	98.65	90.91	92.59	95.52	98.77	96.1	98.72	99	95.83	92.16	93.75	100	98.78	100	98.86	89.47	96.2	95.12	97.89	94.64	92.31	100	97.22	96.72	82.05	90.48	91.8	88.24	80.56	76.92	68.97	89.36	90.7	87.18
8660	99.34	100	95.45	97.62	97.3	100	100	100	100	98.13	98.17	96.83	100	93.75	96.34	98.65	90.91	92.59	95.52	98.77	96.1	98.72	99	95.83	92.16	93.75	100	98.78	100	98.86	89.47	96.2	95.12	97.89	94.64	92.31	100	97.22	96.72	82.05	90.48	91.8	91.18	80.56	76.92	68.97	89.36	90.7	87.18
8680	99.34	100	95.45	97.62	97.3	100	100	100	100	98.13	98.17	96.83	100	93.75	96.34	98.65	90.91	92.59	95.52	98.77	96.1	98.72	99	95.83	92.16	93.75	100	98.78	100	98.86	89.47	96.2	95.12	97.89	94.64	92.31	100	97.22	96.72	82.05	90.48	91.8	91.18	80.56	76.92	68.97	89.36	90.7	87.18
8700	99.34	100	95.45	97.62	97.3	100	100	100	100	98.13	98.17	96.83	100	93.75	96.34	98.65	90.91	92.59	95.52	98.77	96.1	98.72	99	95.83	92.16	93.75	100	98.78	100	98.86	89.47	96.2	95.12	97.89	94.64	92.31	100	97.22	96.72	82.05	90.48	91.8	91.18	80.56	76.92	68.97	89.36	90.7	87.18
8720	99.34	100	95.45	97.62	97.3	100	100	100	100	98.13	98.17	96.83	100	93.75	96.34	98.65	90.91	92.59	95.52	98.77	96.1	98.72	99	95.83	92.16	93.75	100	98.78	100	98.86	89.47	96.2	95.12	97.89	94.64	92.31	100	97.22	96.72	82.05	90.48	91.8	91.18	80.56	76.92	68.97	89.36	90.7	87.18
8740	99.34	100	96.59	97.62	97.3	100	100	100	100	98.13	98.17	96.83	100	93.75	96.34	98.65	90.91	92.59	95.52	98.77	96.1	98.72	99	95.83	92.16	93.75	100	98.78	100	98.86	89.47	96.2	95.12	97.89	94.64	92.31	100	97.22	96.72	82.05	90.48	91.8	91.18	80.56	76.92	68.97	89.36	90.7	87.18
8760	99.34	100	96.59	97.62	97.3	100	100	100	100	98.13	98.17	96.83	100	93.75	96.34	98.65	90.91	92.59	95.52	98.77	96.1	98.72	99	95.83	92.16	93.75	100	98.78	100	98.86	89.47	96.2	95.12	97.89	94.64	92.31	100	97.22	96.72	82.05	90.48	91.8	91.18	80.56	76.92	68.97	89.36	90.7	87.18
8780	99.34	100	96.59	97.62	97.3	100	100	100	100	98.13	98.17	96.83	100	93.75	96.34	98.65	90.91	92.59	95.52	98.77	96.1	98.72	99	95.83	92.16	93.75	100	100	100	98.86	89.47	96.2	95.12	97.89	94.64	92.31	100	97.22	96.72	84.62	90.48	91.8	91.18	83.33	76.92	68.97	91.49	90.7	87.18
8800	100	100	96.59	97.62	97.3	100	100	100	100	98.13	98.17	96.83	100	93.75	96.34	98.65	90.91	92.59	95.52	98.77	97.4	98.72	99	95.83	92.16	93.75	100	100	100	98.86	89.47	96.2	95.12	97.89	96.43	92.31	100	97.22	96.72	84.62	90.48	91.8	91.18	83.33	76.92	68.97	91.49	90.7	87.18
8820	100	100	96.59	98.81	97.3	100	100	100	100	98.13	98.17	96.83	100	93.75	96.34	98.65	90.91	92.59	95.52	98.77	97.4	98.72	99	95.83	92.16	93.75	100	100	100	98.86	89.47	96.2	95.12	97.89	96.43	92.31	100	97.22	96.72	84.62	90.48	91.8	91.18	83.33	76.92	68.97	91.49	90.7	87.18
8840	100	100	97.73	98.81	97.3	100	100	100	100	98.13	99.08	96.83	100	93.75	96.34	98.65	90.91	92.59	95.52	98.77	97.4	98.72	99	95.83	92.16	93.75	100	100	100	98.86	89.47	96.2	95.12	97.89	96.43	92.31	100	97.22	96.72	84.62	90.48	91.8	94.12	83.33	80.77	68.97	91.49	90.7	87.18
8860	100	100	97.73	98.81	97.3	100	100	100	100	98.13	99.08	96.83	100	93.75	96.34	98.65	90.91	92.59	95.52	98.77	97.4	98.72	99	95.83	92.16	93.75	100	100	100	98.86	89.47	96.2	95.12	97.89	96.43	92.31	100	97.22	96.72	84.62	90.48	91.8	94.12	83.33	80.77	68.97	91.49	90.7	87.18
8880	100	100	97.73	98.81	97.3	100	100	100	100	98.13	99.08	96.83	100	93.75	96.34	98.65	90.91	92.59	95.52	98.77	97.4	98.72	99	95.83	92.16	93.75	100	100	100	98.86	89.47	96.2	95.12	97.89	96.43	92.31	100	97.22	96.72	84.62	90.48	91.8	94.12	83.33	80.77	68.97	91.49	90.7	87.18
8900	100	100	97.73	98.81	97.3	100	100	100	100	98.13	100	96.83	100	93.75	96.34	98.65	90.91	92.59	95.52	98.77	97.4	98.72	99	95.83	92.16	93.75	100	100	100	98.86	89.47	96.2	95.12	97.89	96.43	92.31	100	97.22	96.72	84.62	90.48	91.8	94.12	83.33	80.77	68.97	91.49	90.7	87.18
8920	100	100	97.73	98.81	97.3	100	100	100	100	98.13	100	96.83	100	93.75	96.34	98.65	90.91	92.59	95.52	98.77	97.4	98.72	99	95.83	92.16	93.75	100	100	100	98.86	89.47	97.47	95.12	97.89	96.43	92.31	100	97.22	96.72	84.62	90.48	91.8	94.12	83.33	80.77	72.41	91.49	90.7	87.18
8940	100	100	97.73	98.81	97.3	100	100	100	100	98.13	100	96.83	100	93.75	96.34	98.65	90.91	92.59	95.52	98.77	97.4	98.72	99	95.83	92.16	93.75	100	100	100	98.86	89.47	97.47	95.12	97.89	96.43	92.31	100	97.22	96.72	84.62	90.48	91.8	94.12	83.33	80.77	72.41	91.49	90.7	87.18
8960	100	100	97.73	98.81	98.65	100	100	100	100	98.13	100	96.83	100	93.75	96.34	98.65	90.91	92.59	95.52	98.77	97.4	98.72	99	95.83	92.16	93.75	100	100	100	98.86	89.47	97.47	95.12	97.89	96.43	92.31	100	98.61	96.72	84.62	90.48	91.8	94.12	83.33	80.77	72.41	91.49	90.7	87.18
8980	100	100	97.73	98.81	98.65	100	100	100	100	98.13	100	96.83	100	93.75	96.34	98.65	90.91	92.59	95.52	98.77	97.4	98.72	99	95.83	92.16	93.75	100	100	100	98.86	89.47	97.47	95.12	97.89	96.43	92.31	100	98.61	96.72	84.62	90.48	91.8	94.12	83.33	80.77	72.41	91.49	90.7	87.18
9000	100	100	97.73	98.81	98.65	100	100	100	100	98.13	100	96.83	100	93.75	96.34	98.65	90.91	92.59	95.52	98.77	97.4	98.72	99	95.83	92.16	93.75	100	100	100	98.86	91.23	97.47	95.12	97.89	96.43	92.31	100	98.61	96.72	84.62	90.48	91.8	94.12	86.11	80.77	72.41	91.49	90.7	87.18
9020	100	100	97.73	98.81	98.65	100	100	100	100	98.13	100	96.83	100	93.75	97.56	98.65	90.91	92.59	95.52	98.77	97.4	98.72	99	95.83	92.16	93.75	100	100	100	98.86	91.23	97.47	95.12	97.89	96.43	92.31	100	98.61	96.72	84.62	90.48	91.8	94.12	86.11	80.77	72.41	91.49	90.7	87.18
9040	100	100	97.73	98.81	98.65	100	100	100	100	98.13	100	96.83	100	93.75	97.56	98.65	90.91	92.59	95.52	98.77	97.4	98.72	99	95.83	94.12	93.75	100	100	100	98.86	91.23	97.47	95.12	97.89	96.43	92.31	100	98.61	96.72	84.62	90.48	91.8	94.12	86.11	80.77	72.41	91.49	90.7	87.18
9060	100	100	97.73	98.81	98.65	100	100	100	100	98.13	100	96.83	100	93.75	97.56	98.65	90.91	92.59	95.52	98.77	97.4	98.72	99	95.83	94.12	93.75	100	100	100	98.86	91.23	97.47	95.12	97.89	96.43	92.31	100	98.61	96.72	84.62	90.48	91.8	94.12	86.11	80.77	72.41	91.49	90.7	87.18
9080	100	100	97.73	98.81	98.65	100	100	100	100	98.13	100	96.83	100	93.75	97.56	98.65	90.91	92.59	95.52	98.77	97.4	98.72	99	95.83	94.12	93.75	100	100	100	98.86	92.98	97.47	95.12	97.89	96.43	92.31	100	98.61	96.72	84.62	90.48	91.8	94.12	86.11	80.77	72.41	91.49	90.7	87.18
9100	100	100	97.73	98.81	98.65	100	100	100	100	98.13	100	96.83	100	93.75	97.56	98.65	90.91	94.44	95.52	98.77	97.4	98.72	99	95.83	94.12	93.75	100	100	100	98.86	92.98	97.47	95.12	97.89	96.43	92.31	100	98.61	96.72	84.62	90.48	91.8	94.12	86.11	80.77	72.41	91.49	90.7	87.18
9120	100	100	97.73	98.81	98.65	100	100	100	100	98.13	100	96.83	100	93.75	97.56	98.65	90.91	94.44	95.52	98.77	97.4	98.72	99	95.83	94.12	93.75	100	100	100	98.86	92.98	97.47	95.12	97.89	96.43	92.31	100	98.61	96.72	84.62	90.48	91.8	94.12	86.11	80.77	72.41	91.49	90.7	87.18
9140	100	100	97.73	98.81	98.65	100	100	100	100	98.13	100	96.83	100	93.75	98.78	98.65	90.91	94.44	95.52	98.77	97.4	98.72	99	95.83	94.12	93.75	100	100	100	98.86	92.98	97.47	95.12	97.89	96.43	92.31	100	98.61	96.72	84.62	90.48	91.8	94.12	86.11	80.77	72.41	91.49	90.7	87.18
9160	100	100	97.73	98.81	98.65	100	100	100	100	98.13	100	98.41	100	93.75	98.78	98.65	90.91	94.44	95.52	98.77	97.4	98.72	99	95.83	94.12	93.75	100	100	100	98.86	92.98	97.47	95.12	97.89	96.43	92.31	100	98.61	96.72	84.62	90.48	91.8	94.12	86.11	80.77	72.41	91.49	90.7	87.18
9180	100	100	97.73	98.81	98.65	100	100	100	100	98.13	100	98.41	100	93.75	98.78	98.65	90.91	94.44	95.52	98.77	97.4	98.72	99	95.83	94.12	93.75	100	100	100	98.86	92.98	97.47	95.12	97.89	96.43	92.31	100	98.61	96.72	84.62	90.48	91.8	94.12	86.11	80.77	72.41	91.49	90.7	87.18
9200	100	100	97.73	98.81	98.65	100	100	100	100	98.13	100	98.41	100	93.75	98.78	98.65	90.91	94.44	95.52	98.77	97.4	98.72	99	95.83	94.12	93.75	100	100	100	98.86	92.98	97.47	95.12	97.89	96.43	92.31	100	98.61	96.72	87.18	90.48	91.8	94.12	86.11	80.77	72.41	91.49	90.7	87.18
9220	100	100	97.73	98.81	98.65	100	100	100	100	98.13	100	98.41	100	93.75	98.78	98.65	90.91	94.44	95.52	99.38	97.4	98.72	99	95.83	94.12	93.75	100	100	100	98.86	92.98	97.47	95.12	97.89	96.43	92.31	100	98.61	96.72	87.18	90.48	91.8	94.12	86.11	80.77	72.41	91.49	90.7	87.18
9240	100	100	97.73	98.81	98.65	100	100	100	100	98.13	100	98.41	100	93.75	98.78	98.65	90.91	94.44	95.52	99.38	97.4	98.72	99	95.83	94.12	93.75	100	100	100	98.86	92.98	97.47	95.12	97.89	96.43	92.31	100	98.61	96.72	87.18	90.48	91.8	94.12	86.11	80.77	72.41	91.49	90.7	87.18
9260	100	100	97.73	98.81	98.65	100	100	100	100	98.13	100	98.41	100	93.75	98.78	98.65	90.91	96.3	95.52	99.38	97.4	98.72	99	95.83	94.12	93.75	100	100	100	98.86	92.98	97.47	95.12	97.89	96.43	92.31	100	98.61	96.72	87.18	90.48	91.8	94.12	86.11	80.77	72.41	91.49	90.7	87.18
9280	100	100	97.73	98.81	98.65	100	100	100	100	98.13	100	98.41	100	93.75	98.78	98.65	90.91	96.3	95.52	99.38	97.4	98.72	99	95.83	94.12	93.75	100	100	100	98.86	92.98	97.47	95.12	98.95	96.43	92.31	100	98.61	96.72	87.18	90.48	91.8	94.12	86.11	80.77	72.41	91.49	90.7	87.18
9300	100	100	97.73	98.81	98.65	100	100	100	100	98.13	100	98.41	100	93.75	98.78	98.65	90.91	96.3	95.52	99.38	97.4	98.72	99	95.83	94.12	93.75	100	100	100	98.86	92.98	97.47	95.12	98.95	96.43	94.23	100	98.61	96.72	87.18	90.48	91.8	94.12	86.11	80.77	72.41	91.49	90.7	87.18
9320	100	100	97.73	98.81	98.65	100	100	100	100	98.13	100	98.41	100	93.75	98.78	98.65	90.91	96.3	95.52	99.38	97.4	98.72	99	95.83	94.12	93.75	100	100	100	98.86	92.98	97.47	95.12	98.95	96.43	94.23	100	98.61	96.72	87.18	90.48	91.8	94.12	86.11	80.77	72.41	91.49	90.7	87.18
9340	100	100	97.73	98.81	98.65	100	100	100	100	98.13	100	98.41	100	93.75	98.78	98.65	90.91	96.3	95.52	99.38	97.4	98.72	99	95.83	94.12	93.75	100	100	100	98.86	92.98	97.47	95.12	98.95	96.43	94.23	100	98.61	96.72	87.18	90.48	91.8	94.12	86.11	80.77	75.86	91.49	90.7	87.18
9360	100	100	97.73	98.81	98.65	100	100	100	100	98.13	100	98.41	100	93.75	98.78	98.65	90.91	96.3	95.52	99.38	97.4	98.72	99	95.83	94.12	93.75	100	100	100	98.86	92.98	97.47	95.12	98.95	96.43	94.23	100	98.61	96.72	87.18	90.48	91.8	94.12	86.11	80.77	75.86	91.49	90.7	87.18
9380	100	100	97.73	98.81	98.65	100	100	100	100	98.13	100	98.41	100	93.75	98.78	98.65	90.91	96.3	95.52	99.38	97.4	98.72	99	95.83	94.12	93.75	100	100	100	98.86	92.98	97.47	95.12	98.95	96.43	94.23	100	98.61	96.72	87.18	90.48	91.8	94.12	86.11	80.77	75.86	91.49	90.7	87.18
9400	100	100	97.73	98.81	98.65	100	100	100	100	98.13	100	98.41	100	93.75	98.78	98.65	90.91	96.3	95.52	99.38	97.4	98.72	99	95.83	94.12	93.75	100	100	100	98.86	94.74	97.47	95.12	98.95	96.43	94.23	100	98.61	96.72	87.18	90.48	91.8	94.12	86.11	80.77	75.86	91.49	90.7	87.18
9420	100	100	97.73	98.81	98.65	100	100	100	100	98.13	100	98.41	100	93.75	98.78	98.65	90.91	96.3	95.52	99.38	97.4	98.72	99	95.83	94.12	93.75	100	100	100	98.86	94.74	97.47	95.12	98.95	96.43	94.23	100	98.61	96.72	87.18	90.48	91.8	94.12	86.11	80.77	75.86	91.49	90.7	87.18
9440	100	100	98.86	98.81	98.65	100	100	100	100	98.13	100	98.41	100	93.75	98.78	98.65	90.91	96.3	95.52	99.38	97.4	98.72	99	95.83	94.12	93.75	100	100	100	98.86	94.74	97.47	95.12	98.95	96.43	94.23	100	98.61	96.72	87.18	90.48	91.8	94.12	86.11	80.77	75.86	91.49	90.7	87.18
9460	100	100	98.86	98.81	98.65	100	100	100	100	98.13	100	98.41	100	93.75	98.78	98.65	90.91	96.3	95.52	99.38	97.4	98.72	99	95.83	94.12	93.75	100	100	100	98.86	94.74	97.47	95.12	98.95	98.21	94.23	100	98.61	96.72	87.18	90.48	91.8	94.12	86.11	80.77	75.86	91.49	90.7	87.18
9480	100	100	98.86	98.81	98.65	100	100	100	100	98.13	100	98.41	100	93.75	98.78	98.65	90.91	96.3	95.52	99.38	97.4	98.72	99	95.83	94.12	93.75	100	100	100	98.86	94.74	97.47	95.12	98.95	98.21	94.23	100	98.61	96.72	87.18	90.48	91.8	94.12	86.11	80.77	75.86	91.49	90.7	87.18
9500	100	100	98.86	98.81	98.65	100	100	100	100	98.13	100	98.41	100	93.75	98.78	98.65	90.91	96.3	95.52	99.38	97.4	98.72	99	95.83	94.12	93.75	100	100	100	98.86	94.74	97.47	95.12	98.95	98.21	94.23	100	98.61	96.72	87.18	90.48	91.8	94.12	86.11	80.77	75.86	91.49	90.7	87.18
9520	100	100	98.86	98.81	98.65	100	100	100	100	98.13	100	98.41	100	93.75	98.78	98.65	90.91	96.3	95.52	99.38	97.4	98.72	99	95.83	94.12	95.31	100	100	100	98.86	94.74	97.47	95.12	98.95	98.21	94.23	100	98.61	96.72	87.18	90.48	91.8	94.12	86.11	80.77	75.86	91.49	90.7	87.18
9540	100	100	98.86	98.81	98.65	100	100	100	100	98.13	100	98.41	100	95.31	98.78	98.65	90.91	96.3	95.52	99.38	97.4	98.72	99	95.83	94.12	95.31	100	100	100	98.86	94.74	97.47	95.12	98.95	98.21	94.23	100	98.61	96.72	87.18	90.48	91.8	94.12	88.89	80.77	75.86	91.49	90.7	87.18
9560	100	100	98.86	98.81	98.65	100	100	100	100	98.13	100	98.41	100	95.31	98.78	98.65	90.91	96.3	95.52	99.38	97.4	98.72	99	95.83	94.12	95.31	100	100	100	98.86	94.74	97.47	95.12	98.95	98.21	94.23	100	98.61	96.72	87.18	90.48	91.8	94.12	88.89	80.77	75.86	91.49	90.7	87.18
9580	100	100	98.86	98.81	98.65	100	100	100	100	98.13	100	98.41	100	95.31	98.78	98.65	90.91	96.3	95.52	99.38	97.4	98.72	99	95.83	94.12	95.31	100	100	100	98.86	94.74	97.47	95.12	98.95	98.21	94.23	100	100	96.72	87.18	90.48	91.8	94.12	88.89	80.77	75.86	91.49	90.7	87.18
9600	100	100	98.86	98.81	98.65	100	100	100	100	98.13	100	98.41	100	95.31	98.78	98.65	90.91	96.3	95.52	99.38	97.4	98.72	99	95.83	94.12	95.31	100	100	100	98.86	94.74	97.47	95.12	98.95	98.21	94.23	100	100	96.72	87.18	90.48	91.8	94.12	88.89	80.77	75.86	91.49	90.7	87.18
9620	100	100	98.86	98.81	98.65	100	100	100	100	98.13	100	98.41	100	95.31	98.78	98.65	90.91	96.3	95.52	99.38	97.4	98.72	99	95.83	94.12	95.31	100	100	100	98.86	94.74	97.47	95.12	98.95	98.21	94.23	100	100	96.72	87.18	90.48	91.8	94.12	88.89	80.77	75.86	91.49	90.7	87.18
9640	100	100	98.86	98.81	98.65	100	100	100	100	98.13	100	98.41	100	95.31	98.78	98.65	90.91	96.3	95.52	99.38	97.4	98.72	99	95.83	94.12	95.31	100	100	100	98.86	94.74	97.47	95.12	98.95	98.21	94.23	100	100	96.72	87.18	90.48	91.8	94.12	88.89	80.77	75.86	91.49	90.7	87.18
9660	100	100	98.86	98.81	98.65	100	100	100	100	98.13	100	98.41	100	95.31	98.78	98.65	90.91	96.3	95.52	99.38	97.4	98.72	99	95.83	94.12	95.31	100	100	100	98.86	94.74	97.47	95.12	98.95	98.21	94.23	100	100	96.72	87.18	90.48	91.8	94.12	88.89	80.77	75.86	91.49	90.7	87.18
9680	100	100	98.86	98.81	98.65	100	100	100	100	98.13	100	98.41	100	95.31	98.78	98.65	90.91	96.3	95.52	99.38	97.4	98.72	99	97.22	94.12	95.31	100	100	100	98.86	94.74	97.47	95.12	98.95	98.21	94.23	100	100	96.72	87.18	90.48	91.8	94.12	88.89	80.77	75.86	91.49	90.7	87.18
9700	100	100	98.86	98.81	98.65	100	100	100	100	98.13	100	98.41	100	95.31	98.78	98.65	90.91	96.3	95.52	99.38	97.4	98.72	99	97.22	94.12	95.31	100	100	100	98.86	94.74	97.47	95.12	98.95	98.21	94.23	100	100	96.72	87.18	90.48	91.8	94.12	88.89	80.77	75.86	91.49	90.7	87.18
9720	100	100	98.86	98.81	98.65	100	100	100	100	98.13	100	98.41	100	95.31	98.78	98.65	90.91	96.3	95.52	99.38	97.4	98.72	99	97.22	94.12	95.31	100	100	100	98.86	94.74	97.47	95.12	98.95	98.21	94.23	100	100	96.72	87.18	90.48	91.8	94.12	88.89	80.77	75.86	91.49	90.7	87.18
9740	100	100	98.86	98.81	98.65	100	100	100	100	98.13	100	98.41	100	95.31	98.78	98.65	90.91	96.3	95.52	99.38	97.4	98.72	99	97.22	94.12	95.31	100	100	100	98.86	94.74	97.47	95.12	98.95	98.21	94.23	100	100	96.72	87.18	90.48	91.8	94.12	88.89	80.77	75.86	91.49	90.7	87.18
9760	100	100	98.86	98.81	98.65	100	100	100	100	98.13	100	98.41	100	95.31	98.78	98.65	90.91	96.3	95.52	99.38	97.4	98.72	99	97.22	94.12	95.31	100	100	100	98.86	94.74	97.47	95.12	98.95	98.21	94.23	100	100	96.72	87.18	90.48	91.8	94.12	88.89	80.77	75.86	91.49	90.7	87.18
9780	100	100	98.86	98.81	98.65	100	100	100	100	98.13	100	98.41	100	95.31	98.78	98.65	90.91	96.3	95.52	99.38	97.4	98.72	99	97.22	94.12	95.31	100	100	100	98.86	94.74	97.47	95.12	98.95	98.21	94.23	100	100	96.72	87.18	90.48	91.8	94.12	88.89	80.77	75.86	91.49	90.7	87.18
9800	100	100	98.86	98.81	98.65	100	100	100	100	98.13	100	98.41	100	95.31	98.78	98.65	90.91	96.3	95.52	99.38	97.4	98.72	99	97.22	94.12	95.31	100	100	100	98.86	94.74	97.47	95.12	98.95	98.21	94.23	100	100	96.72	87.18	90.48	91.8	94.12	88.89	80.77	75.86	91.49	90.7	87.18
9820	100	100	98.86	98.81	98.65	100	100	100	100	98.13	100	98.41	100	95.31	98.78	98.65	90.91	96.3	95.52	99.38	97.4	98.72	99	97.22	94.12	95.31	100	100	100	98.86	94.74	97.47	95.12	98.95	98.21	94.23	100	100	96.72	87.18	90.48	91.8	94.12	88.89	80.77	75.86	91.49	90.7	87.18
9840	100	100	98.86	98.81	98.65	100	100	100	100	98.13	100	98.41	100	95.31	98.78	98.65	90.91	96.3	95.52	99.38	97.4	98.72	99	98.61	94.12	95.31	100	100	100	98.86	94.74	97.47	95.12	98.95	98.21	94.23	100	100	96.72	87.18	90.48	91.8	94.12	88.89	80.77	75.86	91.49	90.7	87.18
9860	100	100	98.86	98.81	98.65	100	100	100	100	98.13	100	98.41	100	95.31	98.78	98.65	90.91	96.3	95.52	99.38	97.4	98.72	99	98.61	94.12	95.31	100	100	100	98.86	94.74	97.47	95.12	98.95	98.21	94.23	100	100	96.72	87.18	90.48	91.8	94.12	88.89	80.77	75.86	91.49	90.7	87.18
9880	100	100	98.86	98.81	98.65	100	100	100	100	98.13	100	98.41	100	95.31	98.78	98.65	90.91	96.3	95.52	99.38	97.4	98.72	99	98.61	94.12	95.31	100	100	100	98.86	94.74	97.47	95.12	98.95	98.21	94.23	100	100	96.72	87.18	90.48	91.8	94.12	88.89	80.77	75.86	91.49	90.7	87.18
9900	100	100	98.86	98.81	98.65	100	100	100	100	98.13	100	98.41	100	95.31	98.78	98.65	90.91	96.3	95.52	99.38	97.4	98.72	99	98.61	94.12	95.31	100	100	100	98.86	94.74	97.47	95.12	98.95	98.21	94.23	100	100	96.72	87.18	90.48	91.8	94.12	88.89	80.77	75.86	91.49	90.7	87.18
9920	100	100	100	98.81	98.65	100	100	100	100	98.13	100	98.41	100	95.31	98.78	98.65	90.91	96.3	95.52	99.38	97.4	98.72	99	98.61	94.12	95.31	100	100	100	98.86	94.74	97.47	95.12	98.95	98.21	94.23	100	100	96.72	87.18	90.48	91.8	94.12	88.89	80.77	75.86	91.49	90.7	87.18
9940	100	100	100	98.81	98.65	100	100	100	100	98.13	100	98.41	100	95.31	98.78	98.65	90.91	96.3	95.52	99.38	97.4	98.72	99	98.61	94.12	95.31	100	100	100	98.86	94.74	98.73	95.12	98.95	98.21	94.23	100	100	96.72	87.18	90.48	91.8	94.12	88.89	80.77	75.86	91.49	90.7	87.18
9960	100	100	100	98.81	98.65	100	100	100	100	98.13	100	98.41	100	95.31	98.78	98.65	90.91	96.3	95.52	99.38	97.4	98.72	99	98.61	94.12	95.31	100	100	100	98.86	94.74	98.73	95.12	98.95	98.21	94.23	100	100	96.72	87.18	90.48	91.8	94.12	88.89	80.77	75.86	91.49	90.7	87.18
9980	100	100	100	98.81	98.65	100	100	100	100	98.13	100	98.41	100	95.31	98.78	98.65	90.91	96.3	95.52	99.38	97.4	98.72	99	98.61	94.12	95.31	100	100	100	98.86	94.74	98.73	95.12	98.95	98.21	94.23	100	100	96.72	87.18	90.48	91.8	94.12	91.67	80.77	75.86	91.49	90.7	87.18
10000	100	100	100	98.81	98.65	100	100	100	100	98.13	100	98.41	100	95.31	98.78	98.65	90.91	96.3	95.52	99.38	97.4	98.72	99	98.61	94.12	95.31	100	100	100	98.86	94.74	98.73	95.12	98.95	98.21	94.23	100	100	96.72	87.18	90.48	91.8	94.12	91.67	80.77	79.31	91.49	90.7	87.18
10020	100	100	100	98.81	98.65	100	100	100	100	98.13	100	98.41	100	95.31	98.78	98.65	90.91	96.3	95.52	99.38	97.4	98.72	99	98.61	94.12	95.31	100	100	100	98.86	94.74	100	95.12	98.95	98.21	94.23	100	100	96.72	87.18	90.48	91.8	94.12	91.67	80.77	79.31	91.49	90.7	87.18
10040	100	100	100	98.81	98.65	100	100	100	100	98.13	100	98.41	100	95.31	98.78	98.65	90.91	96.3	95.52	99.38	97.4	98.72	99	98.61	94.12	95.31	100	100	100	98.86	94.74	100	95.12	98.95	98.21	94.23	100	100	96.72	87.18	90.48	91.8	94.12	91.67	80.77	79.31	91.49	90.7	87.18
10060	100	100	100	98.81	98.65	100	100	100	100	99.07	100	98.41	100	95.31	98.78	98.65	90.91	96.3	95.52	99.38	97.4	98.72	99	98.61	94.12	95.31	100	100	100	98.86	94.74	100	95.12	98.95	98.21	94.23	100	100	96.72	87.18	90.48	91.8	94.12	91.67	80.77	79.31	91.49	90.7	87.18
10080	100	100	100	98.81	98.65	100	100	100	100	99.07	100	98.41	100	95.31	98.78	98.65	90.91	96.3	95.52	99.38	97.4	98.72	99	98.61	94.12	95.31	100	100	100	98.86	94.74	100	95.12	98.95	98.21	94.23	100	100	96.72	87.18	90.48	93.44	94.12	91.67	80.77	79.31	91.49	90.7	87.18
10100	100	100	100	98.81	98.65	100	100	100	100	99.07	100	98.41	100	95.31	98.78	98.65	92.73	96.3	95.52	99.38	97.4	98.72	99	98.61	94.12	95.31	100	100	100	98.86	94.74	100	95.12	98.95	98.21	94.23	100	100	96.72	87.18	90.48	93.44	94.12	91.67	80.77	79.31	91.49	90.7	87.18
10120	100	100	100	98.81	100	100	100	100	100	99.07	100	98.41	100	95.31	98.78	98.65	92.73	96.3	95.52	99.38	97.4	98.72	99	98.61	96.08	95.31	100	100	100	98.86	94.74	100	95.12	98.95	98.21	94.23	100	100	96.72	87.18	90.48	93.44	94.12	91.67	80.77	82.76	91.49	90.7	87.18
10140	100	100	100	98.81	100	100	100	100	100	99.07	100	98.41	100	95.31	98.78	98.65	92.73	96.3	95.52	99.38	97.4	98.72	99	98.61	96.08	95.31	100	100	100	98.86	94.74	100	95.12	98.95	98.21	94.23	100	100	96.72	87.18	90.48	93.44	94.12	91.67	80.77	82.76	91.49	90.7	87.18
10160	100	100	100	98.81	100	100	100	100	100	99.07	100	98.41	100	95.31	98.78	98.65	92.73	96.3	95.52	99.38	97.4	100	99	98.61	98.04	95.31	100	100	100	98.86	94.74	100	95.12	98.95	98.21	94.23	100	100	96.72	87.18	90.48	93.44	94.12	91.67	80.77	82.76	91.49	90.7	87.18
10180	100	100	100	98.81	100	100	100	100	100	99.07	100	98.41	100	95.31	98.78	98.65	92.73	96.3	95.52	99.38	97.4	100	99	98.61	98.04	95.31	100	100	100	98.86	94.74	100	95.12	98.95	98.21	94.23	100	100	96.72	87.18	90.48	93.44	94.12	91.67	80.77	82.76	91.49	90.7	87.18
10200	100	100	100	98.81	100	100	100	100	100	99.07	100	98.41	100	95.31	98.78	98.65	92.73	96.3	95.52	99.38	97.4	100	99	98.61	98.04	95.31	100	100	100	98.86	94.74	100	95.12	98.95	98.21	94.23	100	100	96.72	87.18	90.48	93.44	94.12	91.67	80.77	82.76	91.49	90.7	87.18
10220	100	100	100	98.81	100	100	100	100	100	99.07	100	98.41	100	95.31	98.78	98.65	92.73	96.3	95.52	99.38	97.4	100	99	98.61	98.04	95.31	100	100	100	98.86	94.74	100	95.12	98.95	98.21	94.23	100	100	96.72	87.18	90.48	93.44	94.12	91.67	80.77	82.76	91.49	90.7	87.18
10240	100	100	100	98.81	100	100	100	100	100	99.07	100	98.41	100	95.31	98.78	98.65	92.73	96.3	95.52	99.38	97.4	100	99	98.61	98.04	95.31	100	100	100	98.86	94.74	100	95.12	98.95	98.21	94.23	100	100	96.72	87.18	90.48	93.44	94.12	91.67	80.77	82.76	91.49	90.7	87.18
10260	100	100	100	98.81	100	100	100	100	100	99.07	100	98.41	100	95.31	98.78	98.65	92.73	96.3	95.52	99.38	97.4	100	99	98.61	98.04	95.31	100	100	100	98.86	94.74	100	95.12	98.95	98.21	94.23	100	100	96.72	87.18	90.48	93.44	94.12	91.67	80.77	82.76	91.49	90.7	87.18
10280	100	100	100	98.81	100	100	100	100	100	99.07	100	98.41	100	95.31	98.78	98.65	92.73	96.3	95.52	100	98.7	100	99	98.61	98.04	95.31	100	100	100	98.86	94.74	100	95.12	98.95	98.21	94.23	100	100	96.72	87.18	90.48	93.44	94.12	91.67	80.77	82.76	91.49	90.7	87.18
10300	100	100	100	98.81	100	100	100	100	100	99.07	100	98.41	100	95.31	98.78	98.65	92.73	96.3	95.52	100	98.7	100	99	98.61	98.04	95.31	100	100	100	98.86	94.74	100	95.12	98.95	98.21	98.08	100	100	96.72	87.18	90.48	93.44	94.12	91.67	80.77	82.76	91.49	90.7	87.18
10320	100	100	100	98.81	100	100	100	100	100	99.07	100	98.41	100	95.31	98.78	98.65	92.73	96.3	95.52	100	98.7	100	99	98.61	98.04	95.31	100	100	100	98.86	94.74	100	95.12	98.95	98.21	98.08	100	100	96.72	87.18	90.48	93.44	94.12	91.67	80.77	82.76	91.49	90.7	87.18
10340	100	100	100	98.81	100	100	100	100	100	99.07	100	98.41	100	95.31	98.78	98.65	92.73	96.3	95.52	100	98.7	100	99	98.61	98.04	95.31	100	100	100	98.86	94.74	100	95.12	98.95	98.21	98.08	100	100	96.72	87.18	90.48	93.44	94.12	91.67	80.77	82.76	91.49	90.7	87.18
10360	100	100	100	98.81	100	100	100	100	100	99.07	100	98.41	100	95.31	98.78	98.65	92.73	96.3	95.52	100	98.7	100	99	98.61	98.04	95.31	100	100	100	98.86	94.74	100	95.12	98.95	98.21	98.08	100	100	96.72	87.18	90.48	93.44	94.12	91.67	80.77	82.76	91.49	90.7	87.18
10380	100	100	100	98.81	100	100	100	100	100	99.07	100	98.41	100	95.31	98.78	98.65	92.73	96.3	95.52	100	98.7	100	99	98.61	98.04	95.31	100	100	100	98.86	94.74	100	95.12	98.95	98.21	98.08	100	100	96.72	87.18	90.48	93.44	94.12	91.67	80.77	82.76	91.49	90.7	87.18
10400	100	100	100	98.81	100	100	100	100	100	99.07	100	98.41	100	95.31	98.78	98.65	92.73	96.3	95.52	100	98.7	100	99	98.61	98.04	95.31	100	100	100	98.86	94.74	100	95.12	98.95	98.21	98.08	100	100	96.72	87.18	90.48	93.44	94.12	91.67	80.77	82.76	91.49	90.7	87.18
10420	100	100	100	98.81	100	100	100	100	100	99.07	100	98.41	100	96.88	98.78	98.65	92.73	96.3	95.52	100	98.7	100	99	98.61	98.04	95.31	100	100	100	98.86	94.74	100	95.12	98.95	98.21	98.08	100	100	96.72	87.18	90.48	93.44	94.12	91.67	80.77	82.76	91.49	90.7	87.18
10440	100	100	100	98.81	100	100	100	100	100	99.07	100	98.41	100	96.88	98.78	98.65	92.73	96.3	95.52	100	98.7	100	99	98.61	98.04	95.31	100	100	100	98.86	94.74	100	95.12	98.95	98.21	98.08	100	100	96.72	87.18	90.48	93.44	94.12	91.67	80.77	82.76	91.49	90.7	87.18
10460	100	100	100	98.81	100	100	100	100	100	99.07	100	98.41	100	96.88	98.78	98.65	92.73	96.3	95.52	100	98.7	100	99	98.61	98.04	95.31	100	100	100	98.86	94.74	100	95.12	98.95	98.21	98.08	100	100	96.72	87.18	90.48	93.44	94.12	91.67	80.77	82.76	91.49	90.7	87.18
10480	100	100	100	98.81	100	100	100	100	100	99.07	100	98.41	100	96.88	98.78	98.65	92.73	96.3	95.52	100	98.7	100	99	98.61	98.04	95.31	100	100	100	98.86	94.74	100	95.12	98.95	98.21	98.08	100	100	96.72	87.18	90.48	93.44	94.12	91.67	80.77	82.76	91.49	90.7	87.18
10500	100	100	100	98.81	100	100	100	100	100	99.07	100	98.41	100	96.88	98.78	98.65	92.73	96.3	95.52	100	98.7	100	99	98.61	98.04	95.31	100	100	100	98.86	94.74	100	95.12	98.95	98.21	98.08	100	100	96.72	87.18	92.86	93.44	94.12	91.67	80.77	82.76	91.49	90.7	87.18
10520	100	100	100	98.81	100	100	100	100	100	99.07	100	98.41	100	96.88	98.78	98.65	92.73	96.3	95.52	100	98.7	100	99	98.61	98.04	95.31	100	100	100	98.86	94.74	100	95.12	98.95	98.21	98.08	100	100	96.72	87.18	92.86	93.44	94.12	91.67	80.77	82.76	91.49	90.7	87.18
10540	100	100	100	98.81	100	100	100	100	100	99.07	100	98.41	100	96.88	98.78	98.65	92.73	96.3	95.52	100	98.7	100	99	98.61	98.04	95.31	100	100	100	98.86	94.74	100	95.12	98.95	98.21	98.08	100	100	96.72	87.18	92.86	93.44	94.12	91.67	80.77	82.76	91.49	90.7	87.18
10560	100	100	100	98.81	100	100	100	100	100	99.07	100	98.41	100	96.88	98.78	98.65	92.73	96.3	95.52	100	98.7	100	99	98.61	98.04	95.31	100	100	100	98.86	94.74	100	95.12	98.95	98.21	98.08	100	100	96.72	87.18	92.86	93.44	94.12	91.67	80.77	82.76	91.49	90.7	87.18
10580	100	100	100	98.81	100	100	100	100	100	99.07	100	98.41	100	96.88	98.78	98.65	92.73	96.3	95.52	100	98.7	100	99	98.61	98.04	95.31	100	100	100	98.86	94.74	100	95.12	98.95	98.21	98.08	100	100	96.72	87.18	92.86	93.44	94.12	91.67	80.77	82.76	91.49	90.7	87.18
10600	100	100	100	98.81	100	100	100	100	100	99.07	100	98.41	100	96.88	98.78	98.65	92.73	96.3	95.52	100	98.7	100	99	98.61	98.04	95.31	100	100	100	98.86	94.74	100	95.12	98.95	98.21	98.08	100	100	96.72	87.18	92.86	93.44	94.12	91.67	80.77	82.76	91.49	90.7	87.18
10620	100	100	100	98.81	100	100	100	100	100	99.07	100	98.41	100	96.88	98.78	98.65	94.55	96.3	95.52	100	98.7	100	99	98.61	98.04	95.31	100	100	100	98.86	94.74	100	95.12	98.95	98.21	98.08	100	100	96.72	87.18	92.86	93.44	94.12	91.67	80.77	82.76	91.49	90.7	87.18
10640	100	100	100	98.81	100	100	100	100	100	99.07	100	98.41	100	96.88	98.78	98.65	94.55	96.3	95.52	100	98.7	100	99	98.61	98.04	95.31	100	100	100	98.86	94.74	100	95.12	98.95	98.21	98.08	100	100	96.72	87.18	92.86	93.44	94.12	91.67	80.77	82.76	91.49	90.7	87.18
10660	100	100	100	98.81	100	100	100	100	100	99.07	100	98.41	100	96.88	98.78	98.65	94.55	96.3	95.52	100	98.7	100	99	98.61	98.04	95.31	100	100	100	98.86	94.74	100	95.12	98.95	98.21	98.08	100	100	96.72	87.18	92.86	93.44	94.12	91.67	80.77	86.21	91.49	90.7	87.18
10680	100	100	100	98.81	100	100	100	100	100	99.07	100	98.41	100	96.88	98.78	98.65	94.55	96.3	95.52	100	98.7	100	99	98.61	98.04	95.31	100	100	100	98.86	94.74	100	95.12	98.95	98.21	98.08	100	100	96.72	87.18	92.86	93.44	94.12	91.67	80.77	86.21	91.49	90.7	87.18
10700	100	100	100	98.81	100	100	100	100	100	99.07	100	98.41	100	96.88	98.78	98.65	94.55	96.3	95.52	100	98.7	100	99	98.61	98.04	95.31	100	100	100	98.86	94.74	100	95.12	98.95	98.21	98.08	100	100	96.72	87.18	92.86	93.44	94.12	91.67	80.77	86.21	91.49	90.7	87.18
10720	100	100	100	98.81	100	100	100	100	100	99.07	100	98.41	100	96.88	98.78	98.65	94.55	96.3	95.52	100	98.7	100	99	98.61	98.04	95.31	100	100	100	98.86	94.74	100	95.12	98.95	98.21	98.08	100	100	96.72	87.18	92.86	93.44	94.12	91.67	80.77	86.21	91.49	90.7	87.18
10740	100	100	100	98.81	100	100	100	100	100	99.07	100	98.41	100	96.88	98.78	98.65	94.55	96.3	95.52	100	98.7	100	99	98.61	98.04	95.31	100	100	100	98.86	94.74	100	95.12	98.95	98.21	98.08	100	100	96.72	87.18	92.86	93.44	94.12	91.67	80.77	86.21	91.49	90.7	87.18
10760	100	100	100	98.81	100	100	100	100	100	99.07	100	98.41	100	96.88	98.78	98.65	94.55	96.3	95.52	100	98.7	100	99	98.61	98.04	95.31	100	100	100	98.86	94.74	100	95.12	98.95	98.21	98.08	100	100	96.72	87.18	92.86	95.08	94.12	91.67	80.77	86.21	91.49	90.7	87.18
10780	100	100	100	98.81	100	100	100	100	100	99.07	100	98.41	100	96.88	98.78	98.65	94.55	96.3	95.52	100	98.7	100	99	98.61	98.04	95.31	100	100	100	98.86	94.74	100	95.12	98.95	98.21	98.08	100	100	96.72	87.18	92.86	95.08	94.12	91.67	80.77	86.21	91.49	90.7	87.18
10800	100	100	100	98.81	100	100	100	100	100	99.07	100	98.41	100	96.88	98.78	98.65	94.55	96.3	95.52	100	98.7	100	99	98.61	98.04	95.31	100	100	100	98.86	94.74	100	95.12	98.95	98.21	98.08	100	100	96.72	87.18	92.86	95.08	94.12	91.67	80.77	86.21	91.49	90.7	87.18
10820	100	100	100	98.81	100	100	100	100	100	99.07	100	98.41	100	96.88	98.78	98.65	94.55	96.3	95.52	100	98.7	100	99	98.61	98.04	95.31	100	100	100	98.86	94.74	100	95.12	98.95	98.21	98.08	100	100	96.72	87.18	92.86	95.08	94.12	91.67	80.77	86.21	91.49	93.02	87.18
10840	100	100	100	98.81	100	100	100	100	100	99.07	100	98.41	100	96.88	98.78	98.65	94.55	96.3	95.52	100	98.7	100	99	98.61	98.04	95.31	100	100	100	98.86	94.74	100	95.12	98.95	98.21	98.08	100	100	96.72	87.18	92.86	95.08	94.12	91.67	80.77	86.21	91.49	93.02	87.18
10860	100	100	100	98.81	100	100	100	100	100	99.07	100	98.41	100	96.88	98.78	98.65	94.55	96.3	95.52	100	98.7	100	99	98.61	98.04	95.31	100	100	100	98.86	94.74	100	95.12	98.95	98.21	98.08	100	100	96.72	87.18	92.86	95.08	94.12	91.67	80.77	86.21	91.49	93.02	87.18
10880	100	100	100	98.81	100	100	100	100	100	99.07	100	98.41	100	96.88	98.78	98.65	94.55	96.3	95.52	100	98.7	100	99	98.61	98.04	95.31	100	100	100	98.86	94.74	100	95.12	98.95	98.21	98.08	100	100	96.72	87.18	92.86	95.08	94.12	91.67	80.77	89.66	91.49	93.02	87.18
10900	100	100	100	98.81	100	100	100	100	100	99.07	100	98.41	100	96.88	98.78	98.65	94.55	96.3	95.52	100	98.7	100	99	98.61	98.04	95.31	100	100	100	98.86	94.74	100	95.12	98.95	98.21	98.08	100	100	96.72	87.18	92.86	95.08	94.12	91.67	80.77	89.66	91.49	93.02	87.18
10920	100	100	100	98.81	100	100	100	100	100	99.07	100	98.41	100	96.88	98.78	98.65	94.55	96.3	95.52	100	98.7	100	99	98.61	98.04	95.31	100	100	100	98.86	94.74	100	95.12	98.95	98.21	98.08	100	100	96.72	87.18	92.86	95.08	94.12	91.67	80.77	89.66	91.49	93.02	87.18
10940	100	100	100	98.81	100	100	100	100	100	99.07	100	98.41	100	96.88	98.78	98.65	94.55	96.3	95.52	100	98.7	100	99	98.61	98.04	95.31	100	100	100	98.86	94.74	100	95.12	98.95	98.21	98.08	100	100	96.72	87.18	92.86	95.08	94.12	91.67	80.77	89.66	93.62	93.02	87.18
10960	100	100	100	98.81	100	100	100	100	100	99.07	100	98.41	100	96.88	98.78	98.65	94.55	96.3	95.52	100	98.7	100	99	98.61	98.04	95.31	100	100	100	98.86	94.74	100	95.12	98.95	98.21	98.08	100	100	96.72	87.18	92.86	95.08	94.12	91.67	80.77	89.66	93.62	93.02	87.18
10980	100	100	100	98.81	100	100	100	100	100	99.07	100	98.41	100	96.88	98.78	98.65	94.55	96.3	95.52	100	98.7	100	99	98.61	98.04	95.31	100	100	100	98.86	94.74	100	95.12	98.95	98.21	98.08	100	100	96.72	87.18	92.86	95.08	94.12	91.67	80.77	89.66	93.62	93.02	87.18
11000	100	100	100	98.81	100	100	100	100	100	99.07	100	98.41	100	96.88	98.78	98.65	94.55	96.3	95.52	100	98.7	100	99	98.61	98.04	95.31	100	100	100	98.86	94.74	100	95.12	98.95	98.21	98.08	100	100	96.72	87.18	92.86	95.08	94.12	91.67	80.77	89.66	93.62	93.02	87.18
11020	100	100	100	98.81	100	100	100	100	100	99.07	100	98.41	100	98.44	98.78	98.65	94.55	96.3	95.52	100	98.7	100	99	98.61	98.04	95.31	100	100	100	98.86	94.74	100	95.12	98.95	98.21	98.08	100	100	96.72	87.18	92.86	95.08	94.12	91.67	80.77	93.1	93.62	93.02	87.18
11040	100	100	100	98.81	100	100	100	100	100	99.07	100	98.41	100	98.44	98.78	98.65	94.55	96.3	95.52	100	98.7	100	99	98.61	98.04	95.31	100	100	100	98.86	94.74	100	95.12	98.95	98.21	98.08	100	100	96.72	87.18	92.86	95.08	94.12	91.67	80.77	93.1	93.62	93.02	87.18
11060	100	100	100	98.81	100	100	100	100	100	99.07	100	98.41	100	98.44	98.78	98.65	94.55	96.3	95.52	100	98.7	100	99	98.61	98.04	95.31	100	100	100	98.86	94.74	100	96.34	98.95	98.21	98.08	100	100	96.72	87.18	92.86	95.08	94.12	91.67	80.77	93.1	93.62	93.02	87.18
11080	100	100	100	98.81	100	100	100	100	100	99.07	100	98.41	100	98.44	98.78	98.65	94.55	96.3	95.52	100	98.7	100	99	98.61	98.04	95.31	100	100	100	98.86	94.74	100	96.34	98.95	98.21	98.08	100	100	96.72	87.18	92.86	95.08	94.12	91.67	80.77	93.1	93.62	93.02	87.18
11100	100	100	100	98.81	100	100	100	100	100	99.07	100	98.41	100	98.44	98.78	98.65	94.55	96.3	95.52	100	98.7	100	99	98.61	98.04	95.31	100	100	100	98.86	94.74	100	96.34	98.95	98.21	98.08	100	100	96.72	87.18	92.86	95.08	94.12	91.67	80.77	93.1	93.62	93.02	87.18
11120	100	100	100	98.81	100	100	100	100	100	99.07	100	98.41	100	98.44	98.78	98.65	94.55	96.3	95.52	100	98.7	100	99	98.61	98.04	95.31	100	100	100	98.86	94.74	100	96.34	98.95	98.21	98.08	100	100	96.72	87.18	92.86	95.08	94.12	91.67	80.77	93.1	93.62	95.35	87.18
11140	100	100	100	98.81	100	100	100	100	100	99.07	100	98.41	100	98.44	98.78	98.65	94.55	96.3	95.52	100	98.7	100	100	98.61	98.04	95.31	100	100	100	98.86	94.74	100	96.34	98.95	98.21	98.08	100	100	96.72	87.18	92.86	95.08	94.12	91.67	80.77	93.1	93.62	95.35	87.18
11160	100	100	100	98.81	100	100	100	100	100	99.07	100	98.41	100	98.44	98.78	98.65	94.55	96.3	95.52	100	98.7	100	100	98.61	98.04	95.31	100	100	100	98.86	94.74	100	96.34	98.95	98.21	98.08	100	100	96.72	87.18	92.86	95.08	94.12	91.67	80.77	93.1	93.62	95.35	87.18
11180	100	100	100	98.81	100	100	100	100	100	99.07	100	98.41	100	98.44	98.78	98.65	94.55	96.3	95.52	100	98.7	100	100	98.61	98.04	95.31	100	100	100	98.86	94.74	100	96.34	98.95	98.21	98.08	100	100	96.72	87.18	92.86	95.08	94.12	91.67	80.77	93.1	93.62	95.35	87.18
11200	100	100	100	98.81	100	100	100	100	100	99.07	100	98.41	100	98.44	98.78	98.65	94.55	96.3	95.52	100	98.7	100	100	98.61	98.04	95.31	100	100	100	98.86	94.74	100	96.34	98.95	98.21	98.08	100	100	96.72	87.18	92.86	95.08	94.12	91.67	80.77	93.1	93.62	95.35	87.18
11220	100	100	100	98.81	100	100	100	100	100	99.07	100	98.41	100	98.44	98.78	98.65	94.55	96.3	95.52	100	98.7	100	100	98.61	98.04	95.31	100	100	100	98.86	94.74	100	96.34	98.95	98.21	98.08	100	100	96.72	87.18	92.86	95.08	94.12	91.67	80.77	93.1	93.62	95.35	87.18
11240	100	100	100	98.81	100	100	100	100	100	99.07	100	98.41	100	98.44	98.78	98.65	94.55	96.3	95.52	100	98.7	100	100	98.61	98.04	95.31	100	100	100	98.86	94.74	100	96.34	98.95	98.21	98.08	100	100	96.72	87.18	92.86	95.08	94.12	91.67	80.77	93.1	93.62	95.35	87.18
11260	100	100	100	98.81	100	100	100	100	100	99.07	100	98.41	100	98.44	98.78	98.65	94.55	96.3	95.52	100	98.7	100	100	98.61	98.04	95.31	100	100	100	98.86	94.74	100	96.34	98.95	98.21	98.08	100	100	96.72	87.18	92.86	95.08	94.12	91.67	80.77	93.1	93.62	95.35	87.18
11280	100	100	100	98.81	100	100	100	100	100	99.07	100	98.41	100	98.44	98.78	98.65	94.55	96.3	95.52	100	98.7	100	100	98.61	98.04	95.31	100	100	100	98.86	94.74	100	96.34	98.95	98.21	98.08	100	100	96.72	87.18	92.86	95.08	94.12	91.67	80.77	93.1	93.62	95.35	87.18
11300	100	100	100	98.81	100	100	100	100	100	99.07	100	98.41	100	98.44	98.78	98.65	94.55	96.3	95.52	100	98.7	100	100	98.61	98.04	95.31	100	100	100	98.86	94.74	100	96.34	98.95	98.21	98.08	100	100	96.72	87.18	92.86	95.08	94.12	91.67	80.77	93.1	93.62	95.35	87.18
11320	100	100	100	98.81	100	100	100	100	100	99.07	100	98.41	100	98.44	98.78	98.65	94.55	96.3	95.52	100	98.7	100	100	98.61	98.04	95.31	100	100	100	98.86	94.74	100	96.34	98.95	98.21	98.08	100	100	96.72	87.18	92.86	95.08	94.12	91.67	80.77	93.1	93.62	95.35	87.18
11340	100	100	100	98.81	100	100	100	100	100	100	100	98.41	100	98.44	98.78	98.65	94.55	96.3	95.52	100	98.7	100	100	98.61	98.04	96.88	100	100	100	98.86	96.49	100	96.34	98.95	98.21	98.08	100	100	96.72	87.18	92.86	95.08	94.12	91.67	80.77	93.1	93.62	95.35	87.18
11360	100	100	100	98.81	100	100	100	100	100	100	100	98.41	100	98.44	98.78	98.65	94.55	96.3	95.52	100	98.7	100	100	98.61	98.04	96.88	100	100	100	98.86	96.49	100	96.34	98.95	98.21	98.08	100	100	96.72	87.18	92.86	95.08	94.12	91.67	80.77	93.1	93.62	95.35	87.18
11380	100	100	100	98.81	100	100	100	100	100	100	100	98.41	100	98.44	98.78	98.65	94.55	96.3	95.52	100	98.7	100	100	98.61	98.04	96.88	100	100	100	98.86	96.49	100	96.34	98.95	98.21	98.08	100	100	96.72	87.18	92.86	95.08	94.12	91.67	80.77	93.1	93.62	95.35	87.18
11400	100	100	100	98.81	100	100	100	100	100	100	100	98.41	100	98.44	98.78	98.65	94.55	96.3	95.52	100	98.7	100	100	98.61	98.04	96.88	100	100	100	98.86	96.49	100	96.34	98.95	98.21	98.08	100	100	96.72	87.18	92.86	95.08	94.12	91.67	80.77	93.1	93.62	95.35	87.18
11420	100	100	100	98.81	100	100	100	100	100	100	100	98.41	100	98.44	98.78	98.65	94.55	96.3	95.52	100	98.7	100	100	98.61	98.04	96.88	100	100	100	98.86	96.49	100	96.34	98.95	98.21	98.08	100	100	98.36	87.18	95.24	95.08	94.12	94.44	80.77	93.1	93.62	95.35	87.18
11440	100	100	100	98.81	100	100	100	100	100	100	100	98.41	100	98.44	98.78	98.65	94.55	96.3	95.52	100	98.7	100	100	98.61	98.04	96.88	100	100	100	98.86	96.49	100	96.34	98.95	98.21	98.08	100	100	98.36	87.18	95.24	95.08	94.12	94.44	80.77	93.1	93.62	95.35	87.18
11460	100	100	100	98.81	100	100	100	100	100	100	100	98.41	100	98.44	98.78	98.65	94.55	96.3	95.52	100	98.7	100	100	98.61	98.04	96.88	100	100	100	98.86	96.49	100	96.34	98.95	98.21	98.08	100	100	98.36	87.18	95.24	95.08	94.12	94.44	80.77	93.1	93.62	95.35	87.18
11480	100	100	100	98.81	100	100	100	100	100	100	100	98.41	100	98.44	98.78	98.65	94.55	96.3	95.52	100	98.7	100	100	98.61	98.04	96.88	100	100	100	98.86	96.49	100	96.34	98.95	98.21	98.08	100	100	98.36	87.18	95.24	95.08	94.12	94.44	80.77	93.1	93.62	95.35	87.18
11500	100	100	100	98.81	100	100	100	100	100	100	100	98.41	100	98.44	98.78	98.65	94.55	96.3	95.52	100	98.7	100	100	98.61	98.04	96.88	100	100	100	98.86	96.49	100	96.34	98.95	98.21	98.08	100	100	98.36	87.18	95.24	95.08	94.12	94.44	80.77	93.1	93.62	95.35	87.18
11520	100	100	100	98.81	100	100	100	100	100	100	100	98.41	100	98.44	98.78	98.65	94.55	96.3	95.52	100	98.7	100	100	98.61	98.04	96.88	100	100	100	98.86	96.49	100	96.34	98.95	98.21	98.08	100	100	98.36	87.18	95.24	95.08	94.12	94.44	80.77	93.1	93.62	95.35	87.18
11540	100	100	100	98.81	100	100	100	100	100	100	100	98.41	100	98.44	98.78	98.65	94.55	96.3	95.52	100	98.7	100	100	98.61	98.04	96.88	100	100	100	98.86	96.49	100	96.34	98.95	98.21	98.08	100	100	98.36	87.18	95.24	95.08	94.12	94.44	80.77	93.1	93.62	95.35	87.18
11560	100	100	100	98.81	100	100	100	100	100	100	100	98.41	100	98.44	98.78	98.65	94.55	96.3	95.52	100	98.7	100	100	98.61	98.04	96.88	100	100	100	98.86	96.49	100	96.34	98.95	98.21	98.08	100	100	98.36	89.74	95.24	95.08	94.12	94.44	80.77	93.1	93.62	95.35	87.18
11580	100	100	100	98.81	100	100	100	100	100	100	100	98.41	100	98.44	98.78	98.65	94.55	96.3	95.52	100	98.7	100	100	98.61	98.04	96.88	100	100	100	98.86	96.49	100	96.34	98.95	98.21	98.08	100	100	98.36	89.74	95.24	95.08	94.12	94.44	80.77	93.1	93.62	95.35	87.18
11600	100	100	100	98.81	100	100	100	100	100	100	100	98.41	100	98.44	98.78	98.65	94.55	96.3	95.52	100	98.7	100	100	98.61	98.04	96.88	100	100	100	98.86	96.49	100	96.34	98.95	98.21	98.08	100	100	98.36	89.74	95.24	95.08	94.12	94.44	80.77	93.1	93.62	95.35	87.18
11620	100	100	100	98.81	100	100	100	100	100	100	100	98.41	100	100	98.78	98.65	94.55	96.3	95.52	100	98.7	100	100	98.61	98.04	96.88	100	100	100	98.86	96.49	100	96.34	98.95	98.21	98.08	100	100	98.36	89.74	95.24	95.08	94.12	94.44	80.77	93.1	93.62	95.35	87.18
11640	100	100	100	98.81	100	100	100	100	100	100	100	98.41	100	100	98.78	98.65	94.55	96.3	95.52	100	98.7	100	100	98.61	98.04	96.88	100	100	100	98.86	96.49	100	96.34	98.95	98.21	98.08	100	100	98.36	89.74	95.24	95.08	94.12	94.44	80.77	93.1	93.62	95.35	87.18
11660	100	100	100	98.81	100	100	100	100	100	100	100	98.41	100	100	98.78	98.65	94.55	96.3	95.52	100	98.7	100	100	98.61	98.04	96.88	100	100	100	98.86	96.49	100	96.34	98.95	98.21	98.08	100	100	98.36	89.74	95.24	95.08	94.12	94.44	80.77	93.1	93.62	95.35	87.18
11680	100	100	100	98.81	100	100	100	100	100	100	100	98.41	100	100	98.78	98.65	94.55	96.3	95.52	100	98.7	100	100	98.61	98.04	96.88	100	100	100	98.86	96.49	100	96.34	98.95	98.21	98.08	100	100	98.36	89.74	97.62	95.08	94.12	94.44	80.77	93.1	93.62	95.35	87.18
11700	100	100	100	98.81	100	100	100	100	100	100	100	98.41	100	100	98.78	98.65	94.55	96.3	95.52	100	98.7	100	100	98.61	98.04	96.88	100	100	100	98.86	96.49	100	96.34	98.95	98.21	98.08	100	100	98.36	89.74	97.62	95.08	94.12	94.44	80.77	93.1	95.74	95.35	89.74
11720	100	100	100	98.81	100	100	100	100	100	100	100	98.41	100	100	98.78	98.65	94.55	96.3	95.52	100	98.7	100	100	98.61	98.04	96.88	100	100	100	98.86	96.49	100	96.34	98.95	98.21	98.08	100	100	98.36	89.74	97.62	95.08	94.12	94.44	80.77	93.1	95.74	95.35	89.74
11740	100	100	100	98.81	100	100	100	100	100	100	100	98.41	100	100	98.78	98.65	96.36	96.3	95.52	100	98.7	100	100	98.61	98.04	96.88	100	100	100	98.86	96.49	100	96.34	98.95	98.21	98.08	100	100	98.36	89.74	97.62	95.08	94.12	94.44	80.77	93.1	95.74	95.35	89.74
11760	100	100	100	98.81	100	100	100	100	100	100	100	98.41	100	100	98.78	98.65	96.36	96.3	95.52	100	98.7	100	100	98.61	98.04	96.88	100	100	100	98.86	96.49	100	96.34	98.95	98.21	98.08	100	100	98.36	89.74	97.62	96.72	94.12	94.44	80.77	93.1	95.74	95.35	89.74
11780	100	100	100	98.81	100	100	100	100	100	100	100	98.41	100	100	98.78	98.65	96.36	96.3	95.52	100	98.7	100	100	98.61	98.04	96.88	100	100	100	98.86	96.49	100	96.34	98.95	98.21	98.08	100	100	98.36	89.74	97.62	96.72	94.12	94.44	80.77	93.1	95.74	95.35	89.74
11800	100	100	100	98.81	100	100	100	100	100	100	100	98.41	100	100	98.78	98.65	96.36	96.3	95.52	100	98.7	100	100	98.61	98.04	96.88	100	100	100	98.86	96.49	100	96.34	98.95	98.21	98.08	100	100	98.36	89.74	97.62	96.72	94.12	94.44	80.77	93.1	95.74	95.35	89.74
11820	100	100	100	98.81	100	100	100	100	100	100	100	98.41	100	100	98.78	98.65	96.36	96.3	95.52	100	98.7	100	100	98.61	98.04	96.88	100	100	100	98.86	96.49	100	96.34	98.95	98.21	98.08	100	100	98.36	89.74	97.62	96.72	94.12	94.44	80.77	93.1	95.74	95.35	89.74
11840	100	100	100	98.81	100	100	100	100	100	100	100	98.41	100	100	98.78	98.65	96.36	96.3	95.52	100	98.7	100	100	98.61	98.04	96.88	100	100	100	98.86	96.49	100	96.34	98.95	98.21	98.08	100	100	98.36	89.74	97.62	96.72	94.12	94.44	80.77	93.1	95.74	95.35	89.74
11860	100	100	100	98.81	100	100	100	100	100	100	100	98.41	100	100	98.78	98.65	96.36	96.3	95.52	100	98.7	100	100	98.61	98.04	96.88	100	100	100	98.86	96.49	100	96.34	98.95	98.21	98.08	100	100	98.36	89.74	97.62	96.72	94.12	94.44	80.77	93.1	95.74	95.35	89.74
11880	100	100	100	98.81	100	100	100	100	100	100	100	98.41	100	100	98.78	98.65	96.36	96.3	97.01	100	98.7	100	100	98.61	98.04	96.88	100	100	100	98.86	96.49	100	96.34	98.95	98.21	98.08	100	100	98.36	89.74	97.62	96.72	94.12	94.44	80.77	93.1	95.74	95.35	89.74
11900	100	100	100	98.81	100	100	100	100	100	100	100	98.41	100	100	98.78	98.65	96.36	96.3	97.01	100	98.7	100	100	98.61	98.04	96.88	100	100	100	98.86	96.49	100	96.34	98.95	98.21	98.08	100	100	98.36	89.74	97.62	96.72	94.12	94.44	80.77	93.1	95.74	95.35	89.74
11920	100	100	100	98.81	100	100	100	100	100	100	100	98.41	100	100	98.78	98.65	96.36	96.3	97.01	100	98.7	100	100	98.61	98.04	96.88	100	100	100	98.86	96.49	100	96.34	98.95	98.21	98.08	100	100	98.36	89.74	97.62	96.72	94.12	94.44	80.77	93.1	95.74	95.35	89.74
11940	100	100	100	98.81	100	100	100	100	100	100	100	98.41	100	100	98.78	98.65	96.36	96.3	97.01	100	98.7	100	100	98.61	98.04	96.88	100	100	100	98.86	96.49	100	96.34	98.95	98.21	98.08	100	100	98.36	89.74	97.62	96.72	94.12	94.44	80.77	93.1	95.74	95.35	89.74
11960	100	100	100	98.81	100	100	100	100	100	100	100	98.41	100	100	98.78	98.65	96.36	96.3	97.01	100	98.7	100	100	98.61	98.04	96.88	100	100	100	98.86	96.49	100	96.34	98.95	98.21	98.08	100	100	98.36	89.74	97.62	96.72	94.12	94.44	80.77	93.1	95.74	95.35	89.74
11980	100	100	100	98.81	100	100	100	100	100	100	100	98.41	100	100	98.78	98.65	96.36	96.3	97.01	100	98.7	100	100	98.61	100	96.88	100	100	100	98.86	96.49	100	96.34	98.95	98.21	98.08	100	100	98.36	89.74	97.62	96.72	94.12	94.44	80.77	93.1	95.74	95.35	89.74
12000	100	100	100	98.81	100	100	100	100	100	100	100	98.41	100	100	98.78	98.65	96.36	96.3	97.01	100	98.7	100	100	98.61	100	96.88	100	100	100	98.86	96.49	100	96.34	98.95	98.21	98.08	100	100	98.36	89.74	97.62	96.72	94.12	94.44	80.77	93.1	95.74	95.35	89.74
12020	100	100	100	98.81	100	100	100	100	100	100	100	98.41	100	100	98.78	98.65	96.36	96.3	97.01	100	98.7	100	100	98.61	100	96.88	100	100	100	98.86	96.49	100	96.34	98.95	98.21	98.08	100	100	98.36	89.74	97.62	96.72	94.12	94.44	80.77	93.1	95.74	95.35	89.74
12040	100	100	100	98.81	100	100	100	100	100	100	100	98.41	100	100	98.78	98.65	96.36	96.3	97.01	100	98.7	100	100	98.61	100	96.88	100	100	100	98.86	96.49	100	96.34	98.95	98.21	98.08	100	100	98.36	89.74	97.62	96.72	94.12	97.22	80.77	93.1	95.74	95.35	89.74
12060	100	100	100	98.81	100	100	100	100	100	100	100	98.41	100	100	98.78	98.65	96.36	96.3	97.01	100	98.7	100	100	98.61	100	96.88	100	100	100	98.86	96.49	100	96.34	98.95	98.21	98.08	100	100	98.36	89.74	97.62	96.72	94.12	97.22	80.77	93.1	95.74	95.35	89.74
12080	100	100	100	98.81	100	100	100	100	100	100	100	98.41	100	100	98.78	98.65	96.36	96.3	97.01	100	98.7	100	100	98.61	100	96.88	100	100	100	98.86	96.49	100	96.34	98.95	98.21	98.08	100	100	98.36	89.74	97.62	96.72	94.12	97.22	80.77	93.1	95.74	95.35	89.74
12100	100	100	100	98.81	100	100	100	100	100	100	100	98.41	100	100	98.78	98.65	96.36	96.3	97.01	100	98.7	100	100	98.61	100	96.88	100	100	100	98.86	96.49	100	96.34	98.95	98.21	98.08	100	100	98.36	89.74	97.62	96.72	94.12	97.22	80.77	93.1	95.74	95.35	89.74
12120	100	100	100	98.81	100	100	100	100	100	100	100	98.41	100	100	98.78	98.65	96.36	96.3	97.01	100	98.7	100	100	98.61	100	96.88	100	100	100	98.86	96.49	100	96.34	100	98.21	98.08	100	100	98.36	89.74	97.62	96.72	94.12	97.22	80.77	93.1	95.74	95.35	89.74
12140	100	100	100	98.81	100	100	100	100	100	100	100	98.41	100	100	98.78	98.65	96.36	96.3	97.01	100	98.7	100	100	98.61	100	96.88	100	100	100	98.86	96.49	100	96.34	100	98.21	98.08	100	100	98.36	89.74	97.62	96.72	94.12	97.22	80.77	93.1	95.74	95.35	89.74
12160	100	100	100	98.81	100	100	100	100	100	100	100	98.41	100	100	98.78	98.65	96.36	96.3	97.01	100	98.7	100	100	98.61	100	96.88	100	100	100	98.86	96.49	100	96.34	100	98.21	98.08	100	100	98.36	89.74	97.62	96.72	94.12	97.22	80.77	93.1	95.74	95.35	89.74
12180	100	100	100	98.81	100	100	100	100	100	100	100	98.41	100	100	98.78	98.65	96.36	96.3	97.01	100	98.7	100	100	98.61	100	96.88	100	100	100	98.86	96.49	100	96.34	100	98.21	98.08	100	100	98.36	89.74	97.62	96.72	94.12	97.22	80.77	93.1	95.74	95.35	89.74
12200	100	100	100	98.81	100	100	100	100	100	100	100	98.41	100	100	98.78	98.65	96.36	96.3	97.01	100	98.7	100	100	98.61	100	96.88	100	100	100	98.86	98.25	100	96.34	100	98.21	98.08	100	100	98.36	89.74	97.62	96.72	94.12	97.22	80.77	93.1	95.74	95.35	89.74
12220	100	100	100	98.81	100	100	100	100	100	100	100	98.41	100	100	98.78	98.65	96.36	96.3	97.01	100	98.7	100	100	98.61	100	96.88	100	100	100	98.86	98.25	100	96.34	100	98.21	98.08	100	100	98.36	89.74	97.62	96.72	94.12	97.22	80.77	93.1	95.74	95.35	89.74
12240	100	100	100	98.81	100	100	100	100	100	100	100	98.41	100	100	98.78	98.65	98.18	96.3	97.01	100	98.7	100	100	98.61	100	96.88	100	100	100	98.86	98.25	100	96.34	100	98.21	98.08	100	100	98.36	89.74	97.62	96.72	94.12	97.22	80.77	93.1	95.74	95.35	89.74
12260	100	100	100	98.81	100	100	100	100	100	100	100	98.41	100	100	98.78	98.65	98.18	96.3	97.01	100	98.7	100	100	98.61	100	96.88	100	100	100	98.86	98.25	100	96.34	100	98.21	98.08	100	100	98.36	89.74	97.62	96.72	94.12	97.22	80.77	93.1	95.74	95.35	89.74
12280	100	100	100	98.81	100	100	100	100	100	100	100	98.41	100	100	98.78	98.65	98.18	96.3	97.01	100	98.7	100	100	98.61	100	96.88	100	100	100	98.86	98.25	100	96.34	100	98.21	98.08	100	100	98.36	89.74	97.62	96.72	94.12	97.22	80.77	93.1	95.74	95.35	89.74
12300	100	100	100	98.81	100	100	100	100	100	100	100	98.41	100	100	98.78	98.65	98.18	96.3	97.01	100	98.7	100	100	98.61	100	96.88	100	100	100	98.86	98.25	100	96.34	100	98.21	98.08	100	100	98.36	89.74	97.62	96.72	94.12	97.22	80.77	93.1	95.74	95.35	89.74
12320	100	100	100	98.81	100	100	100	100	100	100	100	98.41	100	100	98.78	98.65	98.18	96.3	97.01	100	98.7	100	100	98.61	100	96.88	100	100	100	98.86	98.25	100	96.34	100	98.21	98.08	100	100	98.36	89.74	97.62	96.72	94.12	97.22	80.77	93.1	95.74	95.35	89.74
12340	100	100	100	98.81	100	100	100	100	100	100	100	98.41	100	100	98.78	98.65	98.18	96.3	97.01	100	98.7	100	100	98.61	100	96.88	100	100	100	98.86	98.25	100	96.34	100	98.21	98.08	100	100	98.36	89.74	97.62	96.72	94.12	97.22	80.77	93.1	95.74	95.35	89.74
12360	100	100	100	98.81	100	100	100	100	100	100	100	98.41	100	100	98.78	98.65	98.18	96.3	97.01	100	98.7	100	100	98.61	100	96.88	100	100	100	98.86	98.25	100	96.34	100	98.21	98.08	100	100	98.36	89.74	97.62	96.72	94.12	97.22	80.77	93.1	95.74	95.35	89.74
12380	100	100	100	98.81	100	100	100	100	100	100	100	98.41	100	100	98.78	98.65	98.18	96.3	97.01	100	98.7	100	100	98.61	100	96.88	100	100	100	98.86	98.25	100	96.34	100	98.21	98.08	100	100	98.36	89.74	97.62	96.72	94.12	97.22	80.77	93.1	95.74	95.35	89.74
12400	100	100	100	98.81	100	100	100	100	100	100	100	98.41	100	100	98.78	98.65	98.18	96.3	97.01	100	98.7	100	100	98.61	100	96.88	100	100	100	98.86	98.25	100	96.34	100	98.21	98.08	100	100	98.36	89.74	97.62	96.72	94.12	97.22	80.77	93.1	95.74	95.35	89.74
12420	100	100	100	98.81	100	100	100	100	100	100	100	98.41	100	100	98.78	98.65	98.18	96.3	97.01	100	98.7	100	100	98.61	100	96.88	100	100	100	98.86	98.25	100	96.34	100	98.21	98.08	100	100	98.36	89.74	97.62	96.72	94.12	97.22	80.77	93.1	95.74	95.35	89.74
12440	100	100	100	98.81	100	100	100	100	100	100	100	98.41	100	100	98.78	98.65	98.18	96.3	97.01	100	98.7	100	100	98.61	100	96.88	100	100	100	98.86	98.25	100	97.56	100	98.21	98.08	100	100	98.36	89.74	97.62	96.72	94.12	97.22	80.77	93.1	95.74	95.35	89.74
12460	100	100	100	98.81	100	100	100	100	100	100	100	98.41	100	100	98.78	98.65	98.18	96.3	97.01	100	98.7	100	100	98.61	100	96.88	100	100	100	98.86	98.25	100	97.56	100	98.21	98.08	100	100	98.36	89.74	97.62	96.72	94.12	97.22	80.77	93.1	95.74	95.35	89.74
12480	100	100	100	98.81	100	100	100	100	100	100	100	98.41	100	100	98.78	98.65	98.18	96.3	97.01	100	98.7	100	100	98.61	100	96.88	100	100	100	98.86	98.25	100	97.56	100	98.21	98.08	100	100	98.36	92.31	97.62	96.72	94.12	97.22	80.77	93.1	95.74	95.35	89.74
12500	100	100	100	98.81	100	100	100	100	100	100	100	98.41	100	100	98.78	98.65	98.18	96.3	97.01	100	98.7	100	100	98.61	100	96.88	100	100	100	98.86	98.25	100	97.56	100	98.21	98.08	100	100	98.36	92.31	97.62	96.72	94.12	97.22	80.77	93.1	95.74	95.35	89.74
12520	100	100	100	98.81	100	100	100	100	100	100	100	98.41	100	100	98.78	98.65	98.18	96.3	97.01	100	98.7	100	100	98.61	100	96.88	100	100	100	98.86	98.25	100	97.56	100	98.21	98.08	100	100	98.36	92.31	97.62	96.72	94.12	97.22	80.77	93.1	95.74	95.35	89.74
12540	100	100	100	98.81	100	100	100	100	100	100	100	98.41	100	100	98.78	98.65	98.18	96.3	97.01	100	98.7	100	100	98.61	100	96.88	100	100	100	98.86	98.25	100	97.56	100	98.21	98.08	100	100	98.36	92.31	97.62	96.72	94.12	97.22	80.77	93.1	95.74	95.35	89.74
12560	100	100	100	98.81	100	100	100	100	100	100	100	98.41	100	100	98.78	98.65	98.18	96.3	97.01	100	98.7	100	100	98.61	100	96.88	100	100	100	98.86	98.25	100	97.56	100	100	98.08	100	100	98.36	92.31	97.62	96.72	94.12	97.22	80.77	93.1	95.74	97.67	92.31
12580	100	100	100	98.81	100	100	100	100	100	100	100	98.41	100	100	98.78	98.65	98.18	96.3	97.01	100	98.7	100	100	98.61	100	96.88	100	100	100	98.86	98.25	100	97.56	100	100	98.08	100	100	98.36	92.31	97.62	96.72	94.12	97.22	80.77	93.1	95.74	97.67	92.31
12600	100	100	100	98.81	100	100	100	100	100	100	100	98.41	100	100	98.78	98.65	98.18	98.15	97.01	100	98.7	100	100	98.61	100	96.88	100	100	100	98.86	98.25	100	97.56	100	100	98.08	100	100	98.36	92.31	97.62	96.72	94.12	97.22	80.77	93.1	95.74	97.67	92.31
12620	100	100	100	98.81	100	100	100	100	100	100	100	98.41	100	100	98.78	98.65	98.18	98.15	97.01	100	98.7	100	100	98.61	100	96.88	100	100	100	98.86	98.25	100	97.56	100	100	98.08	100	100	98.36	92.31	97.62	96.72	94.12	97.22	80.77	93.1	95.74	97.67	92.31
12640	100	100	100	98.81	100	100	100	100	100	100	100	98.41	100	100	98.78	98.65	98.18	98.15	97.01	100	98.7	100	100	98.61	100	96.88	100	100	100	98.86	98.25	100	97.56	100	100	98.08	100	100	98.36	92.31	97.62	96.72	94.12	97.22	80.77	93.1	95.74	97.67	92.31
12660	100	100	100	98.81	100	100	100	100	100	100	100	98.41	100	100	98.78	98.65	98.18	98.15	97.01	100	98.7	100	100	98.61	100	96.88	100	100	100	98.86	98.25	100	97.56	100	100	98.08	100	100	98.36	92.31	97.62	96.72	94.12	97.22	80.77	93.1	95.74	97.67	92.31
12680	100	100	100	98.81	100	100	100	100	100	100	100	98.41	100	100	98.78	98.65	98.18	98.15	97.01	100	98.7	100	100	98.61	100	96.88	100	100	100	98.86	98.25	100	97.56	100	100	98.08	100	100	98.36	94.87	97.62	96.72	94.12	97.22	80.77	93.1	95.74	97.67	92.31
12700	100	100	100	98.81	100	100	100	100	100	100	100	98.41	100	100	98.78	98.65	98.18	98.15	97.01	100	98.7	100	100	98.61	100	96.88	100	100	100	98.86	98.25	100	97.56	100	100	98.08	100	100	98.36	94.87	97.62	96.72	94.12	97.22	80.77	93.1	95.74	97.67	92.31
12720	100	100	100	98.81	100	100	100	100	100	100	100	98.41	100	100	98.78	98.65	98.18	98.15	97.01	100	98.7	100	100	98.61	100	96.88	100	100	100	98.86	98.25	100	97.56	100	100	98.08	100	100	98.36	94.87	97.62	96.72	94.12	97.22	80.77	93.1	95.74	97.67	92.31
12740	100	100	100	98.81	100	100	100	100	100	100	100	98.41	100	100	98.78	98.65	98.18	98.15	97.01	100	98.7	100	100	98.61	100	96.88	100	100	100	98.86	98.25	100	97.56	100	100	98.08	100	100	98.36	94.87	97.62	96.72	94.12	97.22	80.77	93.1	95.74	97.67	92.31
12760	100	100	100	98.81	100	100	100	100	100	100	100	98.41	100	100	98.78	98.65	98.18	98.15	97.01	100	98.7	100	100	98.61	100	96.88	100	100	100	98.86	98.25	100	97.56	100	100	98.08	100	100	98.36	94.87	97.62	96.72	94.12	97.22	80.77	93.1	95.74	97.67	92.31
12780	100	100	100	98.81	100	100	100	100	100	100	100	98.41	100	100	98.78	98.65	98.18	98.15	97.01	100	98.7	100	100	98.61	100	96.88	100	100	100	98.86	98.25	100	97.56	100	100	98.08	100	100	98.36	94.87	97.62	96.72	94.12	97.22	80.77	93.1	95.74	97.67	92.31
12800	100	100	100	98.81	100	100	100	100	100	100	100	98.41	100	100	98.78	98.65	98.18	98.15	98.51	100	98.7	100	100	98.61	100	96.88	100	100	100	98.86	98.25	100	97.56	100	100	98.08	100	100	98.36	94.87	97.62	96.72	94.12	97.22	80.77	93.1	95.74	97.67	92.31
12820	100	100	100	98.81	100	100	100	100	100	100	100	98.41	100	100	98.78	98.65	98.18	98.15	98.51	100	98.7	100	100	98.61	100	96.88	100	100	100	98.86	98.25	100	97.56	100	100	98.08	100	100	98.36	94.87	97.62	96.72	94.12	97.22	80.77	93.1	95.74	97.67	92.31
12840	100	100	100	98.81	100	100	100	100	100	100	100	98.41	100	100	98.78	98.65	98.18	98.15	98.51	100	98.7	100	100	98.61	100	96.88	100	100	100	98.86	98.25	100	97.56	100	100	98.08	100	100	98.36	94.87	97.62	96.72	94.12	97.22	80.77	93.1	97.87	97.67	92.31
12860	100	100	100	98.81	100	100	100	100	100	100	100	98.41	100	100	98.78	98.65	98.18	98.15	98.51	100	98.7	100	100	98.61	100	96.88	100	100	100	98.86	98.25	100	97.56	100	100	98.08	100	100	98.36	94.87	97.62	96.72	94.12	97.22	80.77	93.1	97.87	97.67	92.31
12880	100	100	100	98.81	100	100	100	100	100	100	100	98.41	100	100	98.78	98.65	98.18	98.15	98.51	100	98.7	100	100	100	100	96.88	100	100	100	98.86	98.25	100	97.56	100	100	98.08	100	100	100	94.87	97.62	96.72	94.12	97.22	80.77	93.1	97.87	97.67	92.31
12900	100	100	100	98.81	100	100	100	100	100	100	100	98.41	100	100	98.78	98.65	98.18	98.15	98.51	100	98.7	100	100	100	100	96.88	100	100	100	98.86	98.25	100	97.56	100	100	98.08	100	100	100	94.87	97.62	96.72	94.12	97.22	80.77	93.1	97.87	97.67	92.31
12920	100	100	100	98.81	100	100	100	100	100	100	100	98.41	100	100	98.78	98.65	98.18	98.15	98.51	100	98.7	100	100	100	100	96.88	100	100	100	98.86	98.25	100	97.56	100	100	98.08	100	100	100	94.87	97.62	96.72	94.12	97.22	80.77	93.1	97.87	97.67	92.31
12940	100	100	100	98.81	100	100	100	100	100	100	100	98.41	100	100	98.78	98.65	98.18	98.15	98.51	100	98.7	100	100	100	100	96.88	100	100	100	98.86	98.25	100	97.56	100	100	98.08	100	100	100	94.87	97.62	96.72	94.12	97.22	80.77	93.1	97.87	97.67	92.31
12960	100	100	100	98.81	100	100	100	100	100	100	100	98.41	100	100	98.78	98.65	98.18	98.15	98.51	100	98.7	100	100	100	100	96.88	100	100	100	98.86	98.25	100	97.56	100	100	98.08	100	100	100	94.87	97.62	96.72	94.12	97.22	80.77	93.1	97.87	97.67	92.31
12980	100	100	100	98.81	100	100	100	100	100	100	100	98.41	100	100	98.78	98.65	98.18	98.15	98.51	100	98.7	100	100	100	100	96.88	100	100	100	98.86	98.25	100	97.56	100	100	98.08	100	100	100	94.87	97.62	96.72	94.12	97.22	80.77	93.1	97.87	97.67	92.31
13000	100	100	100	98.81	100	100	100	100	100	100	100	98.41	100	100	98.78	98.65	98.18	98.15	98.51	100	98.7	100	100	100	100	96.88	100	100	100	98.86	98.25	100	97.56	100	100	98.08	100	100	100	94.87	97.62	96.72	94.12	97.22	80.77	93.1	97.87	97.67	92.31
13020	100	100	100	98.81	100	100	100	100	100	100	100	98.41	100	100	98.78	98.65	98.18	98.15	98.51	100	98.7	100	100	100	100	96.88	100	100	100	98.86	98.25	100	97.56	100	100	98.08	100	100	100	94.87	97.62	96.72	94.12	97.22	80.77	93.1	97.87	97.67	92.31
13040	100	100	100	98.81	100	100	100	100	100	100	100	98.41	100	100	98.78	98.65	98.18	98.15	98.51	100	98.7	100	100	100	100	96.88	100	100	100	98.86	98.25	100	97.56	100	100	98.08	100	100	100	94.87	97.62	96.72	94.12	97.22	80.77	93.1	97.87	97.67	92.31
13060	100	100	100	98.81	100	100	100	100	100	100	100	98.41	100	100	98.78	98.65	98.18	98.15	98.51	100	98.7	100	100	100	100	96.88	100	100	100	98.86	98.25	100	97.56	100	100	98.08	100	100	100	94.87	97.62	96.72	94.12	97.22	80.77	93.1	97.87	97.67	92.31
13080	100	100	100	98.81	100	100	100	100	100	100	100	98.41	100	100	98.78	98.65	98.18	98.15	98.51	100	98.7	100	100	100	100	96.88	100	100	100	98.86	98.25	100	97.56	100	100	98.08	100	100	100	94.87	97.62	96.72	94.12	97.22	80.77	93.1	97.87	97.67	92.31
13100	100	100	100	100	100	100	100	100	100	100	100	98.41	100	100	98.78	98.65	98.18	98.15	98.51	100	98.7	100	100	100	100	96.88	100	100	100	98.86	98.25	100	97.56	100	100	98.08	100	100	100	94.87	97.62	96.72	94.12	97.22	84.62	93.1	97.87	97.67	92.31
13120	100	100	100	100	100	100	100	100	100	100	100	98.41	100	100	98.78	98.65	98.18	98.15	98.51	100	98.7	100	100	100	100	96.88	100	100	100	98.86	98.25	100	97.56	100	100	98.08	100	100	100	94.87	97.62	96.72	94.12	97.22	84.62	93.1	97.87	97.67	92.31
13140	100	100	100	100	100	100	100	100	100	100	100	98.41	100	100	98.78	100	98.18	98.15	98.51	100	98.7	100	100	100	100	96.88	100	100	100	100	98.25	100	97.56	100	100	98.08	100	100	100	94.87	97.62	96.72	94.12	97.22	84.62	93.1	97.87	97.67	92.31
13160	100	100	100	100	100	100	100	100	100	100	100	98.41	100	100	98.78	100	98.18	98.15	98.51	100	98.7	100	100	100	100	96.88	100	100	100	100	98.25	100	97.56	100	100	98.08	100	100	100	94.87	97.62	96.72	94.12	97.22	84.62	93.1	97.87	97.67	92.31
13180	100	100	100	100	100	100	100	100	100	100	100	98.41	100	100	98.78	100	98.18	98.15	100	100	98.7	100	100	100	100	96.88	100	100	100	100	98.25	100	97.56	100	100	98.08	100	100	100	94.87	97.62	96.72	94.12	97.22	84.62	93.1	97.87	97.67	92.31
13200	100	100	100	100	100	100	100	100	100	100	100	98.41	100	100	98.78	100	98.18	98.15	100	100	98.7	100	100	100	100	96.88	100	100	100	100	98.25	100	97.56	100	100	98.08	100	100	100	94.87	97.62	96.72	94.12	97.22	84.62	93.1	97.87	97.67	92.31
13220	100	100	100	100	100	100	100	100	100	100	100	98.41	100	100	98.78	100	98.18	98.15	100	100	98.7	100	100	100	100	96.88	100	100	100	100	98.25	100	97.56	100	100	98.08	100	100	100	94.87	97.62	96.72	94.12	97.22	84.62	93.1	97.87	97.67	92.31
13240	100	100	100	100	100	100	100	100	100	100	100	98.41	100	100	98.78	100	98.18	98.15	100	100	98.7	100	100	100	100	96.88	100	100	100	100	98.25	100	97.56	100	100	98.08	100	100	100	94.87	97.62	96.72	94.12	97.22	84.62	93.1	97.87	97.67	92.31
13260	100	100	100	100	100	100	100	100	100	100	100	98.41	100	100	98.78	100	98.18	98.15	100	100	98.7	100	100	100	100	96.88	100	100	100	100	98.25	100	97.56	100	100	98.08	100	100	100	94.87	97.62	96.72	94.12	97.22	84.62	93.1	97.87	97.67	92.31
13280	100	100	100	100	100	100	100	100	100	100	100	98.41	100	100	98.78	100	98.18	98.15	100	100	98.7	100	100	100	100	96.88	100	100	100	100	98.25	100	97.56	100	100	98.08	100	100	100	94.87	97.62	96.72	94.12	97.22	84.62	93.1	97.87	97.67	92.31
13300	100	100	100	100	100	100	100	100	100	100	100	98.41	100	100	98.78	100	98.18	98.15	100	100	98.7	100	100	100	100	96.88	100	100	100	100	98.25	100	97.56	100	100	98.08	100	100	100	94.87	97.62	96.72	94.12	97.22	84.62	93.1	97.87	97.67	92.31
13320	100	100	100	100	100	100	100	100	100	100	100	98.41	100	100	98.78	100	98.18	98.15	100	100	98.7	100	100	100	100	96.88	100	100	100	100	98.25	100	97.56	100	100	98.08	100	100	100	94.87	97.62	96.72	94.12	97.22	84.62	93.1	97.87	97.67	92.31
13340	100	100	100	100	100	100	100	100	100	100	100	98.41	100	100	98.78	100	98.18	98.15	100	100	98.7	100	100	100	100	96.88	100	100	100	100	98.25	100	97.56	100	100	98.08	100	100	100	94.87	97.62	96.72	94.12	97.22	84.62	93.1	97.87	97.67	92.31
13360	100	100	100	100	100	100	100	100	100	100	100	98.41	100	100	98.78	100	98.18	98.15	100	100	98.7	100	100	100	100	96.88	100	100	100	100	98.25	100	97.56	100	100	98.08	100	100	100	94.87	97.62	96.72	94.12	97.22	84.62	93.1	97.87	97.67	92.31
13380	100	100	100	100	100	100	100	100	100	100	100	98.41	100	100	98.78	100	98.18	98.15	100	100	98.7	100	100	100	100	96.88	100	100	100	100	98.25	100	97.56	100	100	98.08	100	100	100	94.87	97.62	96.72	94.12	97.22	84.62	93.1	97.87	97.67	92.31
13400	100	100	100	100	100	100	100	100	100	100	100	98.41	100	100	98.78	100	98.18	98.15	100	100	98.7	100	100	100	100	96.88	100	100	100	100	98.25	100	97.56	100	100	98.08	100	100	100	94.87	97.62	96.72	94.12	97.22	84.62	93.1	97.87	97.67	92.31
13420	100	100	100	100	100	100	100	100	100	100	100	98.41	100	100	98.78	100	98.18	98.15	100	100	98.7	100	100	100	100	96.88	100	100	100	100	98.25	100	97.56	100	100	98.08	100	100	100	94.87	97.62	96.72	94.12	97.22	84.62	93.1	97.87	97.67	92.31
13440	100	100	100	100	100	100	100	100	100	100	100	98.41	100	100	98.78	100	98.18	98.15	100	100	98.7	100	100	100	100	96.88	100	100	100	100	98.25	100	97.56	100	100	98.08	100	100	100	94.87	97.62	96.72	94.12	97.22	84.62	93.1	97.87	97.67	92.31
13460	100	100	100	100	100	100	100	100	100	100	100	98.41	100	100	98.78	100	98.18	98.15	100	100	98.7	100	100	100	100	96.88	100	100	100	100	98.25	100	97.56	100	100	98.08	100	100	100	94.87	97.62	96.72	94.12	97.22	84.62	93.1	97.87	97.67	92.31
13480	100	100	100	100	100	100	100	100	100	100	100	98.41	100	100	98.78	100	98.18	98.15	100	100	98.7	100	100	100	100	96.88	100	100	100	100	98.25	100	97.56	100	100	98.08	100	100	100	94.87	97.62	96.72	94.12	97.22	84.62	93.1	97.87	97.67	92.31
13500	100	100	100	100	100	100	100	100	100	100	100	98.41	100	100	98.78	100	98.18	98.15	100	100	98.7	100	100	100	100	96.88	100	100	100	100	98.25	100	97.56	100	100	98.08	100	100	100	94.87	97.62	96.72	94.12	97.22	84.62	93.1	97.87	97.67	92.31
13520	100	100	100	100	100	100	100	100	100	100	100	98.41	100	100	98.78	100	98.18	98.15	100	100	98.7	100	100	100	100	96.88	100	100	100	100	98.25	100	97.56	100	100	98.08	100	100	100	94.87	97.62	96.72	94.12	97.22	84.62	93.1	97.87	97.67	92.31
13540	100	100	100	100	100	100	100	100	100	100	100	98.41	100	100	98.78	100	98.18	98.15	100	100	98.7	100	100	100	100	96.88	100	100	100	100	98.25	100	97.56	100	100	98.08	100	100	100	94.87	97.62	96.72	94.12	97.22	84.62	93.1	97.87	97.67	92.31
13560	100	100	100	100	100	100	100	100	100	100	100	98.41	100	100	98.78	100	98.18	98.15	100	100	98.7	100	100	100	100	96.88	100	100	100	100	98.25	100	97.56	100	100	98.08	100	100	100	94.87	97.62	96.72	94.12	97.22	88.46	93.1	97.87	97.67	92.31
13580	100	100	100	100	100	100	100	100	100	100	100	98.41	100	100	98.78	100	98.18	98.15	100	100	98.7	100	100	100	100	96.88	100	100	100	100	98.25	100	97.56	100	100	98.08	100	100	100	94.87	97.62	96.72	94.12	97.22	88.46	93.1	97.87	97.67	92.31
13600	100	100	100	100	100	100	100	100	100	100	100	98.41	100	100	98.78	100	98.18	98.15	100	100	98.7	100	100	100	100	96.88	100	100	100	100	98.25	100	97.56	100	100	98.08	100	100	100	94.87	97.62	96.72	94.12	97.22	88.46	93.1	97.87	97.67	92.31
13620	100	100	100	100	100	100	100	100	100	100	100	98.41	100	100	98.78	100	98.18	98.15	100	100	98.7	100	100	100	100	96.88	100	100	100	100	98.25	100	97.56	100	100	98.08	100	100	100	94.87	97.62	96.72	94.12	97.22	88.46	93.1	97.87	97.67	92.31
13640	100	100	100	100	100	100	100	100	100	100	100	98.41	100	100	98.78	100	98.18	98.15	100	100	98.7	100	100	100	100	96.88	100	100	100	100	98.25	100	97.56	100	100	98.08	100	100	100	94.87	97.62	96.72	94.12	97.22	88.46	93.1	97.87	97.67	92.31
13660	100	100	100	100	100	100	100	100	100	100	100	98.41	100	100	98.78	100	98.18	98.15	100	100	98.7	100	100	100	100	96.88	100	100	100	100	98.25	100	97.56	100	100	98.08	100	100	100	94.87	97.62	96.72	94.12	97.22	88.46	93.1	97.87	97.67	92.31
13680	100	100	100	100	100	100	100	100	100	100	100	98.41	100	100	98.78	100	98.18	98.15	100	100	98.7	100	100	100	100	96.88	100	100	100	100	98.25	100	97.56	100	100	98.08	100	100	100	94.87	97.62	96.72	94.12	97.22	88.46	93.1	97.87	97.67	92.31
13700	100	100	100	100	100	100	100	100	100	100	100	98.41	100	100	98.78	100	98.18	98.15	100	100	98.7	100	100	100	100	96.88	100	100	100	100	98.25	100	97.56	100	100	98.08	100	100	100	94.87	97.62	96.72	94.12	97.22	88.46	93.1	97.87	97.67	92.31
13720	100	100	100	100	100	100	100	100	100	100	100	98.41	100	100	98.78	100	98.18	98.15	100	100	98.7	100	100	100	100	96.88	100	100	100	100	98.25	100	97.56	100	100	98.08	100	100	100	94.87	97.62	96.72	94.12	97.22	88.46	93.1	97.87	97.67	92.31
13740	100	100	100	100	100	100	100	100	100	100	100	98.41	100	100	98.78	100	98.18	98.15	100	100	98.7	100	100	100	100	96.88	100	100	100	100	98.25	100	97.56	100	100	98.08	100	100	100	94.87	97.62	96.72	94.12	97.22	88.46	93.1	97.87	97.67	92.31
13760	100	100	100	100	100	100	100	100	100	100	100	98.41	100	100	98.78	100	98.18	98.15	100	100	98.7	100	100	100	100	96.88	100	100	100	100	98.25	100	97.56	100	100	98.08	100	100	100	94.87	97.62	96.72	94.12	97.22	88.46	93.1	97.87	97.67	92.31
13780	100	100	100	100	100	100	100	100	100	100	100	98.41	100	100	98.78	100	98.18	98.15	100	100	98.7	100	100	100	100	96.88	100	100	100	100	98.25	100	97.56	100	100	98.08	100	100	100	94.87	97.62	96.72	94.12	97.22	88.46	93.1	97.87	97.67	92.31
13800	100	100	100	100	100	100	100	100	100	100	100	98.41	100	100	98.78	100	98.18	98.15	100	100	98.7	100	100	100	100	96.88	100	100	100	100	98.25	100	97.56	100	100	98.08	100	100	100	94.87	97.62	96.72	94.12	97.22	88.46	93.1	97.87	97.67	92.31
13820	100	100	100	100	100	100	100	100	100	100	100	98.41	100	100	98.78	100	98.18	98.15	100	100	98.7	100	100	100	100	96.88	100	100	100	100	98.25	100	97.56	100	100	98.08	100	100	100	94.87	97.62	96.72	94.12	97.22	88.46	93.1	97.87	97.67	92.31
13840	100	100	100	100	100	100	100	100	100	100	100	98.41	100	100	98.78	100	98.18	98.15	100	100	98.7	100	100	100	100	96.88	100	100	100	100	98.25	100	97.56	100	100	98.08	100	100	100	94.87	97.62	96.72	94.12	97.22	88.46	93.1	97.87	97.67	92.31
13860	100	100	100	100	100	100	100	100	100	100	100	98.41	100	100	98.78	100	98.18	98.15	100	100	98.7	100	100	100	100	98.44	100	100	100	100	98.25	100	97.56	100	100	98.08	100	100	100	94.87	97.62	96.72	94.12	97.22	88.46	93.1	97.87	97.67	92.31
13880	100	100	100	100	100	100	100	100	100	100	100	98.41	100	100	98.78	100	98.18	98.15	100	100	98.7	100	100	100	100	98.44	100	100	100	100	98.25	100	97.56	100	100	98.08	100	100	100	94.87	97.62	96.72	94.12	97.22	88.46	93.1	97.87	97.67	92.31
13900	100	100	100	100	100	100	100	100	100	100	100	98.41	100	100	98.78	100	98.18	98.15	100	100	100	100	100	100	100	98.44	100	100	100	100	98.25	100	97.56	100	100	98.08	100	100	100	94.87	97.62	96.72	94.12	97.22	88.46	93.1	97.87	97.67	92.31
13920	100	100	100	100	100	100	100	100	100	100	100	98.41	100	100	98.78	100	98.18	98.15	100	100	100	100	100	100	100	98.44	100	100	100	100	98.25	100	97.56	100	100	98.08	100	100	100	94.87	97.62	96.72	94.12	97.22	88.46	93.1	97.87	97.67	92.31
13940	100	100	100	100	100	100	100	100	100	100	100	98.41	100	100	98.78	100	98.18	98.15	100	100	100	100	100	100	100	98.44	100	100	100	100	98.25	100	97.56	100	100	98.08	100	100	100	94.87	97.62	96.72	94.12	97.22	88.46	93.1	97.87	97.67	92.31
13960	100	100	100	100	100	100	100	100	100	100	100	98.41	100	100	98.78	100	98.18	98.15	100	100	100	100	100	100	100	98.44	100	100	100	100	100	100	97.56	100	100	98.08	100	100	100	94.87	97.62	96.72	94.12	97.22	88.46	93.1	97.87	97.67	92.31
13980	100	100	100	100	100	100	100	100	100	100	100	98.41	100	100	98.78	100	98.18	98.15	100	100	100	100	100	100	100	98.44	100	100	100	100	100	100	97.56	100	100	98.08	100	100	100	94.87	97.62	96.72	94.12	97.22	88.46	93.1	97.87	97.67	92.31
14000	100	100	100	100	100	100	100	100	100	100	100	98.41	100	100	98.78	100	98.18	98.15	100	100	100	100	100	100	100	98.44	100	100	100	100	100	100	97.56	100	100	98.08	100	100	100	94.87	97.62	96.72	94.12	97.22	88.46	93.1	97.87	97.67	92.31
14020	100	100	100	100	100	100	100	100	100	100	100	98.41	100	100	98.78	100	98.18	98.15	100	100	100	100	100	100	100	98.44	100	100	100	100	100	100	97.56	100	100	98.08	100	100	100	94.87	97.62	96.72	94.12	97.22	88.46	93.1	97.87	97.67	92.31
14040	100	100	100	100	100	100	100	100	100	100	100	98.41	100	100	98.78	100	98.18	98.15	100	100	100	100	100	100	100	98.44	100	100	100	100	100	100	97.56	100	100	98.08	100	100	100	94.87	97.62	96.72	94.12	97.22	88.46	93.1	97.87	97.67	92.31
14060	100	100	100	100	100	100	100	100	100	100	100	98.41	100	100	98.78	100	98.18	98.15	100	100	100	100	100	100	100	98.44	100	100	100	100	100	100	97.56	100	100	98.08	100	100	100	94.87	97.62	96.72	94.12	97.22	88.46	93.1	97.87	97.67	92.31
14080	100	100	100	100	100	100	100	100	100	100	100	98.41	100	100	98.78	100	98.18	98.15	100	100	100	100	100	100	100	98.44	100	100	100	100	100	100	97.56	100	100	98.08	100	100	100	94.87	97.62	96.72	94.12	97.22	88.46	93.1	97.87	97.67	92.31
14100	100	100	100	100	100	100	100	100	100	100	100	98.41	100	100	98.78	100	98.18	98.15	100	100	100	100	100	100	100	100	100	100	100	100	100	100	97.56	100	100	98.08	100	100	100	94.87	97.62	96.72	94.12	97.22	88.46	93.1	97.87	97.67	92.31
14120	100	100	100	100	100	100	100	100	100	100	100	98.41	100	100	98.78	100	98.18	98.15	100	100	100	100	100	100	100	100	100	100	100	100	100	100	97.56	100	100	98.08	100	100	100	94.87	97.62	96.72	94.12	97.22	88.46	93.1	97.87	97.67	92.31
14140	100	100	100	100	100	100	100	100	100	100	100	98.41	100	100	98.78	100	98.18	98.15	100	100	100	100	100	100	100	100	100	100	100	100	100	100	97.56	100	100	98.08	100	100	100	94.87	97.62	96.72	94.12	97.22	88.46	93.1	97.87	97.67	92.31
14160	100	100	100	100	100	100	100	100	100	100	100	98.41	100	100	98.78	100	98.18	98.15	100	100	100	100	100	100	100	100	100	100	100	100	100	100	97.56	100	100	98.08	100	100	100	94.87	97.62	96.72	94.12	97.22	88.46	93.1	97.87	97.67	92.31
14180	100	100	100	100	100	100	100	100	100	100	100	98.41	100	100	98.78	100	98.18	98.15	100	100	100	100	100	100	100	100	100	100	100	100	100	100	97.56	100	100	98.08	100	100	100	94.87	97.62	96.72	94.12	97.22	88.46	93.1	97.87	97.67	92.31
14200	100	100	100	100	100	100	100	100	100	100	100	98.41	100	100	98.78	100	98.18	98.15	100	100	100	100	100	100	100	100	100	100	100	100	100	100	97.56	100	100	98.08	100	100	100	94.87	97.62	96.72	94.12	97.22	88.46	93.1	97.87	97.67	94.87
14220	100	100	100	100	100	100	100	100	100	100	100	98.41	100	100	98.78	100	98.18	98.15	100	100	100	100	100	100	100	100	100	100	100	100	100	100	97.56	100	100	98.08	100	100	100	94.87	97.62	96.72	94.12	97.22	88.46	93.1	97.87	97.67	94.87
14240	100	100	100	100	100	100	100	100	100	100	100	98.41	100	100	98.78	100	98.18	98.15	100	100	100	100	100	100	100	100	100	100	100	100	100	100	97.56	100	100	98.08	100	100	100	94.87	97.62	96.72	94.12	97.22	88.46	93.1	97.87	97.67	97.44
14260	100	100	100	100	100	100	100	100	100	100	100	98.41	100	100	98.78	100	98.18	98.15	100	100	100	100	100	100	100	100	100	100	100	100	100	100	97.56	100	100	98.08	100	100	100	94.87	97.62	96.72	94.12	97.22	92.31	93.1	97.87	97.67	97.44
14280	100	100	100	100	100	100	100	100	100	100	100	98.41	100	100	98.78	100	98.18	98.15	100	100	100	100	100	100	100	100	100	100	100	100	100	100	97.56	100	100	98.08	100	100	100	94.87	97.62	96.72	94.12	97.22	92.31	93.1	97.87	97.67	97.44
14300	100	100	100	100	100	100	100	100	100	100	100	98.41	100	100	98.78	100	98.18	98.15	100	100	100	100	100	100	100	100	100	100	100	100	100	100	97.56	100	100	98.08	100	100	100	94.87	97.62	96.72	94.12	97.22	92.31	93.1	97.87	97.67	97.44
14320	100	100	100	100	100	100	100	100	100	100	100	98.41	100	100	98.78	100	98.18	98.15	100	100	100	100	100	100	100	100	100	100	100	100	100	100	97.56	100	100	98.08	100	100	100	94.87	97.62	96.72	94.12	97.22	92.31	93.1	97.87	97.67	97.44
14340	100	100	100	100	100	100	100	100	100	100	100	98.41	100	100	98.78	100	98.18	98.15	100	100	100	100	100	100	100	100	100	100	100	100	100	100	97.56	100	100	98.08	100	100	100	94.87	97.62	96.72	94.12	97.22	92.31	93.1	97.87	97.67	97.44
14360	100	100	100	100	100	100	100	100	100	100	100	98.41	100	100	98.78	100	98.18	98.15	100	100	100	100	100	100	100	100	100	100	100	100	100	100	97.56	100	100	98.08	100	100	100	94.87	97.62	96.72	94.12	97.22	92.31	96.55	97.87	97.67	97.44
14380	100	100	100	100	100	100	100	100	100	100	100	98.41	100	100	98.78	100	98.18	98.15	100	100	100	100	100	100	100	100	100	100	100	100	100	100	98.78	100	100	98.08	100	100	100	94.87	97.62	96.72	94.12	97.22	92.31	96.55	97.87	97.67	97.44
14400	100	100	100	100	100	100	100	100	100	100	100	98.41	100	100	98.78	100	98.18	98.15	100	100	100	100	100	100	100	100	100	100	100	100	100	100	98.78	100	100	98.08	100	100	100	94.87	97.62	96.72	94.12	97.22	92.31	96.55	97.87	97.67	97.44
14420	100	100	100	100	100	100	100	100	100	100	100	98.41	100	100	98.78	100	98.18	98.15	100	100	100	100	100	100	100	100	100	100	100	100	100	100	98.78	100	100	98.08	100	100	100	94.87	97.62	96.72	94.12	97.22	92.31	96.55	97.87	97.67	97.44
14440	100	100	100	100	100	100	100	100	100	100	100	98.41	100	100	98.78	100	98.18	98.15	100	100	100	100	100	100	100	100	100	100	100	100	100	100	98.78	100	100	98.08	100	100	100	94.87	97.62	96.72	94.12	97.22	92.31	96.55	97.87	97.67	97.44
14460	100	100	100	100	100	100	100	100	100	100	100	98.41	100	100	98.78	100	98.18	98.15	100	100	100	100	100	100	100	100	100	100	100	100	100	100	98.78	100	100	98.08	100	100	100	94.87	97.62	96.72	94.12	97.22	92.31	96.55	97.87	97.67	97.44
14480	100	100	100	100	100	100	100	100	100	100	100	98.41	100	100	98.78	100	98.18	98.15	100	100	100	100	100	100	100	100	100	100	100	100	100	100	98.78	100	100	98.08	100	100	100	94.87	97.62	96.72	94.12	97.22	92.31	96.55	97.87	97.67	97.44
14500	100	100	100	100	100	100	100	100	100	100	100	98.41	100	100	98.78	100	98.18	98.15	100	100	100	100	100	100	100	100	100	100	100	100	100	100	98.78	100	100	98.08	100	100	100	94.87	97.62	96.72	94.12	97.22	92.31	96.55	97.87	97.67	97.44
14520	100	100	100	100	100	100	100	100	100	100	100	98.41	100	100	98.78	100	98.18	98.15	100	100	100	100	100	100	100	100	100	100	100	100	100	100	98.78	100	100	98.08	100	100	100	94.87	97.62	96.72	94.12	97.22	92.31	96.55	97.87	97.67	97.44
14540	100	100	100	100	100	100	100	100	100	100	100	98.41	100	100	98.78	100	98.18	98.15	100	100	100	100	100	100	100	100	100	100	100	100	100	100	98.78	100	100	98.08	100	100	100	94.87	97.62	96.72	94.12	97.22	92.31	96.55	97.87	97.67	97.44
14560	100	100	100	100	100	100	100	100	100	100	100	98.41	100	100	98.78	100	98.18	98.15	100	100	100	100	100	100	100	100	100	100	100	100	100	100	98.78	100	100	98.08	100	100	100	94.87	97.62	96.72	94.12	97.22	92.31	96.55	97.87	97.67	97.44
14580	100	100	100	100	100	100	100	100	100	100	100	98.41	100	100	98.78	100	98.18	98.15	100	100	100	100	100	100	100	100	100	100	100	100	100	100	98.78	100	100	98.08	100	100	100	94.87	97.62	96.72	94.12	97.22	92.31	96.55	97.87	97.67	97.44
14600	100	100	100	100	100	100	100	100	100	100	100	98.41	100	100	98.78	100	98.18	98.15	100	100	100	100	100	100	100	100	100	100	100	100	100	100	98.78	100	100	98.08	100	100	100	94.87	97.62	96.72	94.12	97.22	92.31	96.55	97.87	97.67	97.44
14620	100	100	100	100	100	100	100	100	100	100	100	98.41	100	100	98.78	100	98.18	98.15	100	100	100	100	100	100	100	100	100	100	100	100	100	100	98.78	100	100	98.08	100	100	100	94.87	97.62	96.72	94.12	97.22	92.31	96.55	97.87	97.67	97.44
14640	100	100	100	100	100	100	100	100	100	100	100	98.41	100	100	98.78	100	98.18	98.15	100	100	100	100	100	100	100	100	100	100	100	100	100	100	98.78	100	100	98.08	100	100	100	94.87	97.62	96.72	94.12	97.22	92.31	96.55	97.87	97.67	97.44
14660	100	100	100	100	100	100	100	100	100	100	100	98.41	100	100	98.78	100	98.18	98.15	100	100	100	100	100	100	100	100	100	100	100	100	100	100	98.78	100	100	98.08	100	100	100	94.87	97.62	96.72	94.12	97.22	92.31	96.55	97.87	97.67	97.44
14680	100	100	100	100	100	100	100	100	100	100	100	98.41	100	100	98.78	100	98.18	98.15	100	100	100	100	100	100	100	100	100	100	100	100	100	100	98.78	100	100	98.08	100	100	100	94.87	97.62	96.72	94.12	97.22	92.31	96.55	97.87	97.67	97.44
14700	100	100	100	100	100	100	100	100	100	100	100	98.41	100	100	98.78	100	98.18	98.15	100	100	100	100	100	100	100	100	100	100	100	100	100	100	98.78	100	100	98.08	100	100	100	94.87	97.62	96.72	94.12	97.22	92.31	96.55	97.87	97.67	97.44
14720	100	100	100	100	100	100	100	100	100	100	100	98.41	100	100	98.78	100	98.18	98.15	100	100	100	100	100	100	100	100	100	100	100	100	100	100	98.78	100	100	98.08	100	100	100	94.87	97.62	96.72	94.12	97.22	92.31	96.55	97.87	97.67	97.44
14740	100	100	100	100	100	100	100	100	100	100	100	98.41	100	100	98.78	100	98.18	98.15	100	100	100	100	100	100	100	100	100	100	100	100	100	100	98.78	100	100	98.08	100	100	100	94.87	97.62	96.72	94.12	97.22	92.31	96.55	97.87	97.67	97.44
14760	100	100	100	100	100	100	100	100	100	100	100	98.41	100	100	98.78	100	98.18	98.15	100	100	100	100	100	100	100	100	100	100	100	100	100	100	98.78	100	100	98.08	100	100	100	94.87	97.62	96.72	94.12	97.22	92.31	96.55	97.87	97.67	97.44
14780	100	100	100	100	100	100	100	100	100	100	100	98.41	100	100	98.78	100	98.18	98.15	100	100	100	100	100	100	100	100	100	100	100	100	100	100	98.78	100	100	98.08	100	100	100	94.87	97.62	96.72	94.12	97.22	92.31	96.55	97.87	97.67	97.44
14800	100	100	100	100	100	100	100	100	100	100	100	98.41	100	100	98.78	100	98.18	98.15	100	100	100	100	100	100	100	100	100	100	100	100	100	100	98.78	100	100	98.08	100	100	100	94.87	97.62	96.72	94.12	97.22	92.31	96.55	97.87	97.67	97.44
14820	100	100	100	100	100	100	100	100	100	100	100	98.41	100	100	98.78	100	98.18	98.15	100	100	100	100	100	100	100	100	100	100	100	100	100	100	98.78	100	100	98.08	100	100	100	94.87	97.62	96.72	94.12	97.22	92.31	96.55	97.87	97.67	97.44
14840	100	100	100	100	100	100	100	100	100	100	100	98.41	100	100	98.78	100	98.18	98.15	100	100	100	100	100	100	100	100	100	100	100	100	100	100	98.78	100	100	98.08	100	100	100	94.87	97.62	96.72	94.12	97.22	92.31	96.55	97.87	97.67	97.44
14860	100	100	100	100	100	100	100	100	100	100	100	98.41	100	100	98.78	100	100	98.15	100	100	100	100	100	100	100	100	100	100	100	100	100	100	98.78	100	100	98.08	100	100	100	94.87	97.62	96.72	94.12	97.22	92.31	96.55	97.87	97.67	97.44
14880	100	100	100	100	100	100	100	100	100	100	100	98.41	100	100	98.78	100	100	98.15	100	100	100	100	100	100	100	100	100	100	100	100	100	100	98.78	100	100	98.08	100	100	100	94.87	97.62	96.72	94.12	97.22	92.31	96.55	97.87	97.67	97.44
14900	100	100	100	100	100	100	100	100	100	100	100	98.41	100	100	98.78	100	100	98.15	100	100	100	100	100	100	100	100	100	100	100	100	100	100	98.78	100	100	98.08	100	100	100	94.87	97.62	96.72	94.12	97.22	92.31	96.55	97.87	97.67	97.44
14920	100	100	100	100	100	100	100	100	100	100	100	98.41	100	100	98.78	100	100	98.15	100	100	100	100	100	100	100	100	100	100	100	100	100	100	98.78	100	100	98.08	100	100	100	94.87	97.62	96.72	94.12	97.22	92.31	96.55	97.87	97.67	97.44
14940	100	100	100	100	100	100	100	100	100	100	100	98.41	100	100	98.78	100	100	98.15	100	100	100	100	100	100	100	100	100	100	100	100	100	100	98.78	100	100	98.08	100	100	100	94.87	97.62	96.72	94.12	97.22	92.31	96.55	97.87	97.67	97.44
14960	100	100	100	100	100	100	100	100	100	100	100	98.41	100	100	98.78	100	100	98.15	100	100	100	100	100	100	100	100	100	100	100	100	100	100	98.78	100	100	98.08	100	100	100	94.87	97.62	96.72	94.12	97.22	92.31	96.55	97.87	97.67	97.44
14980	100	100	100	100	100	100	100	100	100	100	100	98.41	100	100	98.78	100	100	98.15	100	100	100	100	100	100	100	100	100	100	100	100	100	100	98.78	100	100	98.08	100	100	100	94.87	97.62	96.72	94.12	97.22	92.31	96.55	97.87	97.67	97.44
15000	100	100	100	100	100	100	100	100	100	100	100	98.41	100	100	98.78	100	100	98.15	100	100	100	100	100	100	100	100	100	100	100	100	100	100	98.78	100	100	98.08	100	100	100	94.87	97.62	96.72	94.12	97.22	92.31	96.55	97.87	97.67	97.44
15020	100	100	100	100	100	100	100	100	100	100	100	98.41	100	100	98.78	100	100	98.15	100	100	100	100	100	100	100	100	100	100	100	100	100	100	98.78	100	100	98.08	100	100	100	94.87	97.62	96.72	94.12	97.22	92.31	96.55	100	97.67	100
15040	100	100	100	100	100	100	100	100	100	100	100	98.41	100	100	98.78	100	100	98.15	100	100	100	100	100	100	100	100	100	100	100	100	100	100	98.78	100	100	98.08	100	100	100	94.87	97.62	96.72	94.12	97.22	92.31	96.55	100	97.67	100
15060	100	100	100	100	100	100	100	100	100	100	100	98.41	100	100	98.78	100	100	98.15	100	100	100	100	100	100	100	100	100	100	100	100	100	100	98.78	100	100	98.08	100	100	100	94.87	97.62	96.72	94.12	97.22	92.31	96.55	100	97.67	100
15080	100	100	100	100	100	100	100	100	100	100	100	98.41	100	100	98.78	100	100	98.15	100	100	100	100	100	100	100	100	100	100	100	100	100	100	98.78	100	100	98.08	100	100	100	94.87	97.62	96.72	94.12	97.22	92.31	96.55	100	97.67	100
15100	100	100	100	100	100	100	100	100	100	100	100	98.41	100	100	98.78	100	100	98.15	100	100	100	100	100	100	100	100	100	100	100	100	100	100	98.78	100	100	98.08	100	100	100	94.87	97.62	96.72	94.12	97.22	92.31	96.55	100	97.67	100
15120	100	100	100	100	100	100	100	100	100	100	100	98.41	100	100	98.78	100	100	98.15	100	100	100	100	100	100	100	100	100	100	100	100	100	100	98.78	100	100	98.08	100	100	100	94.87	97.62	96.72	94.12	97.22	92.31	96.55	100	97.67	100
15140	100	100	100	100	100	100	100	100	100	100	100	98.41	100	100	98.78	100	100	98.15	100	100	100	100	100	100	100	100	100	100	100	100	100	100	98.78	100	100	98.08	100	100	100	94.87	97.62	96.72	94.12	97.22	92.31	96.55	100	97.67	100
15160	100	100	100	100	100	100	100	100	100	100	100	98.41	100	100	98.78	100	100	98.15	100	100	100	100	100	100	100	100	100	100	100	100	100	100	98.78	100	100	98.08	100	100	100	94.87	97.62	96.72	94.12	97.22	92.31	96.55	100	97.67	100
15180	100	100	100	100	100	100	100	100	100	100	100	98.41	100	100	98.78	100	100	98.15	100	100	100	100	100	100	100	100	100	100	100	100	100	100	98.78	100	100	98.08	100	100	100	94.87	97.62	96.72	94.12	97.22	92.31	96.55	100	97.67	100
15200	100	100	100	100	100	100	100	100	100	100	100	98.41	100	100	98.78	100	100	98.15	100	100	100	100	100	100	100	100	100	100	100	100	100	100	98.78	100	100	98.08	100	100	100	94.87	97.62	96.72	94.12	97.22	92.31	96.55	100	97.67	100
15220	100	100	100	100	100	100	100	100	100	100	100	98.41	100	100	98.78	100	100	98.15	100	100	100	100	100	100	100	100	100	100	100	100	100	100	98.78	100	100	98.08	100	100	100	94.87	97.62	96.72	94.12	97.22	92.31	96.55	100	100	100
15240	100	100	100	100	100	100	100	100	100	100	100	98.41	100	100	98.78	100	100	98.15	100	100	100	100	100	100	100	100	100	100	100	100	100	100	98.78	100	100	98.08	100	100	100	94.87	97.62	96.72	94.12	97.22	92.31	96.55	100	100	100
15260	100	100	100	100	100	100	100	100	100	100	100	98.41	100	100	98.78	100	100	98.15	100	100	100	100	100	100	100	100	100	100	100	100	100	100	98.78	100	100	98.08	100	100	100	94.87	97.62	96.72	94.12	97.22	92.31	96.55	100	100	100
15280	100	100	100	100	100	100	100	100	100	100	100	98.41	100	100	98.78	100	100	98.15	100	100	100	100	100	100	100	100	100	100	100	100	100	100	98.78	100	100	98.08	100	100	100	94.87	97.62	96.72	94.12	97.22	92.31	96.55	100	100	100
15300	100	100	100	100	100	100	100	100	100	100	100	98.41	100	100	98.78	100	100	98.15	100	100	100	100	100	100	100	100	100	100	100	100	100	100	98.78	100	100	100	100	100	100	94.87	97.62	96.72	94.12	97.22	92.31	96.55	100	100	100
15320	100	100	100	100	100	100	100	100	100	100	100	98.41	100	100	98.78	100	100	98.15	100	100	100	100	100	100	100	100	100	100	100	100	100	100	98.78	100	100	100	100	100	100	94.87	97.62	96.72	97.06	97.22	92.31	96.55	100	100	100
15340	100	100	100	100	100	100	100	100	100	100	100	98.41	100	100	98.78	100	100	98.15	100	100	100	100	100	100	100	100	100	100	100	100	100	100	98.78	100	100	100	100	100	100	94.87	100	96.72	97.06	97.22	92.31	96.55	100	100	100
15360	100	100	100	100	100	100	100	100	100	100	100	98.41	100	100	98.78	100	100	98.15	100	100	100	100	100	100	100	100	100	100	100	100	100	100	98.78	100	100	100	100	100	100	94.87	100	96.72	97.06	97.22	92.31	96.55	100	100	100
15380	100	100	100	100	100	100	100	100	100	100	100	98.41	100	100	98.78	100	100	98.15	100	100	100	100	100	100	100	100	100	100	100	100	100	100	98.78	100	100	100	100	100	100	94.87	100	96.72	97.06	97.22	92.31	96.55	100	100	100
15400	100	100	100	100	100	100	100	100	100	100	100	98.41	100	100	98.78	100	100	98.15	100	100	100	100	100	100	100	100	100	100	100	100	100	100	98.78	100	100	100	100	100	100	94.87	100	96.72	97.06	97.22	92.31	96.55	100	100	100
15420	100	100	100	100	100	100	100	100	100	100	100	98.41	100	100	98.78	100	100	98.15	100	100	100	100	100	100	100	100	100	100	100	100	100	100	98.78	100	100	100	100	100	100	94.87	100	96.72	97.06	97.22	92.31	96.55	100	100	100
15440	100	100	100	100	100	100	100	100	100	100	100	98.41	100	100	98.78	100	100	98.15	100	100	100	100	100	100	100	100	100	100	100	100	100	100	98.78	100	100	100	100	100	100	94.87	100	96.72	97.06	97.22	92.31	96.55	100	100	100
15460	100	100	100	100	100	100	100	100	100	100	100	98.41	100	100	98.78	100	100	98.15	100	100	100	100	100	100	100	100	100	100	100	100	100	100	98.78	100	100	100	100	100	100	94.87	100	96.72	97.06	97.22	92.31	96.55	100	100	100
15480	100	100	100	100	100	100	100	100	100	100	100	98.41	100	100	98.78	100	100	98.15	100	100	100	100	100	100	100	100	100	100	100	100	100	100	98.78	100	100	100	100	100	100	97.44	100	96.72	97.06	97.22	92.31	96.55	100	100	100
15500	100	100	100	100	100	100	100	100	100	100	100	98.41	100	100	98.78	100	100	98.15	100	100	100	100	100	100	100	100	100	100	100	100	100	100	98.78	100	100	100	100	100	100	97.44	100	96.72	97.06	97.22	92.31	96.55	100	100	100
15520	100	100	100	100	100	100	100	100	100	100	100	98.41	100	100	98.78	100	100	98.15	100	100	100	100	100	100	100	100	100	100	100	100	100	100	98.78	100	100	100	100	100	100	97.44	100	96.72	97.06	97.22	92.31	96.55	100	100	100
15540	100	100	100	100	100	100	100	100	100	100	100	98.41	100	100	98.78	100	100	98.15	100	100	100	100	100	100	100	100	100	100	100	100	100	100	98.78	100	100	100	100	100	100	97.44	100	98.36	97.06	97.22	92.31	96.55	100	100	100
15560	100	100	100	100	100	100	100	100	100	100	100	98.41	100	100	98.78	100	100	98.15	100	100	100	100	100	100	100	100	100	100	100	100	100	100	98.78	100	100	100	100	100	100	97.44	100	98.36	97.06	97.22	92.31	96.55	100	100	100
15580	100	100	100	100	100	100	100	100	100	100	100	98.41	100	100	98.78	100	100	98.15	100	100	100	100	100	100	100	100	100	100	100	100	100	100	98.78	100	100	100	100	100	100	97.44	100	98.36	97.06	97.22	92.31	96.55	100	100	100
15600	100	100	100	100	100	100	100	100	100	100	100	98.41	100	100	98.78	100	100	98.15	100	100	100	100	100	100	100	100	100	100	100	100	100	100	98.78	100	100	100	100	100	100	97.44	100	98.36	97.06	97.22	92.31	96.55	100	100	100
15620	100	100	100	100	100	100	100	100	100	100	100	98.41	100	100	98.78	100	100	98.15	100	100	100	100	100	100	100	100	100	100	100	100	100	100	98.78	100	100	100	100	100	100	97.44	100	98.36	97.06	97.22	92.31	96.55	100	100	100
15640	100	100	100	100	100	100	100	100	100	100	100	98.41	100	100	98.78	100	100	98.15	100	100	100	100	100	100	100	100	100	100	100	100	100	100	98.78	100	100	100	100	100	100	97.44	100	98.36	97.06	97.22	92.31	96.55	100	100	100
15660	100	100	100	100	100	100	100	100	100	100	100	98.41	100	100	98.78	100	100	98.15	100	100	100	100	100	100	100	100	100	100	100	100	100	100	98.78	100	100	100	100	100	100	97.44	100	98.36	97.06	97.22	92.31	96.55	100	100	100
15680	100	100	100	100	100	100	100	100	100	100	100	98.41	100	100	98.78	100	100	98.15	100	100	100	100	100	100	100	100	100	100	100	100	100	100	98.78	100	100	100	100	100	100	97.44	100	98.36	97.06	97.22	92.31	96.55	100	100	100
15700	100	100	100	100	100	100	100	100	100	100	100	98.41	100	100	98.78	100	100	98.15	100	100	100	100	100	100	100	100	100	100	100	100	100	100	98.78	100	100	100	100	100	100	97.44	100	98.36	97.06	97.22	92.31	96.55	100	100	100
15720	100	100	100	100	100	100	100	100	100	100	100	98.41	100	100	98.78	100	100	98.15	100	100	100	100	100	100	100	100	100	100	100	100	100	100	98.78	100	100	100	100	100	100	97.44	100	98.36	97.06	97.22	92.31	96.55	100	100	100
15740	100	100	100	100	100	100	100	100	100	100	100	98.41	100	100	98.78	100	100	98.15	100	100	100	100	100	100	100	100	100	100	100	100	100	100	98.78	100	100	100	100	100	100	97.44	100	98.36	97.06	97.22	92.31	96.55	100	100	100
15760	100	100	100	100	100	100	100	100	100	100	100	98.41	100	100	98.78	100	100	98.15	100	100	100	100	100	100	100	100	100	100	100	100	100	100	98.78	100	100	100	100	100	100	97.44	100	98.36	97.06	97.22	92.31	96.55	100	100	100
15780	100	100	100	100	100	100	100	100	100	100	100	98.41	100	100	98.78	100	100	98.15	100	100	100	100	100	100	100	100	100	100	100	100	100	100	98.78	100	100	100	100	100	100	97.44	100	100	97.06	97.22	92.31	96.55	100	100	100
15800	100	100	100	100	100	100	100	100	100	100	100	98.41	100	100	98.78	100	100	98.15	100	100	100	100	100	100	100	100	100	100	100	100	100	100	98.78	100	100	100	100	100	100	97.44	100	100	97.06	97.22	92.31	96.55	100	100	100
15820	100	100	100	100	100	100	100	100	100	100	100	98.41	100	100	98.78	100	100	98.15	100	100	100	100	100	100	100	100	100	100	100	100	100	100	98.78	100	100	100	100	100	100	97.44	100	100	97.06	97.22	92.31	96.55	100	100	100
15840	100	100	100	100	100	100	100	100	100	100	100	98.41	100	100	100	100	100	98.15	100	100	100	100	100	100	100	100	100	100	100	100	100	100	98.78	100	100	100	100	100	100	97.44	100	100	97.06	97.22	92.31	96.55	100	100	100
15860	100	100	100	100	100	100	100	100	100	100	100	98.41	100	100	100	100	100	98.15	100	100	100	100	100	100	100	100	100	100	100	100	100	100	98.78	100	100	100	100	100	100	97.44	100	100	97.06	97.22	92.31	96.55	100	100	100
15880	100	100	100	100	100	100	100	100	100	100	100	98.41	100	100	100	100	100	98.15	100	100	100	100	100	100	100	100	100	100	100	100	100	100	98.78	100	100	100	100	100	100	97.44	100	100	97.06	97.22	92.31	96.55	100	100	100
15900	100	100	100	100	100	100	100	100	100	100	100	98.41	100	100	100	100	100	98.15	100	100	100	100	100	100	100	100	100	100	100	100	100	100	98.78	100	100	100	100	100	100	97.44	100	100	97.06	97.22	92.31	96.55	100	100	100
15920	100	100	100	100	100	100	100	100	100	100	100	98.41	100	100	100	100	100	98.15	100	100	100	100	100	100	100	100	100	100	100	100	100	100	98.78	100	100	100	100	100	100	97.44	100	100	97.06	97.22	92.31	96.55	100	100	100
15940	100	100	100	100	100	100	100	100	100	100	100	98.41	100	100	100	100	100	98.15	100	100	100	100	100	100	100	100	100	100	100	100	100	100	98.78	100	100	100	100	100	100	97.44	100	100	97.06	97.22	92.31	96.55	100	100	100
15960	100	100	100	100	100	100	100	100	100	100	100	98.41	100	100	100	100	100	98.15	100	100	100	100	100	100	100	100	100	100	100	100	100	100	98.78	100	100	100	100	100	100	97.44	100	100	97.06	97.22	92.31	96.55	100	100	100
15980	100	100	100	100	100	100	100	100	100	100	100	98.41	100	100	100	100	100	98.15	100	100	100	100	100	100	100	100	100	100	100	100	100	100	98.78	100	100	100	100	100	100	97.44	100	100	97.06	97.22	92.31	96.55	100	100	100
16000	100	100	100	100	100	100	100	100	100	100	100	98.41	100	100	100	100	100	98.15	100	100	100	100	100	100	100	100	100	100	100	100	100	100	98.78	100	100	100	100	100	100	100	100	100	97.06	97.22	92.31	96.55	100	100	100
16020	100	100	100	100	100	100	100	100	100	100	100	98.41	100	100	100	100	100	98.15	100	100	100	100	100	100	100	100	100	100	100	100	100	100	98.78	100	100	100	100	100	100	100	100	100	97.06	97.22	92.31	96.55	100	100	100
16040	100	100	100	100	100	100	100	100	100	100	100	98.41	100	100	100	100	100	98.15	100	100	100	100	100	100	100	100	100	100	100	100	100	100	98.78	100	100	100	100	100	100	100	100	100	97.06	97.22	92.31	96.55	100	100	100
16060	100	100	100	100	100	100	100	100	100	100	100	98.41	100	100	100	100	100	98.15	100	100	100	100	100	100	100	100	100	100	100	100	100	100	98.78	100	100	100	100	100	100	100	100	100	97.06	97.22	92.31	96.55	100	100	100
16080	100	100	100	100	100	100	100	100	100	100	100	98.41	100	100	100	100	100	98.15	100	100	100	100	100	100	100	100	100	100	100	100	100	100	98.78	100	100	100	100	100	100	100	100	100	97.06	97.22	92.31	96.55	100	100	100
16100	100	100	100	100	100	100	100	100	100	100	100	98.41	100	100	100	100	100	98.15	100	100	100	100	100	100	100	100	100	100	100	100	100	100	98.78	100	100	100	100	100	100	100	100	100	97.06	97.22	92.31	96.55	100	100	100
16120	100	100	100	100	100	100	100	100	100	100	100	98.41	100	100	100	100	100	98.15	100	100	100	100	100	100	100	100	100	100	100	100	100	100	98.78	100	100	100	100	100	100	100	100	100	97.06	97.22	92.31	96.55	100	100	100
16140	100	100	100	100	100	100	100	100	100	100	100	98.41	100	100	100	100	100	98.15	100	100	100	100	100	100	100	100	100	100	100	100	100	100	98.78	100	100	100	100	100	100	100	100	100	97.06	97.22	92.31	96.55	100	100	100
16160	100	100	100	100	100	100	100	100	100	100	100	98.41	100	100	100	100	100	98.15	100	100	100	100	100	100	100	100	100	100	100	100	100	100	98.78	100	100	100	100	100	100	100	100	100	97.06	97.22	92.31	96.55	100	100	100
16180	100	100	100	100	100	100	100	100	100	100	100	98.41	100	100	100	100	100	98.15	100	100	100	100	100	100	100	100	100	100	100	100	100	100	98.78	100	100	100	100	100	100	100	100	100	97.06	97.22	92.31	96.55	100	100	100
16200	100	100	100	100	100	100	100	100	100	100	100	98.41	100	100	100	100	100	98.15	100	100	100	100	100	100	100	100	100	100	100	100	100	100	98.78	100	100	100	100	100	100	100	100	100	97.06	97.22	92.31	96.55	100	100	100
16220	100	100	100	100	100	100	100	100	100	100	100	98.41	100	100	100	100	100	98.15	100	100	100	100	100	100	100	100	100	100	100	100	100	100	98.78	100	100	100	100	100	100	100	100	100	97.06	97.22	92.31	96.55	100	100	100
16240	100	100	100	100	100	100	100	100	100	100	100	98.41	100	100	100	100	100	98.15	100	100	100	100	100	100	100	100	100	100	100	100	100	100	98.78	100	100	100	100	100	100	100	100	100	97.06	97.22	92.31	96.55	100	100	100
16260	100	100	100	100	100	100	100	100	100	100	100	98.41	100	100	100	100	100	98.15	100	100	100	100	100	100	100	100	100	100	100	100	100	100	98.78	100	100	100	100	100	100	100	100	100	97.06	97.22	92.31	96.55	100	100	100
16280	100	100	100	100	100	100	100	100	100	100	100	98.41	100	100	100	100	100	98.15	100	100	100	100	100	100	100	100	100	100	100	100	100	100	98.78	100	100	100	100	100	100	100	100	100	97.06	97.22	92.31	96.55	100	100	100
16300	100	100	100	100	100	100	100	100	100	100	100	98.41	100	100	100	100	100	98.15	100	100	100	100	100	100	100	100	100	100	100	100	100	100	98.78	100	100	100	100	100	100	100	100	100	97.06	97.22	92.31	96.55	100	100	100
16320	100	100	100	100	100	100	100	100	100	100	100	98.41	100	100	100	100	100	98.15	100	100	100	100	100	100	100	100	100	100	100	100	100	100	98.78	100	100	100	100	100	100	100	100	100	97.06	97.22	92.31	96.55	100	100	100
16340	100	100	100	100	100	100	100	100	100	100	100	98.41	100	100	100	100	100	98.15	100	100	100	100	100	100	100	100	100	100	100	100	100	100	98.78	100	100	100	100	100	100	100	100	100	97.06	97.22	92.31	96.55	100	100	100
16360	100	100	100	100	100	100	100	100	100	100	100	98.41	100	100	100	100	100	98.15	100	100	100	100	100	100	100	100	100	100	100	100	100	100	98.78	100	100	100	100	100	100	100	100	100	97.06	97.22	92.31	96.55	100	100	100
16380	100	100	100	100	100	100	100	100	100	100	100	98.41	100	100	100	100	100	98.15	100	100	100	100	100	100	100	100	100	100	100	100	100	100	98.78	100	100	100	100	100	100	100	100	100	97.06	97.22	92.31	96.55	100	100	100
16400	100	100	100	100	100	100	100	100	100	100	100	98.41	100	100	100	100	100	98.15	100	100	100	100	100	100	100	100	100	100	100	100	100	100	98.78	100	100	100	100	100	100	100	100	100	97.06	97.22	92.31	96.55	100	100	100
16420	100	100	100	100	100	100	100	100	100	100	100	98.41	100	100	100	100	100	98.15	100	100	100	100	100	100	100	100	100	100	100	100	100	100	98.78	100	100	100	100	100	100	100	100	100	97.06	97.22	92.31	96.55	100	100	100
16440	100	100	100	100	100	100	100	100	100	100	100	98.41	100	100	100	100	100	98.15	100	100	100	100	100	100	100	100	100	100	100	100	100	100	98.78	100	100	100	100	100	100	100	100	100	97.06	97.22	92.31	96.55	100	100	100
16460	100	100	100	100	100	100	100	100	100	100	100	98.41	100	100	100	100	100	98.15	100	100	100	100	100	100	100	100	100	100	100	100	100	100	98.78	100	100	100	100	100	100	100	100	100	97.06	97.22	92.31	96.55	100	100	100
16480	100	100	100	100	100	100	100	100	100	100	100	98.41	100	100	100	100	100	98.15	100	100	100	100	100	100	100	100	100	100	100	100	100	100	98.78	100	100	100	100	100	100	100	100	100	97.06	97.22	92.31	96.55	100	100	100
16500	100	100	100	100	100	100	100	100	100	100	100	98.41	100	100	100	100	100	98.15	100	100	100	100	100	100	100	100	100	100	100	100	100	100	98.78	100	100	100	100	100	100	100	100	100	97.06	97.22	92.31	96.55	100	100	100
16520	100	100	100	100	100	100	100	100	100	100	100	98.41	100	100	100	100	100	98.15	100	100	100	100	100	100	100	100	100	100	100	100	100	100	98.78	100	100	100	100	100	100	100	100	100	97.06	97.22	92.31	96.55	100	100	100
16540	100	100	100	100	100	100	100	100	100	100	100	98.41	100	100	100	100	100	98.15	100	100	100	100	100	100	100	100	100	100	100	100	100	100	98.78	100	100	100	100	100	100	100	100	100	97.06	97.22	92.31	96.55	100	100	100
16560	100	100	100	100	100	100	100	100	100	100	100	98.41	100	100	100	100	100	98.15	100	100	100	100	100	100	100	100	100	100	100	100	100	100	98.78	100	100	100	100	100	100	100	100	100	97.06	97.22	92.31	96.55	100	100	100
16580	100	100	100	100	100	100	100	100	100	100	100	98.41	100	100	100	100	100	98.15	100	100	100	100	100	100	100	100	100	100	100	100	100	100	98.78	100	100	100	100	100	100	100	100	100	97.06	97.22	92.31	96.55	100	100	100
16600	100	100	100	100	100	100	100	100	100	100	100	98.41	100	100	100	100	100	98.15	100	100	100	100	100	100	100	100	100	100	100	100	100	100	98.78	100	100	100	100	100	100	100	100	100	97.06	97.22	92.31	96.55	100	100	100
16620	100	100	100	100	100	100	100	100	100	100	100	98.41	100	100	100	100	100	98.15	100	100	100	100	100	100	100	100	100	100	100	100	100	100	100	100	100	100	100	100	100	100	100	100	97.06	97.22	92.31	96.55	100	100	100
16640	100	100	100	100	100	100	100	100	100	100	100	98.41	100	100	100	100	100	98.15	100	100	100	100	100	100	100	100	100	100	100	100	100	100	100	100	100	100	100	100	100	100	100	100	97.06	97.22	92.31	96.55	100	100	100
16660	100	100	100	100	100	100	100	100	100	100	100	98.41	100	100	100	100	100	98.15	100	100	100	100	100	100	100	100	100	100	100	100	100	100	100	100	100	100	100	100	100	100	100	100	97.06	97.22	92.31	96.55	100	100	100
16680	100	100	100	100	100	100	100	100	100	100	100	98.41	100	100	100	100	100	98.15	100	100	100	100	100	100	100	100	100	100	100	100	100	100	100	100	100	100	100	100	100	100	100	100	97.06	97.22	92.31	96.55	100	100	100
16700	100	100	100	100	100	100	100	100	100	100	100	98.41	100	100	100	100	100	98.15	100	100	100	100	100	100	100	100	100	100	100	100	100	100	100	100	100	100	100	100	100	100	100	100	97.06	97.22	92.31	96.55	100	100	100
16720	100	100	100	100	100	100	100	100	100	100	100	98.41	100	100	100	100	100	98.15	100	100	100	100	100	100	100	100	100	100	100	100	100	100	100	100	100	100	100	100	100	100	100	100	97.06	97.22	92.31	96.55	100	100	100
16740	100	100	100	100	100	100	100	100	100	100	100	98.41	100	100	100	100	100	98.15	100	100	100	100	100	100	100	100	100	100	100	100	100	100	100	100	100	100	100	100	100	100	100	100	97.06	97.22	92.31	96.55	100	100	100
16760	100	100	100	100	100	100	100	100	100	100	100	98.41	100	100	100	100	100	98.15	100	100	100	100	100	100	100	100	100	100	100	100	100	100	100	100	100	100	100	100	100	100	100	100	97.06	97.22	92.31	96.55	100	100	100
16780	100	100	100	100	100	100	100	100	100	100	100	98.41	100	100	100	100	100	98.15	100	100	100	100	100	100	100	100	100	100	100	100	100	100	100	100	100	100	100	100	100	100	100	100	97.06	97.22	92.31	96.55	100	100	100
16800	100	100	100	100	100	100	100	100	100	100	100	98.41	100	100	100	100	100	98.15	100	100	100	100	100	100	100	100	100	100	100	100	100	100	100	100	100	100	100	100	100	100	100	100	97.06	97.22	92.31	96.55	100	100	100
16820	100	100	100	100	100	100	100	100	100	100	100	98.41	100	100	100	100	100	98.15	100	100	100	100	100	100	100	100	100	100	100	100	100	100	100	100	100	100	100	100	100	100	100	100	97.06	97.22	92.31	96.55	100	100	100
16840	100	100	100	100	100	100	100	100	100	100	100	98.41	100	100	100	100	100	98.15	100	100	100	100	100	100	100	100	100	100	100	100	100	100	100	100	100	100	100	100	100	100	100	100	97.06	97.22	92.31	96.55	100	100	100
16860	100	100	100	100	100	100	100	100	100	100	100	98.41	100	100	100	100	100	98.15	100	100	100	100	100	100	100	100	100	100	100	100	100	100	100	100	100	100	100	100	100	100	100	100	97.06	97.22	92.31	96.55	100	100	100
16880	100	100	100	100	100	100	100	100	100	100	100	98.41	100	100	100	100	100	98.15	100	100	100	100	100	100	100	100	100	100	100	100	100	100	100	100	100	100	100	100	100	100	100	100	97.06	97.22	92.31	96.55	100	100	100
16900	100	100	100	100	100	100	100	100	100	100	100	98.41	100	100	100	100	100	98.15	100	100	100	100	100	100	100	100	100	100	100	100	100	100	100	100	100	100	100	100	100	100	100	100	97.06	97.22	92.31	96.55	100	100	100
16920	100	100	100	100	100	100	100	100	100	100	100	98.41	100	100	100	100	100	98.15	100	100	100	100	100	100	100	100	100	100	100	100	100	100	100	100	100	100	100	100	100	100	100	100	97.06	97.22	92.31	96.55	100	100	100
16940	100	100	100	100	100	100	100	100	100	100	100	98.41	100	100	100	100	100	98.15	100	100	100	100	100	100	100	100	100	100	100	100	100	100	100	100	100	100	100	100	100	100	100	100	97.06	97.22	92.31	96.55	100	100	100
16960	100	100	100	100	100	100	100	100	100	100	100	98.41	100	100	100	100	100	98.15	100	100	100	100	100	100	100	100	100	100	100	100	100	100	100	100	100	100	100	100	100	100	100	100	97.06	97.22	92.31	96.55	100	100	100
16980	100	100	100	100	100	100	100	100	100	100	100	98.41	100	100	100	100	100	98.15	100	100	100	100	100	100	100	100	100	100	100	100	100	100	100	100	100	100	100	100	100	100	100	100	97.06	97.22	92.31	96.55	100	100	100
17000	100	100	100	100	100	100	100	100	100	100	100	98.41	100	100	100	100	100	98.15	100	100	100	100	100	100	100	100	100	100	100	100	100	100	100	100	100	100	100	100	100	100	100	100	97.06	97.22	92.31	96.55	100	100	100
17020	100	100	100	100	100	100	100	100	100	100	100	98.41	100	100	100	100	100	98.15	100	100	100	100	100	100	100	100	100	100	100	100	100	100	100	100	100	100	100	100	100	100	100	100	97.06	97.22	92.31	96.55	100	100	100
17040	100	100	100	100	100	100	100	100	100	100	100	98.41	100	100	100	100	100	98.15	100	100	100	100	100	100	100	100	100	100	100	100	100	100	100	100	100	100	100	100	100	100	100	100	97.06	97.22	92.31	96.55	100	100	100
17060	100	100	100	100	100	100	100	100	100	100	100	98.41	100	100	100	100	100	98.15	100	100	100	100	100	100	100	100	100	100	100	100	100	100	100	100	100	100	100	100	100	100	100	100	97.06	97.22	92.31	96.55	100	100	100
17080	100	100	100	100	100	100	100	100	100	100	100	98.41	100	100	100	100	100	98.15	100	100	100	100	100	100	100	100	100	100	100	100	100	100	100	100	100	100	100	100	100	100	100	100	97.06	97.22	92.31	96.55	100	100	100
17100	100	100	100	100	100	100	100	100	100	100	100	98.41	100	100	100	100	100	98.15	100	100	100	100	100	100	100	100	100	100	100	100	100	100	100	100	100	100	100	100	100	100	100	100	97.06	97.22	92.31	96.55	100	100	100
17120	100	100	100	100	100	100	100	100	100	100	100	98.41	100	100	100	100	100	98.15	100	100	100	100	100	100	100	100	100	100	100	100	100	100	100	100	100	100	100	100	100	100	100	100	97.06	97.22	92.31	96.55	100	100	100
17140	100	100	100	100	100	100	100	100	100	100	100	98.41	100	100	100	100	100	98.15	100	100	100	100	100	100	100	100	100	100	100	100	100	100	100	100	100	100	100	100	100	100	100	100	97.06	97.22	92.31	96.55	100	100	100
17160	100	100	100	100	100	100	100	100	100	100	100	98.41	100	100	100	100	100	98.15	100	100	100	100	100	100	100	100	100	100	100	100	100	100	100	100	100	100	100	100	100	100	100	100	97.06	97.22	92.31	96.55	100	100	100
17180	100	100	100	100	100	100	100	100	100	100	100	98.41	100	100	100	100	100	98.15	100	100	100	100	100	100	100	100	100	100	100	100	100	100	100	100	100	100	100	100	100	100	100	100	97.06	97.22	92.31	96.55	100	100	100
17200	100	100	100	100	100	100	100	100	100	100	100	98.41	100	100	100	100	100	98.15	100	100	100	100	100	100	100	100	100	100	100	100	100	100	100	100	100	100	100	100	100	100	100	100	97.06	97.22	92.31	96.55	100	100	100
17220	100	100	100	100	100	100	100	100	100	100	100	98.41	100	100	100	100	100	98.15	100	100	100	100	100	100	100	100	100	100	100	100	100	100	100	100	100	100	100	100	100	100	100	100	97.06	97.22	92.31	96.55	100	100	100
17240	100	100	100	100	100	100	100	100	100	100	100	98.41	100	100	100	100	100	98.15	100	100	100	100	100	100	100	100	100	100	100	100	100	100	100	100	100	100	100	100	100	100	100	100	97.06	97.22	92.31	96.55	100	100	100
17260	100	100	100	100	100	100	100	100	100	100	100	98.41	100	100	100	100	100	98.15	100	100	100	100	100	100	100	100	100	100	100	100	100	100	100	100	100	100	100	100	100	100	100	100	97.06	97.22	92.31	96.55	100	100	100
17280	100	100	100	100	100	100	100	100	100	100	100	98.41	100	100	100	100	100	98.15	100	100	100	100	100	100	100	100	100	100	100	100	100	100	100	100	100	100	100	100	100	100	100	100	97.06	97.22	92.31	96.55	100	100	100
17300	100	100	100	100	100	100	100	100	100	100	100	98.41	100	100	100	100	100	98.15	100	100	100	100	100	100	100	100	100	100	100	100	100	100	100	100	100	100	100	100	100	100	100	100	97.06	97.22	92.31	96.55	100	100	100
17320	100	100	100	100	100	100	100	100	100	100	100	98.41	100	100	100	100	100	98.15	100	100	100	100	100	100	100	100	100	100	100	100	100	100	100	100	100	100	100	100	100	100	100	100	97.06	97.22	92.31	96.55	100	100	100
17340	100	100	100	100	100	100	100	100	100	100	100	98.41	100	100	100	100	100	98.15	100	100	100	100	100	100	100	100	100	100	100	100	100	100	100	100	100	100	100	100	100	100	100	100	97.06	97.22	92.31	96.55	100	100	100
17360	100	100	100	100	100	100	100	100	100	100	100	98.41	100	100	100	100	100	98.15	100	100	100	100	100	100	100	100	100	100	100	100	100	100	100	100	100	100	100	100	100	100	100	100	97.06	97.22	92.31	96.55	100	100	100
17380	100	100	100	100	100	100	100	100	100	100	100	98.41	100	100	100	100	100	98.15	100	100	100	100	100	100	100	100	100	100	100	100	100	100	100	100	100	100	100	100	100	100	100	100	97.06	97.22	92.31	96.55	100	100	100
17400	100	100	100	100	100	100	100	100	100	100	100	98.41	100	100	100	100	100	98.15	100	100	100	100	100	100	100	100	100	100	100	100	100	100	100	100	100	100	100	100	100	100	100	100	97.06	97.22	92.31	96.55	100	100	100
17420	100	100	100	100	100	100	100	100	100	100	100	98.41	100	100	100	100	100	98.15	100	100	100	100	100	100	100	100	100	100	100	100	100	100	100	100	100	100	100	100	100	100	100	100	97.06	97.22	92.31	96.55	100	100	100
17440	100	100	100	100	100	100	100	100	100	100	100	98.41	100	100	100	100	100	98.15	100	100	100	100	100	100	100	100	100	100	100	100	100	100	100	100	100	100	100	100	100	100	100	100	97.06	97.22	92.31	96.55	100	100	100
17460	100	100	100	100	100	100	100	100	100	100	100	98.41	100	100	100	100	100	98.15	100	100	100	100	100	100	100	100	100	100	100	100	100	100	100	100	100	100	100	100	100	100	100	100	97.06	97.22	92.31	96.55	100	100	100
17480	100	100	100	100	100	100	100	100	100	100	100	98.41	100	100	100	100	100	98.15	100	100	100	100	100	100	100	100	100	100	100	100	100	100	100	100	100	100	100	100	100	100	100	100	97.06	97.22	92.31	96.55	100	100	100
17500	100	100	100	100	100	100	100	100	100	100	100	98.41	100	100	100	100	100	98.15	100	100	100	100	100	100	100	100	100	100	100	100	100	100	100	100	100	100	100	100	100	100	100	100	97.06	97.22	92.31	96.55	100	100	100
17520	100	100	100	100	100	100	100	100	100	100	100	98.41	100	100	100	100	100	98.15	100	100	100	100	100	100	100	100	100	100	100	100	100	100	100	100	100	100	100	100	100	100	100	100	97.06	97.22	92.31	96.55	100	100	100
17540	100	100	100	100	100	100	100	100	100	100	100	98.41	100	100	100	100	100	98.15	100	100	100	100	100	100	100	100	100	100	100	100	100	100	100	100	100	100	100	100	100	100	100	100	97.06	97.22	92.31	96.55	100	100	100
17560	100	100	100	100	100	100	100	100	100	100	100	98.41	100	100	100	100	100	98.15	100	100	100	100	100	100	100	100	100	100	100	100	100	100	100	100	100	100	100	100	100	100	100	100	97.06	97.22	92.31	96.55	100	100	100
17580	100	100	100	100	100	100	100	100	100	100	100	98.41	100	100	100	100	100	98.15	100	100	100	100	100	100	100	100	100	100	100	100	100	100	100	100	100	100	100	100	100	100	100	100	97.06	97.22	92.31	96.55	100	100	100
17600	100	100	100	100	100	100	100	100	100	100	100	98.41	100	100	100	100	100	98.15	100	100	100	100	100	100	100	100	100	100	100	100	100	100	100	100	100	100	100	100	100	100	100	100	97.06	97.22	92.31	96.55	100	100	100
17620	100	100	100	100	100	100	100	100	100	100	100	98.41	100	100	100	100	100	98.15	100	100	100	100	100	100	100	100	100	100	100	100	100	100	100	100	100	100	100	100	100	100	100	100	97.06	97.22	92.31	96.55	100	100	100
17640	100	100	100	100	100	100	100	100	100	100	100	98.41	100	100	100	100	100	98.15	100	100	100	100	100	100	100	100	100	100	100	100	100	100	100	100	100	100	100	100	100	100	100	100	97.06	97.22	92.31	96.55	100	100	100
17660	100	100	100	100	100	100	100	100	100	100	100	98.41	100	100	100	100	100	98.15	100	100	100	100	100	100	100	100	100	100	100	100	100	100	100	100	100	100	100	100	100	100	100	100	97.06	97.22	92.31	96.55	100	100	100
17680	100	100	100	100	100	100	100	100	100	100	100	98.41	100	100	100	100	100	98.15	100	100	100	100	100	100	100	100	100	100	100	100	100	100	100	100	100	100	100	100	100	100	100	100	97.06	97.22	92.31	96.55	100	100	100
17700	100	100	100	100	100	100	100	100	100	100	100	98.41	100	100	100	100	100	98.15	100	100	100	100	100	100	100	100	100	100	100	100	100	100	100	100	100	100	100	100	100	100	100	100	97.06	97.22	92.31	96.55	100	100	100
17720	100	100	100	100	100	100	100	100	100	100	100	98.41	100	100	100	100	100	98.15	100	100	100	100	100	100	100	100	100	100	100	100	100	100	100	100	100	100	100	100	100	100	100	100	97.06	97.22	92.31	96.55	100	100	100
17740	100	100	100	100	100	100	100	100	100	100	100	98.41	100	100	100	100	100	98.15	100	100	100	100	100	100	100	100	100	100	100	100	100	100	100	100	100	100	100	100	100	100	100	100	97.06	97.22	92.31	96.55	100	100	100
17760	100	100	100	100	100	100	100	100	100	100	100	98.41	100	100	100	100	100	98.15	100	100	100	100	100	100	100	100	100	100	100	100	100	100	100	100	100	100	100	100	100	100	100	100	97.06	97.22	92.31	96.55	100	100	100
17780	100	100	100	100	100	100	100	100	100	100	100	98.41	100	100	100	100	100	98.15	100	100	100	100	100	100	100	100	100	100	100	100	100	100	100	100	100	100	100	100	100	100	100	100	97.06	97.22	92.31	96.55	100	100	100
17800	100	100	100	100	100	100	100	100	100	100	100	98.41	100	100	100	100	100	98.15	100	100	100	100	100	100	100	100	100	100	100	100	100	100	100	100	100	100	100	100	100	100	100	100	97.06	97.22	92.31	96.55	100	100	100
17820	100	100	100	100	100	100	100	100	100	100	100	98.41	100	100	100	100	100	98.15	100	100	100	100	100	100	100	100	100	100	100	100	100	100	100	100	100	100	100	100	100	100	100	100	97.06	97.22	92.31	96.55	100	100	100
17840	100	100	100	100	100	100	100	100	100	100	100	98.41	100	100	100	100	100	98.15	100	100	100	100	100	100	100	100	100	100	100	100	100	100	100	100	100	100	100	100	100	100	100	100	97.06	97.22	92.31	96.55	100	100	100
17860	100	100	100	100	100	100	100	100	100	100	100	98.41	100	100	100	100	100	98.15	100	100	100	100	100	100	100	100	100	100	100	100	100	100	100	100	100	100	100	100	100	100	100	100	97.06	97.22	92.31	96.55	100	100	100
17880	100	100	100	100	100	100	100	100	100	100	100	98.41	100	100	100	100	100	98.15	100	100	100	100	100	100	100	100	100	100	100	100	100	100	100	100	100	100	100	100	100	100	100	100	97.06	97.22	92.31	96.55	100	100	100
17900	100	100	100	100	100	100	100	100	100	100	100	98.41	100	100	100	100	100	98.15	100	100	100	100	100	100	100	100	100	100	100	100	100	100	100	100	100	100	100	100	100	100	100	100	97.06	97.22	92.31	96.55	100	100	100
17920	100	100	100	100	100	100	100	100	100	100	100	98.41	100	100	100	100	100	98.15	100	100	100	100	100	100	100	100	100	100	100	100	100	100	100	100	100	100	100	100	100	100	100	100	97.06	97.22	92.31	96.55	100	100	100
17940	100	100	100	100	100	100	100	100	100	100	100	98.41	100	100	100	100	100	98.15	100	100	100	100	100	100	100	100	100	100	100	100	100	100	100	100	100	100	100	100	100	100	100	100	97.06	97.22	92.31	96.55	100	100	100
17960	100	100	100	100	100	100	100	100	100	100	100	98.41	100	100	100	100	100	98.15	100	100	100	100	100	100	100	100	100	100	100	100	100	100	100	100	100	100	100	100	100	100	100	100	97.06	97.22	92.31	96.55	100	100	100
17980	100	100	100	100	100	100	100	100	100	100	100	98.41	100	100	100	100	100	98.15	100	100	100	100	100	100	100	100	100	100	100	100	100	100	100	100	100	100	100	100	100	100	100	100	97.06	97.22	92.31	96.55	100	100	100
18000	100	100	100	100	100	100	100	100	100	100	100	98.41	100	100	100	100	100	98.15	100	100	100	100	100	100	100	100	100	100	100	100	100	100	100	100	100	100	100	100	100	100	100	100	97.06	97.22	92.31	96.55	100	100	100
18020	100	100	100	100	100	100	100	100	100	100	100	98.41	100	100	100	100	100	98.15	100	100	100	100	100	100	100	100	100	100	100	100	100	100	100	100	100	100	100	100	100	100	100	100	97.06	97.22	92.31	96.55	100	100	100
18040	100	100	100	100	100	100	100	100	100	100	100	98.41	100	100	100	100	100	98.15	100	100	100	100	100	100	100	100	100	100	100	100	100	100	100	100	100	100	100	100	100	100	100	100	97.06	97.22	92.31	96.55	100	100	100
18060	100	100	100	100	100	100	100	100	100	100	100	98.41	100	100	100	100	100	98.15	100	100	100	100	100	100	100	100	100	100	100	100	100	100	100	100	100	100	100	100	100	100	100	100	97.06	97.22	92.31	96.55	100	100	100
18080	100	100	100	100	100	100	100	100	100	100	100	98.41	100	100	100	100	100	98.15	100	100	100	100	100	100	100	100	100	100	100	100	100	100	100	100	100	100	100	100	100	100	100	100	97.06	97.22	92.31	96.55	100	100	100
18100	100	100	100	100	100	100	100	100	100	100	100	98.41	100	100	100	100	100	98.15	100	100	100	100	100	100	100	100	100	100	100	100	100	100	100	100	100	100	100	100	100	100	100	100	97.06	97.22	92.31	96.55	100	100	100
18120	100	100	100	100	100	100	100	100	100	100	100	98.41	100	100	100	100	100	98.15	100	100	100	100	100	100	100	100	100	100	100	100	100	100	100	100	100	100	100	100	100	100	100	100	97.06	97.22	92.31	96.55	100	100	100
18140	100	100	100	100	100	100	100	100	100	100	100	98.41	100	100	100	100	100	98.15	100	100	100	100	100	100	100	100	100	100	100	100	100	100	100	100	100	100	100	100	100	100	100	100	97.06	97.22	92.31	96.55	100	100	100
18160	100	100	100	100	100	100	100	100	100	100	100	98.41	100	100	100	100	100	98.15	100	100	100	100	100	100	100	100	100	100	100	100	100	100	100	100	100	100	100	100	100	100	100	100	97.06	97.22	92.31	96.55	100	100	100
18180	100	100	100	100	100	100	100	100	100	100	100	98.41	100	100	100	100	100	98.15	100	100	100	100	100	100	100	100	100	100	100	100	100	100	100	100	100	100	100	100	100	100	100	100	97.06	97.22	92.31	96.55	100	100	100
18200	100	100	100	100	100	100	100	100	100	100	100	98.41	100	100	100	100	100	98.15	100	100	100	100	100	100	100	100	100	100	100	100	100	100	100	100	100	100	100	100	100	100	100	100	97.06	97.22	92.31	96.55	100	100	100
18220	100	100	100	100	100	100	100	100	100	100	100	98.41	100	100	100	100	100	98.15	100	100	100	100	100	100	100	100	100	100	100	100	100	100	100	100	100	100	100	100	100	100	100	100	97.06	97.22	92.31	96.55	100	100	100
18240	100	100	100	100	100	100	100	100	100	100	100	98.41	100	100	100	100	100	98.15	100	100	100	100	100	100	100	100	100	100	100	100	100	100	100	100	100	100	100	100	100	100	100	100	97.06	97.22	92.31	96.55	100	100	100
18260	100	100	100	100	100	100	100	100	100	100	100	98.41	100	100	100	100	100	98.15	100	100	100	100	100	100	100	100	100	100	100	100	100	100	100	100	100	100	100	100	100	100	100	100	97.06	97.22	92.31	96.55	100	100	100
18280	100	100	100	100	100	100	100	100	100	100	100	98.41	100	100	100	100	100	98.15	100	100	100	100	100	100	100	100	100	100	100	100	100	100	100	100	100	100	100	100	100	100	100	100	97.06	97.22	92.31	96.55	100	100	100
18300	100	100	100	100	100	100	100	100	100	100	100	98.41	100	100	100	100	100	98.15	100	100	100	100	100	100	100	100	100	100	100	100	100	100	100	100	100	100	100	100	100	100	100	100	97.06	97.22	92.31	96.55	100	100	100
18320	100	100	100	100	100	100	100	100	100	100	100	98.41	100	100	100	100	100	98.15	100	100	100	100	100	100	100	100	100	100	100	100	100	100	100	100	100	100	100	100	100	100	100	100	97.06	97.22	92.31	96.55	100	100	100
18340	100	100	100	100	100	100	100	100	100	100	100	98.41	100	100	100	100	100	98.15	100	100	100	100	100	100	100	100	100	100	100	100	100	100	100	100	100	100	100	100	100	100	100	100	97.06	97.22	92.31	96.55	100	100	100
18360	100	100	100	100	100	100	100	100	100	100	100	98.41	100	100	100	100	100	98.15	100	100	100	100	100	100	100	100	100	100	100	100	100	100	100	100	100	100	100	100	100	100	100	100	97.06	97.22	92.31	96.55	100	100	100
18380	100	100	100	100	100	100	100	100	100	100	100	98.41	100	100	100	100	100	98.15	100	100	100	100	100	100	100	100	100	100	100	100	100	100	100	100	100	100	100	100	100	100	100	100	97.06	97.22	92.31	96.55	100	100	100
18400	100	100	100	100	100	100	100	100	100	100	100	98.41	100	100	100	100	100	98.15	100	100	100	100	100	100	100	100	100	100	100	100	100	100	100	100	100	100	100	100	100	100	100	100	97.06	97.22	92.31	96.55	100	100	100
18420	100	100	100	100	100	100	100	100	100	100	100	98.41	100	100	100	100	100	98.15	100	100	100	100	100	100	100	100	100	100	100	100	100	100	100	100	100	100	100	100	100	100	100	100	97.06	97.22	92.31	96.55	100	100	100
18440	100	100	100	100	100	100	100	100	100	100	100	98.41	100	100	100	100	100	98.15	100	100	100	100	100	100	100	100	100	100	100	100	100	100	100	100	100	100	100	100	100	100	100	100	97.06	97.22	92.31	96.55	100	100	100
18460	100	100	100	100	100	100	100	100	100	100	100	98.41	100	100	100	100	100	98.15	100	100	100	100	100	100	100	100	100	100	100	100	100	100	100	100	100	100	100	100	100	100	100	100	97.06	97.22	92.31	96.55	100	100	100
18480	100	100	100	100	100	100	100	100	100	100	100	98.41	100	100	100	100	100	98.15	100	100	100	100	100	100	100	100	100	100	100	100	100	100	100	100	100	100	100	100	100	100	100	100	97.06	97.22	92.31	96.55	100	100	100
18500	100	100	100	100	100	100	100	100	100	100	100	98.41	100	100	100	100	100	98.15	100	100	100	100	100	100	100	100	100	100	100	100	100	100	100	100	100	100	100	100	100	100	100	100	97.06	97.22	92.31	96.55	100	100	100
18520	100	100	100	100	100	100	100	100	100	100	100	98.41	100	100	100	100	100	98.15	100	100	100	100	100	100	100	100	100	100	100	100	100	100	100	100	100	100	100	100	100	100	100	100	97.06	97.22	92.31	96.55	100	100	100
18540	100	100	100	100	100	100	100	100	100	100	100	98.41	100	100	100	100	100	98.15	100	100	100	100	100	100	100	100	100	100	100	100	100	100	100	100	100	100	100	100	100	100	100	100	97.06	97.22	92.31	96.55	100	100	100
18560	100	100	100	100	100	100	100	100	100	100	100	98.41	100	100	100	100	100	98.15	100	100	100	100	100	100	100	100	100	100	100	100	100	100	100	100	100	100	100	100	100	100	100	100	97.06	97.22	92.31	96.55	100	100	100
18580	100	100	100	100	100	100	100	100	100	100	100	98.41	100	100	100	100	100	98.15	100	100	100	100	100	100	100	100	100	100	100	100	100	100	100	100	100	100	100	100	100	100	100	100	97.06	97.22	92.31	96.55	100	100	100
18600	100	100	100	100	100	100	100	100	100	100	100	98.41	100	100	100	100	100	98.15	100	100	100	100	100	100	100	100	100	100	100	100	100	100	100	100	100	100	100	100	100	100	100	100	97.06	97.22	92.31	96.55	100	100	100
18620	100	100	100	100	100	100	100	100	100	100	100	98.41	100	100	100	100	100	98.15	100	100	100	100	100	100	100	100	100	100	100	100	100	100	100	100	100	100	100	100	100	100	100	100	97.06	97.22	92.31	96.55	100	100	100
18640	100	100	100	100	100	100	100	100	100	100	100	98.41	100	100	100	100	100	98.15	100	100	100	100	100	100	100	100	100	100	100	100	100	100	100	100	100	100	100	100	100	100	100	100	97.06	97.22	92.31	96.55	100	100	100
18660	100	100	100	100	100	100	100	100	100	100	100	98.41	100	100	100	100	100	98.15	100	100	100	100	100	100	100	100	100	100	100	100	100	100	100	100	100	100	100	100	100	100	100	100	97.06	97.22	92.31	96.55	100	100	100
18680	100	100	100	100	100	100	100	100	100	100	100	98.41	100	100	100	100	100	98.15	100	100	100	100	100	100	100	100	100	100	100	100	100	100	100	100	100	100	100	100	100	100	100	100	97.06	97.22	92.31	96.55	100	100	100
18700	100	100	100	100	100	100	100	100	100	100	100	98.41	100	100	100	100	100	98.15	100	100	100	100	100	100	100	100	100	100	100	100	100	100	100	100	100	100	100	100	100	100	100	100	97.06	97.22	92.31	96.55	100	100	100
18720	100	100	100	100	100	100	100	100	100	100	100	98.41	100	100	100	100	100	98.15	100	100	100	100	100	100	100	100	100	100	100	100	100	100	100	100	100	100	100	100	100	100	100	100	97.06	97.22	92.31	96.55	100	100	100
18740	100	100	100	100	100	100	100	100	100	100	100	98.41	100	100	100	100	100	98.15	100	100	100	100	100	100	100	100	100	100	100	100	100	100	100	100	100	100	100	100	100	100	100	100	97.06	97.22	92.31	96.55	100	100	100
18760	100	100	100	100	100	100	100	100	100	100	100	98.41	100	100	100	100	100	98.15	100	100	100	100	100	100	100	100	100	100	100	100	100	100	100	100	100	100	100	100	100	100	100	100	97.06	97.22	92.31	96.55	100	100	100
18780	100	100	100	100	100	100	100	100	100	100	100	98.41	100	100	100	100	100	98.15	100	100	100	100	100	100	100	100	100	100	100	100	100	100	100	100	100	100	100	100	100	100	100	100	97.06	97.22	92.31	96.55	100	100	100
18800	100	100	100	100	100	100	100	100	100	100	100	98.41	100	100	100	100	100	98.15	100	100	100	100	100	100	100	100	100	100	100	100	100	100	100	100	100	100	100	100	100	100	100	100	97.06	97.22	92.31	96.55	100	100	100
18820	100	100	100	100	100	100	100	100	100	100	100	98.41	100	100	100	100	100	98.15	100	100	100	100	100	100	100	100	100	100	100	100	100	100	100	100	100	100	100	100	100	100	100	100	97.06	97.22	92.31	96.55	100	100	100
18840	100	100	100	100	100	100	100	100	100	100	100	98.41	100	100	100	100	100	98.15	100	100	100	100	100	100	100	100	100	100	100	100	100	100	100	100	100	100	100	100	100	100	100	100	97.06	97.22	92.31	96.55	100	100	100
18860	100	100	100	100	100	100	100	100	100	100	100	98.41	100	100	100	100	100	98.15	100	100	100	100	100	100	100	100	100	100	100	100	100	100	100	100	100	100	100	100	100	100	100	100	97.06	97.22	92.31	96.55	100	100	100
18880	100	100	100	100	100	100	100	100	100	100	100	98.41	100	100	100	100	100	98.15	100	100	100	100	100	100	100	100	100	100	100	100	100	100	100	100	100	100	100	100	100	100	100	100	97.06	97.22	92.31	96.55	100	100	100
18900	100	100	100	100	100	100	100	100	100	100	100	98.41	100	100	100	100	100	98.15	100	100	100	100	100	100	100	100	100	100	100	100	100	100	100	100	100	100	100	100	100	100	100	100	97.06	97.22	92.31	96.55	100	100	100
18920	100	100	100	100	100	100	100	100	100	100	100	98.41	100	100	100	100	100	98.15	100	100	100	100	100	100	100	100	100	100	100	100	100	100	100	100	100	100	100	100	100	100	100	100	97.06	97.22	92.31	96.55	100	100	100
18940	100	100	100	100	100	100	100	100	100	100	100	98.41	100	100	100	100	100	98.15	100	100	100	100	100	100	100	100	100	100	100	100	100	100	100	100	100	100	100	100	100	100	100	100	97.06	97.22	92.31	96.55	100	100	100
18960	100	100	100	100	100	100	100	100	100	100	100	98.41	100	100	100	100	100	98.15	100	100	100	100	100	100	100	100	100	100	100	100	100	100	100	100	100	100	100	100	100	100	100	100	97.06	97.22	92.31	96.55	100	100	100
18980	100	100	100	100	100	100	100	100	100	100	100	98.41	100	100	100	100	100	98.15	100	100	100	100	100	100	100	100	100	100	100	100	100	100	100	100	100	100	100	100	100	100	100	100	97.06	97.22	92.31	96.55	100	100	100
19000	100	100	100	100	100	100	100	100	100	100	100	98.41	100	100	100	100	100	98.15	100	100	100	100	100	100	100	100	100	100	100	100	100	100	100	100	100	100	100	100	100	100	100	100	97.06	97.22	92.31	96.55	100	100	100
19020	100	100	100	100	100	100	100	100	100	100	100	98.41	100	100	100	100	100	98.15	100	100	100	100	100	100	100	100	100	100	100	100	100	100	100	100	100	100	100	100	100	100	100	100	97.06	97.22	92.31	96.55	100	100	100
19040	100	100	100	100	100	100	100	100	100	100	100	98.41	100	100	100	100	100	98.15	100	100	100	100	100	100	100	100	100	100	100	100	100	100	100	100	100	100	100	100	100	100	100	100	97.06	97.22	92.31	96.55	100	100	100
19060	100	100	100	100	100	100	100	100	100	100	100	98.41	100	100	100	100	100	98.15	100	100	100	100	100	100	100	100	100	100	100	100	100	100	100	100	100	100	100	100	100	100	100	100	97.06	97.22	92.31	96.55	100	100	100
19080	100	100	100	100	100	100	100	100	100	100	100	98.41	100	100	100	100	100	98.15	100	100	100	100	100	100	100	100	100	100	100	100	100	100	100	100	100	100	100	100	100	100	100	100	97.06	97.22	92.31	96.55	100	100	100
19100	100	100	100	100	100	100	100	100	100	100	100	98.41	100	100	100	100	100	98.15	100	100	100	100	100	100	100	100	100	100	100	100	100	100	100	100	100	100	100	100	100	100	100	100	97.06	97.22	92.31	96.55	100	100	100
19120	100	100	100	100	100	100	100	100	100	100	100	98.41	100	100	100	100	100	98.15	100	100	100	100	100	100	100	100	100	100	100	100	100	100	100	100	100	100	100	100	100	100	100	100	97.06	97.22	92.31	96.55	100	100	100
19140	100	100	100	100	100	100	100	100	100	100	100	98.41	100	100	100	100	100	98.15	100	100	100	100	100	100	100	100	100	100	100	100	100	100	100	100	100	100	100	100	100	100	100	100	97.06	97.22	92.31	96.55	100	100	100
19160	100	100	100	100	100	100	100	100	100	100	100	98.41	100	100	100	100	100	98.15	100	100	100	100	100	100	100	100	100	100	100	100	100	100	100	100	100	100	100	100	100	100	100	100	97.06	97.22	92.31	96.55	100	100	100
19180	100	100	100	100	100	100	100	100	100	100	100	98.41	100	100	100	100	100	98.15	100	100	100	100	100	100	100	100	100	100	100	100	100	100	100	100	100	100	100	100	100	100	100	100	97.06	97.22	92.31	96.55	100	100	100
19200	100	100	100	100	100	100	100	100	100	100	100	98.41	100	100	100	100	100	98.15	100	100	100	100	100	100	100	100	100	100	100	100	100	100	100	100	100	100	100	100	100	100	100	100	97.06	97.22	92.31	96.55	100	100	100
19220	100	100	100	100	100	100	100	100	100	100	100	98.41	100	100	100	100	100	98.15	100	100	100	100	100	100	100	100	100	100	100	100	100	100	100	100	100	100	100	100	100	100	100	100	97.06	97.22	92.31	96.55	100	100	100
19240	100	100	100	100	100	100	100	100	100	100	100	98.41	100	100	100	100	100	98.15	100	100	100	100	100	100	100	100	100	100	100	100	100	100	100	100	100	100	100	100	100	100	100	100	97.06	97.22	92.31	96.55	100	100	100
19260	100	100	100	100	100	100	100	100	100	100	100	98.41	100	100	100	100	100	98.15	100	100	100	100	100	100	100	100	100	100	100	100	100	100	100	100	100	100	100	100	100	100	100	100	97.06	97.22	92.31	96.55	100	100	100
19280	100	100	100	100	100	100	100	100	100	100	100	98.41	100	100	100	100	100	98.15	100	100	100	100	100	100	100	100	100	100	100	100	100	100	100	100	100	100	100	100	100	100	100	100	97.06	97.22	92.31	96.55	100	100	100
19300	100	100	100	100	100	100	100	100	100	100	100	98.41	100	100	100	100	100	98.15	100	100	100	100	100	100	100	100	100	100	100	100	100	100	100	100	100	100	100	100	100	100	100	100	97.06	97.22	92.31	96.55	100	100	100
19320	100	100	100	100	100	100	100	100	100	100	100	98.41	100	100	100	100	100	98.15	100	100	100	100	100	100	100	100	100	100	100	100	100	100	100	100	100	100	100	100	100	100	100	100	97.06	97.22	92.31	96.55	100	100	100
19340	100	100	100	100	100	100	100	100	100	100	100	98.41	100	100	100	100	100	98.15	100	100	100	100	100	100	100	100	100	100	100	100	100	100	100	100	100	100	100	100	100	100	100	100	97.06	97.22	92.31	96.55	100	100	100
19360	100	100	100	100	100	100	100	100	100	100	100	100	100	100	100	100	100	98.15	100	100	100	100	100	100	100	100	100	100	100	100	100	100	100	100	100	100	100	100	100	100	100	100	97.06	97.22	92.31	96.55	100	100	100
19380	100	100	100	100	100	100	100	100	100	100	100	100	100	100	100	100	100	98.15	100	100	100	100	100	100	100	100	100	100	100	100	100	100	100	100	100	100	100	100	100	100	100	100	97.06	97.22	92.31	96.55	100	100	100
19400	100	100	100	100	100	100	100	100	100	100	100	100	100	100	100	100	100	98.15	100	100	100	100	100	100	100	100	100	100	100	100	100	100	100	100	100	100	100	100	100	100	100	100	97.06	97.22	92.31	96.55	100	100	100
19420	100	100	100	100	100	100	100	100	100	100	100	100	100	100	100	100	100	98.15	100	100	100	100	100	100	100	100	100	100	100	100	100	100	100	100	100	100	100	100	100	100	100	100	97.06	97.22	92.31	96.55	100	100	100
19440	100	100	100	100	100	100	100	100	100	100	100	100	100	100	100	100	100	98.15	100	100	100	100	100	100	100	100	100	100	100	100	100	100	100	100	100	100	100	100	100	100	100	100	97.06	97.22	92.31	96.55	100	100	100
19460	100	100	100	100	100	100	100	100	100	100	100	100	100	100	100	100	100	98.15	100	100	100	100	100	100	100	100	100	100	100	100	100	100	100	100	100	100	100	100	100	100	100	100	97.06	97.22	92.31	96.55	100	100	100
19480	100	100	100	100	100	100	100	100	100	100	100	100	100	100	100	100	100	98.15	100	100	100	100	100	100	100	100	100	100	100	100	100	100	100	100	100	100	100	100	100	100	100	100	97.06	97.22	92.31	96.55	100	100	100
19500	100	100	100	100	100	100	100	100	100	100	100	100	100	100	100	100	100	98.15	100	100	100	100	100	100	100	100	100	100	100	100	100	100	100	100	100	100	100	100	100	100	100	100	97.06	97.22	92.31	96.55	100	100	100
19520	100	100	100	100	100	100	100	100	100	100	100	100	100	100	100	100	100	98.15	100	100	100	100	100	100	100	100	100	100	100	100	100	100	100	100	100	100	100	100	100	100	100	100	97.06	97.22	92.31	96.55	100	100	100
19540	100	100	100	100	100	100	100	100	100	100	100	100	100	100	100	100	100	100	100	100	100	100	100	100	100	100	100	100	100	100	100	100	100	100	100	100	100	100	100	100	100	100	97.06	97.22	92.31	96.55	100	100	100
19560	100	100	100	100	100	100	100	100	100	100	100	100	100	100	100	100	100	100	100	100	100	100	100	100	100	100	100	100	100	100	100	100	100	100	100	100	100	100	100	100	100	100	97.06	97.22	92.31	96.55	100	100	100
19580	100	100	100	100	100	100	100	100	100	100	100	100	100	100	100	100	100	100	100	100	100	100	100	100	100	100	100	100	100	100	100	100	100	100	100	100	100	100	100	100	100	100	97.06	97.22	92.31	96.55	100	100	100
19600	100	100	100	100	100	100	100	100	100	100	100	100	100	100	100	100	100	100	100	100	100	100	100	100	100	100	100	100	100	100	100	100	100	100	100	100	100	100	100	100	100	100	97.06	97.22	92.31	96.55	100	100	100
19620	100	100	100	100	100	100	100	100	100	100	100	100	100	100	100	100	100	100	100	100	100	100	100	100	100	100	100	100	100	100	100	100	100	100	100	100	100	100	100	100	100	100	97.06	97.22	92.31	96.55	100	100	100
19640	100	100	100	100	100	100	100	100	100	100	100	100	100	100	100	100	100	100	100	100	100	100	100	100	100	100	100	100	100	100	100	100	100	100	100	100	100	100	100	100	100	100	97.06	97.22	92.31	96.55	100	100	100
19660	100	100	100	100	100	100	100	100	100	100	100	100	100	100	100	100	100	100	100	100	100	100	100	100	100	100	100	100	100	100	100	100	100	100	100	100	100	100	100	100	100	100	97.06	97.22	92.31	96.55	100	100	100
19680	100	100	100	100	100	100	100	100	100	100	100	100	100	100	100	100	100	100	100	100	100	100	100	100	100	100	100	100	100	100	100	100	100	100	100	100	100	100	100	100	100	100	97.06	97.22	92.31	96.55	100	100	100
19700	100	100	100	100	100	100	100	100	100	100	100	100	100	100	100	100	100	100	100	100	100	100	100	100	100	100	100	100	100	100	100	100	100	100	100	100	100	100	100	100	100	100	97.06	97.22	92.31	96.55	100	100	100
19720	100	100	100	100	100	100	100	100	100	100	100	100	100	100	100	100	100	100	100	100	100	100	100	100	100	100	100	100	100	100	100	100	100	100	100	100	100	100	100	100	100	100	97.06	100	92.31	96.55	100	100	100
19740	100	100	100	100	100	100	100	100	100	100	100	100	100	100	100	100	100	100	100	100	100	100	100	100	100	100	100	100	100	100	100	100	100	100	100	100	100	100	100	100	100	100	97.06	100	92.31	96.55	100	100	100
19760	100	100	100	100	100	100	100	100	100	100	100	100	100	100	100	100	100	100	100	100	100	100	100	100	100	100	100	100	100	100	100	100	100	100	100	100	100	100	100	100	100	100	97.06	100	92.31	96.55	100	100	100
19780	100	100	100	100	100	100	100	100	100	100	100	100	100	100	100	100	100	100	100	100	100	100	100	100	100	100	100	100	100	100	100	100	100	100	100	100	100	100	100	100	100	100	97.06	100	92.31	96.55	100	100	100
19800	100	100	100	100	100	100	100	100	100	100	100	100	100	100	100	100	100	100	100	100	100	100	100	100	100	100	100	100	100	100	100	100	100	100	100	100	100	100	100	100	100	100	97.06	100	92.31	96.55	100	100	100
19820	100	100	100	100	100	100	100	100	100	100	100	100	100	100	100	100	100	100	100	100	100	100	100	100	100	100	100	100	100	100	100	100	100	100	100	100	100	100	100	100	100	100	97.06	100	92.31	96.55	100	100	100
19840	100	100	100	100	100	100	100	100	100	100	100	100	100	100	100	100	100	100	100	100	100	100	100	100	100	100	100	100	100	100	100	100	100	100	100	100	100	100	100	100	100	100	97.06	100	92.31	96.55	100	100	100
19860	100	100	100	100	100	100	100	100	100	100	100	100	100	100	100	100	100	100	100	100	100	100	100	100	100	100	100	100	100	100	100	100	100	100	100	100	100	100	100	100	100	100	97.06	100	92.31	96.55	100	100	100
19880	100	100	100	100	100	100	100	100	100	100	100	100	100	100	100	100	100	100	100	100	100	100	100	100	100	100	100	100	100	100	100	100	100	100	100	100	100	100	100	100	100	100	97.06	100	92.31	96.55	100	100	100
19900	100	100	100	100	100	100	100	100	100	100	100	100	100	100	100	100	100	100	100	100	100	100	100	100	100	100	100	100	100	100	100	100	100	100	100	100	100	100	100	100	100	100	97.06	100	92.31	96.55	100	100	100
19920	100	100	100	100	100	100	100	100	100	100	100	100	100	100	100	100	100	100	100	100	100	100	100	100	100	100	100	100	100	100	100	100	100	100	100	100	100	100	100	100	100	100	97.06	100	92.31	96.55	100	100	100
19940	100	100	100	100	100	100	100	100	100	100	100	100	100	100	100	100	100	100	100	100	100	100	100	100	100	100	100	100	100	100	100	100	100	100	100	100	100	100	100	100	100	100	97.06	100	92.31	96.55	100	100	100
19960	100	100	100	100	100	100	100	100	100	100	100	100	100	100	100	100	100	100	100	100	100	100	100	100	100	100	100	100	100	100	100	100	100	100	100	100	100	100	100	100	100	100	97.06	100	92.31	96.55	100	100	100
19980	100	100	100	100	100	100	100	100	100	100	100	100	100	100	100	100	100	100	100	100	100	100	100	100	100	100	100	100	100	100	100	100	100	100	100	100	100	100	100	100	100	100	97.06	100	92.31	96.55	100	100	100
20000	100	100	100	100	100	100	100	100	100	100	100	100	100	100	100	100	100	100	100	100	100	100	100	100	100	100	100	100	100	100	100	100	100	100	100	100	100	100	100	100	100	100	97.06	100	92.31	96.55	100	100	100
20020	100	100	100	100	100	100	100	100	100	100	100	100	100	100	100	100	100	100	100	100	100	100	100	100	100	100	100	100	100	100	100	100	100	100	100	100	100	100	100	100	100	100	97.06	100	92.31	96.55	100	100	100
20040	100	100	100	100	100	100	100	100	100	100	100	100	100	100	100	100	100	100	100	100	100	100	100	100	100	100	100	100	100	100	100	100	100	100	100	100	100	100	100	100	100	100	97.06	100	92.31	96.55	100	100	100
20060	100	100	100	100	100	100	100	100	100	100	100	100	100	100	100	100	100	100	100	100	100	100	100	100	100	100	100	100	100	100	100	100	100	100	100	100	100	100	100	100	100	100	97.06	100	92.31	96.55	100	100	100
20080	100	100	100	100	100	100	100	100	100	100	100	100	100	100	100	100	100	100	100	100	100	100	100	100	100	100	100	100	100	100	100	100	100	100	100	100	100	100	100	100	100	100	97.06	100	92.31	96.55	100	100	100
20100	100	100	100	100	100	100	100	100	100	100	100	100	100	100	100	100	100	100	100	100	100	100	100	100	100	100	100	100	100	100	100	100	100	100	100	100	100	100	100	100	100	100	97.06	100	92.31	96.55	100	100	100
20120	100	100	100	100	100	100	100	100	100	100	100	100	100	100	100	100	100	100	100	100	100	100	100	100	100	100	100	100	100	100	100	100	100	100	100	100	100	100	100	100	100	100	97.06	100	92.31	96.55	100	100	100
20140	100	100	100	100	100	100	100	100	100	100	100	100	100	100	100	100	100	100	100	100	100	100	100	100	100	100	100	100	100	100	100	100	100	100	100	100	100	100	100	100	100	100	97.06	100	92.31	96.55	100	100	100
20160	100	100	100	100	100	100	100	100	100	100	100	100	100	100	100	100	100	100	100	100	100	100	100	100	100	100	100	100	100	100	100	100	100	100	100	100	100	100	100	100	100	100	97.06	100	92.31	96.55	100	100	100
20180	100	100	100	100	100	100	100	100	100	100	100	100	100	100	100	100	100	100	100	100	100	100	100	100	100	100	100	100	100	100	100	100	100	100	100	100	100	100	100	100	100	100	97.06	100	92.31	96.55	100	100	100
20200	100	100	100	100	100	100	100	100	100	100	100	100	100	100	100	100	100	100	100	100	100	100	100	100	100	100	100	100	100	100	100	100	100	100	100	100	100	100	100	100	100	100	97.06	100	92.31	96.55	100	100	100
20220	100	100	100	100	100	100	100	100	100	100	100	100	100	100	100	100	100	100	100	100	100	100	100	100	100	100	100	100	100	100	100	100	100	100	100	100	100	100	100	100	100	100	97.06	100	92.31	96.55	100	100	100
20240	100	100	100	100	100	100	100	100	100	100	100	100	100	100	100	100	100	100	100	100	100	100	100	100	100	100	100	100	100	100	100	100	100	100	100	100	100	100	100	100	100	100	97.06	100	92.31	96.55	100	100	100
20260	100	100	100	100	100	100	100	100	100	100	100	100	100	100	100	100	100	100	100	100	100	100	100	100	100	100	100	100	100	100	100	100	100	100	100	100	100	100	100	100	100	100	97.06	100	92.31	96.55	100	100	100
20280	100	100	100	100	100	100	100	100	100	100	100	100	100	100	100	100	100	100	100	100	100	100	100	100	100	100	100	100	100	100	100	100	100	100	100	100	100	100	100	100	100	100	97.06	100	92.31	96.55	100	100	100
20300	100	100	100	100	100	100	100	100	100	100	100	100	100	100	100	100	100	100	100	100	100	100	100	100	100	100	100	100	100	100	100	100	100	100	100	100	100	100	100	100	100	100	97.06	100	92.31	96.55	100	100	100
20320	100	100	100	100	100	100	100	100	100	100	100	100	100	100	100	100	100	100	100	100	100	100	100	100	100	100	100	100	100	100	100	100	100	100	100	100	100	100	100	100	100	100	97.06	100	92.31	96.55	100	100	100
20340	100	100	100	100	100	100	100	100	100	100	100	100	100	100	100	100	100	100	100	100	100	100	100	100	100	100	100	100	100	100	100	100	100	100	100	100	100	100	100	100	100	100	97.06	100	92.31	96.55	100	100	100
20360	100	100	100	100	100	100	100	100	100	100	100	100	100	100	100	100	100	100	100	100	100	100	100	100	100	100	100	100	100	100	100	100	100	100	100	100	100	100	100	100	100	100	97.06	100	92.31	96.55	100	100	100
20380	100	100	100	100	100	100	100	100	100	100	100	100	100	100	100	100	100	100	100	100	100	100	100	100	100	100	100	100	100	100	100	100	100	100	100	100	100	100	100	100	100	100	97.06	100	92.31	96.55	100	100	100
20400	100	100	100	100	100	100	100	100	100	100	100	100	100	100	100	100	100	100	100	100	100	100	100	100	100	100	100	100	100	100	100	100	100	100	100	100	100	100	100	100	100	100	97.06	100	92.31	96.55	100	100	100
20420	100	100	100	100	100	100	100	100	100	100	100	100	100	100	100	100	100	100	100	100	100	100	100	100	100	100	100	100	100	100	100	100	100	100	100	100	100	100	100	100	100	100	97.06	100	92.31	96.55	100	100	100
20440	100	100	100	100	100	100	100	100	100	100	100	100	100	100	100	100	100	100	100	100	100	100	100	100	100	100	100	100	100	100	100	100	100	100	100	100	100	100	100	100	100	100	97.06	100	92.31	96.55	100	100	100
20460	100	100	100	100	100	100	100	100	100	100	100	100	100	100	100	100	100	100	100	100	100	100	100	100	100	100	100	100	100	100	100	100	100	100	100	100	100	100	100	100	100	100	97.06	100	92.31	96.55	100	100	100
20480	100	100	100	100	100	100	100	100	100	100	100	100	100	100	100	100	100	100	100	100	100	100	100	100	100	100	100	100	100	100	100	100	100	100	100	100	100	100	100	100	100	100	97.06	100	92.31	96.55	100	100	100
20500	100	100	100	100	100	100	100	100	100	100	100	100	100	100	100	100	100	100	100	100	100	100	100	100	100	100	100	100	100	100	100	100	100	100	100	100	100	100	100	100	100	100	97.06	100	92.31	96.55	100	100	100
20520	100	100	100	100	100	100	100	100	100	100	100	100	100	100	100	100	100	100	100	100	100	100	100	100	100	100	100	100	100	100	100	100	100	100	100	100	100	100	100	100	100	100	97.06	100	92.31	96.55	100	100	100
20540	100	100	100	100	100	100	100	100	100	100	100	100	100	100	100	100	100	100	100	100	100	100	100	100	100	100	100	100	100	100	100	100	100	100	100	100	100	100	100	100	100	100	97.06	100	92.31	96.55	100	100	100
20560	100	100	100	100	100	100	100	100	100	100	100	100	100	100	100	100	100	100	100	100	100	100	100	100	100	100	100	100	100	100	100	100	100	100	100	100	100	100	100	100	100	100	97.06	100	92.31	96.55	100	100	100
20580	100	100	100	100	100	100	100	100	100	100	100	100	100	100	100	100	100	100	100	100	100	100	100	100	100	100	100	100	100	100	100	100	100	100	100	100	100	100	100	100	100	100	97.06	100	92.31	96.55	100	100	100
20600	100	100	100	100	100	100	100	100	100	100	100	100	100	100	100	100	100	100	100	100	100	100	100	100	100	100	100	100	100	100	100	100	100	100	100	100	100	100	100	100	100	100	97.06	100	92.31	96.55	100	100	100
20620	100	100	100	100	100	100	100	100	100	100	100	100	100	100	100	100	100	100	100	100	100	100	100	100	100	100	100	100	100	100	100	100	100	100	100	100	100	100	100	100	100	100	97.06	100	92.31	96.55	100	100	100
20640	100	100	100	100	100	100	100	100	100	100	100	100	100	100	100	100	100	100	100	100	100	100	100	100	100	100	100	100	100	100	100	100	100	100	100	100	100	100	100	100	100	100	97.06	100	92.31	96.55	100	100	100
20660	100	100	100	100	100	100	100	100	100	100	100	100	100	100	100	100	100	100	100	100	100	100	100	100	100	100	100	100	100	100	100	100	100	100	100	100	100	100	100	100	100	100	97.06	100	92.31	96.55	100	100	100
20680	100	100	100	100	100	100	100	100	100	100	100	100	100	100	100	100	100	100	100	100	100	100	100	100	100	100	100	100	100	100	100	100	100	100	100	100	100	100	100	100	100	100	97.06	100	92.31	96.55	100	100	100
20700	100	100	100	100	100	100	100	100	100	100	100	100	100	100	100	100	100	100	100	100	100	100	100	100	100	100	100	100	100	100	100	100	100	100	100	100	100	100	100	100	100	100	97.06	100	92.31	96.55	100	100	100
20720	100	100	100	100	100	100	100	100	100	100	100	100	100	100	100	100	100	100	100	100	100	100	100	100	100	100	100	100	100	100	100	100	100	100	100	100	100	100	100	100	100	100	97.06	100	92.31	96.55	100	100	100
20740	100	100	100	100	100	100	100	100	100	100	100	100	100	100	100	100	100	100	100	100	100	100	100	100	100	100	100	100	100	100	100	100	100	100	100	100	100	100	100	100	100	100	97.06	100	92.31	96.55	100	100	100
20760	100	100	100	100	100	100	100	100	100	100	100	100	100	100	100	100	100	100	100	100	100	100	100	100	100	100	100	100	100	100	100	100	100	100	100	100	100	100	100	100	100	100	97.06	100	92.31	96.55	100	100	100
20780	100	100	100	100	100	100	100	100	100	100	100	100	100	100	100	100	100	100	100	100	100	100	100	100	100	100	100	100	100	100	100	100	100	100	100	100	100	100	100	100	100	100	97.06	100	92.31	96.55	100	100	100
20800	100	100	100	100	100	100	100	100	100	100	100	100	100	100	100	100	100	100	100	100	100	100	100	100	100	100	100	100	100	100	100	100	100	100	100	100	100	100	100	100	100	100	97.06	100	92.31	96.55	100	100	100
20820	100	100	100	100	100	100	100	100	100	100	100	100	100	100	100	100	100	100	100	100	100	100	100	100	100	100	100	100	100	100	100	100	100	100	100	100	100	100	100	100	100	100	97.06	100	92.31	96.55	100	100	100
20840	100	100	100	100	100	100	100	100	100	100	100	100	100	100	100	100	100	100	100	100	100	100	100	100	100	100	100	100	100	100	100	100	100	100	100	100	100	100	100	100	100	100	97.06	100	92.31	96.55	100	100	100
20860	100	100	100	100	100	100	100	100	100	100	100	100	100	100	100	100	100	100	100	100	100	100	100	100	100	100	100	100	100	100	100	100	100	100	100	100	100	100	100	100	100	100	97.06	100	92.31	96.55	100	100	100
20880	100	100	100	100	100	100	100	100	100	100	100	100	100	100	100	100	100	100	100	100	100	100	100	100	100	100	100	100	100	100	100	100	100	100	100	100	100	100	100	100	100	100	97.06	100	92.31	96.55	100	100	100
20900	100	100	100	100	100	100	100	100	100	100	100	100	100	100	100	100	100	100	100	100	100	100	100	100	100	100	100	100	100	100	100	100	100	100	100	100	100	100	100	100	100	100	97.06	100	92.31	96.55	100	100	100
20920	100	100	100	100	100	100	100	100	100	100	100	100	100	100	100	100	100	100	100	100	100	100	100	100	100	100	100	100	100	100	100	100	100	100	100	100	100	100	100	100	100	100	97.06	100	92.31	96.55	100	100	100
20940	100	100	100	100	100	100	100	100	100	100	100	100	100	100	100	100	100	100	100	100	100	100	100	100	100	100	100	100	100	100	100	100	100	100	100	100	100	100	100	100	100	100	97.06	100	92.31	96.55	100	100	100
20960	100	100	100	100	100	100	100	100	100	100	100	100	100	100	100	100	100	100	100	100	100	100	100	100	100	100	100	100	100	100	100	100	100	100	100	100	100	100	100	100	100	100	97.06	100	92.31	96.55	100	100	100
20980	100	100	100	100	100	100	100	100	100	100	100	100	100	100	100	100	100	100	100	100	100	100	100	100	100	100	100	100	100	100	100	100	100	100	100	100	100	100	100	100	100	100	97.06	100	92.31	96.55	100	100	100
21000	100	100	100	100	100	100	100	100	100	100	100	100	100	100	100	100	100	100	100	100	100	100	100	100	100	100	100	100	100	100	100	100	100	100	100	100	100	100	100	100	100	100	97.06	100	92.31	96.55	100	100	100
21020	100	100	100	100	100	100	100	100	100	100	100	100	100	100	100	100	100	100	100	100	100	100	100	100	100	100	100	100	100	100	100	100	100	100	100	100	100	100	100	100	100	100	97.06	100	92.31	96.55	100	100	100
21040	100	100	100	100	100	100	100	100	100	100	100	100	100	100	100	100	100	100	100	100	100	100	100	100	100	100	100	100	100	100	100	100	100	100	100	100	100	100	100	100	100	100	97.06	100	92.31	96.55	100	100	100
21060	100	100	100	100	100	100	100	100	100	100	100	100	100	100	100	100	100	100	100	100	100	100	100	100	100	100	100	100	100	100	100	100	100	100	100	100	100	100	100	100	100	100	97.06	100	92.31	96.55	100	100	100
21080	100	100	100	100	100	100	100	100	100	100	100	100	100	100	100	100	100	100	100	100	100	100	100	100	100	100	100	100	100	100	100	100	100	100	100	100	100	100	100	100	100	100	97.06	100	92.31	96.55	100	100	100
21100	100	100	100	100	100	100	100	100	100	100	100	100	100	100	100	100	100	100	100	100	100	100	100	100	100	100	100	100	100	100	100	100	100	100	100	100	100	100	100	100	100	100	97.06	100	92.31	96.55	100	100	100
21120	100	100	100	100	100	100	100	100	100	100	100	100	100	100	100	100	100	100	100	100	100	100	100	100	100	100	100	100	100	100	100	100	100	100	100	100	100	100	100	100	100	100	97.06	100	92.31	96.55	100	100	100
21140	100	100	100	100	100	100	100	100	100	100	100	100	100	100	100	100	100	100	100	100	100	100	100	100	100	100	100	100	100	100	100	100	100	100	100	100	100	100	100	100	100	100	97.06	100	92.31	96.55	100	100	100
21160	100	100	100	100	100	100	100	100	100	100	100	100	100	100	100	100	100	100	100	100	100	100	100	100	100	100	100	100	100	100	100	100	100	100	100	100	100	100	100	100	100	100	97.06	100	92.31	96.55	100	100	100
21180	100	100	100	100	100	100	100	100	100	100	100	100	100	100	100	100	100	100	100	100	100	100	100	100	100	100	100	100	100	100	100	100	100	100	100	100	100	100	100	100	100	100	97.06	100	92.31	96.55	100	100	100
21200	100	100	100	100	100	100	100	100	100	100	100	100	100	100	100	100	100	100	100	100	100	100	100	100	100	100	100	100	100	100	100	100	100	100	100	100	100	100	100	100	100	100	97.06	100	92.31	96.55	100	100	100
21220	100	100	100	100	100	100	100	100	100	100	100	100	100	100	100	100	100	100	100	100	100	100	100	100	100	100	100	100	100	100	100	100	100	100	100	100	100	100	100	100	100	100	97.06	100	92.31	96.55	100	100	100
21240	100	100	100	100	100	100	100	100	100	100	100	100	100	100	100	100	100	100	100	100	100	100	100	100	100	100	100	100	100	100	100	100	100	100	100	100	100	100	100	100	100	100	97.06	100	92.31	96.55	100	100	100
21260	100	100	100	100	100	100	100	100	100	100	100	100	100	100	100	100	100	100	100	100	100	100	100	100	100	100	100	100	100	100	100	100	100	100	100	100	100	100	100	100	100	100	97.06	100	92.31	96.55	100	100	100
21280	100	100	100	100	100	100	100	100	100	100	100	100	100	100	100	100	100	100	100	100	100	100	100	100	100	100	100	100	100	100	100	100	100	100	100	100	100	100	100	100	100	100	97.06	100	92.31	96.55	100	100	100
21300	100	100	100	100	100	100	100	100	100	100	100	100	100	100	100	100	100	100	100	100	100	100	100	100	100	100	100	100	100	100	100	100	100	100	100	100	100	100	100	100	100	100	97.06	100	92.31	96.55	100	100	100
21320	100	100	100	100	100	100	100	100	100	100	100	100	100	100	100	100	100	100	100	100	100	100	100	100	100	100	100	100	100	100	100	100	100	100	100	100	100	100	100	100	100	100	97.06	100	92.31	96.55	100	100	100
21340	100	100	100	100	100	100	100	100	100	100	100	100	100	100	100	100	100	100	100	100	100	100	100	100	100	100	100	100	100	100	100	100	100	100	100	100	100	100	100	100	100	100	97.06	100	92.31	96.55	100	100	100
21360	100	100	100	100	100	100	100	100	100	100	100	100	100	100	100	100	100	100	100	100	100	100	100	100	100	100	100	100	100	100	100	100	100	100	100	100	100	100	100	100	100	100	97.06	100	92.31	96.55	100	100	100
21380	100	100	100	100	100	100	100	100	100	100	100	100	100	100	100	100	100	100	100	100	100	100	100	100	100	100	100	100	100	100	100	100	100	100	100	100	100	100	100	100	100	100	97.06	100	92.31	96.55	100	100	100
21400	100	100	100	100	100	100	100	100	100	100	100	100	100	100	100	100	100	100	100	100	100	100	100	100	100	100	100	100	100	100	100	100	100	100	100	100	100	100	100	100	100	100	97.06	100	92.31	96.55	100	100	100
21420	100	100	100	100	100	100	100	100	100	100	100	100	100	100	100	100	100	100	100	100	100	100	100	100	100	100	100	100	100	100	100	100	100	100	100	100	100	100	100	100	100	100	97.06	100	92.31	96.55	100	100	100
21440	100	100	100	100	100	100	100	100	100	100	100	100	100	100	100	100	100	100	100	100	100	100	100	100	100	100	100	100	100	100	100	100	100	100	100	100	100	100	100	100	100	100	97.06	100	92.31	96.55	100	100	100
21460	100	100	100	100	100	100	100	100	100	100	100	100	100	100	100	100	100	100	100	100	100	100	100	100	100	100	100	100	100	100	100	100	100	100	100	100	100	100	100	100	100	100	97.06	100	92.31	96.55	100	100	100
21480	100	100	100	100	100	100	100	100	100	100	100	100	100	100	100	100	100	100	100	100	100	100	100	100	100	100	100	100	100	100	100	100	100	100	100	100	100	100	100	100	100	100	97.06	100	92.31	96.55	100	100	100
21500	100	100	100	100	100	100	100	100	100	100	100	100	100	100	100	100	100	100	100	100	100	100	100	100	100	100	100	100	100	100	100	100	100	100	100	100	100	100	100	100	100	100	97.06	100	92.31	96.55	100	100	100
21520	100	100	100	100	100	100	100	100	100	100	100	100	100	100	100	100	100	100	100	100	100	100	100	100	100	100	100	100	100	100	100	100	100	100	100	100	100	100	100	100	100	100	97.06	100	92.31	96.55	100	100	100
21540	100	100	100	100	100	100	100	100	100	100	100	100	100	100	100	100	100	100	100	100	100	100	100	100	100	100	100	100	100	100	100	100	100	100	100	100	100	100	100	100	100	100	97.06	100	92.31	96.55	100	100	100
21560	100	100	100	100	100	100	100	100	100	100	100	100	100	100	100	100	100	100	100	100	100	100	100	100	100	100	100	100	100	100	100	100	100	100	100	100	100	100	100	100	100	100	97.06	100	92.31	96.55	100	100	100
21580	100	100	100	100	100	100	100	100	100	100	100	100	100	100	100	100	100	100	100	100	100	100	100	100	100	100	100	100	100	100	100	100	100	100	100	100	100	100	100	100	100	100	97.06	100	92.31	96.55	100	100	100
21600	100	100	100	100	100	100	100	100	100	100	100	100	100	100	100	100	100	100	100	100	100	100	100	100	100	100	100	100	100	100	100	100	100	100	100	100	100	100	100	100	100	100	97.06	100	92.31	96.55	100	100	100
21620	100	100	100	100	100	100	100	100	100	100	100	100	100	100	100	100	100	100	100	100	100	100	100	100	100	100	100	100	100	100	100	100	100	100	100	100	100	100	100	100	100	100	97.06	100	92.31	96.55	100	100	100
21640	100	100	100	100	100	100	100	100	100	100	100	100	100	100	100	100	100	100	100	100	100	100	100	100	100	100	100	100	100	100	100	100	100	100	100	100	100	100	100	100	100	100	97.06	100	92.31	96.55	100	100	100
21660	100	100	100	100	100	100	100	100	100	100	100	100	100	100	100	100	100	100	100	100	100	100	100	100	100	100	100	100	100	100	100	100	100	100	100	100	100	100	100	100	100	100	97.06	100	92.31	96.55	100	100	100
21680	100	100	100	100	100	100	100	100	100	100	100	100	100	100	100	100	100	100	100	100	100	100	100	100	100	100	100	100	100	100	100	100	100	100	100	100	100	100	100	100	100	100	97.06	100	92.31	96.55	100	100	100
21700	100	100	100	100	100	100	100	100	100	100	100	100	100	100	100	100	100	100	100	100	100	100	100	100	100	100	100	100	100	100	100	100	100	100	100	100	100	100	100	100	100	100	97.06	100	92.31	96.55	100	100	100
21720	100	100	100	100	100	100	100	100	100	100	100	100	100	100	100	100	100	100	100	100	100	100	100	100	100	100	100	100	100	100	100	100	100	100	100	100	100	100	100	100	100	100	97.06	100	92.31	96.55	100	100	100
21740	100	100	100	100	100	100	100	100	100	100	100	100	100	100	100	100	100	100	100	100	100	100	100	100	100	100	100	100	100	100	100	100	100	100	100	100	100	100	100	100	100	100	97.06	100	92.31	96.55	100	100	100
21760	100	100	100	100	100	100	100	100	100	100	100	100	100	100	100	100	100	100	100	100	100	100	100	100	100	100	100	100	100	100	100	100	100	100	100	100	100	100	100	100	100	100	97.06	100	92.31	96.55	100	100	100
21780	100	100	100	100	100	100	100	100	100	100	100	100	100	100	100	100	100	100	100	100	100	100	100	100	100	100	100	100	100	100	100	100	100	100	100	100	100	100	100	100	100	100	97.06	100	92.31	96.55	100	100	100
21800	100	100	100	100	100	100	100	100	100	100	100	100	100	100	100	100	100	100	100	100	100	100	100	100	100	100	100	100	100	100	100	100	100	100	100	100	100	100	100	100	100	100	97.06	100	92.31	96.55	100	100	100
21820	100	100	100	100	100	100	100	100	100	100	100	100	100	100	100	100	100	100	100	100	100	100	100	100	100	100	100	100	100	100	100	100	100	100	100	100	100	100	100	100	100	100	97.06	100	92.31	96.55	100	100	100
21840	100	100	100	100	100	100	100	100	100	100	100	100	100	100	100	100	100	100	100	100	100	100	100	100	100	100	100	100	100	100	100	100	100	100	100	100	100	100	100	100	100	100	97.06	100	92.31	96.55	100	100	100
21860	100	100	100	100	100	100	100	100	100	100	100	100	100	100	100	100	100	100	100	100	100	100	100	100	100	100	100	100	100	100	100	100	100	100	100	100	100	100	100	100	100	100	97.06	100	92.31	96.55	100	100	100
21880	100	100	100	100	100	100	100	100	100	100	100	100	100	100	100	100	100	100	100	100	100	100	100	100	100	100	100	100	100	100	100	100	100	100	100	100	100	100	100	100	100	100	97.06	100	92.31	96.55	100	100	100
21900	100	100	100	100	100	100	100	100	100	100	100	100	100	100	100	100	100	100	100	100	100	100	100	100	100	100	100	100	100	100	100	100	100	100	100	100	100	100	100	100	100	100	97.06	100	92.31	96.55	100	100	100
21920	100	100	100	100	100	100	100	100	100	100	100	100	100	100	100	100	100	100	100	100	100	100	100	100	100	100	100	100	100	100	100	100	100	100	100	100	100	100	100	100	100	100	97.06	100	92.31	96.55	100	100	100
21940	100	100	100	100	100	100	100	100	100	100	100	100	100	100	100	100	100	100	100	100	100	100	100	100	100	100	100	100	100	100	100	100	100	100	100	100	100	100	100	100	100	100	97.06	100	92.31	96.55	100	100	100
21960	100	100	100	100	100	100	100	100	100	100	100	100	100	100	100	100	100	100	100	100	100	100	100	100	100	100	100	100	100	100	100	100	100	100	100	100	100	100	100	100	100	100	97.06	100	92.31	96.55	100	100	100
21980	100	100	100	100	100	100	100	100	100	100	100	100	100	100	100	100	100	100	100	100	100	100	100	100	100	100	100	100	100	100	100	100	100	100	100	100	100	100	100	100	100	100	97.06	100	92.31	96.55	100	100	100
22000	100	100	100	100	100	100	100	100	100	100	100	100	100	100	100	100	100	100	100	100	100	100	100	100	100	100	100	100	100	100	100	100	100	100	100	100	100	100	100	100	100	100	97.06	100	92.31	96.55	100	100	100
22020	100	100	100	100	100	100	100	100	100	100	100	100	100	100	100	100	100	100	100	100	100	100	100	100	100	100	100	100	100	100	100	100	100	100	100	100	100	100	100	100	100	100	97.06	100	92.31	96.55	100	100	100
22040	100	100	100	100	100	100	100	100	100	100	100	100	100	100	100	100	100	100	100	100	100	100	100	100	100	100	100	100	100	100	100	100	100	100	100	100	100	100	100	100	100	100	97.06	100	92.31	96.55	100	100	100
22060	100	100	100	100	100	100	100	100	100	100	100	100	100	100	100	100	100	100	100	100	100	100	100	100	100	100	100	100	100	100	100	100	100	100	100	100	100	100	100	100	100	100	97.06	100	92.31	96.55	100	100	100
22080	100	100	100	100	100	100	100	100	100	100	100	100	100	100	100	100	100	100	100	100	100	100	100	100	100	100	100	100	100	100	100	100	100	100	100	100	100	100	100	100	100	100	97.06	100	92.31	96.55	100	100	100
22100	100	100	100	100	100	100	100	100	100	100	100	100	100	100	100	100	100	100	100	100	100	100	100	100	100	100	100	100	100	100	100	100	100	100	100	100	100	100	100	100	100	100	97.06	100	92.31	96.55	100	100	100
22120	100	100	100	100	100	100	100	100	100	100	100	100	100	100	100	100	100	100	100	100	100	100	100	100	100	100	100	100	100	100	100	100	100	100	100	100	100	100	100	100	100	100	97.06	100	92.31	96.55	100	100	100
22140	100	100	100	100	100	100	100	100	100	100	100	100	100	100	100	100	100	100	100	100	100	100	100	100	100	100	100	100	100	100	100	100	100	100	100	100	100	100	100	100	100	100	97.06	100	92.31	96.55	100	100	100
22160	100	100	100	100	100	100	100	100	100	100	100	100	100	100	100	100	100	100	100	100	100	100	100	100	100	100	100	100	100	100	100	100	100	100	100	100	100	100	100	100	100	100	97.06	100	92.31	96.55	100	100	100
22180	100	100	100	100	100	100	100	100	100	100	100	100	100	100	100	100	100	100	100	100	100	100	100	100	100	100	100	100	100	100	100	100	100	100	100	100	100	100	100	100	100	100	97.06	100	92.31	96.55	100	100	100
22200	100	100	100	100	100	100	100	100	100	100	100	100	100	100	100	100	100	100	100	100	100	100	100	100	100	100	100	100	100	100	100	100	100	100	100	100	100	100	100	100	100	100	97.06	100	92.31	96.55	100	100	100
22220	100	100	100	100	100	100	100	100	100	100	100	100	100	100	100	100	100	100	100	100	100	100	100	100	100	100	100	100	100	100	100	100	100	100	100	100	100	100	100	100	100	100	97.06	100	92.31	96.55	100	100	100
22240	100	100	100	100	100	100	100	100	100	100	100	100	100	100	100	100	100	100	100	100	100	100	100	100	100	100	100	100	100	100	100	100	100	100	100	100	100	100	100	100	100	100	97.06	100	92.31	96.55	100	100	100
22260	100	100	100	100	100	100	100	100	100	100	100	100	100	100	100	100	100	100	100	100	100	100	100	100	100	100	100	100	100	100	100	100	100	100	100	100	100	100	100	100	100	100	97.06	100	92.31	96.55	100	100	100
22280	100	100	100	100	100	100	100	100	100	100	100	100	100	100	100	100	100	100	100	100	100	100	100	100	100	100	100	100	100	100	100	100	100	100	100	100	100	100	100	100	100	100	97.06	100	92.31	96.55	100	100	100
22300	100	100	100	100	100	100	100	100	100	100	100	100	100	100	100	100	100	100	100	100	100	100	100	100	100	100	100	100	100	100	100	100	100	100	100	100	100	100	100	100	100	100	97.06	100	92.31	96.55	100	100	100
22320	100	100	100	100	100	100	100	100	100	100	100	100	100	100	100	100	100	100	100	100	100	100	100	100	100	100	100	100	100	100	100	100	100	100	100	100	100	100	100	100	100	100	97.06	100	92.31	96.55	100	100	100
22340	100	100	100	100	100	100	100	100	100	100	100	100	100	100	100	100	100	100	100	100	100	100	100	100	100	100	100	100	100	100	100	100	100	100	100	100	100	100	100	100	100	100	97.06	100	92.31	96.55	100	100	100
22360	100	100	100	100	100	100	100	100	100	100	100	100	100	100	100	100	100	100	100	100	100	100	100	100	100	100	100	100	100	100	100	100	100	100	100	100	100	100	100	100	100	100	97.06	100	92.31	96.55	100	100	100
22380	100	100	100	100	100	100	100	100	100	100	100	100	100	100	100	100	100	100	100	100	100	100	100	100	100	100	100	100	100	100	100	100	100	100	100	100	100	100	100	100	100	100	97.06	100	92.31	96.55	100	100	100
22400	100	100	100	100	100	100	100	100	100	100	100	100	100	100	100	100	100	100	100	100	100	100	100	100	100	100	100	100	100	100	100	100	100	100	100	100	100	100	100	100	100	100	97.06	100	92.31	96.55	100	100	100
22420	100	100	100	100	100	100	100	100	100	100	100	100	100	100	100	100	100	100	100	100	100	100	100	100	100	100	100	100	100	100	100	100	100	100	100	100	100	100	100	100	100	100	97.06	100	92.31	96.55	100	100	100
22440	100	100	100	100	100	100	100	100	100	100	100	100	100	100	100	100	100	100	100	100	100	100	100	100	100	100	100	100	100	100	100	100	100	100	100	100	100	100	100	100	100	100	97.06	100	92.31	96.55	100	100	100
22460	100	100	100	100	100	100	100	100	100	100	100	100	100	100	100	100	100	100	100	100	100	100	100	100	100	100	100	100	100	100	100	100	100	100	100	100	100	100	100	100	100	100	97.06	100	92.31	96.55	100	100	100
22480	100	100	100	100	100	100	100	100	100	100	100	100	100	100	100	100	100	100	100	100	100	100	100	100	100	100	100	100	100	100	100	100	100	100	100	100	100	100	100	100	100	100	97.06	100	92.31	96.55	100	100	100
22500	100	100	100	100	100	100	100	100	100	100	100	100	100	100	100	100	100	100	100	100	100	100	100	100	100	100	100	100	100	100	100	100	100	100	100	100	100	100	100	100	100	100	97.06	100	92.31	96.55	100	100	100
22520	100	100	100	100	100	100	100	100	100	100	100	100	100	100	100	100	100	100	100	100	100	100	100	100	100	100	100	100	100	100	100	100	100	100	100	100	100	100	100	100	100	100	97.06	100	92.31	96.55	100	100	100
22540	100	100	100	100	100	100	100	100	100	100	100	100	100	100	100	100	100	100	100	100	100	100	100	100	100	100	100	100	100	100	100	100	100	100	100	100	100	100	100	100	100	100	97.06	100	92.31	96.55	100	100	100
22560	100	100	100	100	100	100	100	100	100	100	100	100	100	100	100	100	100	100	100	100	100	100	100	100	100	100	100	100	100	100	100	100	100	100	100	100	100	100	100	100	100	100	97.06	100	92.31	96.55	100	100	100
22580	100	100	100	100	100	100	100	100	100	100	100	100	100	100	100	100	100	100	100	100	100	100	100	100	100	100	100	100	100	100	100	100	100	100	100	100	100	100	100	100	100	100	97.06	100	92.31	96.55	100	100	100
22600	100	100	100	100	100	100	100	100	100	100	100	100	100	100	100	100	100	100	100	100	100	100	100	100	100	100	100	100	100	100	100	100	100	100	100	100	100	100	100	100	100	100	97.06	100	92.31	96.55	100	100	100
22620	100	100	100	100	100	100	100	100	100	100	100	100	100	100	100	100	100	100	100	100	100	100	100	100	100	100	100	100	100	100	100	100	100	100	100	100	100	100	100	100	100	100	97.06	100	92.31	96.55	100	100	100
22640	100	100	100	100	100	100	100	100	100	100	100	100	100	100	100	100	100	100	100	100	100	100	100	100	100	100	100	100	100	100	100	100	100	100	100	100	100	100	100	100	100	100	97.06	100	92.31	96.55	100	100	100
22660	100	100	100	100	100	100	100	100	100	100	100	100	100	100	100	100	100	100	100	100	100	100	100	100	100	100	100	100	100	100	100	100	100	100	100	100	100	100	100	100	100	100	97.06	100	92.31	96.55	100	100	100
22680	100	100	100	100	100	100	100	100	100	100	100	100	100	100	100	100	100	100	100	100	100	100	100	100	100	100	100	100	100	100	100	100	100	100	100	100	100	100	100	100	100	100	97.06	100	92.31	96.55	100	100	100
22700	100	100	100	100	100	100	100	100	100	100	100	100	100	100	100	100	100	100	100	100	100	100	100	100	100	100	100	100	100	100	100	100	100	100	100	100	100	100	100	100	100	100	97.06	100	92.31	96.55	100	100	100
22720	100	100	100	100	100	100	100	100	100	100	100	100	100	100	100	100	100	100	100	100	100	100	100	100	100	100	100	100	100	100	100	100	100	100	100	100	100	100	100	100	100	100	97.06	100	92.31	96.55	100	100	100
22740	100	100	100	100	100	100	100	100	100	100	100	100	100	100	100	100	100	100	100	100	100	100	100	100	100	100	100	100	100	100	100	100	100	100	100	100	100	100	100	100	100	100	97.06	100	92.31	96.55	100	100	100
22760	100	100	100	100	100	100	100	100	100	100	100	100	100	100	100	100	100	100	100	100	100	100	100	100	100	100	100	100	100	100	100	100	100	100	100	100	100	100	100	100	100	100	97.06	100	92.31	96.55	100	100	100
22780	100	100	100	100	100	100	100	100	100	100	100	100	100	100	100	100	100	100	100	100	100	100	100	100	100	100	100	100	100	100	100	100	100	100	100	100	100	100	100	100	100	100	97.06	100	92.31	96.55	100	100	100
22800	100	100	100	100	100	100	100	100	100	100	100	100	100	100	100	100	100	100	100	100	100	100	100	100	100	100	100	100	100	100	100	100	100	100	100	100	100	100	100	100	100	100	97.06	100	92.31	96.55	100	100	100
22820	100	100	100	100	100	100	100	100	100	100	100	100	100	100	100	100	100	100	100	100	100	100	100	100	100	100	100	100	100	100	100	100	100	100	100	100	100	100	100	100	100	100	97.06	100	92.31	96.55	100	100	100
22840	100	100	100	100	100	100	100	100	100	100	100	100	100	100	100	100	100	100	100	100	100	100	100	100	100	100	100	100	100	100	100	100	100	100	100	100	100	100	100	100	100	100	97.06	100	92.31	96.55	100	100	100
22860	100	100	100	100	100	100	100	100	100	100	100	100	100	100	100	100	100	100	100	100	100	100	100	100	100	100	100	100	100	100	100	100	100	100	100	100	100	100	100	100	100	100	97.06	100	92.31	96.55	100	100	100
22880	100	100	100	100	100	100	100	100	100	100	100	100	100	100	100	100	100	100	100	100	100	100	100	100	100	100	100	100	100	100	100	100	100	100	100	100	100	100	100	100	100	100	97.06	100	92.31	96.55	100	100	100
22900	100	100	100	100	100	100	100	100	100	100	100	100	100	100	100	100	100	100	100	100	100	100	100	100	100	100	100	100	100	100	100	100	100	100	100	100	100	100	100	100	100	100	97.06	100	92.31	96.55	100	100	100
22920	100	100	100	100	100	100	100	100	100	100	100	100	100	100	100	100	100	100	100	100	100	100	100	100	100	100	100	100	100	100	100	100	100	100	100	100	100	100	100	100	100	100	97.06	100	92.31	96.55	100	100	100
22940	100	100	100	100	100	100	100	100	100	100	100	100	100	100	100	100	100	100	100	100	100	100	100	100	100	100	100	100	100	100	100	100	100	100	100	100	100	100	100	100	100	100	97.06	100	92.31	96.55	100	100	100
22960	100	100	100	100	100	100	100	100	100	100	100	100	100	100	100	100	100	100	100	100	100	100	100	100	100	100	100	100	100	100	100	100	100	100	100	100	100	100	100	100	100	100	97.06	100	92.31	96.55	100	100	100
22980	100	100	100	100	100	100	100	100	100	100	100	100	100	100	100	100	100	100	100	100	100	100	100	100	100	100	100	100	100	100	100	100	100	100	100	100	100	100	100	100	100	100	97.06	100	92.31	96.55	100	100	100
23000	100	100	100	100	100	100	100	100	100	100	100	100	100	100	100	100	100	100	100	100	100	100	100	100	100	100	100	100	100	100	100	100	100	100	100	100	100	100	100	100	100	100	97.06	100	92.31	96.55	100	100	100
23020	100	100	100	100	100	100	100	100	100	100	100	100	100	100	100	100	100	100	100	100	100	100	100	100	100	100	100	100	100	100	100	100	100	100	100	100	100	100	100	100	100	100	97.06	100	92.31	96.55	100	100	100
23040	100	100	100	100	100	100	100	100	100	100	100	100	100	100	100	100	100	100	100	100	100	100	100	100	100	100	100	100	100	100	100	100	100	100	100	100	100	100	100	100	100	100	97.06	100	92.31	96.55	100	100	100
23060	100	100	100	100	100	100	100	100	100	100	100	100	100	100	100	100	100	100	100	100	100	100	100	100	100	100	100	100	100	100	100	100	100	100	100	100	100	100	100	100	100	100	97.06	100	92.31	96.55	100	100	100
23080	100	100	100	100	100	100	100	100	100	100	100	100	100	100	100	100	100	100	100	100	100	100	100	100	100	100	100	100	100	100	100	100	100	100	100	100	100	100	100	100	100	100	97.06	100	92.31	96.55	100	100	100
23100	100	100	100	100	100	100	100	100	100	100	100	100	100	100	100	100	100	100	100	100	100	100	100	100	100	100	100	100	100	100	100	100	100	100	100	100	100	100	100	100	100	100	97.06	100	92.31	96.55	100	100	100
23120	100	100	100	100	100	100	100	100	100	100	100	100	100	100	100	100	100	100	100	100	100	100	100	100	100	100	100	100	100	100	100	100	100	100	100	100	100	100	100	100	100	100	97.06	100	92.31	96.55	100	100	100
23140	100	100	100	100	100	100	100	100	100	100	100	100	100	100	100	100	100	100	100	100	100	100	100	100	100	100	100	100	100	100	100	100	100	100	100	100	100	100	100	100	100	100	97.06	100	92.31	96.55	100	100	100
23160	100	100	100	100	100	100	100	100	100	100	100	100	100	100	100	100	100	100	100	100	100	100	100	100	100	100	100	100	100	100	100	100	100	100	100	100	100	100	100	100	100	100	97.06	100	92.31	96.55	100	100	100
23180	100	100	100	100	100	100	100	100	100	100	100	100	100	100	100	100	100	100	100	100	100	100	100	100	100	100	100	100	100	100	100	100	100	100	100	100	100	100	100	100	100	100	97.06	100	92.31	96.55	100	100	100
23200	100	100	100	100	100	100	100	100	100	100	100	100	100	100	100	100	100	100	100	100	100	100	100	100	100	100	100	100	100	100	100	100	100	100	100	100	100	100	100	100	100	100	97.06	100	92.31	96.55	100	100	100
23220	100	100	100	100	100	100	100	100	100	100	100	100	100	100	100	100	100	100	100	100	100	100	100	100	100	100	100	100	100	100	100	100	100	100	100	100	100	100	100	100	100	100	97.06	100	92.31	96.55	100	100	100
23240	100	100	100	100	100	100	100	100	100	100	100	100	100	100	100	100	100	100	100	100	100	100	100	100	100	100	100	100	100	100	100	100	100	100	100	100	100	100	100	100	100	100	97.06	100	92.31	96.55	100	100	100
23260	100	100	100	100	100	100	100	100	100	100	100	100	100	100	100	100	100	100	100	100	100	100	100	100	100	100	100	100	100	100	100	100	100	100	100	100	100	100	100	100	100	100	97.06	100	92.31	96.55	100	100	100
23280	100	100	100	100	100	100	100	100	100	100	100	100	100	100	100	100	100	100	100	100	100	100	100	100	100	100	100	100	100	100	100	100	100	100	100	100	100	100	100	100	100	100	97.06	100	92.31	96.55	100	100	100
23300	100	100	100	100	100	100	100	100	100	100	100	100	100	100	100	100	100	100	100	100	100	100	100	100	100	100	100	100	100	100	100	100	100	100	100	100	100	100	100	100	100	100	97.06	100	92.31	96.55	100	100	100
23320	100	100	100	100	100	100	100	100	100	100	100	100	100	100	100	100	100	100	100	100	100	100	100	100	100	100	100	100	100	100	100	100	100	100	100	100	100	100	100	100	100	100	97.06	100	92.31	96.55	100	100	100
23340	100	100	100	100	100	100	100	100	100	100	100	100	100	100	100	100	100	100	100	100	100	100	100	100	100	100	100	100	100	100	100	100	100	100	100	100	100	100	100	100	100	100	97.06	100	92.31	96.55	100	100	100
23360	100	100	100	100	100	100	100	100	100	100	100	100	100	100	100	100	100	100	100	100	100	100	100	100	100	100	100	100	100	100	100	100	100	100	100	100	100	100	100	100	100	100	97.06	100	92.31	96.55	100	100	100
23380	100	100	100	100	100	100	100	100	100	100	100	100	100	100	100	100	100	100	100	100	100	100	100	100	100	100	100	100	100	100	100	100	100	100	100	100	100	100	100	100	100	100	97.06	100	92.31	96.55	100	100	100
23400	100	100	100	100	100	100	100	100	100	100	100	100	100	100	100	100	100	100	100	100	100	100	100	100	100	100	100	100	100	100	100	100	100	100	100	100	100	100	100	100	100	100	97.06	100	96.15	96.55	100	100	100
23420	100	100	100	100	100	100	100	100	100	100	100	100	100	100	100	100	100	100	100	100	100	100	100	100	100	100	100	100	100	100	100	100	100	100	100	100	100	100	100	100	100	100	97.06	100	96.15	96.55	100	100	100
23440	100	100	100	100	100	100	100	100	100	100	100	100	100	100	100	100	100	100	100	100	100	100	100	100	100	100	100	100	100	100	100	100	100	100	100	100	100	100	100	100	100	100	97.06	100	96.15	96.55	100	100	100
23460	100	100	100	100	100	100	100	100	100	100	100	100	100	100	100	100	100	100	100	100	100	100	100	100	100	100	100	100	100	100	100	100	100	100	100	100	100	100	100	100	100	100	97.06	100	96.15	96.55	100	100	100
23480	100	100	100	100	100	100	100	100	100	100	100	100	100	100	100	100	100	100	100	100	100	100	100	100	100	100	100	100	100	100	100	100	100	100	100	100	100	100	100	100	100	100	97.06	100	96.15	100	100	100	100
23500	100	100	100	100	100	100	100	100	100	100	100	100	100	100	100	100	100	100	100	100	100	100	100	100	100	100	100	100	100	100	100	100	100	100	100	100	100	100	100	100	100	100	97.06	100	96.15	100	100	100	100
23520	100	100	100	100	100	100	100	100	100	100	100	100	100	100	100	100	100	100	100	100	100	100	100	100	100	100	100	100	100	100	100	100	100	100	100	100	100	100	100	100	100	100	97.06	100	96.15	100	100	100	100
23540	100	100	100	100	100	100	100	100	100	100	100	100	100	100	100	100	100	100	100	100	100	100	100	100	100	100	100	100	100	100	100	100	100	100	100	100	100	100	100	100	100	100	97.06	100	96.15	100	100	100	100
23560	100	100	100	100	100	100	100	100	100	100	100	100	100	100	100	100	100	100	100	100	100	100	100	100	100	100	100	100	100	100	100	100	100	100	100	100	100	100	100	100	100	100	97.06	100	96.15	100	100	100	100
23580	100	100	100	100	100	100	100	100	100	100	100	100	100	100	100	100	100	100	100	100	100	100	100	100	100	100	100	100	100	100	100	100	100	100	100	100	100	100	100	100	100	100	97.06	100	96.15	100	100	100	100
23600	100	100	100	100	100	100	100	100	100	100	100	100	100	100	100	100	100	100	100	100	100	100	100	100	100	100	100	100	100	100	100	100	100	100	100	100	100	100	100	100	100	100	97.06	100	96.15	100	100	100	100
23620	100	100	100	100	100	100	100	100	100	100	100	100	100	100	100	100	100	100	100	100	100	100	100	100	100	100	100	100	100	100	100	100	100	100	100	100	100	100	100	100	100	100	97.06	100	96.15	100	100	100	100
23640	100	100	100	100	100	100	100	100	100	100	100	100	100	100	100	100	100	100	100	100	100	100	100	100	100	100	100	100	100	100	100	100	100	100	100	100	100	100	100	100	100	100	97.06	100	96.15	100	100	100	100
23660	100	100	100	100	100	100	100	100	100	100	100	100	100	100	100	100	100	100	100	100	100	100	100	100	100	100	100	100	100	100	100	100	100	100	100	100	100	100	100	100	100	100	97.06	100	96.15	100	100	100	100
23680	100	100	100	100	100	100	100	100	100	100	100	100	100	100	100	100	100	100	100	100	100	100	100	100	100	100	100	100	100	100	100	100	100	100	100	100	100	100	100	100	100	100	97.06	100	96.15	100	100	100	100
23700	100	100	100	100	100	100	100	100	100	100	100	100	100	100	100	100	100	100	100	100	100	100	100	100	100	100	100	100	100	100	100	100	100	100	100	100	100	100	100	100	100	100	97.06	100	96.15	100	100	100	100
23720	100	100	100	100	100	100	100	100	100	100	100	100	100	100	100	100	100	100	100	100	100	100	100	100	100	100	100	100	100	100	100	100	100	100	100	100	100	100	100	100	100	100	97.06	100	96.15	100	100	100	100
23740	100	100	100	100	100	100	100	100	100	100	100	100	100	100	100	100	100	100	100	100	100	100	100	100	100	100	100	100	100	100	100	100	100	100	100	100	100	100	100	100	100	100	97.06	100	96.15	100	100	100	100
23760	100	100	100	100	100	100	100	100	100	100	100	100	100	100	100	100	100	100	100	100	100	100	100	100	100	100	100	100	100	100	100	100	100	100	100	100	100	100	100	100	100	100	97.06	100	96.15	100	100	100	100
23780	100	100	100	100	100	100	100	100	100	100	100	100	100	100	100	100	100	100	100	100	100	100	100	100	100	100	100	100	100	100	100	100	100	100	100	100	100	100	100	100	100	100	97.06	100	96.15	100	100	100	100
23800	100	100	100	100	100	100	100	100	100	100	100	100	100	100	100	100	100	100	100	100	100	100	100	100	100	100	100	100	100	100	100	100	100	100	100	100	100	100	100	100	100	100	97.06	100	96.15	100	100	100	100
23820	100	100	100	100	100	100	100	100	100	100	100	100	100	100	100	100	100	100	100	100	100	100	100	100	100	100	100	100	100	100	100	100	100	100	100	100	100	100	100	100	100	100	97.06	100	96.15	100	100	100	100
23840	100	100	100	100	100	100	100	100	100	100	100	100	100	100	100	100	100	100	100	100	100	100	100	100	100	100	100	100	100	100	100	100	100	100	100	100	100	100	100	100	100	100	97.06	100	96.15	100	100	100	100
23860	100	100	100	100	100	100	100	100	100	100	100	100	100	100	100	100	100	100	100	100	100	100	100	100	100	100	100	100	100	100	100	100	100	100	100	100	100	100	100	100	100	100	97.06	100	96.15	100	100	100	100
23880	100	100	100	100	100	100	100	100	100	100	100	100	100	100	100	100	100	100	100	100	100	100	100	100	100	100	100	100	100	100	100	100	100	100	100	100	100	100	100	100	100	100	97.06	100	96.15	100	100	100	100
23900	100	100	100	100	100	100	100	100	100	100	100	100	100	100	100	100	100	100	100	100	100	100	100	100	100	100	100	100	100	100	100	100	100	100	100	100	100	100	100	100	100	100	97.06	100	96.15	100	100	100	100
23920	100	100	100	100	100	100	100	100	100	100	100	100	100	100	100	100	100	100	100	100	100	100	100	100	100	100	100	100	100	100	100	100	100	100	100	100	100	100	100	100	100	100	97.06	100	96.15	100	100	100	100
23940	100	100	100	100	100	100	100	100	100	100	100	100	100	100	100	100	100	100	100	100	100	100	100	100	100	100	100	100	100	100	100	100	100	100	100	100	100	100	100	100	100	100	97.06	100	96.15	100	100	100	100
23960	100	100	100	100	100	100	100	100	100	100	100	100	100	100	100	100	100	100	100	100	100	100	100	100	100	100	100	100	100	100	100	100	100	100	100	100	100	100	100	100	100	100	97.06	100	96.15	100	100	100	100
23980	100	100	100	100	100	100	100	100	100	100	100	100	100	100	100	100	100	100	100	100	100	100	100	100	100	100	100	100	100	100	100	100	100	100	100	100	100	100	100	100	100	100	97.06	100	96.15	100	100	100	100
24000	100	100	100	100	100	100	100	100	100	100	100	100	100	100	100	100	100	100	100	100	100	100	100	100	100	100	100	100	100	100	100	100	100	100	100	100	100	100	100	100	100	100	97.06	100	96.15	100	100	100	100
24020	100	100	100	100	100	100	100	100	100	100	100	100	100	100	100	100	100	100	100	100	100	100	100	100	100	100	100	100	100	100	100	100	100	100	100	100	100	100	100	100	100	100	97.06	100	96.15	100	100	100	100
24040	100	100	100	100	100	100	100	100	100	100	100	100	100	100	100	100	100	100	100	100	100	100	100	100	100	100	100	100	100	100	100	100	100	100	100	100	100	100	100	100	100	100	97.06	100	96.15	100	100	100	100
24060	100	100	100	100	100	100	100	100	100	100	100	100	100	100	100	100	100	100	100	100	100	100	100	100	100	100	100	100	100	100	100	100	100	100	100	100	100	100	100	100	100	100	97.06	100	96.15	100	100	100	100
24080	100	100	100	100	100	100	100	100	100	100	100	100	100	100	100	100	100	100	100	100	100	100	100	100	100	100	100	100	100	100	100	100	100	100	100	100	100	100	100	100	100	100	97.06	100	96.15	100	100	100	100
24100	100	100	100	100	100	100	100	100	100	100	100	100	100	100	100	100	100	100	100	100	100	100	100	100	100	100	100	100	100	100	100	100	100	100	100	100	100	100	100	100	100	100	97.06	100	96.15	100	100	100	100
24120	100	100	100	100	100	100	100	100	100	100	100	100	100	100	100	100	100	100	100	100	100	100	100	100	100	100	100	100	100	100	100	100	100	100	100	100	100	100	100	100	100	100	97.06	100	96.15	100	100	100	100
24140	100	100	100	100	100	100	100	100	100	100	100	100	100	100	100	100	100	100	100	100	100	100	100	100	100	100	100	100	100	100	100	100	100	100	100	100	100	100	100	100	100	100	97.06	100	96.15	100	100	100	100
24160	100	100	100	100	100	100	100	100	100	100	100	100	100	100	100	100	100	100	100	100	100	100	100	100	100	100	100	100	100	100	100	100	100	100	100	100	100	100	100	100	100	100	97.06	100	96.15	100	100	100	100
24180	100	100	100	100	100	100	100	100	100	100	100	100	100	100	100	100	100	100	100	100	100	100	100	100	100	100	100	100	100	100	100	100	100	100	100	100	100	100	100	100	100	100	97.06	100	96.15	100	100	100	100
24200	100	100	100	100	100	100	100	100	100	100	100	100	100	100	100	100	100	100	100	100	100	100	100	100	100	100	100	100	100	100	100	100	100	100	100	100	100	100	100	100	100	100	97.06	100	96.15	100	100	100	100
24220	100	100	100	100	100	100	100	100	100	100	100	100	100	100	100	100	100	100	100	100	100	100	100	100	100	100	100	100	100	100	100	100	100	100	100	100	100	100	100	100	100	100	97.06	100	96.15	100	100	100	100
24240	100	100	100	100	100	100	100	100	100	100	100	100	100	100	100	100	100	100	100	100	100	100	100	100	100	100	100	100	100	100	100	100	100	100	100	100	100	100	100	100	100	100	97.06	100	96.15	100	100	100	100
24260	100	100	100	100	100	100	100	100	100	100	100	100	100	100	100	100	100	100	100	100	100	100	100	100	100	100	100	100	100	100	100	100	100	100	100	100	100	100	100	100	100	100	97.06	100	96.15	100	100	100	100
24280	100	100	100	100	100	100	100	100	100	100	100	100	100	100	100	100	100	100	100	100	100	100	100	100	100	100	100	100	100	100	100	100	100	100	100	100	100	100	100	100	100	100	97.06	100	96.15	100	100	100	100
24300	100	100	100	100	100	100	100	100	100	100	100	100	100	100	100	100	100	100	100	100	100	100	100	100	100	100	100	100	100	100	100	100	100	100	100	100	100	100	100	100	100	100	97.06	100	96.15	100	100	100	100
24320	100	100	100	100	100	100	100	100	100	100	100	100	100	100	100	100	100	100	100	100	100	100	100	100	100	100	100	100	100	100	100	100	100	100	100	100	100	100	100	100	100	100	97.06	100	96.15	100	100	100	100
24340	100	100	100	100	100	100	100	100	100	100	100	100	100	100	100	100	100	100	100	100	100	100	100	100	100	100	100	100	100	100	100	100	100	100	100	100	100	100	100	100	100	100	97.06	100	96.15	100	100	100	100
24360	100	100	100	100	100	100	100	100	100	100	100	100	100	100	100	100	100	100	100	100	100	100	100	100	100	100	100	100	100	100	100	100	100	100	100	100	100	100	100	100	100	100	97.06	100	96.15	100	100	100	100
24380	100	100	100	100	100	100	100	100	100	100	100	100	100	100	100	100	100	100	100	100	100	100	100	100	100	100	100	100	100	100	100	100	100	100	100	100	100	100	100	100	100	100	97.06	100	96.15	100	100	100	100
24400	100	100	100	100	100	100	100	100	100	100	100	100	100	100	100	100	100	100	100	100	100	100	100	100	100	100	100	100	100	100	100	100	100	100	100	100	100	100	100	100	100	100	97.06	100	96.15	100	100	100	100
24420	100	100	100	100	100	100	100	100	100	100	100	100	100	100	100	100	100	100	100	100	100	100	100	100	100	100	100	100	100	100	100	100	100	100	100	100	100	100	100	100	100	100	97.06	100	96.15	100	100	100	100
24440	100	100	100	100	100	100	100	100	100	100	100	100	100	100	100	100	100	100	100	100	100	100	100	100	100	100	100	100	100	100	100	100	100	100	100	100	100	100	100	100	100	100	97.06	100	96.15	100	100	100	100
24460	100	100	100	100	100	100	100	100	100	100	100	100	100	100	100	100	100	100	100	100	100	100	100	100	100	100	100	100	100	100	100	100	100	100	100	100	100	100	100	100	100	100	97.06	100	96.15	100	100	100	100
24480	100	100	100	100	100	100	100	100	100	100	100	100	100	100	100	100	100	100	100	100	100	100	100	100	100	100	100	100	100	100	100	100	100	100	100	100	100	100	100	100	100	100	97.06	100	96.15	100	100	100	100
24500	100	100	100	100	100	100	100	100	100	100	100	100	100	100	100	100	100	100	100	100	100	100	100	100	100	100	100	100	100	100	100	100	100	100	100	100	100	100	100	100	100	100	97.06	100	96.15	100	100	100	100
24520	100	100	100	100	100	100	100	100	100	100	100	100	100	100	100	100	100	100	100	100	100	100	100	100	100	100	100	100	100	100	100	100	100	100	100	100	100	100	100	100	100	100	97.06	100	96.15	100	100	100	100
24540	100	100	100	100	100	100	100	100	100	100	100	100	100	100	100	100	100	100	100	100	100	100	100	100	100	100	100	100	100	100	100	100	100	100	100	100	100	100	100	100	100	100	97.06	100	96.15	100	100	100	100
24560	100	100	100	100	100	100	100	100	100	100	100	100	100	100	100	100	100	100	100	100	100	100	100	100	100	100	100	100	100	100	100	100	100	100	100	100	100	100	100	100	100	100	97.06	100	96.15	100	100	100	100
24580	100	100	100	100	100	100	100	100	100	100	100	100	100	100	100	100	100	100	100	100	100	100	100	100	100	100	100	100	100	100	100	100	100	100	100	100	100	100	100	100	100	100	97.06	100	96.15	100	100	100	100
24600	100	100	100	100	100	100	100	100	100	100	100	100	100	100	100	100	100	100	100	100	100	100	100	100	100	100	100	100	100	100	100	100	100	100	100	100	100	100	100	100	100	100	97.06	100	96.15	100	100	100	100
24620	100	100	100	100	100	100	100	100	100	100	100	100	100	100	100	100	100	100	100	100	100	100	100	100	100	100	100	100	100	100	100	100	100	100	100	100	100	100	100	100	100	100	97.06	100	96.15	100	100	100	100
24640	100	100	100	100	100	100	100	100	100	100	100	100	100	100	100	100	100	100	100	100	100	100	100	100	100	100	100	100	100	100	100	100	100	100	100	100	100	100	100	100	100	100	97.06	100	96.15	100	100	100	100
24660	100	100	100	100	100	100	100	100	100	100	100	100	100	100	100	100	100	100	100	100	100	100	100	100	100	100	100	100	100	100	100	100	100	100	100	100	100	100	100	100	100	100	97.06	100	96.15	100	100	100	100
24680	100	100	100	100	100	100	100	100	100	100	100	100	100	100	100	100	100	100	100	100	100	100	100	100	100	100	100	100	100	100	100	100	100	100	100	100	100	100	100	100	100	100	97.06	100	96.15	100	100	100	100
24700	100	100	100	100	100	100	100	100	100	100	100	100	100	100	100	100	100	100	100	100	100	100	100	100	100	100	100	100	100	100	100	100	100	100	100	100	100	100	100	100	100	100	97.06	100	96.15	100	100	100	100
24720	100	100	100	100	100	100	100	100	100	100	100	100	100	100	100	100	100	100	100	100	100	100	100	100	100	100	100	100	100	100	100	100	100	100	100	100	100	100	100	100	100	100	97.06	100	96.15	100	100	100	100
24740	100	100	100	100	100	100	100	100	100	100	100	100	100	100	100	100	100	100	100	100	100	100	100	100	100	100	100	100	100	100	100	100	100	100	100	100	100	100	100	100	100	100	97.06	100	96.15	100	100	100	100
24760	100	100	100	100	100	100	100	100	100	100	100	100	100	100	100	100	100	100	100	100	100	100	100	100	100	100	100	100	100	100	100	100	100	100	100	100	100	100	100	100	100	100	97.06	100	96.15	100	100	100	100
24780	100	100	100	100	100	100	100	100	100	100	100	100	100	100	100	100	100	100	100	100	100	100	100	100	100	100	100	100	100	100	100	100	100	100	100	100	100	100	100	100	100	100	97.06	100	96.15	100	100	100	100
24800	100	100	100	100	100	100	100	100	100	100	100	100	100	100	100	100	100	100	100	100	100	100	100	100	100	100	100	100	100	100	100	100	100	100	100	100	100	100	100	100	100	100	97.06	100	96.15	100	100	100	100
24820	100	100	100	100	100	100	100	100	100	100	100	100	100	100	100	100	100	100	100	100	100	100	100	100	100	100	100	100	100	100	100	100	100	100	100	100	100	100	100	100	100	100	97.06	100	96.15	100	100	100	100
24840	100	100	100	100	100	100	100	100	100	100	100	100	100	100	100	100	100	100	100	100	100	100	100	100	100	100	100	100	100	100	100	100	100	100	100	100	100	100	100	100	100	100	97.06	100	96.15	100	100	100	100
24860	100	100	100	100	100	100	100	100	100	100	100	100	100	100	100	100	100	100	100	100	100	100	100	100	100	100	100	100	100	100	100	100	100	100	100	100	100	100	100	100	100	100	97.06	100	96.15	100	100	100	100
24880	100	100	100	100	100	100	100	100	100	100	100	100	100	100	100	100	100	100	100	100	100	100	100	100	100	100	100	100	100	100	100	100	100	100	100	100	100	100	100	100	100	100	97.06	100	96.15	100	100	100	100
24900	100	100	100	100	100	100	100	100	100	100	100	100	100	100	100	100	100	100	100	100	100	100	100	100	100	100	100	100	100	100	100	100	100	100	100	100	100	100	100	100	100	100	97.06	100	96.15	100	100	100	100
24920	100	100	100	100	100	100	100	100	100	100	100	100	100	100	100	100	100	100	100	100	100	100	100	100	100	100	100	100	100	100	100	100	100	100	100	100	100	100	100	100	100	100	97.06	100	96.15	100	100	100	100
24940	100	100	100	100	100	100	100	100	100	100	100	100	100	100	100	100	100	100	100	100	100	100	100	100	100	100	100	100	100	100	100	100	100	100	100	100	100	100	100	100	100	100	97.06	100	96.15	100	100	100	100
24960	100	100	100	100	100	100	100	100	100	100	100	100	100	100	100	100	100	100	100	100	100	100	100	100	100	100	100	100	100	100	100	100	100	100	100	100	100	100	100	100	100	100	97.06	100	96.15	100	100	100	100
24980	100	100	100	100	100	100	100	100	100	100	100	100	100	100	100	100	100	100	100	100	100	100	100	100	100	100	100	100	100	100	100	100	100	100	100	100	100	100	100	100	100	100	97.06	100	96.15	100	100	100	100
25000	100	100	100	100	100	100	100	100	100	100	100	100	100	100	100	100	100	100	100	100	100	100	100	100	100	100	100	100	100	100	100	100	100	100	100	100	100	100	100	100	100	100	97.06	100	96.15	100	100	100	100
25020	100	100	100	100	100	100	100	100	100	100	100	100	100	100	100	100	100	100	100	100	100	100	100	100	100	100	100	100	100	100	100	100	100	100	100	100	100	100	100	100	100	100	97.06	100	96.15	100	100	100	100
25040	100	100	100	100	100	100	100	100	100	100	100	100	100	100	100	100	100	100	100	100	100	100	100	100	100	100	100	100	100	100	100	100	100	100	100	100	100	100	100	100	100	100	97.06	100	96.15	100	100	100	100
25060	100	100	100	100	100	100	100	100	100	100	100	100	100	100	100	100	100	100	100	100	100	100	100	100	100	100	100	100	100	100	100	100	100	100	100	100	100	100	100	100	100	100	97.06	100	96.15	100	100	100	100
25080	100	100	100	100	100	100	100	100	100	100	100	100	100	100	100	100	100	100	100	100	100	100	100	100	100	100	100	100	100	100	100	100	100	100	100	100	100	100	100	100	100	100	97.06	100	96.15	100	100	100	100
25100	100	100	100	100	100	100	100	100	100	100	100	100	100	100	100	100	100	100	100	100	100	100	100	100	100	100	100	100	100	100	100	100	100	100	100	100	100	100	100	100	100	100	97.06	100	96.15	100	100	100	100
25120	100	100	100	100	100	100	100	100	100	100	100	100	100	100	100	100	100	100	100	100	100	100	100	100	100	100	100	100	100	100	100	100	100	100	100	100	100	100	100	100	100	100	97.06	100	96.15	100	100	100	100
25140	100	100	100	100	100	100	100	100	100	100	100	100	100	100	100	100	100	100	100	100	100	100	100	100	100	100	100	100	100	100	100	100	100	100	100	100	100	100	100	100	100	100	97.06	100	96.15	100	100	100	100
25160	100	100	100	100	100	100	100	100	100	100	100	100	100	100	100	100	100	100	100	100	100	100	100	100	100	100	100	100	100	100	100	100	100	100	100	100	100	100	100	100	100	100	97.06	100	96.15	100	100	100	100
25180	100	100	100	100	100	100	100	100	100	100	100	100	100	100	100	100	100	100	100	100	100	100	100	100	100	100	100	100	100	100	100	100	100	100	100	100	100	100	100	100	100	100	97.06	100	96.15	100	100	100	100
25200	100	100	100	100	100	100	100	100	100	100	100	100	100	100	100	100	100	100	100	100	100	100	100	100	100	100	100	100	100	100	100	100	100	100	100	100	100	100	100	100	100	100	97.06	100	96.15	100	100	100	100
25220	100	100	100	100	100	100	100	100	100	100	100	100	100	100	100	100	100	100	100	100	100	100	100	100	100	100	100	100	100	100	100	100	100	100	100	100	100	100	100	100	100	100	97.06	100	96.15	100	100	100	100
25240	100	100	100	100	100	100	100	100	100	100	100	100	100	100	100	100	100	100	100	100	100	100	100	100	100	100	100	100	100	100	100	100	100	100	100	100	100	100	100	100	100	100	97.06	100	96.15	100	100	100	100
25260	100	100	100	100	100	100	100	100	100	100	100	100	100	100	100	100	100	100	100	100	100	100	100	100	100	100	100	100	100	100	100	100	100	100	100	100	100	100	100	100	100	100	97.06	100	96.15	100	100	100	100
25280	100	100	100	100	100	100	100	100	100	100	100	100	100	100	100	100	100	100	100	100	100	100	100	100	100	100	100	100	100	100	100	100	100	100	100	100	100	100	100	100	100	100	97.06	100	96.15	100	100	100	100
25300	100	100	100	100	100	100	100	100	100	100	100	100	100	100	100	100	100	100	100	100	100	100	100	100	100	100	100	100	100	100	100	100	100	100	100	100	100	100	100	100	100	100	97.06	100	96.15	100	100	100	100
25320	100	100	100	100	100	100	100	100	100	100	100	100	100	100	100	100	100	100	100	100	100	100	100	100	100	100	100	100	100	100	100	100	100	100	100	100	100	100	100	100	100	100	97.06	100	96.15	100	100	100	100
25340	100	100	100	100	100	100	100	100	100	100	100	100	100	100	100	100	100	100	100	100	100	100	100	100	100	100	100	100	100	100	100	100	100	100	100	100	100	100	100	100	100	100	97.06	100	96.15	100	100	100	100
25360	100	100	100	100	100	100	100	100	100	100	100	100	100	100	100	100	100	100	100	100	100	100	100	100	100	100	100	100	100	100	100	100	100	100	100	100	100	100	100	100	100	100	97.06	100	96.15	100	100	100	100
25380	100	100	100	100	100	100	100	100	100	100	100	100	100	100	100	100	100	100	100	100	100	100	100	100	100	100	100	100	100	100	100	100	100	100	100	100	100	100	100	100	100	100	97.06	100	96.15	100	100	100	100
25400	100	100	100	100	100	100	100	100	100	100	100	100	100	100	100	100	100	100	100	100	100	100	100	100	100	100	100	100	100	100	100	100	100	100	100	100	100	100	100	100	100	100	97.06	100	96.15	100	100	100	100
25420	100	100	100	100	100	100	100	100	100	100	100	100	100	100	100	100	100	100	100	100	100	100	100	100	100	100	100	100	100	100	100	100	100	100	100	100	100	100	100	100	100	100	97.06	100	96.15	100	100	100	100
25440	100	100	100	100	100	100	100	100	100	100	100	100	100	100	100	100	100	100	100	100	100	100	100	100	100	100	100	100	100	100	100	100	100	100	100	100	100	100	100	100	100	100	97.06	100	96.15	100	100	100	100
25460	100	100	100	100	100	100	100	100	100	100	100	100	100	100	100	100	100	100	100	100	100	100	100	100	100	100	100	100	100	100	100	100	100	100	100	100	100	100	100	100	100	100	97.06	100	96.15	100	100	100	100
25480	100	100	100	100	100	100	100	100	100	100	100	100	100	100	100	100	100	100	100	100	100	100	100	100	100	100	100	100	100	100	100	100	100	100	100	100	100	100	100	100	100	100	97.06	100	96.15	100	100	100	100
25500	100	100	100	100	100	100	100	100	100	100	100	100	100	100	100	100	100	100	100	100	100	100	100	100	100	100	100	100	100	100	100	100	100	100	100	100	100	100	100	100	100	100	97.06	100	96.15	100	100	100	100
25520	100	100	100	100	100	100	100	100	100	100	100	100	100	100	100	100	100	100	100	100	100	100	100	100	100	100	100	100	100	100	100	100	100	100	100	100	100	100	100	100	100	100	97.06	100	96.15	100	100	100	100
25540	100	100	100	100	100	100	100	100	100	100	100	100	100	100	100	100	100	100	100	100	100	100	100	100	100	100	100	100	100	100	100	100	100	100	100	100	100	100	100	100	100	100	97.06	100	96.15	100	100	100	100
25560	100	100	100	100	100	100	100	100	100	100	100	100	100	100	100	100	100	100	100	100	100	100	100	100	100	100	100	100	100	100	100	100	100	100	100	100	100	100	100	100	100	100	97.06	100	96.15	100	100	100	100
25580	100	100	100	100	100	100	100	100	100	100	100	100	100	100	100	100	100	100	100	100	100	100	100	100	100	100	100	100	100	100	100	100	100	100	100	100	100	100	100	100	100	100	97.06	100	96.15	100	100	100	100
25600	100	100	100	100	100	100	100	100	100	100	100	100	100	100	100	100	100	100	100	100	100	100	100	100	100	100	100	100	100	100	100	100	100	100	100	100	100	100	100	100	100	100	97.06	100	96.15	100	100	100	100
25620	100	100	100	100	100	100	100	100	100	100	100	100	100	100	100	100	100	100	100	100	100	100	100	100	100	100	100	100	100	100	100	100	100	100	100	100	100	100	100	100	100	100	97.06	100	96.15	100	100	100	100
25640	100	100	100	100	100	100	100	100	100	100	100	100	100	100	100	100	100	100	100	100	100	100	100	100	100	100	100	100	100	100	100	100	100	100	100	100	100	100	100	100	100	100	97.06	100	96.15	100	100	100	100
25660	100	100	100	100	100	100	100	100	100	100	100	100	100	100	100	100	100	100	100	100	100	100	100	100	100	100	100	100	100	100	100	100	100	100	100	100	100	100	100	100	100	100	97.06	100	96.15	100	100	100	100
25680	100	100	100	100	100	100	100	100	100	100	100	100	100	100	100	100	100	100	100	100	100	100	100	100	100	100	100	100	100	100	100	100	100	100	100	100	100	100	100	100	100	100	97.06	100	96.15	100	100	100	100
25700	100	100	100	100	100	100	100	100	100	100	100	100	100	100	100	100	100	100	100	100	100	100	100	100	100	100	100	100	100	100	100	100	100	100	100	100	100	100	100	100	100	100	97.06	100	96.15	100	100	100	100
25720	100	100	100	100	100	100	100	100	100	100	100	100	100	100	100	100	100	100	100	100	100	100	100	100	100	100	100	100	100	100	100	100	100	100	100	100	100	100	100	100	100	100	97.06	100	96.15	100	100	100	100
25740	100	100	100	100	100	100	100	100	100	100	100	100	100	100	100	100	100	100	100	100	100	100	100	100	100	100	100	100	100	100	100	100	100	100	100	100	100	100	100	100	100	100	97.06	100	96.15	100	100	100	100
25760	100	100	100	100	100	100	100	100	100	100	100	100	100	100	100	100	100	100	100	100	100	100	100	100	100	100	100	100	100	100	100	100	100	100	100	100	100	100	100	100	100	100	97.06	100	96.15	100	100	100	100
25780	100	100	100	100	100	100	100	100	100	100	100	100	100	100	100	100	100	100	100	100	100	100	100	100	100	100	100	100	100	100	100	100	100	100	100	100	100	100	100	100	100	100	97.06	100	96.15	100	100	100	100
25800	100	100	100	100	100	100	100	100	100	100	100	100	100	100	100	100	100	100	100	100	100	100	100	100	100	100	100	100	100	100	100	100	100	100	100	100	100	100	100	100	100	100	97.06	100	96.15	100	100	100	100
25820	100	100	100	100	100	100	100	100	100	100	100	100	100	100	100	100	100	100	100	100	100	100	100	100	100	100	100	100	100	100	100	100	100	100	100	100	100	100	100	100	100	100	97.06	100	96.15	100	100	100	100
25840	100	100	100	100	100	100	100	100	100	100	100	100	100	100	100	100	100	100	100	100	100	100	100	100	100	100	100	100	100	100	100	100	100	100	100	100	100	100	100	100	100	100	97.06	100	96.15	100	100	100	100
25860	100	100	100	100	100	100	100	100	100	100	100	100	100	100	100	100	100	100	100	100	100	100	100	100	100	100	100	100	100	100	100	100	100	100	100	100	100	100	100	100	100	100	97.06	100	96.15	100	100	100	100
25880	100	100	100	100	100	100	100	100	100	100	100	100	100	100	100	100	100	100	100	100	100	100	100	100	100	100	100	100	100	100	100	100	100	100	100	100	100	100	100	100	100	100	97.06	100	96.15	100	100	100	100
25900	100	100	100	100	100	100	100	100	100	100	100	100	100	100	100	100	100	100	100	100	100	100	100	100	100	100	100	100	100	100	100	100	100	100	100	100	100	100	100	100	100	100	97.06	100	96.15	100	100	100	100
25920	100	100	100	100	100	100	100	100	100	100	100	100	100	100	100	100	100	100	100	100	100	100	100	100	100	100	100	100	100	100	100	100	100	100	100	100	100	100	100	100	100	100	97.06	100	96.15	100	100	100	100
25940	100	100	100	100	100	100	100	100	100	100	100	100	100	100	100	100	100	100	100	100	100	100	100	100	100	100	100	100	100	100	100	100	100	100	100	100	100	100	100	100	100	100	97.06	100	96.15	100	100	100	100
25960	100	100	100	100	100	100	100	100	100	100	100	100	100	100	100	100	100	100	100	100	100	100	100	100	100	100	100	100	100	100	100	100	100	100	100	100	100	100	100	100	100	100	97.06	100	96.15	100	100	100	100
25980	100	100	100	100	100	100	100	100	100	100	100	100	100	100	100	100	100	100	100	100	100	100	100	100	100	100	100	100	100	100	100	100	100	100	100	100	100	100	100	100	100	100	97.06	100	96.15	100	100	100	100
26000	100	100	100	100	100	100	100	100	100	100	100	100	100	100	100	100	100	100	100	100	100	100	100	100	100	100	100	100	100	100	100	100	100	100	100	100	100	100	100	100	100	100	97.06	100	96.15	100	100	100	100
26020	100	100	100	100	100	100	100	100	100	100	100	100	100	100	100	100	100	100	100	100	100	100	100	100	100	100	100	100	100	100	100	100	100	100	100	100	100	100	100	100	100	100	97.06	100	96.15	100	100	100	100
26040	100	100	100	100	100	100	100	100	100	100	100	100	100	100	100	100	100	100	100	100	100	100	100	100	100	100	100	100	100	100	100	100	100	100	100	100	100	100	100	100	100	100	97.06	100	96.15	100	100	100	100
26060	100	100	100	100	100	100	100	100	100	100	100	100	100	100	100	100	100	100	100	100	100	100	100	100	100	100	100	100	100	100	100	100	100	100	100	100	100	100	100	100	100	100	97.06	100	96.15	100	100	100	100
26080	100	100	100	100	100	100	100	100	100	100	100	100	100	100	100	100	100	100	100	100	100	100	100	100	100	100	100	100	100	100	100	100	100	100	100	100	100	100	100	100	100	100	97.06	100	96.15	100	100	100	100
26100	100	100	100	100	100	100	100	100	100	100	100	100	100	100	100	100	100	100	100	100	100	100	100	100	100	100	100	100	100	100	100	100	100	100	100	100	100	100	100	100	100	100	97.06	100	96.15	100	100	100	100
26120	100	100	100	100	100	100	100	100	100	100	100	100	100	100	100	100	100	100	100	100	100	100	100	100	100	100	100	100	100	100	100	100	100	100	100	100	100	100	100	100	100	100	97.06	100	96.15	100	100	100	100
26140	100	100	100	100	100	100	100	100	100	100	100	100	100	100	100	100	100	100	100	100	100	100	100	100	100	100	100	100	100	100	100	100	100	100	100	100	100	100	100	100	100	100	97.06	100	96.15	100	100	100	100
26160	100	100	100	100	100	100	100	100	100	100	100	100	100	100	100	100	100	100	100	100	100	100	100	100	100	100	100	100	100	100	100	100	100	100	100	100	100	100	100	100	100	100	97.06	100	96.15	100	100	100	100
26180	100	100	100	100	100	100	100	100	100	100	100	100	100	100	100	100	100	100	100	100	100	100	100	100	100	100	100	100	100	100	100	100	100	100	100	100	100	100	100	100	100	100	97.06	100	96.15	100	100	100	100
26200	100	100	100	100	100	100	100	100	100	100	100	100	100	100	100	100	100	100	100	100	100	100	100	100	100	100	100	100	100	100	100	100	100	100	100	100	100	100	100	100	100	100	97.06	100	96.15	100	100	100	100
26220	100	100	100	100	100	100	100	100	100	100	100	100	100	100	100	100	100	100	100	100	100	100	100	100	100	100	100	100	100	100	100	100	100	100	100	100	100	100	100	100	100	100	97.06	100	96.15	100	100	100	100
26240	100	100	100	100	100	100	100	100	100	100	100	100	100	100	100	100	100	100	100	100	100	100	100	100	100	100	100	100	100	100	100	100	100	100	100	100	100	100	100	100	100	100	97.06	100	96.15	100	100	100	100
26260	100	100	100	100	100	100	100	100	100	100	100	100	100	100	100	100	100	100	100	100	100	100	100	100	100	100	100	100	100	100	100	100	100	100	100	100	100	100	100	100	100	100	97.06	100	96.15	100	100	100	100
26280	100	100	100	100	100	100	100	100	100	100	100	100	100	100	100	100	100	100	100	100	100	100	100	100	100	100	100	100	100	100	100	100	100	100	100	100	100	100	100	100	100	100	97.06	100	96.15	100	100	100	100
26300	100	100	100	100	100	100	100	100	100	100	100	100	100	100	100	100	100	100	100	100	100	100	100	100	100	100	100	100	100	100	100	100	100	100	100	100	100	100	100	100	100	100	97.06	100	96.15	100	100	100	100
26320	100	100	100	100	100	100	100	100	100	100	100	100	100	100	100	100	100	100	100	100	100	100	100	100	100	100	100	100	100	100	100	100	100	100	100	100	100	100	100	100	100	100	97.06	100	96.15	100	100	100	100
26340	100	100	100	100	100	100	100	100	100	100	100	100	100	100	100	100	100	100	100	100	100	100	100	100	100	100	100	100	100	100	100	100	100	100	100	100	100	100	100	100	100	100	97.06	100	96.15	100	100	100	100
26360	100	100	100	100	100	100	100	100	100	100	100	100	100	100	100	100	100	100	100	100	100	100	100	100	100	100	100	100	100	100	100	100	100	100	100	100	100	100	100	100	100	100	97.06	100	96.15	100	100	100	100
26380	100	100	100	100	100	100	100	100	100	100	100	100	100	100	100	100	100	100	100	100	100	100	100	100	100	100	100	100	100	100	100	100	100	100	100	100	100	100	100	100	100	100	97.06	100	96.15	100	100	100	100
26400	100	100	100	100	100	100	100	100	100	100	100	100	100	100	100	100	100	100	100	100	100	100	100	100	100	100	100	100	100	100	100	100	100	100	100	100	100	100	100	100	100	100	97.06	100	96.15	100	100	100	100
26420	100	100	100	100	100	100	100	100	100	100	100	100	100	100	100	100	100	100	100	100	100	100	100	100	100	100	100	100	100	100	100	100	100	100	100	100	100	100	100	100	100	100	97.06	100	96.15	100	100	100	100
26440	100	100	100	100	100	100	100	100	100	100	100	100	100	100	100	100	100	100	100	100	100	100	100	100	100	100	100	100	100	100	100	100	100	100	100	100	100	100	100	100	100	100	97.06	100	96.15	100	100	100	100
26460	100	100	100	100	100	100	100	100	100	100	100	100	100	100	100	100	100	100	100	100	100	100	100	100	100	100	100	100	100	100	100	100	100	100	100	100	100	100	100	100	100	100	97.06	100	96.15	100	100	100	100
26480	100	100	100	100	100	100	100	100	100	100	100	100	100	100	100	100	100	100	100	100	100	100	100	100	100	100	100	100	100	100	100	100	100	100	100	100	100	100	100	100	100	100	97.06	100	96.15	100	100	100	100
26500	100	100	100	100	100	100	100	100	100	100	100	100	100	100	100	100	100	100	100	100	100	100	100	100	100	100	100	100	100	100	100	100	100	100	100	100	100	100	100	100	100	100	97.06	100	96.15	100	100	100	100
26520	100	100	100	100	100	100	100	100	100	100	100	100	100	100	100	100	100	100	100	100	100	100	100	100	100	100	100	100	100	100	100	100	100	100	100	100	100	100	100	100	100	100	97.06	100	96.15	100	100	100	100
26540	100	100	100	100	100	100	100	100	100	100	100	100	100	100	100	100	100	100	100	100	100	100	100	100	100	100	100	100	100	100	100	100	100	100	100	100	100	100	100	100	100	100	97.06	100	96.15	100	100	100	100
26560	100	100	100	100	100	100	100	100	100	100	100	100	100	100	100	100	100	100	100	100	100	100	100	100	100	100	100	100	100	100	100	100	100	100	100	100	100	100	100	100	100	100	97.06	100	96.15	100	100	100	100
26580	100	100	100	100	100	100	100	100	100	100	100	100	100	100	100	100	100	100	100	100	100	100	100	100	100	100	100	100	100	100	100	100	100	100	100	100	100	100	100	100	100	100	97.06	100	96.15	100	100	100	100
26600	100	100	100	100	100	100	100	100	100	100	100	100	100	100	100	100	100	100	100	100	100	100	100	100	100	100	100	100	100	100	100	100	100	100	100	100	100	100	100	100	100	100	97.06	100	96.15	100	100	100	100
26620	100	100	100	100	100	100	100	100	100	100	100	100	100	100	100	100	100	100	100	100	100	100	100	100	100	100	100	100	100	100	100	100	100	100	100	100	100	100	100	100	100	100	97.06	100	96.15	100	100	100	100
26640	100	100	100	100	100	100	100	100	100	100	100	100	100	100	100	100	100	100	100	100	100	100	100	100	100	100	100	100	100	100	100	100	100	100	100	100	100	100	100	100	100	100	97.06	100	96.15	100	100	100	100
26660	100	100	100	100	100	100	100	100	100	100	100	100	100	100	100	100	100	100	100	100	100	100	100	100	100	100	100	100	100	100	100	100	100	100	100	100	100	100	100	100	100	100	97.06	100	96.15	100	100	100	100
26680	100	100	100	100	100	100	100	100	100	100	100	100	100	100	100	100	100	100	100	100	100	100	100	100	100	100	100	100	100	100	100	100	100	100	100	100	100	100	100	100	100	100	97.06	100	96.15	100	100	100	100
26700	100	100	100	100	100	100	100	100	100	100	100	100	100	100	100	100	100	100	100	100	100	100	100	100	100	100	100	100	100	100	100	100	100	100	100	100	100	100	100	100	100	100	97.06	100	96.15	100	100	100	100
26720	100	100	100	100	100	100	100	100	100	100	100	100	100	100	100	100	100	100	100	100	100	100	100	100	100	100	100	100	100	100	100	100	100	100	100	100	100	100	100	100	100	100	97.06	100	96.15	100	100	100	100
26740	100	100	100	100	100	100	100	100	100	100	100	100	100	100	100	100	100	100	100	100	100	100	100	100	100	100	100	100	100	100	100	100	100	100	100	100	100	100	100	100	100	100	97.06	100	96.15	100	100	100	100
26760	100	100	100	100	100	100	100	100	100	100	100	100	100	100	100	100	100	100	100	100	100	100	100	100	100	100	100	100	100	100	100	100	100	100	100	100	100	100	100	100	100	100	97.06	100	96.15	100	100	100	100
26780	100	100	100	100	100	100	100	100	100	100	100	100	100	100	100	100	100	100	100	100	100	100	100	100	100	100	100	100	100	100	100	100	100	100	100	100	100	100	100	100	100	100	97.06	100	96.15	100	100	100	100
26800	100	100	100	100	100	100	100	100	100	100	100	100	100	100	100	100	100	100	100	100	100	100	100	100	100	100	100	100	100	100	100	100	100	100	100	100	100	100	100	100	100	100	97.06	100	96.15	100	100	100	100
26820	100	100	100	100	100	100	100	100	100	100	100	100	100	100	100	100	100	100	100	100	100	100	100	100	100	100	100	100	100	100	100	100	100	100	100	100	100	100	100	100	100	100	97.06	100	96.15	100	100	100	100
26840	100	100	100	100	100	100	100	100	100	100	100	100	100	100	100	100	100	100	100	100	100	100	100	100	100	100	100	100	100	100	100	100	100	100	100	100	100	100	100	100	100	100	97.06	100	96.15	100	100	100	100
26860	100	100	100	100	100	100	100	100	100	100	100	100	100	100	100	100	100	100	100	100	100	100	100	100	100	100	100	100	100	100	100	100	100	100	100	100	100	100	100	100	100	100	97.06	100	96.15	100	100	100	100
26880	100	100	100	100	100	100	100	100	100	100	100	100	100	100	100	100	100	100	100	100	100	100	100	100	100	100	100	100	100	100	100	100	100	100	100	100	100	100	100	100	100	100	97.06	100	96.15	100	100	100	100
26900	100	100	100	100	100	100	100	100	100	100	100	100	100	100	100	100	100	100	100	100	100	100	100	100	100	100	100	100	100	100	100	100	100	100	100	100	100	100	100	100	100	100	97.06	100	96.15	100	100	100	100
26920	100	100	100	100	100	100	100	100	100	100	100	100	100	100	100	100	100	100	100	100	100	100	100	100	100	100	100	100	100	100	100	100	100	100	100	100	100	100	100	100	100	100	97.06	100	96.15	100	100	100	100
26940	100	100	100	100	100	100	100	100	100	100	100	100	100	100	100	100	100	100	100	100	100	100	100	100	100	100	100	100	100	100	100	100	100	100	100	100	100	100	100	100	100	100	97.06	100	96.15	100	100	100	100
26960	100	100	100	100	100	100	100	100	100	100	100	100	100	100	100	100	100	100	100	100	100	100	100	100	100	100	100	100	100	100	100	100	100	100	100	100	100	100	100	100	100	100	97.06	100	96.15	100	100	100	100
26980	100	100	100	100	100	100	100	100	100	100	100	100	100	100	100	100	100	100	100	100	100	100	100	100	100	100	100	100	100	100	100	100	100	100	100	100	100	100	100	100	100	100	97.06	100	96.15	100	100	100	100
27000	100	100	100	100	100	100	100	100	100	100	100	100	100	100	100	100	100	100	100	100	100	100	100	100	100	100	100	100	100	100	100	100	100	100	100	100	100	100	100	100	100	100	97.06	100	96.15	100	100	100	100
27020	100	100	100	100	100	100	100	100	100	100	100	100	100	100	100	100	100	100	100	100	100	100	100	100	100	100	100	100	100	100	100	100	100	100	100	100	100	100	100	100	100	100	97.06	100	96.15	100	100	100	100
27040	100	100	100	100	100	100	100	100	100	100	100	100	100	100	100	100	100	100	100	100	100	100	100	100	100	100	100	100	100	100	100	100	100	100	100	100	100	100	100	100	100	100	97.06	100	96.15	100	100	100	100
27060	100	100	100	100	100	100	100	100	100	100	100	100	100	100	100	100	100	100	100	100	100	100	100	100	100	100	100	100	100	100	100	100	100	100	100	100	100	100	100	100	100	100	97.06	100	96.15	100	100	100	100
27080	100	100	100	100	100	100	100	100	100	100	100	100	100	100	100	100	100	100	100	100	100	100	100	100	100	100	100	100	100	100	100	100	100	100	100	100	100	100	100	100	100	100	97.06	100	96.15	100	100	100	100
27100	100	100	100	100	100	100	100	100	100	100	100	100	100	100	100	100	100	100	100	100	100	100	100	100	100	100	100	100	100	100	100	100	100	100	100	100	100	100	100	100	100	100	97.06	100	96.15	100	100	100	100
27120	100	100	100	100	100	100	100	100	100	100	100	100	100	100	100	100	100	100	100	100	100	100	100	100	100	100	100	100	100	100	100	100	100	100	100	100	100	100	100	100	100	100	97.06	100	96.15	100	100	100	100
27140	100	100	100	100	100	100	100	100	100	100	100	100	100	100	100	100	100	100	100	100	100	100	100	100	100	100	100	100	100	100	100	100	100	100	100	100	100	100	100	100	100	100	97.06	100	96.15	100	100	100	100
27160	100	100	100	100	100	100	100	100	100	100	100	100	100	100	100	100	100	100	100	100	100	100	100	100	100	100	100	100	100	100	100	100	100	100	100	100	100	100	100	100	100	100	97.06	100	96.15	100	100	100	100
27180	100	100	100	100	100	100	100	100	100	100	100	100	100	100	100	100	100	100	100	100	100	100	100	100	100	100	100	100	100	100	100	100	100	100	100	100	100	100	100	100	100	100	97.06	100	96.15	100	100	100	100
27200	100	100	100	100	100	100	100	100	100	100	100	100	100	100	100	100	100	100	100	100	100	100	100	100	100	100	100	100	100	100	100	100	100	100	100	100	100	100	100	100	100	100	97.06	100	96.15	100	100	100	100
27220	100	100	100	100	100	100	100	100	100	100	100	100	100	100	100	100	100	100	100	100	100	100	100	100	100	100	100	100	100	100	100	100	100	100	100	100	100	100	100	100	100	100	97.06	100	96.15	100	100	100	100
27240	100	100	100	100	100	100	100	100	100	100	100	100	100	100	100	100	100	100	100	100	100	100	100	100	100	100	100	100	100	100	100	100	100	100	100	100	100	100	100	100	100	100	97.06	100	96.15	100	100	100	100
27260	100	100	100	100	100	100	100	100	100	100	100	100	100	100	100	100	100	100	100	100	100	100	100	100	100	100	100	100	100	100	100	100	100	100	100	100	100	100	100	100	100	100	97.06	100	96.15	100	100	100	100
27280	100	100	100	100	100	100	100	100	100	100	100	100	100	100	100	100	100	100	100	100	100	100	100	100	100	100	100	100	100	100	100	100	100	100	100	100	100	100	100	100	100	100	97.06	100	96.15	100	100	100	100
27300	100	100	100	100	100	100	100	100	100	100	100	100	100	100	100	100	100	100	100	100	100	100	100	100	100	100	100	100	100	100	100	100	100	100	100	100	100	100	100	100	100	100	97.06	100	96.15	100	100	100	100
27320	100	100	100	100	100	100	100	100	100	100	100	100	100	100	100	100	100	100	100	100	100	100	100	100	100	100	100	100	100	100	100	100	100	100	100	100	100	100	100	100	100	100	97.06	100	96.15	100	100	100	100
27340	100	100	100	100	100	100	100	100	100	100	100	100	100	100	100	100	100	100	100	100	100	100	100	100	100	100	100	100	100	100	100	100	100	100	100	100	100	100	100	100	100	100	97.06	100	96.15	100	100	100	100
27360	100	100	100	100	100	100	100	100	100	100	100	100	100	100	100	100	100	100	100	100	100	100	100	100	100	100	100	100	100	100	100	100	100	100	100	100	100	100	100	100	100	100	97.06	100	96.15	100	100	100	100
27380	100	100	100	100	100	100	100	100	100	100	100	100	100	100	100	100	100	100	100	100	100	100	100	100	100	100	100	100	100	100	100	100	100	100	100	100	100	100	100	100	100	100	97.06	100	96.15	100	100	100	100
27400	100	100	100	100	100	100	100	100	100	100	100	100	100	100	100	100	100	100	100	100	100	100	100	100	100	100	100	100	100	100	100	100	100	100	100	100	100	100	100	100	100	100	97.06	100	96.15	100	100	100	100
27420	100	100	100	100	100	100	100	100	100	100	100	100	100	100	100	100	100	100	100	100	100	100	100	100	100	100	100	100	100	100	100	100	100	100	100	100	100	100	100	100	100	100	97.06	100	96.15	100	100	100	100
27440	100	100	100	100	100	100	100	100	100	100	100	100	100	100	100	100	100	100	100	100	100	100	100	100	100	100	100	100	100	100	100	100	100	100	100	100	100	100	100	100	100	100	97.06	100	96.15	100	100	100	100
27460	100	100	100	100	100	100	100	100	100	100	100	100	100	100	100	100	100	100	100	100	100	100	100	100	100	100	100	100	100	100	100	100	100	100	100	100	100	100	100	100	100	100	97.06	100	96.15	100	100	100	100
27480	100	100	100	100	100	100	100	100	100	100	100	100	100	100	100	100	100	100	100	100	100	100	100	100	100	100	100	100	100	100	100	100	100	100	100	100	100	100	100	100	100	100	97.06	100	96.15	100	100	100	100
27500	100	100	100	100	100	100	100	100	100	100	100	100	100	100	100	100	100	100	100	100	100	100	100	100	100	100	100	100	100	100	100	100	100	100	100	100	100	100	100	100	100	100	97.06	100	96.15	100	100	100	100
27520	100	100	100	100	100	100	100	100	100	100	100	100	100	100	100	100	100	100	100	100	100	100	100	100	100	100	100	100	100	100	100	100	100	100	100	100	100	100	100	100	100	100	97.06	100	96.15	100	100	100	100
27540	100	100	100	100	100	100	100	100	100	100	100	100	100	100	100	100	100	100	100	100	100	100	100	100	100	100	100	100	100	100	100	100	100	100	100	100	100	100	100	100	100	100	97.06	100	96.15	100	100	100	100
27560	100	100	100	100	100	100	100	100	100	100	100	100	100	100	100	100	100	100	100	100	100	100	100	100	100	100	100	100	100	100	100	100	100	100	100	100	100	100	100	100	100	100	97.06	100	96.15	100	100	100	100
27580	100	100	100	100	100	100	100	100	100	100	100	100	100	100	100	100	100	100	100	100	100	100	100	100	100	100	100	100	100	100	100	100	100	100	100	100	100	100	100	100	100	100	97.06	100	96.15	100	100	100	100
27600	100	100	100	100	100	100	100	100	100	100	100	100	100	100	100	100	100	100	100	100	100	100	100	100	100	100	100	100	100	100	100	100	100	100	100	100	100	100	100	100	100	100	97.06	100	96.15	100	100	100	100
27620	100	100	100	100	100	100	100	100	100	100	100	100	100	100	100	100	100	100	100	100	100	100	100	100	100	100	100	100	100	100	100	100	100	100	100	100	100	100	100	100	100	100	97.06	100	96.15	100	100	100	100
27640	100	100	100	100	100	100	100	100	100	100	100	100	100	100	100	100	100	100	100	100	100	100	100	100	100	100	100	100	100	100	100	100	100	100	100	100	100	100	100	100	100	100	97.06	100	96.15	100	100	100	100
27660	100	100	100	100	100	100	100	100	100	100	100	100	100	100	100	100	100	100	100	100	100	100	100	100	100	100	100	100	100	100	100	100	100	100	100	100	100	100	100	100	100	100	97.06	100	96.15	100	100	100	100
27680	100	100	100	100	100	100	100	100	100	100	100	100	100	100	100	100	100	100	100	100	100	100	100	100	100	100	100	100	100	100	100	100	100	100	100	100	100	100	100	100	100	100	97.06	100	96.15	100	100	100	100
27700	100	100	100	100	100	100	100	100	100	100	100	100	100	100	100	100	100	100	100	100	100	100	100	100	100	100	100	100	100	100	100	100	100	100	100	100	100	100	100	100	100	100	97.06	100	96.15	100	100	100	100
27720	100	100	100	100	100	100	100	100	100	100	100	100	100	100	100	100	100	100	100	100	100	100	100	100	100	100	100	100	100	100	100	100	100	100	100	100	100	100	100	100	100	100	97.06	100	96.15	100	100	100	100
27740	100	100	100	100	100	100	100	100	100	100	100	100	100	100	100	100	100	100	100	100	100	100	100	100	100	100	100	100	100	100	100	100	100	100	100	100	100	100	100	100	100	100	97.06	100	96.15	100	100	100	100
27760	100	100	100	100	100	100	100	100	100	100	100	100	100	100	100	100	100	100	100	100	100	100	100	100	100	100	100	100	100	100	100	100	100	100	100	100	100	100	100	100	100	100	97.06	100	96.15	100	100	100	100
27780	100	100	100	100	100	100	100	100	100	100	100	100	100	100	100	100	100	100	100	100	100	100	100	100	100	100	100	100	100	100	100	100	100	100	100	100	100	100	100	100	100	100	97.06	100	96.15	100	100	100	100
27800	100	100	100	100	100	100	100	100	100	100	100	100	100	100	100	100	100	100	100	100	100	100	100	100	100	100	100	100	100	100	100	100	100	100	100	100	100	100	100	100	100	100	97.06	100	96.15	100	100	100	100
27820	100	100	100	100	100	100	100	100	100	100	100	100	100	100	100	100	100	100	100	100	100	100	100	100	100	100	100	100	100	100	100	100	100	100	100	100	100	100	100	100	100	100	97.06	100	96.15	100	100	100	100
27840	100	100	100	100	100	100	100	100	100	100	100	100	100	100	100	100	100	100	100	100	100	100	100	100	100	100	100	100	100	100	100	100	100	100	100	100	100	100	100	100	100	100	97.06	100	96.15	100	100	100	100
27860	100	100	100	100	100	100	100	100	100	100	100	100	100	100	100	100	100	100	100	100	100	100	100	100	100	100	100	100	100	100	100	100	100	100	100	100	100	100	100	100	100	100	97.06	100	96.15	100	100	100	100
27880	100	100	100	100	100	100	100	100	100	100	100	100	100	100	100	100	100	100	100	100	100	100	100	100	100	100	100	100	100	100	100	100	100	100	100	100	100	100	100	100	100	100	97.06	100	96.15	100	100	100	100
27900	100	100	100	100	100	100	100	100	100	100	100	100	100	100	100	100	100	100	100	100	100	100	100	100	100	100	100	100	100	100	100	100	100	100	100	100	100	100	100	100	100	100	97.06	100	96.15	100	100	100	100
27920	100	100	100	100	100	100	100	100	100	100	100	100	100	100	100	100	100	100	100	100	100	100	100	100	100	100	100	100	100	100	100	100	100	100	100	100	100	100	100	100	100	100	97.06	100	96.15	100	100	100	100
27940	100	100	100	100	100	100	100	100	100	100	100	100	100	100	100	100	100	100	100	100	100	100	100	100	100	100	100	100	100	100	100	100	100	100	100	100	100	100	100	100	100	100	97.06	100	96.15	100	100	100	100
27960	100	100	100	100	100	100	100	100	100	100	100	100	100	100	100	100	100	100	100	100	100	100	100	100	100	100	100	100	100	100	100	100	100	100	100	100	100	100	100	100	100	100	97.06	100	96.15	100	100	100	100
27980	100	100	100	100	100	100	100	100	100	100	100	100	100	100	100	100	100	100	100	100	100	100	100	100	100	100	100	100	100	100	100	100	100	100	100	100	100	100	100	100	100	100	97.06	100	96.15	100	100	100	100
28000	100	100	100	100	100	100	100	100	100	100	100	100	100	100	100	100	100	100	100	100	100	100	100	100	100	100	100	100	100	100	100	100	100	100	100	100	100	100	100	100	100	100	97.06	100	96.15	100	100	100	100
28020	100	100	100	100	100	100	100	100	100	100	100	100	100	100	100	100	100	100	100	100	100	100	100	100	100	100	100	100	100	100	100	100	100	100	100	100	100	100	100	100	100	100	97.06	100	96.15	100	100	100	100
28040	100	100	100	100	100	100	100	100	100	100	100	100	100	100	100	100	100	100	100	100	100	100	100	100	100	100	100	100	100	100	100	100	100	100	100	100	100	100	100	100	100	100	97.06	100	96.15	100	100	100	100
28060	100	100	100	100	100	100	100	100	100	100	100	100	100	100	100	100	100	100	100	100	100	100	100	100	100	100	100	100	100	100	100	100	100	100	100	100	100	100	100	100	100	100	97.06	100	96.15	100	100	100	100
28080	100	100	100	100	100	100	100	100	100	100	100	100	100	100	100	100	100	100	100	100	100	100	100	100	100	100	100	100	100	100	100	100	100	100	100	100	100	100	100	100	100	100	97.06	100	96.15	100	100	100	100
28100	100	100	100	100	100	100	100	100	100	100	100	100	100	100	100	100	100	100	100	100	100	100	100	100	100	100	100	100	100	100	100	100	100	100	100	100	100	100	100	100	100	100	97.06	100	96.15	100	100	100	100
28120	100	100	100	100	100	100	100	100	100	100	100	100	100	100	100	100	100	100	100	100	100	100	100	100	100	100	100	100	100	100	100	100	100	100	100	100	100	100	100	100	100	100	97.06	100	96.15	100	100	100	100
28140	100	100	100	100	100	100	100	100	100	100	100	100	100	100	100	100	100	100	100	100	100	100	100	100	100	100	100	100	100	100	100	100	100	100	100	100	100	100	100	100	100	100	97.06	100	96.15	100	100	100	100
28160	100	100	100	100	100	100	100	100	100	100	100	100	100	100	100	100	100	100	100	100	100	100	100	100	100	100	100	100	100	100	100	100	100	100	100	100	100	100	100	100	100	100	97.06	100	96.15	100	100	100	100
28180	100	100	100	100	100	100	100	100	100	100	100	100	100	100	100	100	100	100	100	100	100	100	100	100	100	100	100	100	100	100	100	100	100	100	100	100	100	100	100	100	100	100	97.06	100	96.15	100	100	100	100
28200	100	100	100	100	100	100	100	100	100	100	100	100	100	100	100	100	100	100	100	100	100	100	100	100	100	100	100	100	100	100	100	100	100	100	100	100	100	100	100	100	100	100	97.06	100	96.15	100	100	100	100
28220	100	100	100	100	100	100	100	100	100	100	100	100	100	100	100	100	100	100	100	100	100	100	100	100	100	100	100	100	100	100	100	100	100	100	100	100	100	100	100	100	100	100	97.06	100	96.15	100	100	100	100
28240	100	100	100	100	100	100	100	100	100	100	100	100	100	100	100	100	100	100	100	100	100	100	100	100	100	100	100	100	100	100	100	100	100	100	100	100	100	100	100	100	100	100	97.06	100	96.15	100	100	100	100
28260	100	100	100	100	100	100	100	100	100	100	100	100	100	100	100	100	100	100	100	100	100	100	100	100	100	100	100	100	100	100	100	100	100	100	100	100	100	100	100	100	100	100	97.06	100	96.15	100	100	100	100
28280	100	100	100	100	100	100	100	100	100	100	100	100	100	100	100	100	100	100	100	100	100	100	100	100	100	100	100	100	100	100	100	100	100	100	100	100	100	100	100	100	100	100	97.06	100	96.15	100	100	100	100
28300	100	100	100	100	100	100	100	100	100	100	100	100	100	100	100	100	100	100	100	100	100	100	100	100	100	100	100	100	100	100	100	100	100	100	100	100	100	100	100	100	100	100	97.06	100	96.15	100	100	100	100
28320	100	100	100	100	100	100	100	100	100	100	100	100	100	100	100	100	100	100	100	100	100	100	100	100	100	100	100	100	100	100	100	100	100	100	100	100	100	100	100	100	100	100	97.06	100	96.15	100	100	100	100
28340	100	100	100	100	100	100	100	100	100	100	100	100	100	100	100	100	100	100	100	100	100	100	100	100	100	100	100	100	100	100	100	100	100	100	100	100	100	100	100	100	100	100	97.06	100	96.15	100	100	100	100
28360	100	100	100	100	100	100	100	100	100	100	100	100	100	100	100	100	100	100	100	100	100	100	100	100	100	100	100	100	100	100	100	100	100	100	100	100	100	100	100	100	100	100	97.06	100	96.15	100	100	100	100
28380	100	100	100	100	100	100	100	100	100	100	100	100	100	100	100	100	100	100	100	100	100	100	100	100	100	100	100	100	100	100	100	100	100	100	100	100	100	100	100	100	100	100	97.06	100	96.15	100	100	100	100
28400	100	100	100	100	100	100	100	100	100	100	100	100	100	100	100	100	100	100	100	100	100	100	100	100	100	100	100	100	100	100	100	100	100	100	100	100	100	100	100	100	100	100	97.06	100	96.15	100	100	100	100
28420	100	100	100	100	100	100	100	100	100	100	100	100	100	100	100	100	100	100	100	100	100	100	100	100	100	100	100	100	100	100	100	100	100	100	100	100	100	100	100	100	100	100	97.06	100	96.15	100	100	100	100
28440	100	100	100	100	100	100	100	100	100	100	100	100	100	100	100	100	100	100	100	100	100	100	100	100	100	100	100	100	100	100	100	100	100	100	100	100	100	100	100	100	100	100	97.06	100	96.15	100	100	100	100
28460	100	100	100	100	100	100	100	100	100	100	100	100	100	100	100	100	100	100	100	100	100	100	100	100	100	100	100	100	100	100	100	100	100	100	100	100	100	100	100	100	100	100	97.06	100	96.15	100	100	100	100
28480	100	100	100	100	100	100	100	100	100	100	100	100	100	100	100	100	100	100	100	100	100	100	100	100	100	100	100	100	100	100	100	100	100	100	100	100	100	100	100	100	100	100	97.06	100	96.15	100	100	100	100
28500	100	100	100	100	100	100	100	100	100	100	100	100	100	100	100	100	100	100	100	100	100	100	100	100	100	100	100	100	100	100	100	100	100	100	100	100	100	100	100	100	100	100	97.06	100	96.15	100	100	100	100
28520	100	100	100	100	100	100	100	100	100	100	100	100	100	100	100	100	100	100	100	100	100	100	100	100	100	100	100	100	100	100	100	100	100	100	100	100	100	100	100	100	100	100	97.06	100	96.15	100	100	100	100
28540	100	100	100	100	100	100	100	100	100	100	100	100	100	100	100	100	100	100	100	100	100	100	100	100	100	100	100	100	100	100	100	100	100	100	100	100	100	100	100	100	100	100	97.06	100	96.15	100	100	100	100
28560	100	100	100	100	100	100	100	100	100	100	100	100	100	100	100	100	100	100	100	100	100	100	100	100	100	100	100	100	100	100	100	100	100	100	100	100	100	100	100	100	100	100	97.06	100	96.15	100	100	100	100
28580	100	100	100	100	100	100	100	100	100	100	100	100	100	100	100	100	100	100	100	100	100	100	100	100	100	100	100	100	100	100	100	100	100	100	100	100	100	100	100	100	100	100	97.06	100	96.15	100	100	100	100
28600	100	100	100	100	100	100	100	100	100	100	100	100	100	100	100	100	100	100	100	100	100	100	100	100	100	100	100	100	100	100	100	100	100	100	100	100	100	100	100	100	100	100	97.06	100	96.15	100	100	100	100
28620	100	100	100	100	100	100	100	100	100	100	100	100	100	100	100	100	100	100	100	100	100	100	100	100	100	100	100	100	100	100	100	100	100	100	100	100	100	100	100	100	100	100	97.06	100	96.15	100	100	100	100
28640	100	100	100	100	100	100	100	100	100	100	100	100	100	100	100	100	100	100	100	100	100	100	100	100	100	100	100	100	100	100	100	100	100	100	100	100	100	100	100	100	100	100	97.06	100	96.15	100	100	100	100
28660	100	100	100	100	100	100	100	100	100	100	100	100	100	100	100	100	100	100	100	100	100	100	100	100	100	100	100	100	100	100	100	100	100	100	100	100	100	100	100	100	100	100	97.06	100	96.15	100	100	100	100
28680	100	100	100	100	100	100	100	100	100	100	100	100	100	100	100	100	100	100	100	100	100	100	100	100	100	100	100	100	100	100	100	100	100	100	100	100	100	100	100	100	100	100	97.06	100	96.15	100	100	100	100
28700	100	100	100	100	100	100	100	100	100	100	100	100	100	100	100	100	100	100	100	100	100	100	100	100	100	100	100	100	100	100	100	100	100	100	100	100	100	100	100	100	100	100	97.06	100	96.15	100	100	100	100
28720	100	100	100	100	100	100	100	100	100	100	100	100	100	100	100	100	100	100	100	100	100	100	100	100	100	100	100	100	100	100	100	100	100	100	100	100	100	100	100	100	100	100	97.06	100	96.15	100	100	100	100
28740	100	100	100	100	100	100	100	100	100	100	100	100	100	100	100	100	100	100	100	100	100	100	100	100	100	100	100	100	100	100	100	100	100	100	100	100	100	100	100	100	100	100	97.06	100	96.15	100	100	100	100
28760	100	100	100	100	100	100	100	100	100	100	100	100	100	100	100	100	100	100	100	100	100	100	100	100	100	100	100	100	100	100	100	100	100	100	100	100	100	100	100	100	100	100	97.06	100	96.15	100	100	100	100
28780	100	100	100	100	100	100	100	100	100	100	100	100	100	100	100	100	100	100	100	100	100	100	100	100	100	100	100	100	100	100	100	100	100	100	100	100	100	100	100	100	100	100	97.06	100	96.15	100	100	100	100
28800	100	100	100	100	100	100	100	100	100	100	100	100	100	100	100	100	100	100	100	100	100	100	100	100	100	100	100	100	100	100	100	100	100	100	100	100	100	100	100	100	100	100	97.06	100	96.15	100	100	100	100
28820	100	100	100	100	100	100	100	100	100	100	100	100	100	100	100	100	100	100	100	100	100	100	100	100	100	100	100	100	100	100	100	100	100	100	100	100	100	100	100	100	100	100	97.06	100	96.15	100	100	100	100
28840	100	100	100	100	100	100	100	100	100	100	100	100	100	100	100	100	100	100	100	100	100	100	100	100	100	100	100	100	100	100	100	100	100	100	100	100	100	100	100	100	100	100	97.06	100	96.15	100	100	100	100
28860	100	100	100	100	100	100	100	100	100	100	100	100	100	100	100	100	100	100	100	100	100	100	100	100	100	100	100	100	100	100	100	100	100	100	100	100	100	100	100	100	100	100	97.06	100	96.15	100	100	100	100
28880	100	100	100	100	100	100	100	100	100	100	100	100	100	100	100	100	100	100	100	100	100	100	100	100	100	100	100	100	100	100	100	100	100	100	100	100	100	100	100	100	100	100	97.06	100	96.15	100	100	100	100
28900	100	100	100	100	100	100	100	100	100	100	100	100	100	100	100	100	100	100	100	100	100	100	100	100	100	100	100	100	100	100	100	100	100	100	100	100	100	100	100	100	100	100	97.06	100	96.15	100	100	100	100
28920	100	100	100	100	100	100	100	100	100	100	100	100	100	100	100	100	100	100	100	100	100	100	100	100	100	100	100	100	100	100	100	100	100	100	100	100	100	100	100	100	100	100	97.06	100	96.15	100	100	100	100
28940	100	100	100	100	100	100	100	100	100	100	100	100	100	100	100	100	100	100	100	100	100	100	100	100	100	100	100	100	100	100	100	100	100	100	100	100	100	100	100	100	100	100	97.06	100	96.15	100	100	100	100
28960	100	100	100	100	100	100	100	100	100	100	100	100	100	100	100	100	100	100	100	100	100	100	100	100	100	100	100	100	100	100	100	100	100	100	100	100	100	100	100	100	100	100	97.06	100	96.15	100	100	100	100
28980	100	100	100	100	100	100	100	100	100	100	100	100	100	100	100	100	100	100	100	100	100	100	100	100	100	100	100	100	100	100	100	100	100	100	100	100	100	100	100	100	100	100	97.06	100	96.15	100	100	100	100
29000	100	100	100	100	100	100	100	100	100	100	100	100	100	100	100	100	100	100	100	100	100	100	100	100	100	100	100	100	100	100	100	100	100	100	100	100	100	100	100	100	100	100	97.06	100	96.15	100	100	100	100
29020	100	100	100	100	100	100	100	100	100	100	100	100	100	100	100	100	100	100	100	100	100	100	100	100	100	100	100	100	100	100	100	100	100	100	100	100	100	100	100	100	100	100	97.06	100	96.15	100	100	100	100
29040	100	100	100	100	100	100	100	100	100	100	100	100	100	100	100	100	100	100	100	100	100	100	100	100	100	100	100	100	100	100	100	100	100	100	100	100	100	100	100	100	100	100	97.06	100	96.15	100	100	100	100
29060	100	100	100	100	100	100	100	100	100	100	100	100	100	100	100	100	100	100	100	100	100	100	100	100	100	100	100	100	100	100	100	100	100	100	100	100	100	100	100	100	100	100	97.06	100	96.15	100	100	100	100
29080	100	100	100	100	100	100	100	100	100	100	100	100	100	100	100	100	100	100	100	100	100	100	100	100	100	100	100	100	100	100	100	100	100	100	100	100	100	100	100	100	100	100	97.06	100	96.15	100	100	100	100
29100	100	100	100	100	100	100	100	100	100	100	100	100	100	100	100	100	100	100	100	100	100	100	100	100	100	100	100	100	100	100	100	100	100	100	100	100	100	100	100	100	100	100	97.06	100	96.15	100	100	100	100
29120	100	100	100	100	100	100	100	100	100	100	100	100	100	100	100	100	100	100	100	100	100	100	100	100	100	100	100	100	100	100	100	100	100	100	100	100	100	100	100	100	100	100	97.06	100	96.15	100	100	100	100
29140	100	100	100	100	100	100	100	100	100	100	100	100	100	100	100	100	100	100	100	100	100	100	100	100	100	100	100	100	100	100	100	100	100	100	100	100	100	100	100	100	100	100	97.06	100	96.15	100	100	100	100
29160	100	100	100	100	100	100	100	100	100	100	100	100	100	100	100	100	100	100	100	100	100	100	100	100	100	100	100	100	100	100	100	100	100	100	100	100	100	100	100	100	100	100	97.06	100	96.15	100	100	100	100
29180	100	100	100	100	100	100	100	100	100	100	100	100	100	100	100	100	100	100	100	100	100	100	100	100	100	100	100	100	100	100	100	100	100	100	100	100	100	100	100	100	100	100	97.06	100	96.15	100	100	100	100
29200	100	100	100	100	100	100	100	100	100	100	100	100	100	100	100	100	100	100	100	100	100	100	100	100	100	100	100	100	100	100	100	100	100	100	100	100	100	100	100	100	100	100	97.06	100	96.15	100	100	100	100
29220	100	100	100	100	100	100	100	100	100	100	100	100	100	100	100	100	100	100	100	100	100	100	100	100	100	100	100	100	100	100	100	100	100	100	100	100	100	100	100	100	100	100	97.06	100	96.15	100	100	100	100
29240	100	100	100	100	100	100	100	100	100	100	100	100	100	100	100	100	100	100	100	100	100	100	100	100	100	100	100	100	100	100	100	100	100	100	100	100	100	100	100	100	100	100	97.06	100	96.15	100	100	100	100
29260	100	100	100	100	100	100	100	100	100	100	100	100	100	100	100	100	100	100	100	100	100	100	100	100	100	100	100	100	100	100	100	100	100	100	100	100	100	100	100	100	100	100	97.06	100	96.15	100	100	100	100
29280	100	100	100	100	100	100	100	100	100	100	100	100	100	100	100	100	100	100	100	100	100	100	100	100	100	100	100	100	100	100	100	100	100	100	100	100	100	100	100	100	100	100	97.06	100	96.15	100	100	100	100
29300	100	100	100	100	100	100	100	100	100	100	100	100	100	100	100	100	100	100	100	100	100	100	100	100	100	100	100	100	100	100	100	100	100	100	100	100	100	100	100	100	100	100	97.06	100	96.15	100	100	100	100
29320	100	100	100	100	100	100	100	100	100	100	100	100	100	100	100	100	100	100	100	100	100	100	100	100	100	100	100	100	100	100	100	100	100	100	100	100	100	100	100	100	100	100	97.06	100	96.15	100	100	100	100
29340	100	100	100	100	100	100	100	100	100	100	100	100	100	100	100	100	100	100	100	100	100	100	100	100	100	100	100	100	100	100	100	100	100	100	100	100	100	100	100	100	100	100	97.06	100	96.15	100	100	100	100
29360	100	100	100	100	100	100	100	100	100	100	100	100	100	100	100	100	100	100	100	100	100	100	100	100	100	100	100	100	100	100	100	100	100	100	100	100	100	100	100	100	100	100	97.06	100	96.15	100	100	100	100
29380	100	100	100	100	100	100	100	100	100	100	100	100	100	100	100	100	100	100	100	100	100	100	100	100	100	100	100	100	100	100	100	100	100	100	100	100	100	100	100	100	100	100	97.06	100	96.15	100	100	100	100
29400	100	100	100	100	100	100	100	100	100	100	100	100	100	100	100	100	100	100	100	100	100	100	100	100	100	100	100	100	100	100	100	100	100	100	100	100	100	100	100	100	100	100	97.06	100	100	100	100	100	100
29420	100	100	100	100	100	100	100	100	100	100	100	100	100	100	100	100	100	100	100	100	100	100	100	100	100	100	100	100	100	100	100	100	100	100	100	100	100	100	100	100	100	100	97.06	100	100	100	100	100	100
29440	100	100	100	100	100	100	100	100	100	100	100	100	100	100	100	100	100	100	100	100	100	100	100	100	100	100	100	100	100	100	100	100	100	100	100	100	100	100	100	100	100	100	97.06	100	100	100	100	100	100
29460	100	100	100	100	100	100	100	100	100	100	100	100	100	100	100	100	100	100	100	100	100	100	100	100	100	100	100	100	100	100	100	100	100	100	100	100	100	100	100	100	100	100	97.06	100	100	100	100	100	100
29480	100	100	100	100	100	100	100	100	100	100	100	100	100	100	100	100	100	100	100	100	100	100	100	100	100	100	100	100	100	100	100	100	100	100	100	100	100	100	100	100	100	100	97.06	100	100	100	100	100	100
29500	100	100	100	100	100	100	100	100	100	100	100	100	100	100	100	100	100	100	100	100	100	100	100	100	100	100	100	100	100	100	100	100	100	100	100	100	100	100	100	100	100	100	97.06	100	100	100	100	100	100
29520	100	100	100	100	100	100	100	100	100	100	100	100	100	100	100	100	100	100	100	100	100	100	100	100	100	100	100	100	100	100	100	100	100	100	100	100	100	100	100	100	100	100	97.06	100	100	100	100	100	100
29540	100	100	100	100	100	100	100	100	100	100	100	100	100	100	100	100	100	100	100	100	100	100	100	100	100	100	100	100	100	100	100	100	100	100	100	100	100	100	100	100	100	100	97.06	100	100	100	100	100	100
29560	100	100	100	100	100	100	100	100	100	100	100	100	100	100	100	100	100	100	100	100	100	100	100	100	100	100	100	100	100	100	100	100	100	100	100	100	100	100	100	100	100	100	97.06	100	100	100	100	100	100
29580	100	100	100	100	100	100	100	100	100	100	100	100	100	100	100	100	100	100	100	100	100	100	100	100	100	100	100	100	100	100	100	100	100	100	100	100	100	100	100	100	100	100	97.06	100	100	100	100	100	100
29600	100	100	100	100	100	100	100	100	100	100	100	100	100	100	100	100	100	100	100	100	100	100	100	100	100	100	100	100	100	100	100	100	100	100	100	100	100	100	100	100	100	100	97.06	100	100	100	100	100	100
29620	100	100	100	100	100	100	100	100	100	100	100	100	100	100	100	100	100	100	100	100	100	100	100	100	100	100	100	100	100	100	100	100	100	100	100	100	100	100	100	100	100	100	97.06	100	100	100	100	100	100
29640	100	100	100	100	100	100	100	100	100	100	100	100	100	100	100	100	100	100	100	100	100	100	100	100	100	100	100	100	100	100	100	100	100	100	100	100	100	100	100	100	100	100	97.06	100	100	100	100	100	100
29660	100	100	100	100	100	100	100	100	100	100	100	100	100	100	100	100	100	100	100	100	100	100	100	100	100	100	100	100	100	100	100	100	100	100	100	100	100	100	100	100	100	100	97.06	100	100	100	100	100	100
29680	100	100	100	100	100	100	100	100	100	100	100	100	100	100	100	100	100	100	100	100	100	100	100	100	100	100	100	100	100	100	100	100	100	100	100	100	100	100	100	100	100	100	97.06	100	100	100	100	100	100
29700	100	100	100	100	100	100	100	100	100	100	100	100	100	100	100	100	100	100	100	100	100	100	100	100	100	100	100	100	100	100	100	100	100	100	100	100	100	100	100	100	100	100	97.06	100	100	100	100	100	100
29720	100	100	100	100	100	100	100	100	100	100	100	100	100	100	100	100	100	100	100	100	100	100	100	100	100	100	100	100	100	100	100	100	100	100	100	100	100	100	100	100	100	100	97.06	100	100	100	100	100	100
29740	100	100	100	100	100	100	100	100	100	100	100	100	100	100	100	100	100	100	100	100	100	100	100	100	100	100	100	100	100	100	100	100	100	100	100	100	100	100	100	100	100	100	97.06	100	100	100	100	100	100
29760	100	100	100	100	100	100	100	100	100	100	100	100	100	100	100	100	100	100	100	100	100	100	100	100	100	100	100	100	100	100	100	100	100	100	100	100	100	100	100	100	100	100	97.06	100	100	100	100	100	100
29780	100	100	100	100	100	100	100	100	100	100	100	100	100	100	100	100	100	100	100	100	100	100	100	100	100	100	100	100	100	100	100	100	100	100	100	100	100	100	100	100	100	100	97.06	100	100	100	100	100	100
29800	100	100	100	100	100	100	100	100	100	100	100	100	100	100	100	100	100	100	100	100	100	100	100	100	100	100	100	100	100	100	100	100	100	100	100	100	100	100	100	100	100	100	97.06	100	100	100	100	100	100
29820	100	100	100	100	100	100	100	100	100	100	100	100	100	100	100	100	100	100	100	100	100	100	100	100	100	100	100	100	100	100	100	100	100	100	100	100	100	100	100	100	100	100	97.06	100	100	100	100	100	100
29840	100	100	100	100	100	100	100	100	100	100	100	100	100	100	100	100	100	100	100	100	100	100	100	100	100	100	100	100	100	100	100	100	100	100	100	100	100	100	100	100	100	100	97.06	100	100	100	100	100	100
29860	100	100	100	100	100	100	100	100	100	100	100	100	100	100	100	100	100	100	100	100	100	100	100	100	100	100	100	100	100	100	100	100	100	100	100	100	100	100	100	100	100	100	97.06	100	100	100	100	100	100
29880	100	100	100	100	100	100	100	100	100	100	100	100	100	100	100	100	100	100	100	100	100	100	100	100	100	100	100	100	100	100	100	100	100	100	100	100	100	100	100	100	100	100	97.06	100	100	100	100	100	100
29900	100	100	100	100	100	100	100	100	100	100	100	100	100	100	100	100	100	100	100	100	100	100	100	100	100	100	100	100	100	100	100	100	100	100	100	100	100	100	100	100	100	100	97.06	100	100	100	100	100	100
29920	100	100	100	100	100	100	100	100	100	100	100	100	100	100	100	100	100	100	100	100	100	100	100	100	100	100	100	100	100	100	100	100	100	100	100	100	100	100	100	100	100	100	97.06	100	100	100	100	100	100
29940	100	100	100	100	100	100	100	100	100	100	100	100	100	100	100	100	100	100	100	100	100	100	100	100	100	100	100	100	100	100	100	100	100	100	100	100	100	100	100	100	100	100	97.06	100	100	100	100	100	100
29960	100	100	100	100	100	100	100	100	100	100	100	100	100	100	100	100	100	100	100	100	100	100	100	100	100	100	100	100	100	100	100	100	100	100	100	100	100	100	100	100	100	100	97.06	100	100	100	100	100	100
29980	100	100	100	100	100	100	100	100	100	100	100	100	100	100	100	100	100	100	100	100	100	100	100	100	100	100	100	100	100	100	100	100	100	100	100	100	100	100	100	100	100	100	97.06	100	100	100	100	100	100
30000	100	100	100	100	100	100	100	100	100	100	100	100	100	100	100	100	100	100	100	100	100	100	100	100	100	100	100	100	100	100	100	100	100	100	100	100	100	100	100	100	100	100	97.06	100	100	100	100	100	100
30020	100	100	100	100	100	100	100	100	100	100	100	100	100	100	100	100	100	100	100	100	100	100	100	100	100	100	100	100	100	100	100	100	100	100	100	100	100	100	100	100	100	100	97.06	100	100	100	100	100	100
30040	100	100	100	100	100	100	100	100	100	100	100	100	100	100	100	100	100	100	100	100	100	100	100	100	100	100	100	100	100	100	100	100	100	100	100	100	100	100	100	100	100	100	97.06	100	100	100	100	100	100
30060	100	100	100	100	100	100	100	100	100	100	100	100	100	100	100	100	100	100	100	100	100	100	100	100	100	100	100	100	100	100	100	100	100	100	100	100	100	100	100	100	100	100	97.06	100	100	100	100	100	100
30080	100	100	100	100	100	100	100	100	100	100	100	100	100	100	100	100	100	100	100	100	100	100	100	100	100	100	100	100	100	100	100	100	100	100	100	100	100	100	100	100	100	100	97.06	100	100	100	100	100	100
30100	100	100	100	100	100	100	100	100	100	100	100	100	100	100	100	100	100	100	100	100	100	100	100	100	100	100	100	100	100	100	100	100	100	100	100	100	100	100	100	100	100	100	97.06	100	100	100	100	100	100
30120	100	100	100	100	100	100	100	100	100	100	100	100	100	100	100	100	100	100	100	100	100	100	100	100	100	100	100	100	100	100	100	100	100	100	100	100	100	100	100	100	100	100	97.06	100	100	100	100	100	100
30140	100	100	100	100	100	100	100	100	100	100	100	100	100	100	100	100	100	100	100	100	100	100	100	100	100	100	100	100	100	100	100	100	100	100	100	100	100	100	100	100	100	100	97.06	100	100	100	100	100	100
30160	100	100	100	100	100	100	100	100	100	100	100	100	100	100	100	100	100	100	100	100	100	100	100	100	100	100	100	100	100	100	100	100	100	100	100	100	100	100	100	100	100	100	97.06	100	100	100	100	100	100
30180	100	100	100	100	100	100	100	100	100	100	100	100	100	100	100	100	100	100	100	100	100	100	100	100	100	100	100	100	100	100	100	100	100	100	100	100	100	100	100	100	100	100	97.06	100	100	100	100	100	100
30200	100	100	100	100	100	100	100	100	100	100	100	100	100	100	100	100	100	100	100	100	100	100	100	100	100	100	100	100	100	100	100	100	100	100	100	100	100	100	100	100	100	100	97.06	100	100	100	100	100	100
30220	100	100	100	100	100	100	100	100	100	100	100	100	100	100	100	100	100	100	100	100	100	100	100	100	100	100	100	100	100	100	100	100	100	100	100	100	100	100	100	100	100	100	97.06	100	100	100	100	100	100
30240	100	100	100	100	100	100	100	100	100	100	100	100	100	100	100	100	100	100	100	100	100	100	100	100	100	100	100	100	100	100	100	100	100	100	100	100	100	100	100	100	100	100	97.06	100	100	100	100	100	100
30260	100	100	100	100	100	100	100	100	100	100	100	100	100	100	100	100	100	100	100	100	100	100	100	100	100	100	100	100	100	100	100	100	100	100	100	100	100	100	100	100	100	100	97.06	100	100	100	100	100	100
30280	100	100	100	100	100	100	100	100	100	100	100	100	100	100	100	100	100	100	100	100	100	100	100	100	100	100	100	100	100	100	100	100	100	100	100	100	100	100	100	100	100	100	97.06	100	100	100	100	100	100
30300	100	100	100	100	100	100	100	100	100	100	100	100	100	100	100	100	100	100	100	100	100	100	100	100	100	100	100	100	100	100	100	100	100	100	100	100	100	100	100	100	100	100	97.06	100	100	100	100	100	100
30320	100	100	100	100	100	100	100	100	100	100	100	100	100	100	100	100	100	100	100	100	100	100	100	100	100	100	100	100	100	100	100	100	100	100	100	100	100	100	100	100	100	100	97.06	100	100	100	100	100	100
30340	100	100	100	100	100	100	100	100	100	100	100	100	100	100	100	100	100	100	100	100	100	100	100	100	100	100	100	100	100	100	100	100	100	100	100	100	100	100	100	100	100	100	97.06	100	100	100	100	100	100
30360	100	100	100	100	100	100	100	100	100	100	100	100	100	100	100	100	100	100	100	100	100	100	100	100	100	100	100	100	100	100	100	100	100	100	100	100	100	100	100	100	100	100	97.06	100	100	100	100	100	100
30380	100	100	100	100	100	100	100	100	100	100	100	100	100	100	100	100	100	100	100	100	100	100	100	100	100	100	100	100	100	100	100	100	100	100	100	100	100	100	100	100	100	100	97.06	100	100	100	100	100	100
30400	100	100	100	100	100	100	100	100	100	100	100	100	100	100	100	100	100	100	100	100	100	100	100	100	100	100	100	100	100	100	100	100	100	100	100	100	100	100	100	100	100	100	97.06	100	100	100	100	100	100
30420	100	100	100	100	100	100	100	100	100	100	100	100	100	100	100	100	100	100	100	100	100	100	100	100	100	100	100	100	100	100	100	100	100	100	100	100	100	100	100	100	100	100	97.06	100	100	100	100	100	100
30440	100	100	100	100	100	100	100	100	100	100	100	100	100	100	100	100	100	100	100	100	100	100	100	100	100	100	100	100	100	100	100	100	100	100	100	100	100	100	100	100	100	100	97.06	100	100	100	100	100	100
30460	100	100	100	100	100	100	100	100	100	100	100	100	100	100	100	100	100	100	100	100	100	100	100	100	100	100	100	100	100	100	100	100	100	100	100	100	100	100	100	100	100	100	97.06	100	100	100	100	100	100
30480	100	100	100	100	100	100	100	100	100	100	100	100	100	100	100	100	100	100	100	100	100	100	100	100	100	100	100	100	100	100	100	100	100	100	100	100	100	100	100	100	100	100	97.06	100	100	100	100	100	100
30500	100	100	100	100	100	100	100	100	100	100	100	100	100	100	100	100	100	100	100	100	100	100	100	100	100	100	100	100	100	100	100	100	100	100	100	100	100	100	100	100	100	100	97.06	100	100	100	100	100	100
30520	100	100	100	100	100	100	100	100	100	100	100	100	100	100	100	100	100	100	100	100	100	100	100	100	100	100	100	100	100	100	100	100	100	100	100	100	100	100	100	100	100	100	97.06	100	100	100	100	100	100
30540	100	100	100	100	100	100	100	100	100	100	100	100	100	100	100	100	100	100	100	100	100	100	100	100	100	100	100	100	100	100	100	100	100	100	100	100	100	100	100	100	100	100	97.06	100	100	100	100	100	100
30560	100	100	100	100	100	100	100	100	100	100	100	100	100	100	100	100	100	100	100	100	100	100	100	100	100	100	100	100	100	100	100	100	100	100	100	100	100	100	100	100	100	100	97.06	100	100	100	100	100	100
30580	100	100	100	100	100	100	100	100	100	100	100	100	100	100	100	100	100	100	100	100	100	100	100	100	100	100	100	100	100	100	100	100	100	100	100	100	100	100	100	100	100	100	97.06	100	100	100	100	100	100
30600	100	100	100	100	100	100	100	100	100	100	100	100	100	100	100	100	100	100	100	100	100	100	100	100	100	100	100	100	100	100	100	100	100	100	100	100	100	100	100	100	100	100	97.06	100	100	100	100	100	100
30620	100	100	100	100	100	100	100	100	100	100	100	100	100	100	100	100	100	100	100	100	100	100	100	100	100	100	100	100	100	100	100	100	100	100	100	100	100	100	100	100	100	100	97.06	100	100	100	100	100	100
30640	100	100	100	100	100	100	100	100	100	100	100	100	100	100	100	100	100	100	100	100	100	100	100	100	100	100	100	100	100	100	100	100	100	100	100	100	100	100	100	100	100	100	97.06	100	100	100	100	100	100
30660	100	100	100	100	100	100	100	100	100	100	100	100	100	100	100	100	100	100	100	100	100	100	100	100	100	100	100	100	100	100	100	100	100	100	100	100	100	100	100	100	100	100	97.06	100	100	100	100	100	100
30680	100	100	100	100	100	100	100	100	100	100	100	100	100	100	100	100	100	100	100	100	100	100	100	100	100	100	100	100	100	100	100	100	100	100	100	100	100	100	100	100	100	100	97.06	100	100	100	100	100	100
30700	100	100	100	100	100	100	100	100	100	100	100	100	100	100	100	100	100	100	100	100	100	100	100	100	100	100	100	100	100	100	100	100	100	100	100	100	100	100	100	100	100	100	97.06	100	100	100	100	100	100
30720	100	100	100	100	100	100	100	100	100	100	100	100	100	100	100	100	100	100	100	100	100	100	100	100	100	100	100	100	100	100	100	100	100	100	100	100	100	100	100	100	100	100	97.06	100	100	100	100	100	100
30740	100	100	100	100	100	100	100	100	100	100	100	100	100	100	100	100	100	100	100	100	100	100	100	100	100	100	100	100	100	100	100	100	100	100	100	100	100	100	100	100	100	100	97.06	100	100	100	100	100	100
30760	100	100	100	100	100	100	100	100	100	100	100	100	100	100	100	100	100	100	100	100	100	100	100	100	100	100	100	100	100	100	100	100	100	100	100	100	100	100	100	100	100	100	97.06	100	100	100	100	100	100
30780	100	100	100	100	100	100	100	100	100	100	100	100	100	100	100	100	100	100	100	100	100	100	100	100	100	100	100	100	100	100	100	100	100	100	100	100	100	100	100	100	100	100	97.06	100	100	100	100	100	100
30800	100	100	100	100	100	100	100	100	100	100	100	100	100	100	100	100	100	100	100	100	100	100	100	100	100	100	100	100	100	100	100	100	100	100	100	100	100	100	100	100	100	100	97.06	100	100	100	100	100	100
30820	100	100	100	100	100	100	100	100	100	100	100	100	100	100	100	100	100	100	100	100	100	100	100	100	100	100	100	100	100	100	100	100	100	100	100	100	100	100	100	100	100	100	97.06	100	100	100	100	100	100
30840	100	100	100	100	100	100	100	100	100	100	100	100	100	100	100	100	100	100	100	100	100	100	100	100	100	100	100	100	100	100	100	100	100	100	100	100	100	100	100	100	100	100	97.06	100	100	100	100	100	100
30860	100	100	100	100	100	100	100	100	100	100	100	100	100	100	100	100	100	100	100	100	100	100	100	100	100	100	100	100	100	100	100	100	100	100	100	100	100	100	100	100	100	100	97.06	100	100	100	100	100	100
30880	100	100	100	100	100	100	100	100	100	100	100	100	100	100	100	100	100	100	100	100	100	100	100	100	100	100	100	100	100	100	100	100	100	100	100	100	100	100	100	100	100	100	97.06	100	100	100	100	100	100
30900	100	100	100	100	100	100	100	100	100	100	100	100	100	100	100	100	100	100	100	100	100	100	100	100	100	100	100	100	100	100	100	100	100	100	100	100	100	100	100	100	100	100	97.06	100	100	100	100	100	100
30920	100	100	100	100	100	100	100	100	100	100	100	100	100	100	100	100	100	100	100	100	100	100	100	100	100	100	100	100	100	100	100	100	100	100	100	100	100	100	100	100	100	100	97.06	100	100	100	100	100	100
30940	100	100	100	100	100	100	100	100	100	100	100	100	100	100	100	100	100	100	100	100	100	100	100	100	100	100	100	100	100	100	100	100	100	100	100	100	100	100	100	100	100	100	97.06	100	100	100	100	100	100
30960	100	100	100	100	100	100	100	100	100	100	100	100	100	100	100	100	100	100	100	100	100	100	100	100	100	100	100	100	100	100	100	100	100	100	100	100	100	100	100	100	100	100	97.06	100	100	100	100	100	100
30980	100	100	100	100	100	100	100	100	100	100	100	100	100	100	100	100	100	100	100	100	100	100	100	100	100	100	100	100	100	100	100	100	100	100	100	100	100	100	100	100	100	100	97.06	100	100	100	100	100	100
31000	100	100	100	100	100	100	100	100	100	100	100	100	100	100	100	100	100	100	100	100	100	100	100	100	100	100	100	100	100	100	100	100	100	100	100	100	100	100	100	100	100	100	97.06	100	100	100	100	100	100
31020	100	100	100	100	100	100	100	100	100	100	100	100	100	100	100	100	100	100	100	100	100	100	100	100	100	100	100	100	100	100	100	100	100	100	100	100	100	100	100	100	100	100	97.06	100	100	100	100	100	100
31040	100	100	100	100	100	100	100	100	100	100	100	100	100	100	100	100	100	100	100	100	100	100	100	100	100	100	100	100	100	100	100	100	100	100	100	100	100	100	100	100	100	100	97.06	100	100	100	100	100	100
31060	100	100	100	100	100	100	100	100	100	100	100	100	100	100	100	100	100	100	100	100	100	100	100	100	100	100	100	100	100	100	100	100	100	100	100	100	100	100	100	100	100	100	97.06	100	100	100	100	100	100
31080	100	100	100	100	100	100	100	100	100	100	100	100	100	100	100	100	100	100	100	100	100	100	100	100	100	100	100	100	100	100	100	100	100	100	100	100	100	100	100	100	100	100	97.06	100	100	100	100	100	100
31100	100	100	100	100	100	100	100	100	100	100	100	100	100	100	100	100	100	100	100	100	100	100	100	100	100	100	100	100	100	100	100	100	100	100	100	100	100	100	100	100	100	100	97.06	100	100	100	100	100	100
31120	100	100	100	100	100	100	100	100	100	100	100	100	100	100	100	100	100	100	100	100	100	100	100	100	100	100	100	100	100	100	100	100	100	100	100	100	100	100	100	100	100	100	97.06	100	100	100	100	100	100
31140	100	100	100	100	100	100	100	100	100	100	100	100	100	100	100	100	100	100	100	100	100	100	100	100	100	100	100	100	100	100	100	100	100	100	100	100	100	100	100	100	100	100	97.06	100	100	100	100	100	100
31160	100	100	100	100	100	100	100	100	100	100	100	100	100	100	100	100	100	100	100	100	100	100	100	100	100	100	100	100	100	100	100	100	100	100	100	100	100	100	100	100	100	100	97.06	100	100	100	100	100	100
31180	100	100	100	100	100	100	100	100	100	100	100	100	100	100	100	100	100	100	100	100	100	100	100	100	100	100	100	100	100	100	100	100	100	100	100	100	100	100	100	100	100	100	97.06	100	100	100	100	100	100
31200	100	100	100	100	100	100	100	100	100	100	100	100	100	100	100	100	100	100	100	100	100	100	100	100	100	100	100	100	100	100	100	100	100	100	100	100	100	100	100	100	100	100	97.06	100	100	100	100	100	100
31220	100	100	100	100	100	100	100	100	100	100	100	100	100	100	100	100	100	100	100	100	100	100	100	100	100	100	100	100	100	100	100	100	100	100	100	100	100	100	100	100	100	100	97.06	100	100	100	100	100	100
31240	100	100	100	100	100	100	100	100	100	100	100	100	100	100	100	100	100	100	100	100	100	100	100	100	100	100	100	100	100	100	100	100	100	100	100	100	100	100	100	100	100	100	97.06	100	100	100	100	100	100
31260	100	100	100	100	100	100	100	100	100	100	100	100	100	100	100	100	100	100	100	100	100	100	100	100	100	100	100	100	100	100	100	100	100	100	100	100	100	100	100	100	100	100	97.06	100	100	100	100	100	100
31280	100	100	100	100	100	100	100	100	100	100	100	100	100	100	100	100	100	100	100	100	100	100	100	100	100	100	100	100	100	100	100	100	100	100	100	100	100	100	100	100	100	100	97.06	100	100	100	100	100	100
31300	100	100	100	100	100	100	100	100	100	100	100	100	100	100	100	100	100	100	100	100	100	100	100	100	100	100	100	100	100	100	100	100	100	100	100	100	100	100	100	100	100	100	97.06	100	100	100	100	100	100
31320	100	100	100	100	100	100	100	100	100	100	100	100	100	100	100	100	100	100	100	100	100	100	100	100	100	100	100	100	100	100	100	100	100	100	100	100	100	100	100	100	100	100	97.06	100	100	100	100	100	100
31340	100	100	100	100	100	100	100	100	100	100	100	100	100	100	100	100	100	100	100	100	100	100	100	100	100	100	100	100	100	100	100	100	100	100	100	100	100	100	100	100	100	100	97.06	100	100	100	100	100	100
31360	100	100	100	100	100	100	100	100	100	100	100	100	100	100	100	100	100	100	100	100	100	100	100	100	100	100	100	100	100	100	100	100	100	100	100	100	100	100	100	100	100	100	97.06	100	100	100	100	100	100
31380	100	100	100	100	100	100	100	100	100	100	100	100	100	100	100	100	100	100	100	100	100	100	100	100	100	100	100	100	100	100	100	100	100	100	100	100	100	100	100	100	100	100	97.06	100	100	100	100	100	100
31400	100	100	100	100	100	100	100	100	100	100	100	100	100	100	100	100	100	100	100	100	100	100	100	100	100	100	100	100	100	100	100	100	100	100	100	100	100	100	100	100	100	100	97.06	100	100	100	100	100	100
31420	100	100	100	100	100	100	100	100	100	100	100	100	100	100	100	100	100	100	100	100	100	100	100	100	100	100	100	100	100	100	100	100	100	100	100	100	100	100	100	100	100	100	97.06	100	100	100	100	100	100
31440	100	100	100	100	100	100	100	100	100	100	100	100	100	100	100	100	100	100	100	100	100	100	100	100	100	100	100	100	100	100	100	100	100	100	100	100	100	100	100	100	100	100	100	100	100	100	100	100	100
31460	100	100	100	100	100	100	100	100	100	100	100	100	100	100	100	100	100	100	100	100	100	100	100	100	100	100	100	100	100	100	100	100	100	100	100	100	100	100	100	100	100	100	100	100	100	100	100	100	100
31480	100	100	100	100	100	100	100	100	100	100	100	100	100	100	100	100	100	100	100	100	100	100	100	100	100	100	100	100	100	100	100	100	100	100	100	100	100	100	100	100	100	100	100	100	100	100	100	100	100
31500	100	100	100	100	100	100	100	100	100	100	100	100	100	100	100	100	100	100	100	100	100	100	100	100	100	100	100	100	100	100	100	100	100	100	100	100	100	100	100	100	100	100	100	100	100	100	100	100	100
31520	100	100	100	100	100	100	100	100	100	100	100	100	100	100	100	100	100	100	100	100	100	100	100	100	100	100	100	100	100	100	100	100	100	100	100	100	100	100	100	100	100	100	100	100	100	100	100	100	100
31540	100	100	100	100	100	100	100	100	100	100	100	100	100	100	100	100	100	100	100	100	100	100	100	100	100	100	100	100	100	100	100	100	100	100	100	100	100	100	100	100	100	100	100	100	100	100	100	100	100
31560	100	100	100	100	100	100	100	100	100	100	100	100	100	100	100	100	100	100	100	100	100	100	100	100	100	100	100	100	100	100	100	100	100	100	100	100	100	100	100	100	100	100	100	100	100	100	100	100	100
31580	100	100	100	100	100	100	100	100	100	100	100	100	100	100	100	100	100	100	100	100	100	100	100	100	100	100	100	100	100	100	100	100	100	100	100	100	100	100	100	100	100	100	100	100	100	100	100	100	100
31600	100	100	100	100	100	100	100	100	100	100	100	100	100	100	100	100	100	100	100	100	100	100	100	100	100	100	100	100	100	100	100	100	100	100	100	100	100	100	100	100	100	100	100	100	100	100	100	100	100
31620	100	100	100	100	100	100	100	100	100	100	100	100	100	100	100	100	100	100	100	100	100	100	100	100	100	100	100	100	100	100	100	100	100	100	100	100	100	100	100	100	100	100	100	100	100	100	100	100	100
31640	100	100	100	100	100	100	100	100	100	100	100	100	100	100	100	100	100	100	100	100	100	100	100	100	100	100	100	100	100	100	100	100	100	100	100	100	100	100	100	100	100	100	100	100	100	100	100	100	100
31660	100	100	100	100	100	100	100	100	100	100	100	100	100	100	100	100	100	100	100	100	100	100	100	100	100	100	100	100	100	100	100	100	100	100	100	100	100	100	100	100	100	100	100	100	100	100	100	100	100
31680	100	100	100	100	100	100	100	100	100	100	100	100	100	100	100	100	100	100	100	100	100	100	100	100	100	100	100	100	100	100	100	100	100	100	100	100	100	100	100	100	100	100	100	100	100	100	100	100	100
31700	100	100	100	100	100	100	100	100	100	100	100	100	100	100	100	100	100	100	100	100	100	100	100	100	100	100	100	100	100	100	100	100	100	100	100	100	100	100	100	100	100	100	100	100	100	100	100	100	100
31720	100	100	100	100	100	100	100	100	100	100	100	100	100	100	100	100	100	100	100	100	100	100	100	100	100	100	100	100	100	100	100	100	100	100	100	100	100	100	100	100	100	100	100	100	100	100	100	100	100
31740	100	100	100	100	100	100	100	100	100	100	100	100	100	100	100	100	100	100	100	100	100	100	100	100	100	100	100	100	100	100	100	100	100	100	100	100	100	100	100	100	100	100	100	100	100	100	100	100	100
31760	100	100	100	100	100	100	100	100	100	100	100	100	100	100	100	100	100	100	100	100	100	100	100	100	100	100	100	100	100	100	100	100	100	100	100	100	100	100	100	100	100	100	100	100	100	100	100	100	100
31780	100	100	100	100	100	100	100	100	100	100	100	100	100	100	100	100	100	100	100	100	100	100	100	100	100	100	100	100	100	100	100	100	100	100	100	100	100	100	100	100	100	100	100	100	100	100	100	100	100
31800	100	100	100	100	100	100	100	100	100	100	100	100	100	100	100	100	100	100	100	100	100	100	100	100	100	100	100	100	100	100	100	100	100	100	100	100	100	100	100	100	100	100	100	100	100	100	100	100	100
31820	100	100	100	100	100	100	100	100	100	100	100	100	100	100	100	100	100	100	100	100	100	100	100	100	100	100	100	100	100	100	100	100	100	100	100	100	100	100	100	100	100	100	100	100	100	100	100	100	100
31840	100	100	100	100	100	100	100	100	100	100	100	100	100	100	100	100	100	100	100	100	100	100	100	100	100	100	100	100	100	100	100	100	100	100	100	100	100	100	100	100	100	100	100	100	100	100	100	100	100
31860	100	100	100	100	100	100	100	100	100	100	100	100	100	100	100	100	100	100	100	100	100	100	100	100	100	100	100	100	100	100	100	100	100	100	100	100	100	100	100	100	100	100	100	100	100	100	100	100	100
31880	100	100	100	100	100	100	100	100	100	100	100	100	100	100	100	100	100	100	100	100	100	100	100	100	100	100	100	100	100	100	100	100	100	100	100	100	100	100	100	100	100	100	100	100	100	100	100	100	100
31900	100	100	100	100	100	100	100	100	100	100	100	100	100	100	100	100	100	100	100	100	100	100	100	100	100	100	100	100	100	100	100	100	100	100	100	100	100	100	100	100	100	100	100	100	100	100	100	100	100
31920	100	100	100	100	100	100	100	100	100	100	100	100	100	100	100	100	100	100	100	100	100	100	100	100	100	100	100	100	100	100	100	100	100	100	100	100	100	100	100	100	100	100	100	100	100	100	100	100	100
31940	100	100	100	100	100	100	100	100	100	100	100	100	100	100	100	100	100	100	100	100	100	100	100	100	100	100	100	100	100	100	100	100	100	100	100	100	100	100	100	100	100	100	100	100	100	100	100	100	100
31960	100	100	100	100	100	100	100	100	100	100	100	100	100	100	100	100	100	100	100	100	100	100	100	100	100	100	100	100	100	100	100	100	100	100	100	100	100	100	100	100	100	100	100	100	100	100	100	100	100
31980	100	100	100	100	100	100	100	100	100	100	100	100	100	100	100	100	100	100	100	100	100	100	100	100	100	100	100	100	100	100	100	100	100	100	100	100	100	100	100	100	100	100	100	100	100	100	100	100	100
32000	100	100	100	100	100	100	100	100	100	100	100	100	100	100	100	100	100	100	100	100	100	100	100	100	100	100	100	100	100	100	100	100	100	100	100	100	100	100	100	100	100	100	100	100	100	100	100	100	100
32020	100	100	100	100	100	100	100	100	100	100	100	100	100	100	100	100	100	100	100	100	100	100	100	100	100	100	100	100	100	100	100	100	100	100	100	100	100	100	100	100	100	100	100	100	100	100	100	100	100
32040	100	100	100	100	100	100	100	100	100	100	100	100	100	100	100	100	100	100	100	100	100	100	100	100	100	100	100	100	100	100	100	100	100	100	100	100	100	100	100	100	100	100	100	100	100	100	100	100	100
32060	100	100	100	100	100	100	100	100	100	100	100	100	100	100	100	100	100	100	100	100	100	100	100	100	100	100	100	100	100	100	100	100	100	100	100	100	100	100	100	100	100	100	100	100	100	100	100	100	100
32080	100	100	100	100	100	100	100	100	100	100	100	100	100	100	100	100	100	100	100	100	100	100	100	100	100	100	100	100	100	100	100	100	100	100	100	100	100	100	100	100	100	100	100	100	100	100	100	100	100
32100	100	100	100	100	100	100	100	100	100	100	100	100	100	100	100	100	100	100	100	100	100	100	100	100	100	100	100	100	100	100	100	100	100	100	100	100	100	100	100	100	100	100	100	100	100	100	100	100	100
32120	100	100	100	100	100	100	100	100	100	100	100	100	100	100	100	100	100	100	100	100	100	100	100	100	100	100	100	100	100	100	100	100	100	100	100	100	100	100	100	100	100	100	100	100	100	100	100	100	100
32140	100	100	100	100	100	100	100	100	100	100	100	100	100	100	100	100	100	100	100	100	100	100	100	100	100	100	100	100	100	100	100	100	100	100	100	100	100	100	100	100	100	100	100	100	100	100	100	100	100
32160	100	100	100	100	100	100	100	100	100	100	100	100	100	100	100	100	100	100	100	100	100	100	100	100	100	100	100	100	100	100	100	100	100	100	100	100	100	100	100	100	100	100	100	100	100	100	100	100	100
32180	100	100	100	100	100	100	100	100	100	100	100	100	100	100	100	100	100	100	100	100	100	100	100	100	100	100	100	100	100	100	100	100	100	100	100	100	100	100	100	100	100	100	100	100	100	100	100	100	100
32200	100	100	100	100	100	100	100	100	100	100	100	100	100	100	100	100	100	100	100	100	100	100	100	100	100	100	100	100	100	100	100	100	100	100	100	100	100	100	100	100	100	100	100	100	100	100	100	100	100
32220	100	100	100	100	100	100	100	100	100	100	100	100	100	100	100	100	100	100	100	100	100	100	100	100	100	100	100	100	100	100	100	100	100	100	100	100	100	100	100	100	100	100	100	100	100	100	100	100	100
32240	100	100	100	100	100	100	100	100	100	100	100	100	100	100	100	100	100	100	100	100	100	100	100	100	100	100	100	100	100	100	100	100	100	100	100	100	100	100	100	100	100	100	100	100	100	100	100	100	100
32260	100	100	100	100	100	100	100	100	100	100	100	100	100	100	100	100	100	100	100	100	100	100	100	100	100	100	100	100	100	100	100	100	100	100	100	100	100	100	100	100	100	100	100	100	100	100	100	100	100
32280	100	100	100	100	100	100	100	100	100	100	100	100	100	100	100	100	100	100	100	100	100	100	100	100	100	100	100	100	100	100	100	100	100	100	100	100	100	100	100	100	100	100	100	100	100	100	100	100	100
32300	100	100	100	100	100	100	100	100	100	100	100	100	100	100	100	100	100	100	100	100	100	100	100	100	100	100	100	100	100	100	100	100	100	100	100	100	100	100	100	100	100	100	100	100	100	100	100	100	100
32320	100	100	100	100	100	100	100	100	100	100	100	100	100	100	100	100	100	100	100	100	100	100	100	100	100	100	100	100	100	100	100	100	100	100	100	100	100	100	100	100	100	100	100	100	100	100	100	100	100
32340	100	100	100	100	100	100	100	100	100	100	100	100	100	100	100	100	100	100	100	100	100	100	100	100	100	100	100	100	100	100	100	100	100	100	100	100	100	100	100	100	100	100	100	100	100	100	100	100	100
32360	100	100	100	100	100	100	100	100	100	100	100	100	100	100	100	100	100	100	100	100	100	100	100	100	100	100	100	100	100	100	100	100	100	100	100	100	100	100	100	100	100	100	100	100	100	100	100	100	100
32380	100	100	100	100	100	100	100	100	100	100	100	100	100	100	100	100	100	100	100	100	100	100	100	100	100	100	100	100	100	100	100	100	100	100	100	100	100	100	100	100	100	100	100	100	100	100	100	100	100
32400	100	100	100	100	100	100	100	100	100	100	100	100	100	100	100	100	100	100	100	100	100	100	100	100	100	100	100	100	100	100	100	100	100	100	100	100	100	100	100	100	100	100	100	100	100	100	100	100	100
32420	100	100	100	100	100	100	100	100	100	100	100	100	100	100	100	100	100	100	100	100	100	100	100	100	100	100	100	100	100	100	100	100	100	100	100	100	100	100	100	100	100	100	100	100	100	100	100	100	100
32440	100	100	100	100	100	100	100	100	100	100	100	100	100	100	100	100	100	100	100	100	100	100	100	100	100	100	100	100	100	100	100	100	100	100	100	100	100	100	100	100	100	100	100	100	100	100	100	100	100
32460	100	100	100	100	100	100	100	100	100	100	100	100	100	100	100	100	100	100	100	100	100	100	100	100	100	100	100	100	100	100	100	100	100	100	100	100	100	100	100	100	100	100	100	100	100	100	100	100	100
32480	100	100	100	100	100	100	100	100	100	100	100	100	100	100	100	100	100	100	100	100	100	100	100	100	100	100	100	100	100	100	100	100	100	100	100	100	100	100	100	100	100	100	100	100	100	100	100	100	100
32500	100	100	100	100	100	100	100	100	100	100	100	100	100	100	100	100	100	100	100	100	100	100	100	100	100	100	100	100	100	100	100	100	100	100	100	100	100	100	100	100	100	100	100	100	100	100	100	100	100
32520	100	100	100	100	100	100	100	100	100	100	100	100	100	100	100	100	100	100	100	100	100	100	100	100	100	100	100	100	100	100	100	100	100	100	100	100	100	100	100	100	100	100	100	100	100	100	100	100	100
32540	100	100	100	100	100	100	100	100	100	100	100	100	100	100	100	100	100	100	100	100	100	100	100	100	100	100	100	100	100	100	100	100	100	100	100	100	100	100	100	100	100	100	100	100	100	100	100	100	100
32560	100	100	100	100	100	100	100	100	100	100	100	100	100	100	100	100	100	100	100	100	100	100	100	100	100	100	100	100	100	100	100	100	100	100	100	100	100	100	100	100	100	100	100	100	100	100	100	100	100
32580	100	100	100	100	100	100	100	100	100	100	100	100	100	100	100	100	100	100	100	100	100	100	100	100	100	100	100	100	100	100	100	100	100	100	100	100	100	100	100	100	100	100	100	100	100	100	100	100	100
32600	100	100	100	100	100	100	100	100	100	100	100	100	100	100	100	100	100	100	100	100	100	100	100	100	100	100	100	100	100	100	100	100	100	100	100	100	100	100	100	100	100	100	100	100	100	100	100	100	100
32620	100	100	100	100	100	100	100	100	100	100	100	100	100	100	100	100	100	100	100	100	100	100	100	100	100	100	100	100	100	100	100	100	100	100	100	100	100	100	100	100	100	100	100	100	100	100	100	100	100
32640	100	100	100	100	100	100	100	100	100	100	100	100	100	100	100	100	100	100	100	100	100	100	100	100	100	100	100	100	100	100	100	100	100	100	100	100	100	100	100	100	100	100	100	100	100	100	100	100	100
32660	100	100	100	100	100	100	100	100	100	100	100	100	100	100	100	100	100	100	100	100	100	100	100	100	100	100	100	100	100	100	100	100	100	100	100	100	100	100	100	100	100	100	100	100	100	100	100	100	100
32680	100	100	100	100	100	100	100	100	100	100	100	100	100	100	100	100	100	100	100	100	100	100	100	100	100	100	100	100	100	100	100	100	100	100	100	100	100	100	100	100	100	100	100	100	100	100	100	100	100
32700	100	100	100	100	100	100	100	100	100	100	100	100	100	100	100	100	100	100	100	100	100	100	100	100	100	100	100	100	100	100	100	100	100	100	100	100	100	100	100	100	100	100	100	100	100	100	100	100	100
32720	100	100	100	100	100	100	100	100	100	100	100	100	100	100	100	100	100	100	100	100	100	100	100	100	100	100	100	100	100	100	100	100	100	100	100	100	100	100	100	100	100	100	100	100	100	100	100	100	100
32740	100	100	100	100	100	100	100	100	100	100	100	100	100	100	100	100	100	100	100	100	100	100	100	100	100	100	100	100	100	100	100	100	100	100	100	100	100	100	100	100	100	100	100	100	100	100	100	100	100
32760	100	100	100	100	100	100	100	100	100	100	100	100	100	100	100	100	100	100	100	100	100	100	100	100	100	100	100	100	100	100	100	100	100	100	100	100	100	100	100	100	100	100	100	100	100	100	100	100	100
32780	100	100	100	100	100	100	100	100	100	100	100	100	100	100	100	100	100	100	100	100	100	100	100	100	100	100	100	100	100	100	100	100	100	100	100	100	100	100	100	100	100	100	100	100	100	100	100	100	100
32800	100	100	100	100	100	100	100	100	100	100	100	100	100	100	100	100	100	100	100	100	100	100	100	100	100	100	100	100	100	100	100	100	100	100	100	100	100	100	100	100	100	100	100	100	100	100	100	100	100
32820	100	100	100	100	100	100	100	100	100	100	100	100	100	100	100	100	100	100	100	100	100	100	100	100	100	100	100	100	100	100	100	100	100	100	100	100	100	100	100	100	100	100	100	100	100	100	100	100	100
32840	100	100	100	100	100	100	100	100	100	100	100	100	100	100	100	100	100	100	100	100	100	100	100	100	100	100	100	100	100	100	100	100	100	100	100	100	100	100	100	100	100	100	100	100	100	100	100	100	100
32860	100	100	100	100	100	100	100	100	100	100	100	100	100	100	100	100	100	100	100	100	100	100	100	100	100	100	100	100	100	100	100	100	100	100	100	100	100	100	100	100	100	100	100	100	100	100	100	100	100
32880	100	100	100	100	100	100	100	100	100	100	100	100	100	100	100	100	100	100	100	100	100	100	100	100	100	100	100	100	100	100	100	100	100	100	100	100	100	100	100	100	100	100	100	100	100	100	100	100	100
32900	100	100	100	100	100	100	100	100	100	100	100	100	100	100	100	100	100	100	100	100	100	100	100	100	100	100	100	100	100	100	100	100	100	100	100	100	100	100	100	100	100	100	100	100	100	100	100	100	100
32920	100	100	100	100	100	100	100	100	100	100	100	100	100	100	100	100	100	100	100	100	100	100	100	100	100	100	100	100	100	100	100	100	100	100	100	100	100	100	100	100	100	100	100	100	100	100	100	100	100
32940	100	100	100	100	100	100	100	100	100	100	100	100	100	100	100	100	100	100	100	100	100	100	100	100	100	100	100	100	100	100	100	100	100	100	100	100	100	100	100	100	100	100	100	100	100	100	100	100	100
32960	100	100	100	100	100	100	100	100	100	100	100	100	100	100	100	100	100	100	100	100	100	100	100	100	100	100	100	100	100	100	100	100	100	100	100	100	100	100	100	100	100	100	100	100	100	100	100	100	100
32980	100	100	100	100	100	100	100	100	100	100	100	100	100	100	100	100	100	100	100	100	100	100	100	100	100	100	100	100	100	100	100	100	100	100	100	100	100	100	100	100	100	100	100	100	100	100	100	100	100
33000	100	100	100	100	100	100	100	100	100	100	100	100	100	100	100	100	100	100	100	100	100	100	100	100	100	100	100	100	100	100	100	100	100	100	100	100	100	100	100	100	100	100	100	100	100	100	100	100	100
33020	100	100	100	100	100	100	100	100	100	100	100	100	100	100	100	100	100	100	100	100	100	100	100	100	100	100	100	100	100	100	100	100	100	100	100	100	100	100	100	100	100	100	100	100	100	100	100	100	100
33040	100	100	100	100	100	100	100	100	100	100	100	100	100	100	100	100	100	100	100	100	100	100	100	100	100	100	100	100	100	100	100	100	100	100	100	100	100	100	100	100	100	100	100	100	100	100	100	100	100
33060	100	100	100	100	100	100	100	100	100	100	100	100	100	100	100	100	100	100	100	100	100	100	100	100	100	100	100	100	100	100	100	100	100	100	100	100	100	100	100	100	100	100	100	100	100	100	100	100	100
33080	100	100	100	100	100	100	100	100	100	100	100	100	100	100	100	100	100	100	100	100	100	100	100	100	100	100	100	100	100	100	100	100	100	100	100	100	100	100	100	100	100	100	100	100	100	100	100	100	100
[truncated: 346 more rows]
[truncated: 17 more columns]

## Sheet: Fig 4 G cumulative
	Figure 4 G– Source data for cumulative mEPSC amplitude
interval	wild type																																	Rai14+/-
[truncated: 141 more rows]
[truncated: 17 more columns]

## Sheet: Fig 4 I–K Morris water maze 
	Figure 4 I–K Source data for Morris water maze test
[truncated: 23 more rows]

[truncated: 1 more sheets: Fig 4 M–N Fear conditioning]
