# Supplementary material for: Retinoic acid-induced protein 14 controls dendritic spine dynamics associated with depressive-like behaviors
Source: eLife. 2022 Apr 25;11:e77755. doi: 10.7554/eLife.77755 (PMC9068211; doi:10.7554/eLife.77755)
Supplement: Figure 5—source data 1. [file elife-77755-fig5-data1.xlsx]

## Sheet: Fig 5 A
Figure 5 A Source data for RNA sequencing
Gene_Symbol	WT_F-1	WT_F-2	WT_M-1	WT_M-2	het_F-1	het_F-2	het_M-1	het_M-2	Mean
Adam5	2.18357	2.1906	2.16622	2.19447	2.16025	2.17611	2.16252	2.15817	2.17399
Adh1	2.51399	2.50779	2.48837	2.49516	2.50966	2.62555	2.50891	2.50959	2.51988
Aqp1	2.91019	2.82279	2.91419	2.85075	2.88728	3.15361	2.86911	2.9918	2.92496
Rhod	2.46296	2.44422	2.43909	2.4596	2.47124	2.55389	2.45571	2.45058	2.46716
Atf3	2.72762	2.74771	2.69568	2.74117	2.72182	2.79488	2.74227	2.87573	2.75586
Prdm1	2.64232	2.63454	2.63796	2.63304	2.64694	2.67774	2.65668	2.72512	2.65679
Brs3	2.39351	2.47206	2.39528	2.4109	2.37361	2.38442	2.39435	2.38278	2.40086
Runx1	2.71046	2.71319	2.70571	2.70369	2.71428	2.86748	2.68581	2.73116	2.72897
Cd72	2.34037	2.35512	2.33998	2.34192	2.37239	2.37772	2.38646	2.36814	2.36026
Ccr3	0.483126	0.474382	0.474334	0.474725	0.496073	0.503691	0.495717	0.485507	0.485944
Cntf	2.55624	2.55683	2.54709	2.58773	2.51328	2.53139	2.50564	2.50899	2.5384
Col17a1	2.56174	2.57986	2.57003	2.55783	2.57137	2.63805	2.61999	2.59605	2.58686
Col4a3	2.59517	2.64095	2.60584	2.60469	2.58251	2.58183	2.56472	2.57385	2.5937
Dao	2.38879	2.4133	2.37616	2.36814	2.36237	2.34036	2.31948	2.32084	2.36118
Dnah11	2.98533	3.00773	2.9596	3.02362	2.96387	3.24689	2.91673	3.21292	3.03958
Fap	2.79972	2.74701	2.78963	2.74625	2.76958	2.8933	2.80157	2.80794	2.79438
Gcnt1	2.95088	2.93746	2.93554	2.93478	2.94569	3.07507	2.95481	3.12211	2.98204
Glra1	3.05264	3.11638	3.04371	3.07807	3.03715	3.02255	2.89627	2.92905	3.02198
Gzma	1.3875	1.38736	1.39602	1.38784	1.38752	1.48142	1.39712	1.39398	1.40235
H2-DMb2	2.45713	2.45676	2.45837	2.46308	2.46477	2.55455	2.4842	2.48311	2.47775
H2-Q4	3.06425	3.04996	3.048	3.06499	3.07623	3.23879	3.05973	3.09117	3.08664
Hoxa2	0.927442	0.927704	0.889608	0.908887	0.889773	0.889561	0.889749	0.890109	0.901604
Hoxa3	1.43166	1.5103	1.41005	1.41063	1.41028	1.40999	1.41025	1.41076	1.42549
Hoxa4	1.71466	1.82508	1.6918	1.69259	1.69212	1.69171	1.69208	1.69276	1.7116
Hoxc5	1.10457	1.14711	1.08942	1.08202	1.08175	1.08658	1.08172	1.08212	1.09441
Hoxd3	1.35628	1.38639	1.32025	1.32661	1.3255	1.32019	1.32043	1.32087	1.33457
Hpse	2.57206	2.5421	2.56749	2.56274	2.57261	2.6136	2.59587	2.62224	2.58109
Ifit1	3.02115	3.03029	3.00787	3.06933	3.04352	3.34885	3.00986	3.10402	3.07936
Jchain	2.57793	2.59592	2.57776	2.58684	2.59898	2.73409	2.56866	2.59963	2.60498
Il18rap	1.63385	1.6312	1.62365	1.63364	1.62796	1.68102	1.63958	1.65763	1.64107
Irx1	2.91018	2.91652	2.86977	2.90788	2.86716	2.87469	2.7754	2.79104	2.86408
Kcnq1	2.38254	2.3855	2.38909	2.36961	2.40082	2.45119	2.41171	2.39509	2.39819
Klrc1	0.848441	0.848337	0.848285	0.848713	0.848457	0.922878	0.848433	0.8698	0.860418
Lmx1b	2.70722	2.71067	2.70918	2.70462	2.69314	2.68006	2.61956	2.62289	2.68092
Ltbp2	2.64102	2.64012	2.62529	2.64979	2.63496	2.78079	2.65975	2.74239	2.67176
Mep1a	0.21014	0.197531	0.163146	0.176147	0.163309	0.1631	0.163285	0.163641	0.175037
Mid1	3.03646	3.00338	3.01241	3.04686	3.04242	3.3108	3.10856	3.10757	3.08356
Mki67	2.83748	2.81202	2.81016	2.8422	2.83028	2.9668	2.87054	2.86749	2.85462
Grap2	2.14997	2.16226	2.16124	2.15139	2.15551	2.1952	2.1691	2.18609	2.16634
Mx2	2.70661	2.70828	2.70879	2.69775	2.69896	2.87041	2.71257	2.7381	2.73018
Olfr32	0.894127	0.894025	0.893974	0.894392	0.894143	0.924433	0.894119	0.959172	0.906048
Pax2	2.03939	2.026	1.99381	2.01197	2.00313	1.98931	1.99984	1.98623	2.00621
Pde1c	3.26357	3.33259	3.27374	3.27102	3.30069	3.4802	3.29294	3.36594	3.32259
Phex	2.55541	2.59763	2.54976	2.55741	2.55873	2.65395	2.60286	2.60737	2.58539
Lilra6	-0.0693541	-0.0694574	-0.0695087	-0.0690857	-0.0440942	-0.0320149	-0.056819	-0.0457415	-0.0570094
S100a5	2.51128	2.5126	2.50523	2.5208	2.52549	3.10414	2.51096	2.94765	2.64227
S100a9	2.31315	2.35041	2.31956	2.32213	2.31976	2.55665	2.33478	2.3874	2.36298
Spint1	2.7972	2.8264	2.804	2.79263	2.82638	2.93511	2.8599	2.83027	2.83399
Sycp3	1.90496	1.90576	1.9203	1.89952	1.88809	1.8875	1.88787	1.88925	1.89791
Tfap2c	2.1334	2.13664	2.14256	2.13567	2.13798	2.17086	2.14484	2.24459	2.15582
Tcp10b	2.166	2.17134	2.15282	2.1614	2.19843	2.17031	2.17936	2.18826	2.17349
Cd40	2.27724	2.28872	2.28118	2.27305	2.28932	2.34431	2.29214	2.29305	2.29238
Tnfsf10	2.94273	2.94275	2.94121	2.96063	2.98025	3.15287	2.99696	2.95656	2.98425
Tyr	1.57711	1.56481	1.5757	1.5653	1.59101	1.57699	1.60536	1.59239	1.58109
Ccn4	2.88146	2.84964	2.86353	2.85475	2.90578	2.9293	2.90814	3.05523	2.90598
Ikzf3	2.1226	2.13306	2.11421	2.1109	2.13449	2.14463	2.15303	2.12965	2.13032
Gdf15	0.302006	0.272326	0.290185	0.318399	0.27244	0.272231	0.272417	0.272773	0.284097
Mab21l2	2.82711	2.86657	2.82694	2.81738	2.80625	2.80399	2.72529	2.74215	2.80196
Oas1b	2.50079	2.50186	2.49109	2.51986	2.51398	2.60984	2.49855	2.52717	2.52039
Klrk1	1.25658	1.25645	1.25639	1.2569	1.26461	1.34809	1.26705	1.25701	1.27039
Atp1a4	2.20056	2.12527	2.21631	2.21341	2.12562	2.12498	2.12555	2.12664	2.15729
Cabp5	1.7506	1.7379	1.74912	1.74902	1.76792	1.78579	1.75226	1.76042	1.75663
Postn	2.96231	2.9937	2.96009	2.97056	2.96539	3.17419	2.99359	3.01769	3.00469
Magix	2.38106	2.37461	2.40194	2.37248	2.38714	2.49823	2.40687	2.38387	2.40077
Cxcl11	1.64846	1.64014	1.64351	1.63693	1.64663	1.71324	1.64644	1.65649	1.65398
Sinhcaf	2.68841	2.66436	2.66574	2.70059	2.69218	2.81687	2.69483	2.67704	2.7
Clec4n	2.01016	1.99322	1.99423	2.00796	2.01187	2.04059	2.02113	2.00745	2.01083
Stap1	2.08044	2.07659	2.07959	2.0918	2.08914	2.26074	2.08382	2.10856	2.10883
Aldh1a3	2.56589	2.53444	2.53676	2.53405	2.55156	2.61574	2.59338	2.58699	2.56485
Olfr140	0.913459	0.913351	0.913297	0.913739	0.913476	1.00214	0.91345	0.922051	0.92562
Kcne3	1.7052	1.70085	1.70716	1.69881	1.70902	1.74512	1.71939	1.71059	1.71202
Fam129a	2.90563	2.94323	2.90001	2.91393	2.9452	3.10518	2.89742	2.93364	2.94303
Rtp4	2.92202	2.89207	2.91293	2.94749	2.94849	3.09321	2.91352	2.91806	2.94347
Pclaf	2.26135	2.26219	2.26027	2.28166	2.26282	2.32019	2.29	2.29588	2.2793
Ppifos	0.974718	0.974611	0.974557	0.974997	1.01168	0.974506	1.03644	0.975098	0.987076
Scgb3a1	1.67318	1.67301	1.68572	1.67363	1.68148	1.78623	1.68727	1.67379	1.69179
Prss56	2.06185	2.06155	2.06888	2.06262	2.08766	2.06562	2.12982	2.19631	2.09179
Rsc1a1	2.7277	2.73693	2.72335	2.67869	2.71023	2.73135	2.96051	2.77135	2.75501
Kif18b	2.10943	2.10668	2.1084	2.11016	2.10282	2.13613	2.13448	2.13484	2.11787
Ly6g6e	2.73729	2.6864	2.72751	2.71185	2.71882	2.73445	2.77072	2.85298	2.7425
Mmrn1	1.51793	1.52605	1.51771	1.5183	1.5356	1.60987	1.51791	1.52935	1.53409
Ppm1j	2.56005	2.55468	2.55292	2.53678	2.55772	2.57678	2.54913	2.69206	2.57251
Apol9b	2.15592	2.13321	2.14114	2.14252	2.14903	2.27556	2.13835	2.15594	2.16146
Esco2	1.8895	1.88547	1.88938	1.89587	1.89126	1.92005	1.9033	1.90829	1.89789
Lrrc8e	1.46802	1.47651	1.4678	1.46839	1.47274	1.56828	1.47946	1.46852	1.48372
Fam186a	2.06653	2.08199	2.06364	2.07093	2.0948	2.09222	2.08528	2.08529	2.08009
1700108F19Rik	0.0109918	0.0108907	0.0108404	0.0112545	0.0110073	0.0560368	0.040195	0.0333084	0.0230656
Sult6b1	1.40426	1.40172	1.40165	1.40219	1.40187	1.48635	1.41364	1.42261	1.41679
Fam83e	2.11277	2.11783	2.11714	2.10366	2.12883	2.28112	2.11751	2.10397	2.13535
4930455C13Rik	0.302314	0.27213	0.257981	0.293304	0.258144	0.257935	0.258121	0.258476	0.269801
4931429L15Rik	0.672493	0.680801	0.676304	0.646486	0.646254	0.646053	0.646232	0.646575	0.65765
Igfbpl1	2.7115	2.69723	2.71076	2.69992	2.69879	2.69237	2.76757	2.83161	2.72622
Tex29	1.85075	1.86217	1.85045	1.85127	1.85802	1.95132	1.86652	1.89102	1.87269
Depdc1a	1.49569	1.49758	1.4955	1.50851	1.50858	1.53264	1.53037	1.51943	1.51104
Trdn	2.3028	2.33849	2.32879	2.30032	2.31172	2.32283	2.31415	2.49321	2.33904
Urah	2.37948	2.35844	2.36633	2.3691	2.37988	2.47366	2.40004	2.3749	2.38773
4831407H17Rik	1.58446	1.59335	1.58709	1.57749	1.56059	1.5674	1.56667	1.57604	1.57664
Sla2	2.17774	2.16876	2.17176	2.18781	2.19422	2.18763	2.21724	2.19407	2.1874
Lhx1os	2.56432	2.58314	2.56086	2.59144	2.56579	2.54683	2.51963	2.51113	2.55539
Fgf16	2.35577	2.36504	2.34421	2.36371	2.36282	2.37156	2.3697	2.42855	2.37017
C1qtnf3	1.88127	1.89618	1.87571	1.88061	1.87045	1.86802	1.86858	1.87035	1.8764
Tmem40	2.56847	2.57479	2.59011	2.53663	2.58256	2.55622	2.64212	2.65832	2.58865
Hoxb2	1.17214	1.2214	1.14444	1.14491	1.14463	1.14439	1.1446	1.14502	1.15769
Slc6a5	2.94728	3.21874	2.86124	2.95611	2.9104	2.81845	2.74486	2.76248	2.90245
AU040972	2.31974	2.31684	2.31979	2.33154	2.332	2.49337	2.33652	2.31694	2.34584
Fam110c	1.92562	1.92947	1.92597	1.93144	1.92236	2.01448	1.92555	1.94978	1.94058
AW112010	2.58984	2.58983	2.57748	2.58454	2.60915	2.73882	2.59774	2.58352	2.60887
Gimap4	2.20904	2.22378	2.20737	2.21034	2.23969	2.30858	2.2245	2.22257	2.23073
Osr2	0.357783	0.357685	0.357636	0.358038	0.357798	0.389788	0.3672	0.409013	0.369368
Gcm2	0.685353	0.662162	0.661606	0.674894	0.647996	0.647791	0.647973	0.648323	0.659512
D730005E14Rik	1.83841	1.83096	1.83243	1.84851	1.84381	1.92264	1.83304	1.85583	1.8507
Psg29	1.84356	1.84939	1.84694	1.86031	1.83725	1.83334	1.83534	1.83094	1.84213
Sp7	2.88514	2.8994	2.88362	2.83625	2.88374	2.93214	2.8781	3.07436	2.90909
Cdhr1	3.24555	3.27733	3.29524	3.27241	3.27601	3.42064	3.26895	3.58516	3.33016
Erdr1	2.66125	2.65847	2.65706	2.66812	2.66167	3.04047	3.06221	3.0632	2.80906
Cnksr1	2.17997	2.17059	2.17861	2.1717	2.17752	2.27382	2.17171	2.19541	2.18991
Gm4759	0.573694	0.573599	0.573552	0.573941	0.573709	0.636201	0.581697	0.593757	0.585019
Scgn	2.64964	2.6516	2.64568	2.63591	2.62188	2.78518	2.63752	2.88059	2.6885
A3galt2	2.34454	2.3457	2.34254	2.35358	2.34826	2.41436	2.35104	2.37226	2.35903
Tph2	3.16744	3.1124	3.14713	2.93772	3.05912	2.95787	2.89468	2.89118	3.02094
Spata20	1.69436	1.67712	1.69831	1.67608	1.65813	1.67091	1.66939	1.65862	1.67537
Llgl2	2.68789	2.69643	2.69687	2.66824	2.68769	2.90573	2.69618	2.65594	2.71187
Myo15b	2.36213	2.34529	2.36718	2.35813	2.35924	2.39436	2.39769	2.38257	2.37082
Gm4804	2.08136	2.09451	2.08501	2.07795	2.06397	2.06635	2.0623	2.07462	2.07576
Baz1a	2.94911	2.95085	2.91299	2.91034	2.97039	3.06739	2.94058	2.99651	2.96227
Pde6a	1.93549	1.92651	1.94172	1.95218	1.91732	1.91831	1.92639	1.92009	1.92975
Arhgef39	2.3962	2.42783	2.40325	2.38918	2.42265	2.40757	2.46592	2.43237	2.41812
Acnat1	2.25594	2.23824	2.25085	2.26035	2.27966	2.40108	2.24608	2.25354	2.27322
Clec12a	2.36417	2.3863	2.36776	2.38323	2.38173	2.42668	2.44044	2.4161	2.3958
Neil3	1.88802	1.8903	1.8927	1.89365	1.89932	1.92207	1.91104	1.9134	1.90131
Nrn1l	2.55979	2.56735	2.55127	2.54452	2.54594	2.70596	2.59485	2.57083	2.58006
Fam240a	0.143392	0.143293	0.143244	0.143649	0.17578	0.175598	0.159532	0.15718	0.155209
Otop2	2.55451	2.5464	2.57212	2.54618	2.57976	2.55276	2.61041	2.74645	2.58857
Macc1	2.00052	1.9845	2.00003	1.98532	2.00071	2.06237	1.99735	2.04915	2.00999
Slc4a9	1.98116	1.99084	1.98823	1.97971	1.97714	1.96439	1.96196	1.96488	1.97604
Slco5a1	3.03496	3.11598	3.05226	3.03323	3.07725	3.08203	3.1265	3.26191	3.09802
Padi6	2.10665	2.09304	2.11213	2.0985	2.1097	2.10638	2.17942	2.13897	2.1181
Ano2	3.12938	3.21875	3.15421	3.13199	3.1783	3.40982	3.24024	3.21076	3.20918
Nlrp10	1.9625	1.9486	1.95162	1.95353	1.96267	1.96462	1.98305	2.06592	1.97406
Ces1a	1.80096	1.80077	1.81079	1.80147	1.8086	1.9151	1.81211	1.82641	1.82203
Tbx22	1.50622	1.49735	1.50287	1.49379	1.51469	1.5043	1.53394	1.51724	1.5088
Klhl34	2.09168	2.07974	2.09637	2.08162	2.1089	2.09875	2.09942	2.11472	2.0964
Fat2	2.87486	3.0309	2.7618	2.96144	2.83218	2.84743	2.76576	2.77996	2.85679
Olfr1463	0.936104	0.935997	0.935944	0.936383	0.936121	1.01365	0.936095	0.956314	0.948326
Olfr110	1.18069	1.18058	1.18052	1.18099	1.19975	1.25018	1.18068	1.1978	1.1939
Olfr1259	0.913459	0.913351	0.913297	0.913739	0.913476	1.00214	0.91345	0.922051	0.92562
Olfr1370	0.830327	0.830223	0.830171	0.830598	0.830343	0.908303	0.830318	0.847789	0.842259
Olfr920	1.73099	1.73679	1.7247	1.72031	1.7454	1.77706	1.73803	1.73411	1.73842
Olfr131	0.891624	0.891518	0.891466	0.8919	0.891641	0.971514	0.891616	0.908427	0.903713
Olfr1336	0.843441	0.843336	0.843283	0.843714	0.843457	0.925962	0.843432	0.856606	0.855404
Slc4a11	2.66985	2.69163	2.677	2.68361	2.67675	2.85183	2.72221	2.70739	2.71003
C2cd4d	2.07124	2.08272	2.08133	2.08228	2.05766	2.07208	2.05315	2.06469	2.07064
Slfn8	2.763	2.75675	2.75217	2.78863	2.75824	2.94626	2.78	2.81202	2.79463
Igf2bp2	2.66673	2.69534	2.67858	2.66674	2.68577	2.77441	2.68324	2.73075	2.69769
Egfros	1.1023	1.13091	1.11295	1.09523	1.09968	1.08812	1.08831	1.08869	1.10077
B230323A14Rik	2.63724	2.66976	2.61727	2.64484	2.63287	2.61725	2.57118	2.58662	2.62213
Sp8	2.86237	2.8804	2.86254	2.83394	2.85222	2.99569	2.94747	3.21411	2.93109
9330175E14Rik	0.76254	0.762439	0.762388	0.762803	0.769873	0.83264	0.769735	0.771845	0.774283
Abi3bp	3.20668	3.24158	3.21662	3.1549	3.23562	3.21921	3.40248	3.45557	3.26658
Tmem154	2.40533	2.42139	2.4027	2.43139	2.42032	2.52768	2.41536	2.43763	2.43273
Gabrr3	0.544515	0.552156	0.544371	0.544767	0.557047	0.565623	0.564884	0.575023	0.556048
Cndp1	2.20381	2.20572	2.20135	2.20057	2.20661	2.24305	2.20868	2.25145	2.21515
Obp2b	2.11511	2.10988	2.11341	2.12948	2.12246	2.21421	2.12209	2.126	2.13158
Gm5398	1.30328	1.30284	1.30481	1.30444	1.33411	1.30873	1.3245	1.3138	1.31206
Ugt1a1	1.78899	1.78879	1.79214	1.78949	1.79288	1.80008	1.893	1.83358	1.80987
Agr3	1.92921	1.92892	1.92878	1.92994	1.92925	2.10804	1.92918	1.96188	1.95565
Smim22	1.03155	1.03145	1.0314	1.03182	1.06057	1.07528	1.03154	1.05693	1.04382
Gm5524	-0.766487	-0.766617	-0.766682	-0.766147	-0.705999	-0.748993	-0.746169	-0.740782	-0.750984
Chrna10	2.24303	2.25585	2.26376	2.24854	2.25205	2.27199	2.26828	2.41115	2.27683
Olfr111	2.06595	2.07714	2.06853	2.0649	2.07053	2.08508	2.09356	2.13782	2.08294
Hpse2	2.06521	2.06956	2.065	2.07609	2.08499	2.13082	2.07774	2.07399	2.08043
Arhgap40	2.29649	2.31437	2.30831	2.30552	2.30835	2.4949	2.33315	2.32024	2.33517
Nme9	2.17998	2.18923	2.18119	2.22258	2.16056	2.19159	2.16033	2.15715	2.18033
Gbp10	2.69509	2.71195	2.69482	2.74638	2.70235	3.01826	2.69363	2.7731	2.75445
Epp13	0.106113	0.103805	0.102654	0.0728981	0.0726563	0.0724464	0.072633	0.0729904	0.0845246
Mif-ps9	-0.338612	-0.338723	-0.338779	-0.338322	-0.286196	-0.319118	-0.323498	-0.319429	-0.325335
Gm44505	2.10654	2.10627	2.10613	2.10726	2.17765	2.14157	2.16633	2.18114	2.13661
Gm12917	1.80684	1.8127	1.82266	1.81219	1.82546	1.82884	1.82984	1.83306	1.82145
Igkv10-96	1.14145	1.14134	1.14128	1.14175	1.21487	1.17218	1.14144	1.14186	1.15452
Gm9919	-0.00879152	0.00691408	0.0215167	-0.00641871	-0.0209132	-0.0211278	-0.020937	-0.0205715	-0.00879112
Gm15441	1.11301	1.10994	1.10728	1.1077	1.11309	1.15094	1.1396	1.11811	1.11996
Gm10635	2.55143	2.5549	2.56176	2.53519	2.56789	2.54482	2.64619	2.64222	2.57555
Olfr55	1.20705	1.20692	1.20686	1.20736	1.20707	1.29819	1.20704	1.22426	1.22059
Olfr239	1.54266	1.54251	1.54447	1.54837	1.54269	1.65558	1.54265	1.55698	1.55949
Isg15	2.70642	2.69448	2.70677	2.71936	2.72505	2.90464	2.68337	2.73981	2.73499
Gm2109	2.16533	2.17322	2.15321	2.1604	2.16819	2.21099	2.16904	2.19351	2.17424
Gm10250	1.61065	1.60564	1.62198	1.62305	1.59306	1.60111	1.60286	1.60137	1.60747
Gm14599	1.46941	1.46748	1.46464	1.4522	1.44603	1.45084	1.45246	1.44745	1.45631
Tmem207	0.679763	0.69171	0.67406	0.675228	0.65724	0.657037	0.657218	0.657565	0.668727
9530027J09Rik	1.11971	1.11123	1.11118	1.11161	1.12536	1.14842	1.1224	1.14197	1.12399
Gm19757	1.97178	1.9921	1.97818	1.99094	1.95385	1.96574	1.94745	1.96531	1.97067
Gm10591	1.38782	1.38269	1.38247	1.38151	1.39259	1.44386	1.39006	1.38177	1.39285
E230016K23Rik	1.91796	1.92176	1.91535	1.91797	1.93873	1.99027	1.9179	1.93994	1.93249
BE692007	1.76585	1.75148	1.75627	1.76867	1.76949	1.79239	1.77592	1.78415	1.77053
Gm29711	0.604071	0.603975	0.611049	0.60432	0.631537	0.630812	0.619688	0.619021	0.615559
Gm29917	0.318577	0.316872	0.311719	0.322989	0.294334	0.294127	0.294311	0.294662	0.305949
Gm30847	-0.196845	-0.196954	-0.197008	-0.196563	-0.169048	-0.185002	-0.17624	-0.154335	-0.183999
Gm30848	2.47652	2.45411	2.46243	2.45731	2.45993	2.46016	2.55091	2.50419	2.47819
Gm31088	0.442929	0.459114	0.506458	0.453497	0.442943	0.442743	0.442921	0.443263	0.454234
Gm31096	2.09872	2.08386	2.10741	2.08955	2.10984	2.09929	2.15766	2.1074	2.10672
Gm31957	0.00999862	0.0375091	0.0312441	0.0582325	0.0100144	0.00979715	0.00999024	0.01036	0.0221433
LOC102634389	1.27021	1.27294	1.26977	1.25756	1.25056	1.24517	1.24538	1.25829	1.25873
Gm32339	1.54991	1.57379	1.56047	1.55994	1.53984	1.54225	1.5335	1.53398	1.54921
Gm32535	1.15996	1.15985	1.16468	1.16024	1.1993	1.15974	1.19869	1.18013	1.17282
Gm32590	0.719269	0.730536	0.722954	0.694106	0.693873	0.69367	0.69385	0.694195	0.705307
Gm32597	0.2853	0.285204	0.285156	0.28555	0.328689	0.314418	0.304676	0.28564	0.296829
Gm33214	1.99456	2.00374	1.99368	1.98557	1.97453	1.975	1.97873	1.97973	1.98569
Gm33272	2.02022	2.01514	2.01502	2.02167	2.01542	2.07025	2.08396	2.09464	2.04204
Gm13067	2.6816	2.72332	2.66675	2.68755	2.66446	2.65582	2.64702	2.63039	2.66961
Gm11802	1.66189	1.65933	1.66241	1.66391	1.66201	1.67165	1.68875	1.687	1.66962
Gm16160	0.764852	0.78612	0.772649	0.771626	0.750668	0.750463	0.750645	0.750995	0.762252
Gm33489	1.15245	1.14411	1.14405	1.1445	1.1765	1.15351	1.15777	1.1838	1.15708
Gm41465	1.94008	1.93146	1.93253	1.94507	1.94493	1.99341	1.94457	1.94442	1.94706
Gm33856	2.76752	2.81687	2.7946	2.75672	2.80356	2.77873	2.83116	2.95451	2.81296
Gm13561	1.03875	1.03864	1.03859	1.03903	1.05959	1.05897	1.09737	1.03913	1.05126
Gm34283	1.64008	1.65934	1.62487	1.6217	1.60733	1.62084	1.61132	1.60782	1.62416
Gm34582	-0.383447	-0.37846	-0.39377	-0.396014	-0.415031	-0.415271	-0.415057	-0.414647	-0.401462
LOC102638003	1.01155	1.01433	1.01417	1.01183	1.02087	1.09175	1.01154	1.01576	1.02397
Gm34765	-0.00434038	-0.00444321	-0.00449438	-0.00407313	0.00792191	0.0365459	-0.0043488	0.0399651	0.00784163
Gm35552	0.413175	0.413077	0.413028	0.413431	0.440423	0.412982	0.439981	0.452063	0.42477
Gm35723	0.957104	0.96473	0.96123	0.984069	0.944597	0.944381	0.944573	0.952736	0.956677
Ifi206	1.79225	1.80224	1.79529	1.79916	1.81729	1.88145	1.80658	1.80627	1.81257
Gm36090	0.931901	0.931794	0.93174	0.932181	0.931918	1.01925	0.941624	0.932281	0.944086
Gm16193	0.365367	0.389293	0.354969	0.368852	0.346617	0.346412	0.346594	0.346943	0.358131
Gm36882	0.56956	0.569463	0.569415	0.579395	0.58594	0.586903	0.593531	0.59477	0.581122
Gm38580	1.8858	1.89407	1.87378	1.8749	1.86291	1.86047	1.84785	1.84848	1.86853
Gm38604	2.79693	2.75322	2.79457	2.77929	2.73145	2.72643	2.75374	2.71851	2.75677
Gm39034	0.0624365	0.0390104	0.0651059	0.0864646	0.0391281	0.0389116	0.0391041	0.0394727	0.0512042
Gm39105	0.115465	0.113515	0.102599	0.114101	0.0875411	0.0873286	0.0875175	0.0878792	0.0994934
Gm39134	0.250027	0.249929	0.24988	0.25028	0.250042	0.288345	0.279703	0.27513	0.261667
Gm39260	2.23189	2.21478	2.22617	2.2081	2.23226	2.22717	2.24624	2.26005	2.23083
Gm39351	2.49534	2.46252	2.48933	2.47614	2.48185	2.47798	2.58337	2.53017	2.49959
Gm39431	1.47815	1.47801	1.47794	1.47852	1.49415	1.48582	1.50466	1.55494	1.49402
1600015H23Rik	-0.295754	-0.289996	-0.284225	-0.267355	-0.310673	-0.310908	-0.310699	-0.310298	-0.297488
Gm39701	2.20488	2.21277	2.21068	2.20986	2.21986	2.24241	2.22741	2.23293	2.2201
Gm39804	2.46054	2.45513	2.47728	2.4488	2.47931	2.46051	2.56219	2.51071	2.48181
1700055L01Rik	1.78046	1.77705	1.76851	1.80374	1.767	1.76643	1.75975	1.76382	1.77334
Gm40185	0.274032	0.271948	0.243791	0.27942	0.243954	0.243745	0.243931	0.244286	0.255638
Gm40198	0.158744	0.125858	0.140414	0.153077	0.120775	0.120563	0.120752	0.121113	0.132662
Gm40648	1.17043	1.16493	1.16487	1.16532	1.19916	1.18322	1.19364	1.18188	1.17793
Gm41131	1.32121	1.3285	1.31055	1.34082	1.31181	1.30808	1.30191	1.30233	1.31565
Gm41231	1.97855	1.96555	1.99135	1.97926	1.96726	1.96151	1.95796	1.96124	1.97034
Gm41304	1.8533	1.8635	1.87002	1.85267	1.87758	1.87325	1.88311	1.87874	1.86902
Gm41402	1.80564	1.82368	1.81528	1.81114	1.79564	1.80577	1.79716	1.79601	1.80629
Gm41448	1.73699	1.73802	1.74403	1.7301	1.77452	1.7465	1.75263	1.76265	1.74818
Gm41784	1.43423	1.43573	1.43735	1.43572	1.45183	1.44451	1.45143	1.44704	1.44223
Gm41879	-0.318366	-0.318477	-0.318532	-0.318077	-0.288326	-0.292749	-0.296093	-0.290323	-0.305118
Gm41941	1.82961	1.83396	1.84255	1.84051	1.84807	1.84472	1.86617	1.86664	1.84653
Gm42203	0.106799	0.105192	0.083979	0.136436	0.0841468	0.0839311	0.0841229	0.08449	0.096137
Gm42282	0.269963	0.269867	0.26982	0.270212	0.269978	0.338897	0.279799	0.28254	0.281384
Gm11267	0.309763	0.327707	0.339725	0.354459	0.309778	0.309571	0.309755	0.310107	0.321358
Gm45924	1.29699	1.28663	1.3037	1.32461	1.27977	1.28603	1.27974	1.2894	1.29336
Mid1-ps1	2.94106	2.90588	2.92216	2.93992	2.93734	3.22241	3.02288	3.01045	2.98776
Gm45946	2.07792	2.07362	2.07159	2.06758	2.08501	2.08284	2.07914	2.11789	2.08195
LOC108167749	1.17585	1.18073	1.17569	1.18551	1.20215	1.20699	1.19414	1.18934	1.1888
Gm46177	0.60024	0.600143	0.600095	0.600491	0.620157	0.610395	0.642358	0.620107	0.611748
Gm46178	1.68485	1.68993	1.6426	1.69006	1.64284	1.64254	1.64281	1.64333	1.65987
Gm46243	2.17769	2.17697	2.13715	2.17852	2.13187	2.1306	2.12068	2.12051	2.14675
Gm46400	1.11402	1.11914	1.11386	1.12087	1.13351	1.12348	1.15398	1.13483	1.12671
LOC108168105	-0.0524566	-0.052561	-0.0526129	-0.0521854	-0.0211729	-0.0526621	-0.0156926	-0.0214099	-0.0400942
Gm46721	1.99261	2.00783	2.01178	2.03874	1.98973	1.99944	1.99102	1.99468	2.00323
Gm46827	0.0180068	0.0151762	-0.00737721	-0.0232916	-0.0235387	-0.0237532	-0.0235625	-0.0231973	-0.0114422
Gm43403	1.06274	1.03673	1.07244	1.07383	1.03685	1.03663	1.03683	1.0372	1.04916
Gm46900	1.95362	1.95403	1.95208	1.95984	1.96145	1.99593	1.96552	1.97188	1.9643
LOC115486550	2.42961	2.42121	2.43126	2.42176	2.45224	2.47571	2.44772	2.44789	2.44092
LOC115486944	0.0139482	0.0138458	0.0137948	0.0142143	0.013964	0.0394092	0.0490015	0.0506695	0.0261059
LOC115488298	0.761376	0.761278	0.76123	0.761628	0.782611	0.785381	0.795679	0.77484	0.773003
LOC115488649	2.14186	2.14688	2.13375	2.14667	2.15276	2.18151	2.15866	2.18975	2.15648
LOC115488800	1.86583	1.84575	1.85069	1.85688	1.83771	1.83999	1.83249	1.83886	1.84602
LOC115488940	1.07295	1.07283	1.07278	1.07325	1.07297	1.16397	1.07294	1.08444	1.08576
LOC115489125	1.89288	1.89164	1.88379	1.89053	1.91151	1.89991	1.89898	1.9158	1.89813
LOC115489684	0.111621	0.11152	0.11147	0.111881	0.111636	0.130667	0.16009	0.139289	0.123522
LOC115489703	1.66579	1.67275	1.67242	1.68162	1.69369	1.69569	1.69498	1.68927	1.68328

## Sheet: Fig 5 B
Figure 5 B Source data for GSEA
NAME	GS<br> follow link to MSigDB	GS DETAILS	SIZE	ES	NES	NOM p-val	RANK AT MAX	LEADING EDGE
LEIN_MIDBRAIN_MARKERS	LEIN_MIDBRAIN_MARKERS	Details ...	84	-0.804298	-1.47572	0	2143	tags=70%, list=13%, signal=80%
CLIMENT_BREAST_CANCER_COPY_NUMBER_UP	CLIMENT_BREAST_CANCER_COPY_NUMBER_UP	Details ...	23	-0.490816	-1.43943	0	909	tags=22%, list=5%, signal=23%
LEIN_PONS_MARKERS	LEIN_PONS_MARKERS	Details ...	91	-0.782708	-1.38724	0	1870	tags=59%, list=11%, signal=66%
MIKKELSEN_IPS_WITH_HCP_H3K27ME3	MIKKELSEN_IPS_WITH_HCP_H3K27ME3	Details ...	88	-0.544285	-1.27999	0	597	tags=19%, list=3%, signal=20%
MATZUK_SPERMATOZOA	MATZUK_SPERMATOZOA		102	-0.304685	-1.18967	0.0225141	1592	tags=20%, list=9%, signal=21%
VERRECCHIA_RESPONSE_TO_TGFB1_C1	VERRECCHIA_RESPONSE_TO_TGFB1_C1	Details ...	19	-0.678089	-1.41249	0.028463	419	tags=21%, list=2%, signal=22%
ASTON_MAJOR_DEPRESSIVE_DISORDER_DN	ASTON_MAJOR_DEPRESSIVE_DISORDER_DN	Details ...	155	-0.467862	-1.44981	0.0294695	3240	tags=41%, list=19%, signal=50%
MOOTHA_TCA	MOOTHA_TCA	Details ...	15	-0.656302	-1.55422	0.0315582	5451	tags=93%, list=32%, signal=137%

## Sheet: Fig 5 D
Figure 5 D Source data for GSEA
	list	Knockout/Control.fc	Knockout/Control.baseMean	WT_F1	WT_F2	WT_M1	WT_M2	Het_F1	Het_F2	Het_M1	Het_M2
1	Abca2	-1.14653	0.00107269	3.8369	3.84348	3.84106	3.84311	3.83207	3.82374	3.83162	3.8207
2	Arhgef10	-1.15475	0.0277598	3.5505	3.55795	3.54339	3.55892	3.55057	3.53472	3.53516	3.52104
3	Aspa	-1.24834	0.0218318	3.3454	3.35699	3.34863	3.33865	3.32861	3.34184	3.31768	3.29004
4	Cntn2	-1.14996	0.0352956	3.73481	3.7337	3.73005	3.73385	3.72779	3.70967	3.7298	3.70164
5	Gpr37	-1.23179	0.0493769	3.58685	3.59387	3.58617	3.58821	3.58076	3.57958	3.56761	3.52052
6	Htr4	-1.32267	0.0347327	3.26003	3.27922	3.25921	3.31546	3.27135	3.25492	3.22288	3.23543
7	Kif13b	-1.18547	0.0356056	3.57412	3.56881	3.57545	3.59216	3.57148	3.56844	3.55302	3.53569
8	Klk6	-1.81618	0.0246343	3.06605	3.14704	3.05229	3.06996	3.0679	3.05902	2.9766	2.97885
9	Mag	-1.25608	0.0467437	3.77074	3.77719	3.76642	3.75472	3.76523	3.74925	3.74758	3.70016
10	Myrf	-1.25858	0.0306708	3.56127	3.5706	3.55217	3.5708	3.55764	3.54865	3.53623	3.4962
11	Nfasc	-1.09781	0.0340839	3.8456	3.8454	3.8406	3.84176	3.83583	3.82604	3.84141	3.8314
12	Pmp22	-1.20081	0.0377629	3.41913	3.41181	3.39782	3.41493	3.40907	3.39227	3.38757	3.36291
13	Prpf19	-1.09684	0.0295577	3.74163	3.74701	3.74877	3.7406	3.74027	3.73621	3.73431	3.72696
14	Rasgrf1	-1.16216	0.0336641	3.86789	3.87276	3.87109	3.89774	3.86204	3.86186	3.86175	3.86636
15	Sorbs2	1.23929	0.0287225	3.73841	3.7305	3.7463	3.7176	3.75053	3.72854	3.77273	3.7702
16	Srpk3	-1.22697	0.0161525	3.09511	3.11344	3.08796	3.08995	3.08004	3.07312	3.07423	3.07525
17	St18	-1.61638	0.00902281	3.25863	3.25106	3.22709	3.30946	3.24537	3.22696	3.18049	3.16665
18	Tmem63a	-1.24221	0.0394534	3.4703	3.48415	3.46318	3.48077	3.4651	3.4632	3.4505	3.40841

## Sheet: Fig 5 E–H
	Figure 5 E–H Source data for SPT and FST in Rai14+/- mice.
		Figure 5 E				Figure 5 F				Figure 5G						Figure 5 H
		sucrose preference [%]				immobile time [%]				immobile time [%]						spine density/ mm
		WT	Rai14+/-			WT	Rai14+/-			WT	WT + FLX	Rai14+/-	Rai14+/- + FLX			WT	Rai14+/-	Rai14+/- + FLX
	number of mice	16	17		number of mice	10	12		number of mice	9	7	7	8		number of mouse brains	4	4	4
	Mean	71.12	52.86		Mean	66.12	79.51		Mean	59.91	60.28	80.73	55.79		Mean	9.081	5.966	8.717
	Std. Deviation	14.62	17.75		Std. Deviation	11.91	9.381		Std. Deviation	9.955	9.741	9.789	19.25		Std. Deviation	0.6852	0.7802	0.514
	Std. Error	3.655	4.304		Std. Error	3.766	2.708		Std. Error	3.318	3.682	3.7	6.805		Std. Error	0.3426	0.3901	0.257
	Test	student's t-test			Test	student's t-test			Test	1 way ANOVA with Bonferroni's Multiple Comparison Test					Test	1 way ANOVA with Bonferroni's Multiple Comparison Test
		76.4706	75			75.6112	80.8375			60.699	71.46	78.368	70.288		mouse 1 average	8.2873	5.37785	8.14901
		76.7442	62.963			59.8654	59.8796			72.887	45.186	90.42	67.562		mouse 1 neuron1	8.23217	4.72608	6.90184
		78.0488	77.7778			53.2863	66.7654			41.438	68.141	80.631	61.313		mouse 1 neuron2	7.54681	6.53659	7.83779
		64.4444	61.2903			81.4892	73.9383			47.715	65.27	60.372	24.165		mouse 1 neuron3	7.88704	5.33419	9.04726
		64.7059	41.3793			83.4775	91.0554			56.557	53.654	84.63	31.565		mouse 1 neuron4	8.58388	6.0719	8.18908
		59.1837	37.7778			54.8329	84.7688			64.31	52.678	86.588	79.258		mouse 1 neuron5	8.6706	4.67029	7.71962
		63.2653	73.3333			68.9721	89.7917			67.113	65.58	84.112	62.25		mouse 1 neuron6	8.18851	5.76154	8.69868
		78.7234	34.8837			48.7013	85.1892			66.886			49.903		mouse 1 neuron7	8.4917	5.20456	8.64881
		71.4286	65.2174			66.3967	85.2217			61.565					mouse 1 neuron8	8.09108	5.84509	6.53362
		25.641	28.5714			68.605	81.2467								mouse 1 neuron9	8.5062	4.85449
		80.8511	21.7391				82.5475								mouse 1 neuron10	8.78079	4.48167
		81.25	48.1481				72.8958								mouse 1 neuron11	8.13533	6.19888
		78.125	70.7317												mouse 1 neuron12	8.33342	4.84893
		75.7576	47.4576												mouse 2 average	9.5869	5.56797	8.72053
		91.4286	50												mouse 2 neuron1	10.4194	5.79213	9.25509
		71.875	67.8571												mouse 2 neuron2	10.5332	4.92183	9.49053
			34.4828												mouse 2 neuron3	9.07735	5.64624	8.92073
															mouse 2 neuron4	8.29133	5.47768	8.90574
															mouse 2 neuron5	9.56649	6.48897	8.32272
															mouse 2 neuron6	9.76927	5.93541	6.94774
															mouse 2 neuron7	9.29833	5.37468	9.07176
															mouse 2 neuron8	9.73979	5.61353	8.84996
															mouse 2 neuron9		5.06534
															mouse 2 neuron10		5.36396
															mouse 3 average	9.71511	5.81252	8.60406
															mouse 3 neuron1	9.77641	5.27335	8.18032
															mouse 3 neuron2	9.42285	4.78198	8.75766
															mouse 3 neuron3	8.84294	6.38931	8.8064
															mouse 3 neuron4	11.374	4.94458	7.45839
															mouse 3 neuron5	9.78008	5.6598	8.46877
															mouse 3 neuron6	9.66261	4.66681	8.60021
															mouse 3 neuron7	9.32121	6.30367	9.30186
															mouse 3 neuron8	9.5408	8.48068	9.70891
															mouse 3 neuron9			8.85955
															mouse 3 neuron10			7.68162
															mouse 3 neuron11			8.82096
															mouse 4 average	8.73361	7.10536	9.39322
															mouse 4 neuron1	9.10078	8.44223	8.60659
															mouse 4 neuron2	8.47601	6.81114	9.59649
															mouse 4 neuron3	9.58466	7.31805	9.46915
															mouse 4 neuron4	9.69305	6.6466	9.40763
															mouse 4 neuron5	6.90679	7.07612	8.12986
															mouse 4 neuron6	8.46994	7.24969	9.07998
															mouse 4 neuron7	9.0167	6.97649	10.2711
															mouse 4 neuron8	8.62095	6.32253	10.5849

## Sheet: Fig 5 I–K
	Figure 5 I–K Source data for chronic restraint stress model
		Figure 5 I																									Figure 5 J					Figure 5 K
		gained body weight [g]																									relative Rai14 mRNA normalized to GAPDH					endogenous Rai14 band intensity normalized to a-tubulin
		CTL							Chronic stress								Chronic stress + FLX										CTL	CRS	CRS + FLX			CTL	CRS	CRS + FLX
	number of mice	6							7								7									number of mouse brains	6	7	7		number of mouse brains	6	7	7
	Test	2 way ANOVA with Bonferroni Post Test																								Mean	1.071	0.5168	0.7701		Mean	100	64.74	83.55
		mouse1	mouse2	mouse3	mouse4	mouse5	mouse6	mean	mouse1	mouse2	mouse3	mouse4	mouse5	mouse6	mouse7	mean	mouse1	mouse2	mouse3	mouse4	mouse5	mouse6	mouse7	mean		Std. Deviation	0.4696	0.1786	0.3318		Std. Deviation	32.14	16.77	20.52
	Day 1	0	0	0	0	0	0	0	0	0	0	0	0	0	0	0	0	0	0	0	0	0	0	0		Std. Error	0.1917	0.06752	0.1254		Std. Error	13.12	6.337	7.757
	Day 2	-0.1	0.3	0.5	0.1	0.2	-0.4	0.1	-0.9	-1	-0.3	-0.6	-0.9	-0.3	-0.2	-0.6	0.2	-0.5	0.6	0	-0.9	-0.1	-1.2	-0.271429		Test	1 way ANOVA with Bonferroni's Multiple Comparison Test				Test	1 way ANOVA with Bonferroni's Multiple Comparison Test
	Day 3	-0.3	0.1	-0.5	-0.1	0	-0.3	-0.183333	-1.2	-1.1	-0.2	-0.6	-1.1	-0.6	-1.1	-0.842857	0.3	-0.4	0.8	0.2	0.1	-0.6	0	0.0571429			1.94079	0.811472	0.705876			63.0082	95.7581	108.004
	Day 4	-0.3	0.2	-0.1	-0.3	-0.1	-0.2	-0.133333	-1.5	-1.1	-0.1	-1.9	-1.2	-1.3	-0.6	-1.1	-0.3	-0.3	0.5	0.9	0.2	-1.1	0.2	0.0142857			0.812371	0.570637	1.4513			136.992	53.7957	75.1549
	Day 5	0	0.4	0.2	0.1	-0.1	0	0.1	-1.6	-1.2	-0.9	-0.8	-1.2	-1.6	-1.1	-1.2	-0.7	-0.1	0.5	0.6	-0.1	-0.6	0.5	0.0142857			1.19453	0.534987	0.691423			93.9026	65.3094	101.092
	Day 6	0.6	0.9	0.8	0.3	0.3	0.1	0.5	-2	-1.4	-0.7	-0.7	-0.4	-1.6	-0.8	-1.08571	-0.1	-0.5	0.9	1.7	-0.3	-0.9	1	0.257143			0.681907	0.533669	0.577767			106.097	49.0035	93.0381
	Day 7	0.2	0.6	0	0.1	0.7	-0.1	0.25	-1.7	-1.5	-0.9	-1.3	-1.2	-1.8	-1.1	-1.35714	0.4	-0.8	0.7	1.4	-0.2	-1.2	0.9	0.171429			0.735737	0.399072	0.636424			134.295	77.9501	92.6043
	Day 8	0.4	1.2	0.1	1.2	0.6	0.4	0.65	-1.8	-1.5	-0.7	-0.7	-1.4	-2	-1.1	-1.31429	-0.7	-0.8	1	0.9	0.1	-0.7	1.5	0.185714			1.05833	0.545196	0.897278			65.705	58.6652	54.4617
	Day 9	0.3	1	0.6	0.1	1.1	1.3	0.733333	-1.1	-1.5	-0.7	-0.6	-1	-1.8	-1	-1.1	-0.5	-0.6	0.5	0.9	0.5	0.1	1.4	0.328571				0.22278	0.430488				52.6876	60.4687
	Day 10	0.2	0.6	0.4	0.8	0.7	0.7	0.566667	-1.3	-1.9	-0.9	-0.8	-1.2	-1.8	-1.5	-1.34286	-0.7	-0.8	0.4	1.3	-0.1	-0.8	1.2	0.0714286
	Day 11	0.6	0.4	1.1	1	0.5	0.8	0.733333	-1.1	-1.6	-0.8	-0.7	-1.1	-0.8	-0.4	-0.928571	0.2	-0.6	0.6	1.1	0.9	-0.8	1.1	0.357143
	Day 12	0.1	0.6	0.9	0.5	0.6	1.1	0.633333	-1.1	-1.7	-0.7	-0.8	-1.4	-1.6	-1	-1.18571	0	-0.7	0.4	1.3	0	-0.3	1.1	0.257143
	Day 13	0.4	0.2	1	0.6	0.9	0.9	0.666667	-1.4	-1.8	-0.5	-0.7	-1.5	-1.8	-1.4	-1.3	-0.6	-0.9	0.4	1	0.1	-0.3	1	0.1
	Day 14	-0.4	0.5	1.5	0.8	0.4	1.2	0.666667	-0.9	-1.7	-0.8	-0.8	-1.7	-1.5	-1.1	-1.21429	0	-0.2	0.8	1	0.4	0.3	1	0.471429
	Day 15	-0.2	0.7	0.7	0.9	0.5	1.5	0.683333	-0.8	-1.6	-0.6	-0.3	-1.4	-1.6	-0.9	-1.02857	0	-0.4	0.9	0.9	0.4	-0.2	1.1	0.385714
